# Supplementary material for: Microscopic and Transcriptomic Analysis of Pollination Processes in Self-Incompatible Taraxacum koksaghyz
Source: Plants (Basel). 2021 Mar 16;10(3):555. doi: 10.3390/plants10030555 (PMC7998978; doi:10.3390/plants10030555)
Supplement: Supplementary file 1 [file plants-10-00555-s001.xlsx]

## Sheet: Content
Microscopic and Transcriptomic Analysis of Pollination Processes in Self-incompatible Taraxacum koksaghyz
Tassilo Erik Wollenweber 1, Nicole van Deenen 1, Kai-Uwe Roelfs 2, Dirk Prüfer 1,2 and Christian Schulze Gronover 2,*
Contact information
1Institute of Plant Biology and Biotechnology, University of Muenster, Schlossplatz 7-8, Muenster 48143, Germany.
2Fraunhofer Institute for Molecular Biology and Applied Ecology (IME), Schlossplatz 8, Muenster 48143, Germany.
E-Mail: wollenweber@uni-muenster.de; nicole.vandeenen@uni-muenster.de; kai.uwe.roelfs@ime.fraunhofer.de; dpruefer@uni-muenster.de; christian.schulze.gronover@ime.fraunhofer.de
Supplementary tables
Metadata:
Table S1. Raw read statistics
Table S2. Differentially expressed genes (DEGs) in cross-pollination (CP) T1 vs. T0
Table S3. DEGs in CP T2 vs. T1
Table S4. DEGs in CP T2 vs. T0
Table S5. DEGs in self-pollination (SP) T1 vs. T0
Table S6. DEGs in SP T2 vs. T1
Table S7. DEGs in SP T2 vs. T0
Table S8. Subsets of DEGs used for Venn analysis
Table S9. GO Enrichment analysis: Complete DEGs within CP and SP against GO background for T1 vs. T0 and T2 vs. T1, sharing the same expression pattern
Table S10. GO Enrichment analysis: Relative abundance of upregulated and downregulated DEGs within CP and SP against GO background for T1 vs. T0 and T2 vs. T1

## Sheet: Table_S1
Supplementary Table 1: Raw read statistics
Sample	Total Reads	Discarded Reads	Discarded Reads [%]	Clean Reads (single)	Clean Reads (single) [%]	Clean Reads	Clean Reads [%]	QC Passed Reads	Mapped Reads	Mapped Reads [%]
CP MS2 T0	20270618	235216	1.2	218518	1.1	19816884	97.8	19816884	16295367	82.2
CP MS2 T1	98683196	1659358	1.7	1565052	1.6	95458786	96.7	95458786	78012495	81.7
CP MS2 T2	73776930	1320335	1.8	1244941	1.7	71211654	96.5	71211654	57924280	81.3
CP MS3 T0	85520396	1441125	1.7	1361983	1.6	82717288	96.7	82717288	67968060	82.2
CP MS3 T1	97511428	1807954	1.9	1706994	1.8	93996480	96.4	93996480	77410236	82.4
CP MS3 T2	69699178	1371272	2	1275516	1.8	67052390	96.2	67052390	55291586	82.5
SP MS2 T0	69815406	1403907	2	1320457	1.9	67091042	96.1	67091042	55612138	82.9
SP MS2 T1	76175000	1118159	1.5	1043517	1.4	74013324	97.2	74013324	59343088	80.2
SP MS2 T2	75003388	1198457	1.6	1121107	1.5	72683824	96.9	72683824	58129006	80
SP MS3 T0	89422706	1393835	1.6	1306487	1.5	86722384	97	86722384	70240427	81
SP MS3 T1	75381724	1611024	2.1	1512270	2	72258430	95.9	72258430	59909391	82.9
SP MS3 T2	61376514	1350040	2.2	1268650	2.1	58757824	95.7	58757824	48638543	82.8

## Sheet: Table_S2
Supplementary Table 2: DEGs in CP T1 vs. T0
XLOC_id	gene	locus	sample	value_T1	value_T0	log2(fold_change)	test_stat	p_value	FDR_p-value_correction	significant	Homology based description (NCBI_Entry_ID)	Homology based description NCBI (Protein names)	Homology based description (Uniprot_Entry_ID)	Homology based description UniProt (Protein names)	Gene ontology IDs	Gene ontology (GO)
XLOC_000366	utg10178.1	utg10178|GWHAAAA00008475:34-1658	CP_TkMS2	60.5369	17.7908	-1.76668	-4.7406	0.0001	0.0189455	yes	OTG04715.1	putative protein kinase-like domain, Concanavalin A-like lectin/glucanase domain protein [Helianthus annuus]	Q9XID3	G-type lectin S-receptor-like serine/threonine-protein kinase At1g34300 (EC 2.7.11.1)	GO:0004674; GO:0005516; GO:0005524; GO:0005886; GO:0006468; GO:0016021; GO:0030246; GO:0048544	integral component of membrane [GO:0016021]; plasma membrane [GO:0005886]; ATP binding [GO:0005524]; calmodulin binding [GO:0005516]; carbohydrate binding [GO:0030246]; protein serine/threonine kinase activity [GO:0004674]; protein phosphorylation [GO:0006468]; recognition of pollen [GO:0048544]
XLOC_000871	utg10429.6	utg10429|GWHAAAA00002471:27156-28524	CP_TkMS2	4.3299	0	-Inf	NA	5e-05	0.0104067	yes	KVH90009.1	AP2/ERF domain-containing protein [Cynara cardunculus var. scolymus]	Q9FJ93	Dehydration-responsive element-binding protein 1D (Protein DREB1D) (C-repeat/dehydration-responsive element-binding factor 4) (C-repeat-binding factor 4) (CRT/DRE-binding factor 4)	GO:0003700; GO:0005634; GO:0006351; GO:0009738; GO:0019760; GO:0043565	nucleus [GO:0005634]; DNA binding transcription factor activity [GO:0003700]; sequence-specific DNA binding [GO:0043565]; abscisic acid-activated signaling pathway [GO:0009738]; glucosinolate metabolic process [GO:0019760]; transcription, DNA-templated [GO:0006351]
XLOC_000989	utg10481.2	utg10481|GWHAAAA00028353:10092-11003	CP_TkMS2	2.11446	0	-Inf	NA	5e-05	0.0104067	yes	.	.	Q7VGX8	Isoleucine--tRNA ligase (EC 6.1.1.5) (Isoleucyl-tRNA synthetase) (IleRS)	GO:0000049; GO:0002161; GO:0004822; GO:0005524; GO:0005737; GO:0006428; GO:0046872	cytoplasm [GO:0005737]; aminoacyl-tRNA editing activity [GO:0002161]; ATP binding [GO:0005524]; isoleucine-tRNA ligase activity [GO:0004822]; metal ion binding [GO:0046872]; tRNA binding [GO:0000049]; isoleucyl-tRNA aminoacylation [GO:0006428]
XLOC_001076	utg10529.1	utg10529|GWHAAAA00024980:19592-21093	CP_TkMS2	0.916469	0	-Inf	NA	0.00015	0.0260779	yes	XP_022046697.1	collagen alpha-1(I) chain-like [Acanthochromis polyacanthus]	B7LQP2	Electron transport complex subunit RsxB	GO:0005886; GO:0009055; GO:0046872; GO:0051539	plasma membrane [GO:0005886]; 4 iron, 4 sulfur cluster binding [GO:0051539]; electron transfer activity [GO:0009055]; metal ion binding [GO:0046872]
XLOC_001190	-	utg10581|GWHAAAA00002070:169180-169815	CP_TkMS2	68.9647	12.3974	-2.47582	-7.4356	0.00015	0.0260779	yes	.	.	.	.	.	.
XLOC_001319	utg10656.10	utg10656|GWHAAAA00026424:45234-46970	CP_TkMS2	38.2192	2.54446	-3.90886	-8.10281	5e-05	0.0104067	yes	XP_021972311.1	NAC domain-containing protein 67-like [Helianthus annuus]	Q52QH4	NAC domain-containing protein 68 (ONAC068) (OsNAC4)	GO:0003677; GO:0005634; GO:0006351; GO:0006355	nucleus [GO:0005634]; DNA binding [GO:0003677]; regulation of transcription, DNA-templated [GO:0006355]; transcription, DNA-templated [GO:0006351]
XLOC_001458	utg10727.3	utg10727|GWHAAAA00011989:21730-23649	CP_TkMS2	106.535	21.0515	-2.33934	-6.19118	5e-05	0.0104067	yes	KVH92521.1	Protein kinase, ATP binding site-containing protein [Cynara cardunculus var. scolymus]	O80888	Mitogen-activated protein kinase kinase kinase 17 (EC 2.7.11.25)	GO:0004674; GO:0004702; GO:0004709; GO:0005524; GO:0005634; GO:0005737; GO:0006970; GO:0007346; GO:0009737; GO:0009738; GO:0023014; GO:0031098; GO:0032147	cytoplasm [GO:0005737]; nucleus [GO:0005634]; ATP binding [GO:0005524]; MAP kinase kinase kinase activity [GO:0004709]; protein serine/threonine kinase activity [GO:0004674]; signal transducer, downstream of receptor, with serine/threonine kinase activity [GO:0004702]; abscisic acid-activated signaling pathway [GO:0009738]; activation of protein kinase activity [GO:0032147]; regulation of mitotic…
XLOC_001646	-	utg10823|GWHAAAA00015002:19811-20504	CP_TkMS2	4.12718	0	-Inf	NA	5e-05	0.0104067	yes	.	.	.	.	.	.
XLOC_001808	utg10902.20	utg10902|GWHAAAA00000551:93754-98985	CP_TkMS2	7.07609	0.535341	-3.72442	-6.06433	5e-05	0.0104067	yes	KVF53876.1	hypothetical protein Ccrd_026749 [Cynara cardunculus var. scolymus]	Q84JC2	Protein DOG1-like 4	GO:0006351; GO:0043565	sequence-specific DNA binding [GO:0043565]; transcription, DNA-templated [GO:0006351]
XLOC_001986	-	utg11016|GWHAAAA00012656:14694-16006	CP_TkMS2	65.5471	19.4013	-1.75638	-4.85822	0.0001	0.0189455	yes	.	.	.	.	.	.
XLOC_002074	utg11070.21	utg11070|GWHAAAA00009092:119328-123876	CP_TkMS2	52.2066	15.4589	-1.75579	-4.01854	5e-05	0.0104067	yes	OAY81871.1	Auxin response factor 16 [Ananas comosus]	Q8RYC8	Auxin response factor 19 (Auxin-responsive protein IAA22)	GO:0003677; GO:0003700; GO:0005634; GO:0006351; GO:0009723; GO:0009733; GO:0009734; GO:0010311; GO:0043565; GO:0046983; GO:0048366; GO:0048527	nucleus [GO:0005634]; DNA binding [GO:0003677]; DNA binding transcription factor activity [GO:0003700]; protein dimerization activity [GO:0046983]; sequence-specific DNA binding [GO:0043565]; auxin-activated signaling pathway [GO:0009734]; lateral root development [GO:0048527]; lateral root formation [GO:0010311]; leaf development [GO:0048366]; response to auxin [GO:0009733]; response to ethylene…
XLOC_002189	utg11111.6	utg11111|GWHAAAA00026129:34183-35622	CP_TkMS2	1.38519	0	-Inf	NA	5e-05	0.0104067	yes	XP_021969106.1	ethylene-responsive transcription factor ERF027-like [Helianthus annuus]	Q9FJ90	Ethylene-responsive transcription factor ERF025	GO:0003700; GO:0005634; GO:0006351; GO:0009873; GO:0019760; GO:0043565; GO:0044212; GO:0050832	nucleus [GO:0005634]; DNA binding transcription factor activity [GO:0003700]; sequence-specific DNA binding [GO:0043565]; transcription regulatory region DNA binding [GO:0044212]; defense response to fungus [GO:0050832]; ethylene-activated signaling pathway [GO:0009873]; glucosinolate metabolic process [GO:0019760]; transcription, DNA-templated [GO:0006351]
XLOC_002697	utg11403.13	utg11403|GWHAAAA00007417:56078-57084	CP_TkMS2	54.6276	2.10985	-4.69442	-9.0931	0.00015	0.0260779	yes	KVI01950.1	AP2/ERF domain-containing protein [Cynara cardunculus var. scolymus]	Q9SZ06	Ethylene-responsive transcription factor ERF109	GO:0003677; GO:0003700; GO:0005634; GO:0006351; GO:0009873; GO:0010087; GO:0010200; GO:0050832; GO:0051301	nucleus [GO:0005634]; DNA binding [GO:0003677]; DNA binding transcription factor activity [GO:0003700]; cell division [GO:0051301]; defense response to fungus [GO:0050832]; ethylene-activated signaling pathway [GO:0009873]; phloem or xylem histogenesis [GO:0010087]; response to chitin [GO:0010200]; transcription, DNA-templated [GO:0006351]
XLOC_002798	-	utg11447|GWHAAAA00024120:35901-36262	CP_TkMS2	10.2949	0	-Inf	NA	5e-05	0.0104067	yes	.	.	.	.	.	.
XLOC_002917	utg11528.13	utg11528|GWHAAAA00029222:55931-61172	CP_TkMS2	6.37849	1.10179	-2.53336	-4.74494	0.00025	0.0384831	yes	KVI05289.1	CYTH-like domain-containing protein [Cynara cardunculus var. scolymus]	Q54R62	Uridine-cytidine kinase C (EC 2.7.1.48) (Cytidine monophosphokinase C) (Uridine monophosphokinase C)	GO:0004849; GO:0005524; GO:0005829; GO:0006206; GO:0043097; GO:0044206; GO:0044211	cytosol [GO:0005829]; ATP binding [GO:0005524]; uridine kinase activity [GO:0004849]; CTP salvage [GO:0044211]; pyrimidine nucleobase metabolic process [GO:0006206]; pyrimidine nucleoside salvage [GO:0043097]; UMP salvage [GO:0044206]
XLOC_003021	utg11583.6	utg11583|GWHAAAA00025754:47042-48372	CP_TkMS2	1.56447	0	-Inf	NA	5e-05	0.0104067	yes	XP_022033514.1	RING-H2 finger protein ATL3-like [Helianthus annuus]	Q9XF63	RING-H2 finger protein ATL3 (EC 2.3.2.27) (RING-type E3 ubiquitin transferase ATL3)	GO:0016021; GO:0043161; GO:0046872; GO:0061630	integral component of membrane [GO:0016021]; metal ion binding [GO:0046872]; ubiquitin protein ligase activity [GO:0061630]; proteasome-mediated ubiquitin-dependent protein catabolic process [GO:0043161]
XLOC_003099	-	utg11630|GWHAAAA00003130:16522-17637	CP_TkMS2	18.7002	0	-Inf	NA	0.0001	0.0189455	yes	.	.	.	.	.	.
XLOC_003268	utg1171.6	utg1171|GWHAAAA00022468:16074-17025	CP_TkMS2	3.09425	0	-Inf	NA	5e-05	0.0104067	yes	KVI08314.1	Armadillo-like helical [Cynara cardunculus var. scolymus]	Q84TG3	E3 ubiquitin-protein ligase PUB23 (EC 2.3.2.27) (Plant U-box protein 23) (RING-type E3 ubiquitin transferase PUB23) (U-box domain-containing protein 23)	GO:0004842; GO:0005829; GO:0006952; GO:0009414; GO:0010200; GO:0016567; GO:0051865	cytosol [GO:0005829]; ubiquitin-protein transferase activity [GO:0004842]; defense response [GO:0006952]; protein autoubiquitination [GO:0051865]; protein ubiquitination [GO:0016567]; response to chitin [GO:0010200]; response to water deprivation [GO:0009414]
XLOC_003300	-	utg11729|GWHAAAA00006365:61661-64410	CP_TkMS2	58.4552	11.9226	-2.29364	-4.86333	5e-05	0.0104067	yes	.	.	.	.	.	.
XLOC_003566	utg11847.4	utg11847|GWHAAAA00008477:18932-21939	CP_TkMS2	11.4388	1.26608	-3.17549	-5.19995	5e-05	0.0104067	yes	XP_021982693.1	nudix hydrolase 17, mitochondrial-like [Helianthus annuus]	Q9ZU95	Nudix hydrolase 17, mitochondrial (AtNUDT17) (EC 3.6.1.-)	GO:0005634; GO:0005737; GO:0005739; GO:0016818; GO:0046872	cytoplasm [GO:0005737]; mitochondrion [GO:0005739]; nucleus [GO:0005634]; hydrolase activity, acting on acid anhydrides, in phosphorus-containing anhydrides [GO:0016818]; metal ion binding [GO:0046872]
XLOC_003875	utg12025.3	utg12025|GWHAAAA00016543:8710-9858	CP_TkMS2	1.37765	0	-Inf	NA	0.0002	0.0319514	yes	AJF11719.1	WRKY53 [Chrysanthemum x morifolium]	Q54N54	Putative uncharacterized protein DDB_G0285495	NA	NA
XLOC_003895	utg12035.4	utg12035|GWHAAAA00006723:17238-19408	CP_TkMS2	32.7149	109.378	1.7413	4.87415	0.00015	0.0260779	yes	XP_022012230.1	vignain-like [Helianthus annuus]	P25803	Vignain (EC 3.4.22.-) (Bean endopeptidase) (Cysteine proteinase EP-C1)	GO:0005788; GO:0008234	endoplasmic reticulum lumen [GO:0005788]; cysteine-type peptidase activity [GO:0008234]
XLOC_004064	utg12120.13	utg12120|GWHAAAA00011003:63061-64514	CP_TkMS2	76.2025	13.994	-2.44503	-6.55052	5e-05	0.0104067	yes	KVI09155.1	Calcium-binding EF-hand [Cynara cardunculus var. scolymus]	Q93Z27	Probable calcium-binding protein CML45 (Calmodulin-like protein 45)	GO:0005509	calcium ion binding [GO:0005509]
XLOC_004210	utg12213.14	utg12213|GWHAAAA00025075:51528-52448	CP_TkMS2	47.9007	10.3853	-2.2055	-5.96364	0.00015	0.0260779	yes	OTG16845.1	putative protein of unknown function DUF761, plant [Helianthus annuus]	Q4ICI6	Survival factor 1	GO:0005634; GO:0005737; GO:0006979	cytoplasm [GO:0005737]; nucleus [GO:0005634]; response to oxidative stress [GO:0006979]
XLOC_004373	utg12330.12	utg12330|GWHAAAA00008479:45408-49057	CP_TkMS2	9.63278	30.7725	1.67562	4.16181	0.00035	0.0487936	yes	XP_022025203.1	external alternative NAD(P)H-ubiquinone oxidoreductase B2, mitochondrial-like [Helianthus annuus]	Q94BV7	External alternative NAD(P)H-ubiquinone oxidoreductase B2, mitochondrial (EC 1.6.5.9) (External alternative NADH dehydrogenase NDB2) (NADH:ubiquinone reductase (non-electrogenic) NDB2)	GO:0005509; GO:0005739; GO:0005743; GO:0005758; GO:0005777; GO:0016491; GO:0055114	mitochondrial inner membrane [GO:0005743]; mitochondrial intermembrane space [GO:0005758]; mitochondrion [GO:0005739]; peroxisome [GO:0005777]; calcium ion binding [GO:0005509]; oxidoreductase activity [GO:0016491]; oxidation-reduction process [GO:0055114]
XLOC_004422	-	utg12382|GWHAAAA00030665:22393-24131	CP_TkMS2	80.1333	17.5139	-2.1939	-4.78767	5e-05	0.0104067	yes	.	.	.	.	.	.
XLOC_004812	utg12606.3	utg12606|GWHAAAA00000965:15283-16128	CP_TkMS2	38.5947	191.677	2.31221	7.35454	5e-05	0.0104067	yes	KVH95511.1	Bifunctional inhibitor/plant lipid transfer protein/seed storage helical domain-containing protein [Cynara cardunculus var. scolymus]	Q39176	Lipid transfer protein EARLI 1 (Protein EARLY ARABIDOPSIS ALUMINUM INDUCED 1) (pEARLI1)	GO:0005576; GO:0005783; GO:0009409; GO:0009505; GO:0009506; GO:0009651; GO:0009682; GO:0009707; GO:0009737; GO:0050832	chloroplast outer membrane [GO:0009707]; endoplasmic reticulum [GO:0005783]; extracellular region [GO:0005576]; plant-type cell wall [GO:0009505]; plasmodesma [GO:0009506]; defense response to fungus [GO:0050832]; induced systemic resistance [GO:0009682]; response to abscisic acid [GO:0009737]; response to cold [GO:0009409]; response to salt stress [GO:0009651]
XLOC_005025	utg12759.4	utg12759|GWHAAAA00000895:25344-26569	CP_TkMS2	7.30288	0	-Inf	NA	0.0001	0.0189455	yes	KVI05464.1	hypothetical protein Ccrd_016243 [Cynara cardunculus var. scolymus]	Q3JF36	DNA replication and repair protein RecF	GO:0003697; GO:0005524; GO:0005737; GO:0006260; GO:0006281; GO:0009432	cytoplasm [GO:0005737]; ATP binding [GO:0005524]; single-stranded DNA binding [GO:0003697]; DNA repair [GO:0006281]; DNA replication [GO:0006260]; SOS response [GO:0009432]
XLOC_005176	utg12842.12	utg12842|GWHAAAA00005486:35549-36431	CP_TkMS2	110.251	18.1174	-2.60534	-7.69236	5e-05	0.0104067	yes	KVH88699.1	hypothetical protein Ccrd_026043 [Cynara cardunculus var. scolymus]	Q48LV9	Ribosome maturation factor RimM	GO:0005840; GO:0006364; GO:0043022	ribosome [GO:0005840]; ribosome binding [GO:0043022]; rRNA processing [GO:0006364]
XLOC_005195	utg1284.23	utg1284|GWHAAAA00005520:156434-157756	CP_TkMS2	1.46208	0	-Inf	NA	5e-05	0.0104067	yes	KVH94412.1	F-box domain, cyclin-like protein [Cynara cardunculus var. scolymus]	Q93ZT5	EID1-like F-box protein 3	GO:0005634; GO:0006970; GO:0009414; GO:0009651; GO:0009737; GO:0009738; GO:0010029; GO:0010228	nucleus [GO:0005634]; abscisic acid-activated signaling pathway [GO:0009738]; regulation of seed germination [GO:0010029]; response to abscisic acid [GO:0009737]; response to osmotic stress [GO:0006970]; response to salt stress [GO:0009651]; response to water deprivation [GO:0009414]; vegetative to reproductive phase transition of meristem [GO:0010228]
XLOC_005373	utg12931.8	utg12931|GWHAAAA00018723:31029-36013	CP_TkMS2	115.996	17.2733	-2.74745	-6.6102	5e-05	0.0104067	yes	WP_011713795.1	epimerase [Magnetococcus marinus]	Q8T5T1	Midasin (Dynein-related AAA-ATPase MDN1) (MIDAS-containing protein)	GO:0000027; GO:0005524; GO:0005654; GO:0005730; GO:0016887	nucleolus [GO:0005730]; nucleoplasm [GO:0005654]; ATP binding [GO:0005524]; ATPase activity [GO:0016887]; ribosomal large subunit assembly [GO:0000027]
XLOC_005413	-	utg12950|GWHAAAA00028280:7638-9005	CP_TkMS2	17.2402	60.2562	1.80533	3.95503	5e-05	0.0104067	yes	.	.	.	.	.	.
XLOC_005710	utg1309.14	utg1309|GWHAAAA00004013:90623-92178	CP_TkMS2	107.38	26.8412	-2.0002	-4.31956	5e-05	0.0104067	yes	WP_095143495.1	MULTISPECIES: chitin-binding protein [Pseudomonas]	F4I8X6	Sulfite exporter TauE/SafE family protein 1	GO:0016021	integral component of membrane [GO:0016021]
XLOC_006020	utg1327.8	utg1327|GWHAAAA00012285:23470-25748	CP_TkMS2	19.6216	70.1252	1.83749	5.03808	5e-05	0.0104067	yes	OTF95800.1	putative glyceraldehyde-3-phosphate dehydrogenase, cytosolic [Helianthus annuus]	P26519	Glyceraldehyde-3-phosphate dehydrogenase, cytosolic (EC 1.2.1.12)	GO:0004365; GO:0005737; GO:0006006; GO:0006096; GO:0050661; GO:0051287	cytoplasm [GO:0005737]; glyceraldehyde-3-phosphate dehydrogenase (NAD+) (phosphorylating) activity [GO:0004365]; NAD binding [GO:0051287]; NADP binding [GO:0050661]; glucose metabolic process [GO:0006006]; glycolytic process [GO:0006096]
XLOC_006604	utg13601.26	utg13601|GWHAAAA00006228:129846-133961	CP_TkMS2	1.05634	0	-Inf	NA	5e-05	0.0104067	yes	KVH94754.1	Gelsolin domain-containing protein [Cynara cardunculus var. scolymus]	O81644	Villin-2	GO:0005737; GO:0005856; GO:0051015; GO:0051017; GO:0051693	cytoplasm [GO:0005737]; cytoskeleton [GO:0005856]; actin filament binding [GO:0051015]; actin filament bundle assembly [GO:0051017]; actin filament capping [GO:0051693]
XLOC_006611	utg13603.5	utg13603|GWHAAAA00030876:14857-18597	CP_TkMS2	36.1068	114.077	1.65966	3.7346	0.0002	0.0319514	yes	XP_010536661.1	PREDICTED: KDEL-tailed cysteine endopeptidase CEP1 [Tarenaya hassleriana]	Q9FGR9	KDEL-tailed cysteine endopeptidase CEP1 (EC 3.4.22.-) (Cysteine proteinase CP56) (AtCP56)	GO:0000325; GO:0004197; GO:0005615; GO:0005764; GO:0005783; GO:0009505; GO:0009555; GO:0009626; GO:0010623; GO:0048658; GO:0050832; GO:0051603	endoplasmic reticulum [GO:0005783]; extracellular space [GO:0005615]; lysosome [GO:0005764]; plant-type cell wall [GO:0009505]; plant-type vacuole [GO:0000325]; cysteine-type endopeptidase activity [GO:0004197]; anther wall tapetum development [GO:0048658]; defense response to fungus [GO:0050832]; plant-type hypersensitive response [GO:0009626]; pollen development [GO:0009555]; programmed cell de…
XLOC_006814	utg13726.14	utg13726|GWHAAAA00027353:31706-38090	CP_TkMS2	20.8647	65.7735	1.65644	3.81637	0.00015	0.0260779	yes	XP_022016948.1	ATPase 9, plasma membrane-type-like [Helianthus annuus]	Q42556	ATPase 9, plasma membrane-type (EC 3.6.3.6) (Proton pump 9)	GO:0005524; GO:0005774; GO:0005886; GO:0006754; GO:0008553; GO:0015992; GO:0016021; GO:0046872	integral component of membrane [GO:0016021]; plasma membrane [GO:0005886]; vacuolar membrane [GO:0005774]; ATP binding [GO:0005524]; hydrogen-exporting ATPase activity, phosphorylative mechanism [GO:0008553]; metal ion binding [GO:0046872]; ATP biosynthetic process [GO:0006754]; proton transport [GO:0015992]
XLOC_006916	utg13797.1	utg13797|GWHAAAA00003203:1039-1995	CP_TkMS2	67.8385	6.16067	-3.46095	-8.59628	5e-05	0.0104067	yes	XP_022022789.1	dirigent protein 22-like [Helianthus annuus]	Q9SS03	Dirigent protein 21 (AtDIR21)	GO:0005576; GO:0005618; GO:0016853	cell wall [GO:0005618]; extracellular region [GO:0005576]; isomerase activity [GO:0016853]
XLOC_007050	utg1389.3	utg1389|GWHAAAA00028031:13941-19976	CP_TkMS2	75.3831	14.735	-2.355	-5.90255	5e-05	0.0104067	yes	KVI06839.1	F-box domain, cyclin-like protein [Cynara cardunculus var. scolymus]	Q9M9E8	F-box protein At1g78280	GO:0005829	cytosol [GO:0005829]
XLOC_007064	utg13907.7	utg13907|GWHAAAA00005751:25727-28153	CP_TkMS2	32.0558	4.39381	-2.86704	-6.67001	5e-05	0.0104067	yes	KVI04848.1	Ankyrin repeat-containing protein [Cynara cardunculus var. scolymus]	Q9XEE6	Zinc finger CCCH domain-containing protein 29 (AtC3H29) (AtSZF2)	GO:0003677; GO:0003700; GO:0005634; GO:0006355; GO:0009409; GO:0010200; GO:0046872; GO:0050832	nucleus [GO:0005634]; DNA binding [GO:0003677]; DNA binding transcription factor activity [GO:0003700]; metal ion binding [GO:0046872]; defense response to fungus [GO:0050832]; regulation of transcription, DNA-templated [GO:0006355]; response to chitin [GO:0010200]; response to cold [GO:0009409]
XLOC_007899	utg14388.24	utg14388|GWHAAAA00004858:108358-109940	CP_TkMS2	43.5462	5.23056	-3.05751	-7.25495	5e-05	0.0104067	yes	KVH95587.1	Ribonuclease CAF1 [Cynara cardunculus var. scolymus]	Q9FMS6	Probable CCR4-associated factor 1 homolog 11 (EC 3.1.13.4)	GO:0000289; GO:0000932; GO:0003723; GO:0004535; GO:0005634; GO:0006351; GO:0006355; GO:0008408; GO:0017148; GO:0030015; GO:0042742; GO:0043928; GO:0046872	CCR4-NOT core complex [GO:0030015]; nucleus [GO:0005634]; P-body [GO:0000932]; 3'-5' exonuclease activity [GO:0008408]; metal ion binding [GO:0046872]; poly(A)-specific ribonuclease activity [GO:0004535]; RNA binding [GO:0003723]; defense response to bacterium [GO:0042742]; exonucleolytic nuclear-transcribed mRNA catabolic process involved in deadenylation-dependent decay [GO:0043928]; negative r…
XLOC_007950	utg14402.4	utg14402|GWHAAAA00023198:11365-16101	CP_TkMS2	0.956538	0	-Inf	NA	0.0003	0.0428333	yes	XP_021995288.1	pentatricopeptide repeat-containing protein At4g19191, mitochondrial [Helianthus annuus]	P0C8Q2	Pentatricopeptide repeat-containing protein At4g19191, mitochondrial	GO:0003723; GO:0004519; GO:0005739; GO:0009451; GO:0043231	intracellular membrane-bounded organelle [GO:0043231]; mitochondrion [GO:0005739]; endonuclease activity [GO:0004519]; RNA binding [GO:0003723]; RNA modification [GO:0009451]
XLOC_008114	utg14505.4	utg14505|GWHAAAA00007276:27932-29748	CP_TkMS2	1.80148	0	-Inf	NA	5e-05	0.0104067	yes	XP_021974029.1	putative two-component response regulator ARR21 isoform X2 [Helianthus annuus]	Q700D9	Putative Myb family transcription factor At1g14600	GO:0003677; GO:0003700; GO:0005634; GO:0006351; GO:0006355	nucleus [GO:0005634]; DNA binding [GO:0003677]; DNA binding transcription factor activity [GO:0003700]; regulation of transcription, DNA-templated [GO:0006355]; transcription, DNA-templated [GO:0006351]
XLOC_008164	utg14546.8	utg14546|GWHAAAA00004926:20294-24277	CP_TkMS2	10.5106	1.84443	-2.5106	-4.4341	0.00035	0.0487936	yes	XP_021981766.1	protein SAR DEFICIENT 1-like isoform X1 [Helianthus annuus]	F4K2R6	Calmodulin-binding protein 60 G	GO:0002229; GO:0002237; GO:0003700; GO:0005516; GO:0005634; GO:0006351; GO:0006355; GO:0009617; GO:0009620; GO:0009626; GO:0009697; GO:0009738; GO:0009789; GO:0009816; GO:0010112; GO:0010224; GO:0042742; GO:0043565; GO:0071219; GO:0071456; GO:0080142; GO:1902584	nucleus [GO:0005634]; calmodulin binding [GO:0005516]; DNA binding transcription factor activity [GO:0003700]; sequence-specific DNA binding [GO:0043565]; abscisic acid-activated signaling pathway [GO:0009738]; cellular response to hypoxia [GO:0071456]; cellular response to molecule of bacterial origin [GO:0071219]; defense response to bacterium [GO:0042742]; defense response to bacterium, incomp…
XLOC_008223	utg14566.12	utg14566|GWHAAAA00003701:49858-51643	CP_TkMS2	4.1348	0	-Inf	NA	5e-05	0.0104067	yes	KVH50258.1	UDP-glucuronosyl/UDP-glucosyltransferase [Cynara cardunculus var. scolymus]	F8WKW1	7-deoxyloganetin glucosyltransferase (EC 2.4.1.324) (Genipin glucosyltransferase) (UDP-glucose glucosyltransferase 2) (GjUGT2) (UDP-glycosyltransferase 85A24)	GO:0008152; GO:0035251	UDP-glucosyltransferase activity [GO:0035251]; metabolic process [GO:0008152]
XLOC_008256	utg14583.16	utg14583|GWHAAAA00012062:80532-82366	CP_TkMS2	0.933442	0	-Inf	NA	5e-05	0.0104067	yes	XP_021983448.1	UDP-glycosyltransferase 85C2-like [Helianthus annuus]	Q6VAB0	UDP-glycosyltransferase 85C2 (EC 2.4.1.-)	GO:0008152; GO:0035251	UDP-glucosyltransferase activity [GO:0035251]; metabolic process [GO:0008152]
XLOC_008328	utg14629.11	utg14629|GWHAAAA00018449:56294-58543	CP_TkMS2	64.0667	14.7247	-2.12134	-5.72787	5e-05	0.0104067	yes	XP_022013535.1	probable 2-oxoglutarate-dependent dioxygenase At5g05600 isoform X1 [Helianthus annuus]	Q9FFF6	Probable 2-oxoglutarate-dependent dioxygenase At5g05600 (EC 1.14.11.-)	GO:0005829; GO:0009813; GO:0046872; GO:0051213; GO:0080167; GO:0097237; GO:0120091; GO:2000022	cytosol [GO:0005829]; dioxygenase activity [GO:0051213]; jasmonic acid hydrolase [GO:0120091]; metal ion binding [GO:0046872]; cellular response to toxic substance [GO:0097237]; flavonoid biosynthetic process [GO:0009813]; regulation of jasmonic acid mediated signaling pathway [GO:2000022]; response to karrikin [GO:0080167]
XLOC_008348	utg14651.2	utg14651|GWHAAAA00007849:7978-9772	CP_TkMS2	62.0792	4.0344	-3.94369	-8.95699	5e-05	0.0104067	yes	XP_022025849.1	short-chain dehydrogenase TIC 32, chloroplastic-like [Helianthus annuus]	A2RVM0	Short-chain dehydrogenase TIC 32, chloroplastic (EC 1.1.1.-) (Translocon at the inner envelope membrane of chloroplasts 32) (AtTIC32)	GO:0005886; GO:0009507; GO:0009706; GO:0009941; GO:0015031; GO:0016491	chloroplast [GO:0009507]; chloroplast envelope [GO:0009941]; chloroplast inner membrane [GO:0009706]; plasma membrane [GO:0005886]; oxidoreductase activity [GO:0016491]; protein transport [GO:0015031]
XLOC_008740	utg1489.10	utg1489|GWHAAAA00001698:49872-51539	CP_TkMS2	1.21443	0	-Inf	NA	5e-05	0.0104067	yes	KVH89813.1	Glycosyl transferase, family 1 [Cynara cardunculus var. scolymus]	Q59002	Uncharacterized glycosyltransferase MJ1607 (EC 2.4.-.-)	GO:0016757	transferase activity, transferring glycosyl groups [GO:0016757]
XLOC_009317	utg15280.6	utg15280|GWHAAAA00007204:23639-24728	CP_TkMS2	1.77172	0	-Inf	NA	5e-05	0.0104067	yes	KVH91971.1	AP2/ERF domain-containing protein [Cynara cardunculus var. scolymus]	O80338	Ethylene-responsive transcription factor 2 (AtERF2) (Ethylene-responsive element-binding factor 2) (EREBP-2)	GO:0003677; GO:0003700; GO:0005634; GO:0006351; GO:0009864; GO:0009873; GO:0010087; GO:0010200; GO:0045893; GO:0051301	nucleus [GO:0005634]; DNA binding [GO:0003677]; DNA binding transcription factor activity [GO:0003700]; cell division [GO:0051301]; ethylene-activated signaling pathway [GO:0009873]; induced systemic resistance, jasmonic acid mediated signaling pathway [GO:0009864]; phloem or xylem histogenesis [GO:0010087]; positive regulation of transcription, DNA-templated [GO:0045893]; response to chitin [GO:…
XLOC_009736	utg1552.23	utg1552|GWHAAAA00007096:92359-93007	CP_TkMS2	57.2902	220.277	1.94296	7.06693	5e-05	0.0104067	yes	OQX05015.1	hypothetical protein BWK73_34720 [Thiothrix lacustris]	Q6INA9	Histone-lysine N-methyltransferase SETDB1 (EC 2.1.1.43) (SET domain bifurcated 1)	GO:0003677; GO:0005634; GO:0005694; GO:0006351; GO:0007265; GO:0008270; GO:0018024; GO:0090309; GO:1990841	chromosome [GO:0005694]; nucleus [GO:0005634]; DNA binding [GO:0003677]; histone-lysine N-methyltransferase activity [GO:0018024]; promoter-specific chromatin binding [GO:1990841]; zinc ion binding [GO:0008270]; positive regulation of methylation-dependent chromatin silencing [GO:0090309]; Ras protein signal transduction [GO:0007265]; transcription, DNA-templated [GO:0006351]
XLOC_009767	utg15549.5	utg15549|GWHAAAA00028996:15404-17189	CP_TkMS2	47.8393	8.05108	-2.57094	-6.47052	5e-05	0.0104067	yes	XP_021976767.1	probable WRKY transcription factor 70 [Helianthus annuus]	Q9LY00	Probable WRKY transcription factor 70 (WRKY DNA-binding protein 70)	GO:0003700; GO:0005634; GO:0006351; GO:0009751; GO:0009753; GO:0009862; GO:0009864; GO:0010200; GO:0031347; GO:0042742; GO:0043565; GO:0045892; GO:0050832; GO:1900056	nucleus [GO:0005634]; DNA binding transcription factor activity [GO:0003700]; sequence-specific DNA binding [GO:0043565]; defense response to bacterium [GO:0042742]; defense response to fungus [GO:0050832]; induced systemic resistance, jasmonic acid mediated signaling pathway [GO:0009864]; negative regulation of leaf senescence [GO:1900056]; negative regulation of transcription, DNA-templated [GO…
XLOC_009773	utg15552.6	utg15552|GWHAAAA00031512:16750-17363	CP_TkMS2	3.73833	0	-Inf	NA	5e-05	0.0104067	yes	KVH98707.1	hypothetical protein Ccrd_023069 [Cynara cardunculus var. scolymus]	Q5GVR6	Octanoyltransferase (EC 2.3.1.181) (Lipoate-protein ligase B) (Lipoyl/octanoyl transferase) (Octanoyl-[acyl-carrier-protein]-protein N-octanoyltransferase)	GO:0005737; GO:0009249; GO:0033819	cytoplasm [GO:0005737]; lipoyl(octanoyl) transferase activity [GO:0033819]; protein lipoylation [GO:0009249]
XLOC_009945	-	utg15678|GWHAAAA00019859:7356-8132	CP_TkMS2	2.27156	0	-Inf	NA	0.0001	0.0189455	yes	.	.	.	.	.	.
XLOC_010042	utg1572.15	utg1572|GWHAAAA00015187:70697-72890	CP_TkMS2	253.046	39.979	-2.66209	-7.13594	5e-05	0.0104067	yes	KVH96028.1	Senescence/spartin-associated [Cynara cardunculus var. scolymus]	O48832	Protein EARLY-RESPONSIVE TO DEHYDRATION 7, chloroplastic	GO:0005886; GO:0007623; GO:0009409; GO:0009414; GO:0009507; GO:0009644; GO:0009651; GO:0009737	chloroplast [GO:0009507]; plasma membrane [GO:0005886]; circadian rhythm [GO:0007623]; response to abscisic acid [GO:0009737]; response to cold [GO:0009409]; response to high light intensity [GO:0009644]; response to salt stress [GO:0009651]; response to water deprivation [GO:0009414]
XLOC_010275	utg15904.2	utg15904|GWHAAAA00026065:7205-9357	CP_TkMS2	0.776442	0	-Inf	NA	0.0001	0.0189455	yes	KVH95650.1	Cysteine peptidase, asparagine active site-containing protein, partial [Cynara cardunculus var. scolymus]	P25803	Vignain (EC 3.4.22.-) (Bean endopeptidase) (Cysteine proteinase EP-C1)	GO:0005788; GO:0008234	endoplasmic reticulum lumen [GO:0005788]; cysteine-type peptidase activity [GO:0008234]
XLOC_010325	utg15929.4	utg15929|GWHAAAA00004929:13865-17549	CP_TkMS2	73.0104	20.6878	-1.81933	-4.80813	0.0001	0.0189455	yes	OTG26814.1	putative protein phosphatase 2C family protein [Helianthus annuus]	Q9S9Z7	Probable protein phosphatase 2C 10 (AtPP2C10) (EC 3.1.3.16)	GO:0004722; GO:0005886; GO:0046872	plasma membrane [GO:0005886]; metal ion binding [GO:0046872]; protein serine/threonine phosphatase activity [GO:0004722]
XLOC_010627	utg16093.5	utg16093|GWHAAAA00013769:23931-25986	CP_TkMS2	39.1133	11.2618	-1.79622	-4.56602	0.0001	0.0189455	yes	KVI01369.1	NAD-dependent epimerase/dehydratase [Cynara cardunculus var. scolymus]	Q9M0B6	UDP-glucuronate 4-epimerase 1 (EC 5.1.3.6) (UDP-glucuronic acid epimerase 1) (AtUGlcAE3)	GO:0005768; GO:0005794; GO:0005802; GO:0016021; GO:0032580; GO:0033481; GO:0050378; GO:0050829; GO:0050832	endosome [GO:0005768]; Golgi apparatus [GO:0005794]; Golgi cisterna membrane [GO:0032580]; integral component of membrane [GO:0016021]; trans-Golgi network [GO:0005802]; UDP-glucuronate 4-epimerase activity [GO:0050378]; defense response to fungus [GO:0050832]; defense response to Gram-negative bacterium [GO:0050829]; galacturonate biosynthetic process [GO:0033481]
XLOC_011233	utg16500.11	utg16500|GWHAAAA00027910:49751-50796	CP_TkMS2	1.86893	0	-Inf	NA	5e-05	0.0104067	yes	XP_008347123.1	PREDICTED: uncharacterized protein LOC103410145 [Malus domestica]	A5D794	GTPase-activating protein and VPS9 domain-containing protein 1	GO:0005085; GO:0005096; GO:0005768; GO:0005829; GO:0006897; GO:0007165; GO:0016020; GO:0032794; GO:0045296; GO:0051223	cytosol [GO:0005829]; endosome [GO:0005768]; membrane [GO:0016020]; cadherin binding [GO:0045296]; GTPase activating protein binding [GO:0032794]; GTPase activator activity [GO:0005096]; guanyl-nucleotide exchange factor activity [GO:0005085]; endocytosis [GO:0006897]; regulation of protein transport [GO:0051223]; signal transduction [GO:0007165]
XLOC_011489	utg1662.3	utg1662|GWHAAAA00000150:6877-10095	CP_TkMS2	17.7517	3.50748	-2.33945	-4.79724	5e-05	0.0104067	yes	XP_021987303.1	bifunctional TH2 protein, mitochondrial-like [Helianthus annuus]	F4KFT7	Bifunctional TH2 protein, mitochondrial (THIAMINE REQUIRING 2) [Includes: Thiamine phosphate phosphatase (EC 3.1.3.100); Aminopyrimidine aminohydrolase (EC 3.5.99.2)]	GO:0005739; GO:0005829; GO:0009228; GO:0042131; GO:0050334	cytosol [GO:0005829]; mitochondrion [GO:0005739]; thiaminase activity [GO:0050334]; thiamine phosphate phosphatase activity [GO:0042131]; thiamine biosynthetic process [GO:0009228]
XLOC_011588	utg166.11	utg166|GWHAAAA00001624:46079-49268	CP_TkMS2	81.4414	13.4537	-2.59776	-5.86432	5e-05	0.0104067	yes	KVI01529.1	Harbinger transposase-derived nuclease [Cynara cardunculus var. scolymus]	Q9M2U3	Protein ALP1-like (EC 3.1.-.-)	GO:0004518; GO:0005634; GO:0046872	nucleus [GO:0005634]; metal ion binding [GO:0046872]; nuclease activity [GO:0004518]
XLOC_011919	utg16903.3	utg16903|GWHAAAA00012599:24317-25615	CP_TkMS2	1.9671	0	-Inf	NA	5e-05	0.0104067	yes	XP_022000131.1	E3 ubiquitin-protein ligase ATL41-like [Helianthus annuus]	Q9SLC3	E3 ubiquitin-protein ligase ATL41 (EC 2.3.2.27) (RING-H2 finger protein ATL41) (RING-type E3 ubiquitin transferase ATL41)	GO:0004842; GO:0016021; GO:0016567; GO:0043161; GO:0046872; GO:0061630	integral component of membrane [GO:0016021]; metal ion binding [GO:0046872]; ubiquitin protein ligase activity [GO:0061630]; ubiquitin-protein transferase activity [GO:0004842]; proteasome-mediated ubiquitin-dependent protein catabolic process [GO:0043161]; protein ubiquitination [GO:0016567]
XLOC_012164	utg17100.7	utg17100|GWHAAAA00009889:22145-24198	CP_TkMS2	60.781	19.0053	-1.67722	-4.37814	0.00035	0.0487936	yes	KVH93315.1	hypothetical protein Ccrd_004635 [Cynara cardunculus var. scolymus]	V5LLZ9	Gallate 1-beta-glucosyltransferase (EC 2.4.1.136) (UDP-glucose:gallate glucosyltransferase) (Vanillate 1-beta-glucosyltransferase)	GO:0008152; GO:0047913	gallate 1-beta-glucosyltransferase activity [GO:0047913]; metabolic process [GO:0008152]
XLOC_012210	utg17132.2	utg17132|GWHAAAA00027519:19329-20816	CP_TkMS2	5.46918	0	-Inf	NA	5e-05	0.0104067	yes	KZV56452.1	ADP,ATP carrier protein, mitochondrial [Dorcoceras hygrometricum]	P25083	ADP,ATP carrier protein, mitochondrial (ADP/ATP translocase) (Adenine nucleotide translocator) (ANT)	GO:0005743; GO:0016021; GO:0022857	integral component of membrane [GO:0016021]; mitochondrial inner membrane [GO:0005743]; transmembrane transporter activity [GO:0022857]
XLOC_012246	-	utg17158|GWHAAAA00025999:2910-4137	CP_TkMS2	2.03458	0	-Inf	NA	5e-05	0.0104067	yes	.	.	.	.	.	.
XLOC_012786	utg17592.6	utg17592|GWHAAAA00018261:38062-39878	CP_TkMS2	1.05906	0	-Inf	NA	0.0003	0.0428333	yes	XP_022012612.1	myb-related protein 315-like [Helianthus annuus]	P81394	Myb-related protein 315	GO:0003677; GO:0005634; GO:0006351; GO:0006355	nucleus [GO:0005634]; DNA binding [GO:0003677]; regulation of transcription, DNA-templated [GO:0006355]; transcription, DNA-templated [GO:0006351]
XLOC_012959	utg1769.4	utg1769|GWHAAAA00002748:32203-34583	CP_TkMS2	0.790904	0	-Inf	NA	5e-05	0.0104067	yes	XP_021992314.1	probable (S)-N-methylcoclaurine 3'-hydroxylase isozyme 2 [Helianthus annuus]	Q9SP06	(S)-N-methylcoclaurine 3'-hydroxylase isozyme 1 (EC 1.14.13.71) (Cytochrome P450 80B1) (Cytochrome P450 80B3) (Fragment)	GO:0002238; GO:0005506; GO:0005783; GO:0020037; GO:0050593; GO:1901012	endoplasmic reticulum [GO:0005783]; heme binding [GO:0020037]; iron ion binding [GO:0005506]; N-methylcoclaurine 3'-monooxygenase activity [GO:0050593]; (S)-reticuline biosynthetic process [GO:1901012]; response to molecule of fungal origin [GO:0002238]
XLOC_013071	utg17755.4	utg17755|GWHAAAA00009174:21860-23596	CP_TkMS2	1.77531	0	-Inf	NA	5e-05	0.0104067	yes	KVI05823.1	CO/COL/TOC1, conserved site-containing protein [Cynara cardunculus var. scolymus]	Q9LMA8	Protein TIFY 10A (Jasmonate ZIM domain-containing protein 1)	GO:0003714; GO:0005634; GO:0006351; GO:0006355; GO:0009555; GO:0009611; GO:0009753; GO:0009867; GO:0009908; GO:0031347; GO:0042742; GO:1900067; GO:1903507; GO:2000022	nucleus [GO:0005634]; transcription corepressor activity [GO:0003714]; defense response to bacterium [GO:0042742]; flower development [GO:0009908]; jasmonic acid mediated signaling pathway [GO:0009867]; negative regulation of nucleic acid-templated transcription [GO:1903507]; pollen development [GO:0009555]; regulation of cellular response to alkaline pH [GO:1900067]; regulation of defense respon…
XLOC_013151	utg1779.2	utg1779|GWHAAAA00011606:24871-28889	CP_TkMS2	0	0.985864	Inf	NA	5e-05	0.0104067	yes	CAA98176.1	RAB8E [Lotus japonicus]	Q39433	Ras-related protein RAB1BV	GO:0003924; GO:0005525; GO:0005886	plasma membrane [GO:0005886]; GTP binding [GO:0005525]; GTPase activity [GO:0003924]
XLOC_013732	utg18230.5	utg18230|GWHAAAA00018010:17616-19968	CP_TkMS2	0.737966	0	-Inf	NA	5e-05	0.0104067	yes	KVH94651.1	Transcription factor GRAS [Cynara cardunculus var. scolymus]	Q9XE58	Scarecrow-like protein 14 (AtSCL14) (GRAS family protein 2) (AtGRAS-2)	GO:0003700; GO:0005634; GO:0005829; GO:0006351; GO:0006355; GO:0009410; GO:0043565; GO:0045893	cytosol [GO:0005829]; nucleus [GO:0005634]; DNA binding transcription factor activity [GO:0003700]; sequence-specific DNA binding [GO:0043565]; positive regulation of transcription, DNA-templated [GO:0045893]; regulation of transcription, DNA-templated [GO:0006355]; response to xenobiotic stimulus [GO:0009410]; transcription, DNA-templated [GO:0006351]
XLOC_013950	utg18379.7	utg18379|GWHAAAA00018455:24684-26394	CP_TkMS2	50.0219	1.39199	-5.16734	-9.48944	5e-05	0.0104067	yes	XP_022015886.1	histidine kinase 1-like [Helianthus annuus]	Q9SXL4	Histidine kinase 1 (EC 2.7.13.3) (Arabidopsis histidine kinase 1) (AtHK1) (Protein AUTHENTIC HIS-KINASE 1)	GO:0000155; GO:0005034; GO:0005622; GO:0005886; GO:0006970; GO:0009414; GO:0009738; GO:0009927; GO:0010375; GO:0010431; GO:0016021	integral component of membrane [GO:0016021]; intracellular [GO:0005622]; plasma membrane [GO:0005886]; histidine phosphotransfer kinase activity [GO:0009927]; osmosensor activity [GO:0005034]; phosphorelay sensor kinase activity [GO:0000155]; abscisic acid-activated signaling pathway [GO:0009738]; response to osmotic stress [GO:0006970]; response to water deprivation [GO:0009414]; seed maturation…
XLOC_014501	-	utg18790|GWHAAAA00003353:17753-22396	CP_TkMS2	1.32907	7.45968	2.48869	4.09029	0.0003	0.0428333	yes	.	.	.	.	.	.
XLOC_014561	utg18834.3	utg18834|GWHAAAA00019471:17019-18806	CP_TkMS2	35.4083	3.70355	-3.25711	-7.2769	5e-05	0.0104067	yes	XP_022034983.1	serine/threonine-protein kinase OXI1-like [Helianthus annuus]	Q9LSF1	Serine/threonine-protein kinase OXI1 (EC 2.7.11.1) (AGC serine/threonine-protein kinase subfamily 2 member 1) (Protein OXIDATIVE SIGNAL-INDUCIBLE 1)	GO:0004672; GO:0004674; GO:0005524; GO:0005634; GO:0005737; GO:0005886; GO:0006468; GO:0006952; GO:0006979; GO:0009611; GO:0016301; GO:0019901; GO:0035556	cytoplasm [GO:0005737]; nucleus [GO:0005634]; plasma membrane [GO:0005886]; ATP binding [GO:0005524]; kinase activity [GO:0016301]; protein kinase activity [GO:0004672]; protein kinase binding [GO:0019901]; protein serine/threonine kinase activity [GO:0004674]; defense response [GO:0006952]; intracellular signal transduction [GO:0035556]; protein phosphorylation [GO:0006468]; response to oxidativ…
XLOC_015659	utg19598.9	utg19598|GWHAAAA00003076:19279-46563	CP_TkMS2	66.1757	9.09512	-2.86314	-3.65392	0.00025	0.0384831	yes	KHN77636.1	Fem-3 mRNA-binding factor 1 [Toxocara canis]	A7EHM8	Eukaryotic translation initiation factor 3 subunit B (eIF3b) (Eukaryotic translation initiation factor 3 90 kDa subunit homolog) (eIF3 p90) (Translation initiation factor eIF3, p90 subunit homolog)	GO:0003743; GO:0005852; GO:0031369	eukaryotic translation initiation factor 3 complex [GO:0005852]; translation initiation factor activity [GO:0003743]; translation initiation factor binding [GO:0031369]
XLOC_015690	utg19621.11	utg19621|GWHAAAA00001743:50856-52290	CP_TkMS2	28.5811	1.83857	-3.95841	-7.56325	5e-05	0.0104067	yes	XP_022001477.1	dehydration-responsive element-binding protein 1D-like [Helianthus annuus]	Q9FJ93	Dehydration-responsive element-binding protein 1D (Protein DREB1D) (C-repeat/dehydration-responsive element-binding factor 4) (C-repeat-binding factor 4) (CRT/DRE-binding factor 4)	GO:0003700; GO:0005634; GO:0006351; GO:0009738; GO:0019760; GO:0043565	nucleus [GO:0005634]; DNA binding transcription factor activity [GO:0003700]; sequence-specific DNA binding [GO:0043565]; abscisic acid-activated signaling pathway [GO:0009738]; glucosinolate metabolic process [GO:0019760]; transcription, DNA-templated [GO:0006351]
XLOC_015692	utg19621.4	utg19621|GWHAAAA00001743:24292-25193	CP_TkMS2	6.17695	0	-Inf	NA	5e-05	0.0104067	yes	AHI59150.1	DREB1A [Cichorium intybus]	Q9FJ93	Dehydration-responsive element-binding protein 1D (Protein DREB1D) (C-repeat/dehydration-responsive element-binding factor 4) (C-repeat-binding factor 4) (CRT/DRE-binding factor 4)	GO:0003700; GO:0005634; GO:0006351; GO:0009738; GO:0019760; GO:0043565	nucleus [GO:0005634]; DNA binding transcription factor activity [GO:0003700]; sequence-specific DNA binding [GO:0043565]; abscisic acid-activated signaling pathway [GO:0009738]; glucosinolate metabolic process [GO:0019760]; transcription, DNA-templated [GO:0006351]
XLOC_015864	utg19751.4	utg19751|GWHAAAA00030310:15991-17320	CP_TkMS2	53.533	12.3721	-2.11333	-5.59057	5e-05	0.0104067	yes	KVH97992.1	hypothetical protein Ccrd_023804 [Cynara cardunculus var. scolymus]	B6JWP7	Phosphatidylethanolamine N-methyltransferase (PE methyltransferase) (PEAMT) (PEMT) (EC 2.1.1.17)	GO:0004608; GO:0005789; GO:0006656; GO:0016021	endoplasmic reticulum membrane [GO:0005789]; integral component of membrane [GO:0016021]; phosphatidylethanolamine N-methyltransferase activity [GO:0004608]; phosphatidylcholine biosynthetic process [GO:0006656]
XLOC_015865	utg19751.5	utg19751|GWHAAAA00030310:19924-20984	CP_TkMS2	74.69	18.0836	-2.04624	-5.777	5e-05	0.0104067	yes	KVH97992.1	hypothetical protein Ccrd_023804 [Cynara cardunculus var. scolymus]	A0PSH1	Protein translocase subunit SecA 2	GO:0005524; GO:0005737; GO:0005886; GO:0006605; GO:0017038	cytoplasm [GO:0005737]; plasma membrane [GO:0005886]; ATP binding [GO:0005524]; protein import [GO:0017038]; protein targeting [GO:0006605]
XLOC_016051	utg19919.4	utg19919|GWHAAAA00003642:16581-22319	CP_TkMS2	51.7116	179.235	1.79329	5.11404	5e-05	0.0104067	yes	XP_010536661.1	PREDICTED: KDEL-tailed cysteine endopeptidase CEP1 [Tarenaya hassleriana]	Q9FGR9	KDEL-tailed cysteine endopeptidase CEP1 (EC 3.4.22.-) (Cysteine proteinase CP56) (AtCP56)	GO:0000325; GO:0004197; GO:0005615; GO:0005764; GO:0005783; GO:0009505; GO:0009555; GO:0009626; GO:0010623; GO:0048658; GO:0050832; GO:0051603	endoplasmic reticulum [GO:0005783]; extracellular space [GO:0005615]; lysosome [GO:0005764]; plant-type cell wall [GO:0009505]; plant-type vacuole [GO:0000325]; cysteine-type endopeptidase activity [GO:0004197]; anther wall tapetum development [GO:0048658]; defense response to fungus [GO:0050832]; plant-type hypersensitive response [GO:0009626]; pollen development [GO:0009555]; programmed cell de…
XLOC_016051	utg19919.7	utg19919|GWHAAAA00003642:16581-22319	CP_TkMS2	51.7116	179.235	1.79329	5.11404	5e-05	0.0104067	yes	XP_022012230.1	vignain-like [Helianthus annuus]	P25803	Vignain (EC 3.4.22.-) (Bean endopeptidase) (Cysteine proteinase EP-C1)	GO:0005788; GO:0008234	endoplasmic reticulum lumen [GO:0005788]; cysteine-type peptidase activity [GO:0008234]
XLOC_016132	utg19972.3	utg19972|GWHAAAA00009897:11360-16184	CP_TkMS2	2.60772	0	-Inf	NA	5e-05	0.0104067	yes	KVH98375.1	Uncharacterized protein family UPF0114 [Cynara cardunculus var. scolymus]	Q8BKX6	Serine/threonine-protein kinase SMG1 (SMG-1) (EC 2.7.11.1)	GO:0000184; GO:0003723; GO:0004674; GO:0005524; GO:0005634; GO:0005654; GO:0005737; GO:0006281; GO:0016301; GO:0018105; GO:0032204; GO:0042162; GO:0046777; GO:0046854; GO:0046872	cytoplasm [GO:0005737]; nucleoplasm [GO:0005654]; nucleus [GO:0005634]; ATP binding [GO:0005524]; kinase activity [GO:0016301]; metal ion binding [GO:0046872]; protein serine/threonine kinase activity [GO:0004674]; RNA binding [GO:0003723]; telomeric DNA binding [GO:0042162]; DNA repair [GO:0006281]; nuclear-transcribed mRNA catabolic process, nonsense-mediated decay [GO:0000184]; peptidyl-serine…
XLOC_016170	-	utg19985|GWHAAAA00018079:1347-3512	CP_TkMS2	2.93551	0	-Inf	NA	5e-05	0.0104067	yes	.	.	.	.	.	.
XLOC_017088	utg2063.3	utg2063|GWHAAAA00002750:19296-21913	CP_TkMS2	101.048	6.16152	-4.03561	-8.50741	5e-05	0.0104067	yes	KVH99786.1	EEIG1/EHBP1 N-terminal domain-containing protein [Cynara cardunculus var. scolymus]	A8HVH0	Acyl carrier protein (ACP)	GO:0005737; GO:0006633	cytoplasm [GO:0005737]; fatty acid biosynthetic process [GO:0006633]
XLOC_017254	utg2076.13	utg2076|GWHAAAA00020960:50100-53458	CP_TkMS2	34.8857	9.12155	-1.93528	-4.76926	5e-05	0.0104067	yes	XP_021994437.1	uncharacterized protein LOC110891086 [Helianthus annuus]	B2RID1	Asp/Glu-specific dipeptidyl-peptidase (EC 3.4.14.-) (Dipeptidyl-peptidase 11) (DPP11)	GO:0008239; GO:0009986; GO:0042277; GO:0043171; GO:0048588; GO:0070009	cell surface [GO:0009986]; dipeptidyl-peptidase activity [GO:0008239]; peptide binding [GO:0042277]; serine-type aminopeptidase activity [GO:0070009]; developmental cell growth [GO:0048588]; peptide catabolic process [GO:0043171]
XLOC_017397	utg2087.4	utg2087|GWHAAAA00010844:33826-35336	CP_TkMS2	27.5945	6.79611	-2.0216	-4.92592	0.00025	0.0384831	yes	KVH90567.1	Syntaxin/epimorphin, conserved site-containing protein [Cynara cardunculus var. scolymus]	Q9ZSD4	Syntaxin-121 (AtSYP121) (Syntaxin-related protein At-Syr1)	GO:0000149; GO:0005484; GO:0005802; GO:0005886; GO:0006612; GO:0006887; GO:0006906; GO:0006952; GO:0009504; GO:0009506; GO:0009620; GO:0009737; GO:0010119; GO:0010148; GO:0016021; GO:0016192; GO:0031201; GO:0031348; GO:0043495; GO:0048278; GO:0050832; GO:0072660	cell plate [GO:0009504]; integral component of membrane [GO:0016021]; plasma membrane [GO:0005886]; plasmodesma [GO:0009506]; SNARE complex [GO:0031201]; trans-Golgi network [GO:0005802]; protein membrane anchor [GO:0043495]; SNAP receptor activity [GO:0005484]; SNARE binding [GO:0000149]; defense response [GO:0006952]; defense response to fungus [GO:0050832]; exocytosis [GO:0006887]; maintenance…
XLOC_017511	utg20990.3	utg20990|GWHAAAA00025633:16778-24500	CP_TkMS2	0	0.916828	Inf	NA	5e-05	0.0104067	yes	KVH89826.1	Alcohol dehydrogenase, long-chain fatty [Cynara cardunculus var. scolymus]	O65709	Long-chain-alcohol oxidase FAO4A (EC 1.1.3.20) (Long-chain fatty alcohol oxidase 4A)	GO:0005622; GO:0016021; GO:0016491; GO:0046577; GO:0050660	integral component of membrane [GO:0016021]; intracellular [GO:0005622]; flavin adenine dinucleotide binding [GO:0050660]; long-chain-alcohol oxidase activity [GO:0046577]; oxidoreductase activity [GO:0016491]
XLOC_017641	utg21107.30	utg21107|GWHAAAA00018083:127785-129581	CP_TkMS2	23.4013	3.75737	-2.6388	-5.7806	5e-05	0.0104067	yes	XP_022025848.1	short-chain dehydrogenase TIC 32, chloroplastic-like [Helianthus annuus]	A2RVM0	Short-chain dehydrogenase TIC 32, chloroplastic (EC 1.1.1.-) (Translocon at the inner envelope membrane of chloroplasts 32) (AtTIC32)	GO:0005886; GO:0009507; GO:0009706; GO:0009941; GO:0015031; GO:0016491	chloroplast [GO:0009507]; chloroplast envelope [GO:0009941]; chloroplast inner membrane [GO:0009706]; plasma membrane [GO:0005886]; oxidoreductase activity [GO:0016491]; protein transport [GO:0015031]
XLOC_018147	utg21556.5	utg21556|GWHAAAA00011014:14999-16905	CP_TkMS2	1.45106	0	-Inf	NA	0.0003	0.0428333	yes	KVH97891.1	Brevis radix-like domain-containing protein [Cynara cardunculus var. scolymus]	Q5HZ09	Protein Brevis radix-like 3 (AtBRXL3)	GO:0005634	nucleus [GO:0005634]
XLOC_018676	utg2201.20	utg2201|GWHAAAA00012873:89994-91805	CP_TkMS2	43.4908	14.3223	-1.60245	-4.16306	0.0003	0.0428333	yes	XP_022001327.1	DNA damage-repair/toleration protein DRT100-like [Helianthus annuus]	Q00874	DNA damage-repair/toleration protein DRT100	GO:0000166; GO:0006281; GO:0009507	chloroplast [GO:0009507]; nucleotide binding [GO:0000166]; DNA repair [GO:0006281]
XLOC_019240	-	utg22506|GWHAAAA00022514:8641-9385	CP_TkMS2	2.41667	0	-Inf	NA	0.0001	0.0189455	yes	.	.	.	.	.	.
XLOC_019296	utg22554.7	utg22554|GWHAAAA00019878:24367-26104	CP_TkMS2	1.97143	0	-Inf	NA	5e-05	0.0104067	yes	KVI10052.1	Leucine-rich repeat-containing protein [Cynara cardunculus var. scolymus]	O22476	Protein BRASSINOSTEROID INSENSITIVE 1 (AtBRI1) (EC 2.7.10.1) (EC 2.7.11.1) (Brassinosteroid LRR receptor kinase)	GO:0001578; GO:0004672; GO:0004674; GO:0004714; GO:0005496; GO:0005524; GO:0005768; GO:0005886; GO:0009647; GO:0009729; GO:0009742; GO:0009911; GO:0010008; GO:0010224; GO:0010268; GO:0010584; GO:0016021; GO:0042802; GO:0042803; GO:0046982; GO:0048366; GO:0048657; GO:0060548; GO:1900140	endosome [GO:0005768]; endosome membrane [GO:0010008]; integral component of membrane [GO:0016021]; plasma membrane [GO:0005886]; ATP binding [GO:0005524]; identical protein binding [GO:0042802]; protein heterodimerization activity [GO:0046982]; protein homodimerization activity [GO:0042803]; protein kinase activity [GO:0004672]; protein serine/threonine kinase activity [GO:0004674]; steroid bind…
XLOC_019474	utg226.6	utg226|GWHAAAA00007167:8399-10106	CP_TkMS2	1.37085	0	-Inf	NA	0.0003	0.0428333	yes	KVI10065.1	Alcohol dehydrogenase, C-terminal [Cynara cardunculus var. scolymus]	P43903	Quinone oxidoreductase (EC 1.6.5.5) (NADPH:quinone reductase)	GO:0003960; GO:0005829; GO:0008270; GO:0017091; GO:0034599	cytosol [GO:0005829]; AU-rich element binding [GO:0017091]; NADPH:quinone reductase activity [GO:0003960]; zinc ion binding [GO:0008270]; cellular response to oxidative stress [GO:0034599]
XLOC_019861	utg23002.8	utg23002|GWHAAAA00022515:24269-25276	CP_TkMS2	3.81063	0	-Inf	NA	5e-05	0.0104067	yes	.	.	Q04661	Tyrosine-protein phosphatase CpsB (EC 3.1.3.48)	GO:0004725; GO:0030145; GO:0045227	manganese ion binding [GO:0030145]; protein tyrosine phosphatase activity [GO:0004725]; capsule polysaccharide biosynthetic process [GO:0045227]
XLOC_019875	utg23021.1	utg23021|GWHAAAA00021153:13627-19451	CP_TkMS2	27.8688	2.89999	-3.26453	-6.51464	5e-05	0.0104067	yes	XP_022021485.1	E3 ubiquitin-protein ligase RGLG2-like isoform X1 [Helianthus annuus]	Q9LY87	E3 ubiquitin-protein ligase RGLG2 (EC 2.3.2.27) (RING domain ligase 2)	GO:0004842; GO:0005634; GO:0005886; GO:0009690; GO:0009738; GO:0009850; GO:0046872; GO:0080148	nucleus [GO:0005634]; plasma membrane [GO:0005886]; metal ion binding [GO:0046872]; ubiquitin-protein transferase activity [GO:0004842]; abscisic acid-activated signaling pathway [GO:0009738]; auxin metabolic process [GO:0009850]; cytokinin metabolic process [GO:0009690]; negative regulation of response to water deprivation [GO:0080148]
XLOC_019971	utg2308.28	utg2308|GWHAAAA00015466:133368-136590	CP_TkMS2	8.23096	1.53148	-2.42613	-4.32263	5e-05	0.0104067	yes	XP_021997054.1	protein TIFY 10A-like isoform X2 [Helianthus annuus]	Q9LMA8	Protein TIFY 10A (Jasmonate ZIM domain-containing protein 1)	GO:0003714; GO:0005634; GO:0006351; GO:0006355; GO:0009555; GO:0009611; GO:0009753; GO:0009867; GO:0009908; GO:0031347; GO:0042742; GO:1900067; GO:1903507; GO:2000022	nucleus [GO:0005634]; transcription corepressor activity [GO:0003714]; defense response to bacterium [GO:0042742]; flower development [GO:0009908]; jasmonic acid mediated signaling pathway [GO:0009867]; negative regulation of nucleic acid-templated transcription [GO:1903507]; pollen development [GO:0009555]; regulation of cellular response to alkaline pH [GO:1900067]; regulation of defense respon…
XLOC_020189	utg23258.1	utg23258|GWHAAAA00016093:7248-8724	CP_TkMS2	1.94019	0	-Inf	NA	0.0002	0.0319514	yes	XP_017258418.1	PREDICTED: cyclin-dependent kinase E-1 [Daucus carota subsp. sativus]	Q336M2	Cyclin-dependent kinase E-1 (CDKE;1) (EC 2.7.11.22) (EC 2.7.11.23)	GO:0004693; GO:0005524; GO:0006468; GO:0007346; GO:0008353; GO:0016592	mediator complex [GO:0016592]; ATP binding [GO:0005524]; cyclin-dependent protein serine/threonine kinase activity [GO:0004693]; RNA polymerase II carboxy-terminal domain kinase activity [GO:0008353]; protein phosphorylation [GO:0006468]; regulation of mitotic cell cycle [GO:0007346]
XLOC_020611	utg2363.64	utg2363|GWHAAAA00002524:241796-244175	CP_TkMS2	12.4003	1.15957	-3.41872	-6.15132	5e-05	0.0104067	yes	KVH88763.1	Armadillo-like helical [Cynara cardunculus var. scolymus]	Q5PNY6	U-box domain-containing protein 21 (EC 2.3.2.27) (Plant U-box protein 21) (RING-type E3 ubiquitin transferase PUB21)	GO:0004842; GO:0010200	ubiquitin-protein transferase activity [GO:0004842]; response to chitin [GO:0010200]
XLOC_020619	utg2363.67	utg2363|GWHAAAA00002524:250567-252945	CP_TkMS2	59.0671	19.725	-1.58233	-4.18823	0.00025	0.0384831	yes	XP_022024045.1	UDP-glycosyltransferase 82A1 [Helianthus annuus]	Q9LHJ2	UDP-glycosyltransferase 82A1 (EC 2.4.1.-)	GO:0008152; GO:0043231; GO:0080043; GO:0080044	intracellular membrane-bounded organelle [GO:0043231]; quercetin 3-O-glucosyltransferase activity [GO:0080043]; quercetin 7-O-glucosyltransferase activity [GO:0080044]; metabolic process [GO:0008152]
XLOC_020766	utg2378.11	utg2378|GWHAAAA00001561:76605-80860	CP_TkMS2	110.518	30.3296	-1.86548	-4.7402	5e-05	0.0104067	yes	XP_021989388.1	C2 domain-containing protein At1g53590-like isoform X1 [Helianthus annuus]	Q93XX4	C2 domain-containing protein At1g53590 (N-terminal-TM-C2 domain type 6 protein 1) (NTMC2TYPE6.1)	GO:0005773; GO:0005783; GO:0005886; GO:0016021	endoplasmic reticulum [GO:0005783]; integral component of membrane [GO:0016021]; plasma membrane [GO:0005886]; vacuole [GO:0005773]
XLOC_021302	utg2426.15	utg2426|GWHAAAA00017332:74444-75539	CP_TkMS2	41.2485	183.669	2.1547	4.94413	5e-05	0.0104067	yes	KVH95511.1	Bifunctional inhibitor/plant lipid transfer protein/seed storage helical domain-containing protein [Cynara cardunculus var. scolymus]	Q39176	Lipid transfer protein EARLI 1 (Protein EARLY ARABIDOPSIS ALUMINUM INDUCED 1) (pEARLI1)	GO:0005576; GO:0005783; GO:0009409; GO:0009505; GO:0009506; GO:0009651; GO:0009682; GO:0009707; GO:0009737; GO:0050832	chloroplast outer membrane [GO:0009707]; endoplasmic reticulum [GO:0005783]; extracellular region [GO:0005576]; plant-type cell wall [GO:0009505]; plasmodesma [GO:0009506]; defense response to fungus [GO:0050832]; induced systemic resistance [GO:0009682]; response to abscisic acid [GO:0009737]; response to cold [GO:0009409]; response to salt stress [GO:0009651]
XLOC_022360	utg25360.2	utg25360|GWHAAAA00026996:9573-13152	CP_TkMS2	12.9819	2.57924	-2.33148	-4.61367	5e-05	0.0104067	yes	XP_021987304.1	xyloglucan galactosyltransferase KATAMARI1 homolog [Helianthus annuus]	Q7XJ98	Xyloglucan galactosyltransferase MUR3 (EC 2.4.1.-) (Protein KATAMARI) (Protein MURUS 3) (AtMUR3) (Protein SHORT ROOT IN SALT MEDIUM 3)	GO:0005768; GO:0005794; GO:0005802; GO:0006486; GO:0009826; GO:0009863; GO:0009969; GO:0010256; GO:0016757; GO:0030173; GO:0032580; GO:0042353	endosome [GO:0005768]; Golgi apparatus [GO:0005794]; Golgi cisterna membrane [GO:0032580]; integral component of Golgi membrane [GO:0030173]; trans-Golgi network [GO:0005802]; transferase activity, transferring glycosyl groups [GO:0016757]; endomembrane system organization [GO:0010256]; fucose biosynthetic process [GO:0042353]; protein glycosylation [GO:0006486]; salicylic acid mediated signaling…
XLOC_022442	utg25432.3	utg25432|GWHAAAA00003222:14729-16309	CP_TkMS2	82.1307	13.419	-2.61364	-5.54016	5e-05	0.0104067	yes	XP_021990249.1	blue copper protein-like isoform X1 [Helianthus annuus]	P42849	Umecyanin (UMC)	GO:0009055; GO:0046872	electron transfer activity [GO:0009055]; metal ion binding [GO:0046872]
XLOC_023220	utg26176.3	utg26176|GWHAAAA00031450:17047-21987	CP_TkMS2	447.649	58.7885	-2.92876	-7.69434	5e-05	0.0104067	yes	KVH96133.1	Actin cross-linking [Cynara cardunculus var. scolymus]	P12685	High-affinity potassium transport protein	GO:0005886; GO:0005887; GO:0015079; GO:0030007; GO:0045121	integral component of plasma membrane [GO:0005887]; membrane raft [GO:0045121]; plasma membrane [GO:0005886]; potassium ion transmembrane transporter activity [GO:0015079]; cellular potassium ion homeostasis [GO:0030007]
XLOC_023450	utg26446.7	utg26446|GWHAAAA00022347:20970-23118	CP_TkMS2	22.0846	3.46105	-2.67376	-5.84645	5e-05	0.0104067	yes	XP_021977947.1	mitogen-activated protein kinase 3-like [Helianthus annuus]	Q39023	Mitogen-activated protein kinase 3 (AtMPK3) (MAP kinase 3) (EC 2.7.11.24)	GO:0000169; GO:0004672; GO:0004707; GO:0005524; GO:0005634; GO:0005737; GO:0006970; GO:0006979; GO:0009409; GO:0009414; GO:0009555; GO:0009611; GO:0009617; GO:0009626; GO:0009738; GO:0010120; GO:0010183; GO:0010200; GO:0010224; GO:0010229; GO:0010468; GO:0042742; GO:0048481; GO:0050832; GO:0080136; GO:1901002	cytoplasm [GO:0005737]; nucleus [GO:0005634]; ATP binding [GO:0005524]; MAP kinase activity [GO:0004707]; protein kinase activity [GO:0004672]; abscisic acid-activated signaling pathway [GO:0009738]; activation of MAPK activity involved in osmosensory signaling pathway [GO:0000169]; camalexin biosynthetic process [GO:0010120]; defense response to bacterium [GO:0042742]; defense response to fungus…
XLOC_023755	-	utg2677|GWHAAAA00020364:17551-18426	CP_TkMS2	8.61552	0	-Inf	NA	5e-05	0.0104067	yes	.	.	.	.	.	.
XLOC_023793	utg2680.15	utg2680|GWHAAAA00010846:60730-61930	CP_TkMS2	160.745	35.4282	-2.18181	-6.30471	5e-05	0.0104067	yes	KVI03025.1	Late embryogenesis abundant protein, LEA-14 [Cynara cardunculus var. scolymus]	Q8LD98	NDR1/HIN1-like protein 6	GO:0005829; GO:0005886; GO:0006970; GO:0009737; GO:0009738; GO:0010116; GO:0016021; GO:1902074	cytosol [GO:0005829]; integral component of membrane [GO:0016021]; plasma membrane [GO:0005886]; abscisic acid-activated signaling pathway [GO:0009738]; positive regulation of abscisic acid biosynthetic process [GO:0010116]; response to abscisic acid [GO:0009737]; response to osmotic stress [GO:0006970]; response to salt [GO:1902074]
XLOC_023798	utg26815.1	utg26815|GWHAAAA00011381:12826-14850	CP_TkMS2	79.1837	24.8812	-1.67015	-4.4133	0.00025	0.0384831	yes	KVH74994.1	Armadillo-like helical [Cynara cardunculus var. scolymus]	Q84TG3	E3 ubiquitin-protein ligase PUB23 (EC 2.3.2.27) (Plant U-box protein 23) (RING-type E3 ubiquitin transferase PUB23) (U-box domain-containing protein 23)	GO:0004842; GO:0005829; GO:0006952; GO:0009414; GO:0010200; GO:0016567; GO:0051865	cytosol [GO:0005829]; ubiquitin-protein transferase activity [GO:0004842]; defense response [GO:0006952]; protein autoubiquitination [GO:0051865]; protein ubiquitination [GO:0016567]; response to chitin [GO:0010200]; response to water deprivation [GO:0009414]
XLOC_024069	utg27107.8	utg27107|GWHAAAA00013789:43566-45290	CP_TkMS2	4.69022	0	-Inf	NA	5e-05	0.0104067	yes	KVI08314.1	Armadillo-like helical [Cynara cardunculus var. scolymus]	Q84TG3	E3 ubiquitin-protein ligase PUB23 (EC 2.3.2.27) (Plant U-box protein 23) (RING-type E3 ubiquitin transferase PUB23) (U-box domain-containing protein 23)	GO:0004842; GO:0005829; GO:0006952; GO:0009414; GO:0010200; GO:0016567; GO:0051865	cytosol [GO:0005829]; ubiquitin-protein transferase activity [GO:0004842]; defense response [GO:0006952]; protein autoubiquitination [GO:0051865]; protein ubiquitination [GO:0016567]; response to chitin [GO:0010200]; response to water deprivation [GO:0009414]
XLOC_024470	-	utg27538|GWHAAAA00028541:18736-19770	CP_TkMS2	2.94545	0	-Inf	NA	0.0001	0.0189455	yes	.	.	.	.	.	.
XLOC_024600	-	utg2764|GWHAAAA00005252:52324-55094	CP_TkMS2	0	0.70653	Inf	NA	5e-05	0.0104067	yes	.	.	.	.	.	.
XLOC_024709	utg2773.7	utg2773|GWHAAAA00004651:23926-28346	CP_TkMS2	17.4242	4.5981	-1.92199	-4.29769	5e-05	0.0104067	yes	XP_022015675.1	ras-related protein RABA1f-like [Helianthus annuus]	Q40521	Ras-related protein Rab11B	GO:0003924; GO:0005525; GO:0005886	plasma membrane [GO:0005886]; GTP binding [GO:0005525]; GTPase activity [GO:0003924]
XLOC_024790	utg27840.1	utg27840|GWHAAAA00010892:8370-9704	CP_TkMS2	103.933	27.843	-1.90027	-5.32361	5e-05	0.0104067	yes	KVI08342.1	Late embryogenesis abundant protein, LEA-14 [Cynara cardunculus var. scolymus]	Q9FNH6	NDR1/HIN1-like protein 3	GO:0004871; GO:0005774; GO:0005794; GO:0005886; GO:0009506; GO:0009611; GO:0009617; GO:0009751; GO:0009816; GO:0016021; GO:0042742; GO:0046658; GO:0051607	anchored component of plasma membrane [GO:0046658]; Golgi apparatus [GO:0005794]; integral component of membrane [GO:0016021]; plasma membrane [GO:0005886]; plasmodesma [GO:0009506]; vacuolar membrane [GO:0005774]; signal transducer activity [GO:0004871]; defense response to bacterium [GO:0042742]; defense response to bacterium, incompatible interaction [GO:0009816]; defense response to virus [GO…
XLOC_024887	utg27954.4	utg27954|GWHAAAA00014063:11143-12252	CP_TkMS2	2.68877	0	-Inf	NA	5e-05	0.0104067	yes	XP_022032899.1	ethylene-responsive transcription factor ERF115-like [Helianthus annuus]	Q8L9K1	Ethylene-responsive transcription factor 13 (AtERF13) (Ethylene-responsive element-binding factor 13) (EREBP-13)	GO:0003677; GO:0003700; GO:0005634; GO:0006351; GO:0006952; GO:0009873; GO:0010200; GO:0043565	nucleus [GO:0005634]; DNA binding [GO:0003677]; DNA binding transcription factor activity [GO:0003700]; sequence-specific DNA binding [GO:0043565]; defense response [GO:0006952]; ethylene-activated signaling pathway [GO:0009873]; response to chitin [GO:0010200]; transcription, DNA-templated [GO:0006351]
XLOC_024946	utg28049.2	utg28049|GWHAAAA00028939:14646-18679	CP_TkMS2	47.6523	12.9234	-1.88256	-4.31533	5e-05	0.0104067	yes	XP_021994726.1	serine/threonine-protein kinase CTR1-like isoform X1 [Helianthus annuus]	Q05609	Serine/threonine-protein kinase CTR1 (EC 2.7.11.1) (Protein CONSTITUTIVE TRIPLE RESPONSE1)	GO:0001666; GO:0004674; GO:0004712; GO:0004871; GO:0005524; GO:0005789; GO:0009686; GO:0009723; GO:0009744; GO:0009750; GO:0009873; GO:0010105; GO:0010182; GO:0046777; GO:0048510; GO:0071281; GO:2000035; GO:2000069	endoplasmic reticulum membrane [GO:0005789]; ATP binding [GO:0005524]; protein serine/threonine kinase activity [GO:0004674]; protein serine/threonine/tyrosine kinase activity [GO:0004712]; signal transducer activity [GO:0004871]; cellular response to iron ion [GO:0071281]; ethylene-activated signaling pathway [GO:0009873]; gibberellin biosynthetic process [GO:0009686]; negative regulation of eth…
XLOC_025009	-	utg28112|GWHAAAA00024772:8142-10882	CP_TkMS2	0.858191	0	-Inf	NA	0.0003	0.0428333	yes	.	.	.	.	.	.
XLOC_025034	utg28150.6	utg28150|GWHAAAA00012859:33736-35323	CP_TkMS2	2.32256	0	-Inf	NA	5e-05	0.0104067	yes	XP_021976144.1	dynein light chain, cytoplasmic-like isoform X1 [Helianthus annuus]	Q86A88	Dynein light chain, cytoplasmic (Dynein light chain LC8-type 2)	GO:0003774; GO:0005737; GO:0005868; GO:0005874; GO:0008092; GO:0010970; GO:0045505; GO:0051959; GO:0060271; GO:2000582	cytoplasm [GO:0005737]; cytoplasmic dynein complex [GO:0005868]; microtubule [GO:0005874]; cytoskeletal protein binding [GO:0008092]; dynein intermediate chain binding [GO:0045505]; dynein light intermediate chain binding [GO:0051959]; motor activity [GO:0003774]; cilium assembly [GO:0060271]; positive regulation of ATP-dependent microtubule motor activity, plus-end-directed [GO:2000582]; transpo…
XLOC_025585	utg28717.4	utg28717|GWHAAAA00010564:13231-15861	CP_TkMS2	18.7032	3.35618	-2.47839	-5.50329	5e-05	0.0104067	yes	KVI03722.1	Cullin repeat-like-containing domain-containing protein [Cynara cardunculus var. scolymus]	Q9FGH9	Exocyst complex component EXO70B1 (AtExo70b1) (Exocyst subunit Exo70 family protein B1)	GO:0000145; GO:0005829; GO:0005886; GO:0006887; GO:0009414; GO:0009789; GO:0012505; GO:0042742; GO:0045335; GO:0050832; GO:0070062; GO:0090333	cytosol [GO:0005829]; endomembrane system [GO:0012505]; exocyst [GO:0000145]; extracellular exosome [GO:0070062]; phagocytic vesicle [GO:0045335]; plasma membrane [GO:0005886]; defense response to bacterium [GO:0042742]; defense response to fungus [GO:0050832]; exocytosis [GO:0006887]; positive regulation of abscisic acid-activated signaling pathway [GO:0009789]; regulation of stomatal closure [G…
XLOC_025847	utg28947.5	utg28947|GWHAAAA00009659:11867-12086	CP_TkMS2	3.05451	0	-Inf	NA	0.00035	0.0487936	yes	WP_032480010.1	penicillin-binding protein 1B [Vibrio cholerae]	P93311	60S ribosomal protein L2, mitochondrial	GO:0003729; GO:0003735; GO:0005739; GO:0005762; GO:0032543	mitochondrial large ribosomal subunit [GO:0005762]; mitochondrion [GO:0005739]; mRNA binding [GO:0003729]; structural constituent of ribosome [GO:0003735]; mitochondrial translation [GO:0032543]
XLOC_025926	utg29035.4	utg29035|GWHAAAA00029953:20080-32887	CP_TkMS2	5.21507	0.773446	-2.75331	-4.81774	5e-05	0.0104067	yes	XP_022033690.1	pleiotropic drug resistance protein 1-like [Helianthus annuus]	Q76CU2	Pleiotropic drug resistance protein 1 (NtPDR1)	GO:0005524; GO:0016021; GO:0016887	integral component of membrane [GO:0016021]; ATP binding [GO:0005524]; ATPase activity [GO:0016887]
XLOC_026030	utg29111.3	utg29111|GWHAAAA00016171:25599-28420	CP_TkMS2	30.102	7.91844	-1.92657	-4.74253	5e-05	0.0104067	yes	XP_022006061.1	glycerol-3-phosphate acyltransferase 1 [Helianthus annuus]	Q9SHJ5	Glycerol-3-phosphate acyltransferase 1 (AtGPAT1) (EC 2.3.1.15)	GO:0004366; GO:0005739; GO:0010143; GO:0016020; GO:0016021; GO:0016024; GO:0016311; GO:0016791; GO:0048235; GO:0080167; GO:0090447; GO:0102420	integral component of membrane [GO:0016021]; membrane [GO:0016020]; mitochondrion [GO:0005739]; glycerol-3-phosphate 2-O-acyltransferase activity [GO:0090447]; glycerol-3-phosphate O-acyltransferase activity [GO:0004366]; phosphatase activity [GO:0016791]; sn-1-glycerol-3-phosphate C16:0-DCA-CoA acyl transferase activity [GO:0102420]; CDP-diacylglycerol biosynthetic process [GO:0016024]; cutin bi…
XLOC_026195	utg29292.2	utg29292|GWHAAAA00030767:6469-9731	CP_TkMS2	0.812826	0	-Inf	NA	5e-05	0.0104067	yes	XP_021978273.1	CRS2-associated factor 2, mitochondrial isoform X1 [Helianthus annuus]	Q9FFU1	CRS2-associated factor 2, mitochondrial	GO:0003723; GO:0005739; GO:0006397; GO:0008380; GO:0030529	intracellular ribonucleoprotein complex [GO:0030529]; mitochondrion [GO:0005739]; RNA binding [GO:0003723]; mRNA processing [GO:0006397]; RNA splicing [GO:0008380]
XLOC_026439	utg2957.11	utg2957|GWHAAAA00011829:42561-45212	CP_TkMS2	19.6492	5.08356	-1.95056	-4.54357	0.0003	0.0428333	yes	ALF46571.1	GRAS protein, partial [Chrysanthemum x morifolium]	Q69VG1	Chitin-inducible gibberellin-responsive protein 1	GO:0003700; GO:0005634; GO:0006351; GO:0006355; GO:0043565	nucleus [GO:0005634]; DNA binding transcription factor activity [GO:0003700]; sequence-specific DNA binding [GO:0043565]; regulation of transcription, DNA-templated [GO:0006355]; transcription, DNA-templated [GO:0006351]
XLOC_026802	utg29967.5	utg29967|GWHAAAA00030939:14890-18459	CP_TkMS2	41.4756	7.18764	-2.52867	-5.69494	5e-05	0.0104067	yes	XP_021981833.1	probable receptor-like protein kinase At2g39360 [Helianthus annuus]	Q9LX66	Receptor-like protein kinase HERK 1 (EC 2.7.11.-) (Protein HERCULES RECEPTOR KINASE 1)	GO:0004672; GO:0004674; GO:0005524; GO:0005886; GO:0009506; GO:0009741; GO:0009826; GO:0016021	integral component of membrane [GO:0016021]; plasma membrane [GO:0005886]; plasmodesma [GO:0009506]; ATP binding [GO:0005524]; protein kinase activity [GO:0004672]; protein serine/threonine kinase activity [GO:0004674]; response to brassinosteroid [GO:0009741]; unidimensional cell growth [GO:0009826]
XLOC_026805	utg29971.1	utg29971|GWHAAAA00015373:342-2273	CP_TkMS2	12.4486	65.2884	2.39085	4.17114	0.0002	0.0319514	yes	XP_010485236.1	PREDICTED: actin-4-like [Camelina sativa]	O81221	Actin	GO:0005524; GO:0005737; GO:0005856	cytoplasm [GO:0005737]; cytoskeleton [GO:0005856]; ATP binding [GO:0005524]
XLOC_026902	-	utg30065|GWHAAAA00010241:19287-20115	CP_TkMS2	3.69571	0	-Inf	NA	5e-05	0.0104067	yes	.	.	.	.	.	.
XLOC_027181	-	utg30416|GWHAAAA00029675:22572-25905	CP_TkMS2	1.29142	0	-Inf	NA	5e-05	0.0104067	yes	.	.	.	.	.	.
XLOC_027307	utg30522.4	utg30522|GWHAAAA00013725:11020-11580	CP_TkMS2	4.26869	0	-Inf	NA	5e-05	0.0104067	yes	XP_022009598.1	uncharacterized protein LOC110908908 [Helianthus annuus]	Q8BV42	Zinc finger protein 786	GO:0003677; GO:0005634; GO:0006351; GO:0006355; GO:0046872	nucleus [GO:0005634]; DNA binding [GO:0003677]; metal ion binding [GO:0046872]; regulation of transcription, DNA-templated [GO:0006355]; transcription, DNA-templated [GO:0006351]
XLOC_027798	-	utg3110|GWHAAAA00002252:24023-25135	CP_TkMS2	3.38329	0	-Inf	NA	5e-05	0.0104067	yes	.	.	.	.	.	.
XLOC_027905	utg31221.3	utg31221|GWHAAAA00013454:27260-28780	CP_TkMS2	49.8363	150.739	1.59678	4.45713	0.0003	0.0428333	yes	XP_021996751.1	uncharacterized protein LOC110893905 [Helianthus annuus]	Q9M015	Uncharacterized protein At5g01610	NA	NA
XLOC_028056	-	utg31387|GWHAAAA00004562:14422-16155	CP_TkMS2	0.754413	0	-Inf	NA	0.0002	0.0319514	yes	.	.	.	.	.	.
XLOC_028112	utg3146.7	utg3146|GWHAAAA00018577:28505-29838	CP_TkMS2	1.18996	0	-Inf	NA	5e-05	0.0104067	yes	KVH99466.1	Protein of unknown function DUF1645 [Cynara cardunculus var. scolymus]	Q58531	GMP synthase [glutamine-hydrolyzing] subunit B (EC 6.3.5.2) (GMP synthetase)	GO:0003921; GO:0003922; GO:0005524; GO:0006177; GO:0016462	ATP binding [GO:0005524]; GMP synthase (glutamine-hydrolyzing) activity [GO:0003922]; GMP synthase activity [GO:0003921]; pyrophosphatase activity [GO:0016462]; GMP biosynthetic process [GO:0006177]
XLOC_028214	utg3157.2	utg3157|GWHAAAA00008658:4276-4919	CP_TkMS2	3.43461	0	-Inf	NA	0.0002	0.0319514	yes	KVH92911.1	hypothetical protein Ccrd_005058 [Cynara cardunculus var. scolymus]	Q9LU40	Protein MANNAN SYNTHESIS-RELATED 1 (AtMSR1) (EC 2.4.1.-) (O-fucosyltransferase 25) (O-FucT-25) (O-fucosyltransferase family protein)	GO:0000139; GO:0005768; GO:0005794; GO:0005802; GO:0006004; GO:0010412; GO:0016021; GO:0016757; GO:0051753; GO:0052325; GO:0097502	endosome [GO:0005768]; Golgi apparatus [GO:0005794]; Golgi membrane [GO:0000139]; integral component of membrane [GO:0016021]; trans-Golgi network [GO:0005802]; mannan synthase activity [GO:0051753]; transferase activity, transferring glycosyl groups [GO:0016757]; cell wall pectin biosynthetic process [GO:0052325]; fucose metabolic process [GO:0006004]; mannan metabolic process [GO:0010412]; mann…
XLOC_028866	utg32416.2	utg32416|GWHAAAA00030611:6868-9986	CP_TkMS2	1.52869	0	-Inf	NA	0.00025	0.0384831	yes	KVI08744.1	Zinc finger, RING/FYVE/PHD-type, partial [Cynara cardunculus var. scolymus]	Q8GT75	NEP1-interacting protein 1 (RING-H2 finger protein ATL26)	GO:0009535; GO:0016021; GO:0043161; GO:0046872; GO:0061630	chloroplast thylakoid membrane [GO:0009535]; integral component of membrane [GO:0016021]; metal ion binding [GO:0046872]; ubiquitin protein ligase activity [GO:0061630]; proteasome-mediated ubiquitin-dependent protein catabolic process [GO:0043161]
XLOC_029023	-	utg32645|GWHAAAA00021252:4237-5238	CP_TkMS2	5.6281	0	-Inf	NA	5e-05	0.0104067	yes	.	.	.	.	.	.
XLOC_029491	-	utg33282|GWHAAAA00026174:12464-16316	CP_TkMS2	0	0.680378	Inf	NA	0.0002	0.0319514	yes	.	.	.	.	.	.
XLOC_029692	utg33524.2	utg33524|GWHAAAA00012508:6304-8815	CP_TkMS2	51.6547	154.15	1.57736	3.60887	0.0003	0.0428333	yes	XP_022027306.1	multiprotein-bridging factor 1c [Helianthus annuus]	Q9LV58	Multiprotein-bridging factor 1c	GO:0003700; GO:0003713; GO:0005730; GO:0005737; GO:0006351; GO:0009408; GO:0009414; GO:0009737; GO:0009873; GO:0043565; GO:0045893	cytoplasm [GO:0005737]; nucleolus [GO:0005730]; DNA binding transcription factor activity [GO:0003700]; sequence-specific DNA binding [GO:0043565]; transcription coactivator activity [GO:0003713]; ethylene-activated signaling pathway [GO:0009873]; positive regulation of transcription, DNA-templated [GO:0045893]; response to abscisic acid [GO:0009737]; response to heat [GO:0009408]; response to wa…
XLOC_030131	-	utg34080|GWHAAAA00011030:10640-13068	CP_TkMS2	0.648437	0	-Inf	NA	0.0001	0.0189455	yes	.	.	.	.	.	.
XLOC_030399	utg34465.4	utg34465|GWHAAAA00009126:18576-19167	CP_TkMS2	9.43735	0	-Inf	NA	5e-05	0.0104067	yes	XP_022021424.1	calcium-binding protein CML38-like [Helianthus annuus]	Q9SRE6	Calcium-binding protein CML38 (Calmodulin-like protein 38)	GO:0005509; GO:0005886; GO:0009611	plasma membrane [GO:0005886]; calcium ion binding [GO:0005509]; response to wounding [GO:0009611]
XLOC_030695	utg34882.1	utg34882|GWHAAAA00014544:10142-12132	CP_TkMS2	27.308	97.9758	1.8431	4.92095	5e-05	0.0104067	yes	XP_022009290.1	extensin-2-like [Helianthus annuus]	Q9FS16	Extensin-3 (AtExt3) (AtExt5) (Extensin-3/5) (Protein ROOT-SHOOT-HYPOCOTYL-DEFECTIVE)	GO:0005199; GO:0005576; GO:0009530; GO:0009664	extracellular region [GO:0005576]; primary cell wall [GO:0009530]; structural constituent of cell wall [GO:0005199]; plant-type cell wall organization [GO:0009664]
XLOC_030777	utg34968.1	utg34968|GWHAAAA00019588:5535-8807	CP_TkMS2	100.244	26.2766	-1.93167	-4.94449	5e-05	0.0104067	yes	KVH93823.1	F-box domain, cyclin-like protein, partial [Cynara cardunculus var. scolymus]	Q708Y0	EIN3-binding F-box protein 2	GO:0005634; GO:0006511; GO:0009723; GO:0009873; GO:0010105; GO:0016567; GO:0019005	nucleus [GO:0005634]; SCF ubiquitin ligase complex [GO:0019005]; ethylene-activated signaling pathway [GO:0009873]; negative regulation of ethylene-activated signaling pathway [GO:0010105]; protein ubiquitination [GO:0016567]; response to ethylene [GO:0009723]; ubiquitin-dependent protein catabolic process [GO:0006511]
XLOC_030973	utg3518.59	utg3518|GWHAAAA00004438:287578-289178	CP_TkMS2	18.4088	64.7995	1.81559	5.14419	0.00025	0.0384831	yes	XP_021972858.1	soluble inorganic pyrophosphatase PPA1 [Helianthus annuus]	Q43187	Soluble inorganic pyrophosphatase PPA1 (EC 3.6.1.1) (Pyrophosphate phospho-hydrolase) (PPase)	GO:0000287; GO:0004427; GO:0005737; GO:0006796; GO:0071344	cytoplasm [GO:0005737]; inorganic diphosphatase activity [GO:0004427]; magnesium ion binding [GO:0000287]; diphosphate metabolic process [GO:0071344]; phosphate-containing compound metabolic process [GO:0006796]
XLOC_031080	utg35372.3	utg35372|GWHAAAA00026634:21433-22034	CP_TkMS2	4.42651	0	-Inf	NA	0.00015	0.0260779	yes	XP_009610278.1	PREDICTED: ethylene-responsive transcription factor ERF098-like [Nicotiana tomentosiformis]	Q9LTC5	Ethylene-responsive transcription factor ERF098	GO:0003677; GO:0003700; GO:0005634; GO:0006351; GO:0009873; GO:0010200	nucleus [GO:0005634]; DNA binding [GO:0003677]; DNA binding transcription factor activity [GO:0003700]; ethylene-activated signaling pathway [GO:0009873]; response to chitin [GO:0010200]; transcription, DNA-templated [GO:0006351]
XLOC_031141	utg35477.8	utg35477|GWHAAAA00019972:26822-27601	CP_TkMS2	270.952	1093.75	2.01317	4.70914	5e-05	0.0104067	yes	OTF91088.1	putative glycine rich protein [Helianthus annuus]	P23137	Glycine-rich protein	GO:0005576; GO:0005618; GO:0006952; GO:0009607; GO:0071555	cell wall [GO:0005618]; extracellular region [GO:0005576]; cell wall organization [GO:0071555]; defense response [GO:0006952]; response to biotic stimulus [GO:0009607]
XLOC_031388	utg35854.4	utg35854|GWHAAAA00029118:10981-14816	CP_TkMS2	59.7799	1.80215	-5.05187	-7.25584	5e-05	0.0104067	yes	ASL72070.1	ERF [Taraxacum kok-saghyz]	Q9SZ06	Ethylene-responsive transcription factor ERF109	GO:0003677; GO:0003700; GO:0005634; GO:0006351; GO:0009873; GO:0010087; GO:0010200; GO:0050832; GO:0051301	nucleus [GO:0005634]; DNA binding [GO:0003677]; DNA binding transcription factor activity [GO:0003700]; cell division [GO:0051301]; defense response to fungus [GO:0050832]; ethylene-activated signaling pathway [GO:0009873]; phloem or xylem histogenesis [GO:0010087]; response to chitin [GO:0010200]; transcription, DNA-templated [GO:0006351]
XLOC_031527	utg3601.6	utg3601|GWHAAAA00008458:25174-25447	CP_TkMS2	764.548	67.4092	-3.50359	-31.8907	5e-05	0.0104067	yes	KVH93911.1	Arabinogalactan peptide, AGP [Cynara cardunculus var. scolymus]	O82337	Arabinogalactan peptide 16 (AG-peptide 16)	GO:0005886; GO:0031225	anchored component of membrane [GO:0031225]; plasma membrane [GO:0005886]
XLOC_031749	-	utg3626|GWHAAAA00016193:64455-65031	CP_TkMS2	0	3.54342	Inf	NA	0.0002	0.0319514	yes	.	.	.	.	.	.
XLOC_031822	utg3636.3	utg3636|GWHAAAA00015663:8631-13499	CP_TkMS2	20.5639	1.35278	-3.92612	-8.16322	5e-05	0.0104067	yes	XP_022025001.1	uncharacterized protein LOC110925354 [Helianthus annuus]	E1C3S7	Tudor domain-containing protein 7	GO:0002089; GO:0003729; GO:0005737; GO:0007283; GO:0010608; GO:0035770; GO:0070306	cytoplasm [GO:0005737]; ribonucleoprotein granule [GO:0035770]; mRNA binding [GO:0003729]; lens fiber cell differentiation [GO:0070306]; lens morphogenesis in camera-type eye [GO:0002089]; posttranscriptional regulation of gene expression [GO:0010608]; spermatogenesis [GO:0007283]
XLOC_031914	utg3649.1	utg3649|GWHAAAA00005461:46403-48877	CP_TkMS2	35.6982	8.10202	-2.1395	-5.40974	0.0002	0.0319514	yes	OTG29698.1	putative S-crystallin [Helianthus annuus]	P32110	Probable glutathione S-transferase (EC 2.5.1.18) (G2-4) (Heat shock protein 26A)	GO:0004364; GO:0005737; GO:0006749; GO:0009407; GO:0009408; GO:0009733; GO:0009735; GO:0009737; GO:0009739; GO:0010038	cytoplasm [GO:0005737]; glutathione transferase activity [GO:0004364]; glutathione metabolic process [GO:0006749]; response to abscisic acid [GO:0009737]; response to auxin [GO:0009733]; response to cytokinin [GO:0009735]; response to gibberellin [GO:0009739]; response to heat [GO:0009408]; response to metal ion [GO:0010038]; toxin catabolic process [GO:0009407]
XLOC_031991	utg36625.2	utg36625|GWHAAAA00015587:5633-8152	CP_TkMS2	11.093	1.5361	-2.8523	-5.4862	0.00015	0.0260779	yes	KVI04295.1	AP2/ERF domain-containing protein [Cynara cardunculus var. scolymus]	Q40477	Ethylene-responsive transcription factor 4 (Ethylene-responsive element-binding factor 3) (EREBP-3) (Ethylene-responsive element-binding factor 4 homolog) (NtERF3)	GO:0003677; GO:0003700; GO:0005634; GO:0006351; GO:0006952; GO:0009873	nucleus [GO:0005634]; DNA binding [GO:0003677]; DNA binding transcription factor activity [GO:0003700]; defense response [GO:0006952]; ethylene-activated signaling pathway [GO:0009873]; transcription, DNA-templated [GO:0006351]
XLOC_032092	utg36768.2	utg36768|GWHAAAA00027725:12638-13800	CP_TkMS2	187.874	55.8295	-1.75067	-5.18486	5e-05	0.0104067	yes	KVH97062.1	Zinc finger, A20-type [Cynara cardunculus var. scolymus]	Q9LHJ8	Zinc finger A20 and AN1 domain-containing stress-associated protein 5 (AtSAP5)	GO:0003677; GO:0004842; GO:0005634; GO:0006970; GO:0008270; GO:0009414; GO:0016567; GO:0051865	nucleus [GO:0005634]; DNA binding [GO:0003677]; ubiquitin-protein transferase activity [GO:0004842]; zinc ion binding [GO:0008270]; protein autoubiquitination [GO:0051865]; protein ubiquitination [GO:0016567]; response to osmotic stress [GO:0006970]; response to water deprivation [GO:0009414]
XLOC_032530	utg3754.42	utg3754|GWHAAAA00008161:130622-152816	CP_TkMS2	8.05759	0.393226	-4.35692	-5.63104	0.0003	0.0428333	yes	BAT74232.1	hypothetical protein VIGAN_01185400, partial [Vigna angularis var. angularis]	Q9H611	ATP-dependent DNA helicase PIF1 (EC 3.6.4.12) (DNA repair and recombination helicase PIF1) (PIF1/RRM3 DNA helicase-like protein)	GO:0000002; GO:0000287; GO:0000723; GO:0000784; GO:0005524; GO:0005657; GO:0005739; GO:0006260; GO:0006281; GO:0006310; GO:0010521; GO:0017116; GO:0032204; GO:0032211; GO:0033682; GO:0042162; GO:0043141; GO:0044806; GO:0051974	mitochondrion [GO:0005739]; nuclear chromosome, telomeric region [GO:0000784]; replication fork [GO:0005657]; ATP binding [GO:0005524]; ATP-dependent 5'-3' DNA helicase activity [GO:0043141]; ATP-dependent 5'-3' DNA/RNA helicase activity [GO:0033682]; magnesium ion binding [GO:0000287]; single-stranded DNA-dependent ATP-dependent DNA helicase activity [GO:0017116]; telomerase inhibitor activity […
XLOC_032808	utg3835.10	utg3835|GWHAAAA00022060:35921-39453	CP_TkMS2	269.269	32.2617	-3.06115	-7.72376	5e-05	0.0104067	yes	KVH90561.1	Calcium-binding EF-hand [Cynara cardunculus var. scolymus]	Q06850	Calcium-dependent protein kinase 1 (AtCDPK 1) (CDPK 1) (EC 2.7.11.1) (Calcium-dependent protein kinase isoform AK1)	GO:0004674; GO:0004683; GO:0005509; GO:0005516; GO:0005524; GO:0005634; GO:0005777; GO:0005778; GO:0006468; GO:0009738; GO:0009931; GO:0010857; GO:0018105; GO:0035556; GO:0046777	nucleus [GO:0005634]; peroxisomal membrane [GO:0005778]; peroxisome [GO:0005777]; ATP binding [GO:0005524]; calcium ion binding [GO:0005509]; calcium-dependent protein kinase activity [GO:0010857]; calcium-dependent protein serine/threonine kinase activity [GO:0009931]; calmodulin binding [GO:0005516]; calmodulin-dependent protein kinase activity [GO:0004683]; protein serine/threonine kinase acti…
XLOC_033016	utg3915.10	utg3915|GWHAAAA00007183:44910-45772	CP_TkMS2	2.14217	0	-Inf	NA	5e-05	0.0104067	yes	KVH89775.1	AP2/ERF domain-containing protein [Cynara cardunculus var. scolymus]	Q40478	Ethylene-responsive transcription factor 5 (Ethylene-responsive element-binding factor 4) (EREBP-4) (Ethylene-responsive element-binding factor 5 homolog) (NtERF4)	GO:0003677; GO:0003700; GO:0005634; GO:0006351; GO:0006952; GO:0009873	nucleus [GO:0005634]; DNA binding [GO:0003677]; DNA binding transcription factor activity [GO:0003700]; defense response [GO:0006952]; ethylene-activated signaling pathway [GO:0009873]; transcription, DNA-templated [GO:0006351]
XLOC_033027	utg391.13	utg391|GWHAAAA00015186:46325-51141	CP_TkMS2	23.3188	132.071	2.50175	6.08365	5e-05	0.0104067	yes	XP_022009641.1	uncharacterized protein LOC110908948 [Helianthus annuus]	Q58353	Uncharacterized protein MJ0943	GO:0005886; GO:0016021	integral component of membrane [GO:0016021]; plasma membrane [GO:0005886]
XLOC_033091	utg3947.31	utg3947|GWHAAAA00005039:112859-113690	CP_TkMS2	64.9576	215.736	1.7317	3.99683	0.0002	0.0319514	yes	XP_022033195.1	auxin-responsive protein SAUR21-like [Helianthus annuus]	Q9FK62	Auxin-responsive protein SAUR24 (Protein SMALL AUXIN UP RNA 24)	GO:0005886; GO:0007275; GO:0009734; GO:0040008	plasma membrane [GO:0005886]; auxin-activated signaling pathway [GO:0009734]; multicellular organism development [GO:0007275]; regulation of growth [GO:0040008]
XLOC_033393	utg4050.10	utg4050|GWHAAAA00027406:33463-37189	CP_TkMS2	16.7233	2.13132	-2.97204	-6.40645	5e-05	0.0104067	yes	KVI05638.1	Ribonuclease CAF1 [Cynara cardunculus var. scolymus]	Q9FMS6	Probable CCR4-associated factor 1 homolog 11 (EC 3.1.13.4)	GO:0000289; GO:0000932; GO:0003723; GO:0004535; GO:0005634; GO:0006351; GO:0006355; GO:0008408; GO:0017148; GO:0030015; GO:0042742; GO:0043928; GO:0046872	CCR4-NOT core complex [GO:0030015]; nucleus [GO:0005634]; P-body [GO:0000932]; 3'-5' exonuclease activity [GO:0008408]; metal ion binding [GO:0046872]; poly(A)-specific ribonuclease activity [GO:0004535]; RNA binding [GO:0003723]; defense response to bacterium [GO:0042742]; exonucleolytic nuclear-transcribed mRNA catabolic process involved in deadenylation-dependent decay [GO:0043928]; negative r…
XLOC_033589	-	utg4130|GWHAAAA00030041:13318-14139	CP_TkMS2	2.88273	0	-Inf	NA	5e-05	0.0104067	yes	.	.	.	.	.	.
XLOC_033663	utg4170.2	utg4170|GWHAAAA00009072:12741-14499	CP_TkMS2	2.52652	0	-Inf	NA	5e-05	0.0104067	yes	AJF11719.1	WRKY53 [Chrysanthemum x morifolium]	Q8H0Y8	Probable WRKY transcription factor 41 (WRKY DNA-binding protein 41)	GO:0003700; GO:0005634; GO:0006351; GO:0043565	nucleus [GO:0005634]; DNA binding transcription factor activity [GO:0003700]; sequence-specific DNA binding [GO:0043565]; transcription, DNA-templated [GO:0006351]
XLOC_033664	utg4170.5	utg4170|GWHAAAA00009072:25664-27467	CP_TkMS2	0.822903	0	-Inf	NA	0.0002	0.0319514	yes	KVH90002.1	DNA-binding WRKY [Cynara cardunculus var. scolymus]	Q8H0Y8	Probable WRKY transcription factor 41 (WRKY DNA-binding protein 41)	GO:0003700; GO:0005634; GO:0006351; GO:0043565	nucleus [GO:0005634]; DNA binding transcription factor activity [GO:0003700]; sequence-specific DNA binding [GO:0043565]; transcription, DNA-templated [GO:0006351]
XLOC_033672	utg4171.11	utg4171|GWHAAAA00009005:53232-54513	CP_TkMS2	45.1193	4.73732	-3.2516	-7.57224	5e-05	0.0104067	yes	KVH97589.1	Protein of unknown function DUF4228 [Cynara cardunculus var. scolymus]	Q5QZ13	Asparagine--tRNA ligase (EC 6.1.1.22) (Asparaginyl-tRNA synthetase) (AsnRS)	GO:0003676; GO:0004816; GO:0005524; GO:0005737; GO:0006421	cytoplasm [GO:0005737]; asparagine-tRNA ligase activity [GO:0004816]; ATP binding [GO:0005524]; nucleic acid binding [GO:0003676]; asparaginyl-tRNA aminoacylation [GO:0006421]
XLOC_033678	utg4171.9	utg4171|GWHAAAA00009005:44907-46893	CP_TkMS2	0.843331	0	-Inf	NA	5e-05	0.0104067	yes	XP_021998560.1	vacuolar-sorting protein BRO1-like [Helianthus annuus]	F4HXZ1	Vacuolar-sorting protein BRO1 (BRO domain-containing protein 1) (AtBRO1)	GO:0005737; GO:0005770; GO:0005771; GO:0005829; GO:0007033; GO:0009506; GO:0015031; GO:0036257; GO:0043130; GO:0043621	cytoplasm [GO:0005737]; cytosol [GO:0005829]; late endosome [GO:0005770]; multivesicular body [GO:0005771]; plasmodesma [GO:0009506]; protein self-association [GO:0043621]; ubiquitin binding [GO:0043130]; multivesicular body organization [GO:0036257]; protein transport [GO:0015031]; vacuole organization [GO:0007033]
XLOC_033753	utg4202.2	utg4202|GWHAAAA00026804:27717-35924	CP_TkMS2	41.1721	6.06084	-2.76408	-5.90764	5e-05	0.0104067	yes	XP_022016910.1	zinc finger CCCH domain-containing protein 29-like [Helianthus annuus]	Q9XEE6	Zinc finger CCCH domain-containing protein 29 (AtC3H29) (AtSZF2)	GO:0003677; GO:0003700; GO:0005634; GO:0006355; GO:0009409; GO:0010200; GO:0046872; GO:0050832	nucleus [GO:0005634]; DNA binding [GO:0003677]; DNA binding transcription factor activity [GO:0003700]; metal ion binding [GO:0046872]; defense response to fungus [GO:0050832]; regulation of transcription, DNA-templated [GO:0006355]; response to chitin [GO:0010200]; response to cold [GO:0009409]
XLOC_033823	utg4229.1	utg4229|GWHAAAA00024730:6139-8365	CP_TkMS2	24.3161	6.90773	-1.81563	-4.41387	0.00015	0.0260779	yes	ACB56927.1	glycosyltransferase UGT95A1 [Pilosella officinarum]	Q40287	Anthocyanidin 3-O-glucosyltransferase 5 (EC 2.4.1.115) (Flavonol 3-O-glucosyltransferase 5) (UDP-glucose flavonoid 3-O-glucosyltransferase 5)	GO:0009718; GO:0047213	anthocyanidin 3-O-glucosyltransferase activity [GO:0047213]; anthocyanin-containing compound biosynthetic process [GO:0009718]
XLOC_034174	utg4323.13	utg4323|GWHAAAA00008941:75370-84699	CP_TkMS2	16.2616	54.5025	1.74485	4.20579	0.00015	0.0260779	yes	KVI08668.1	GDP dissociation inhibitor [Cynara cardunculus var. scolymus]	Q9LXC0	Guanosine nucleotide diphosphate dissociation inhibitor At5g09550 (AtGDI)	GO:0005093; GO:0005096; GO:0005622; GO:0007264; GO:0015031; GO:0048046	apoplast [GO:0048046]; intracellular [GO:0005622]; GTPase activator activity [GO:0005096]; Rab GDP-dissociation inhibitor activity [GO:0005093]; protein transport [GO:0015031]; small GTPase mediated signal transduction [GO:0007264]
XLOC_034174	utg4323.14	utg4323|GWHAAAA00008941:75370-84699	CP_TkMS2	16.2616	54.5025	1.74485	4.20579	0.00015	0.0260779	yes	XP_022005349.1	guanosine nucleotide diphosphate dissociation inhibitor At5g09550-like [Helianthus annuus]	Q9LXC0	Guanosine nucleotide diphosphate dissociation inhibitor At5g09550 (AtGDI)	GO:0005093; GO:0005096; GO:0005622; GO:0007264; GO:0015031; GO:0048046	apoplast [GO:0048046]; intracellular [GO:0005622]; GTPase activator activity [GO:0005096]; Rab GDP-dissociation inhibitor activity [GO:0005093]; protein transport [GO:0015031]; small GTPase mediated signal transduction [GO:0007264]
XLOC_034186	utg4327.6	utg4327|GWHAAAA00008730:23362-25089	CP_TkMS2	0.963549	0	-Inf	NA	5e-05	0.0104067	yes	XP_022028169.1	cytochrome P450 71B37-like [Helianthus annuus]	Q9LIP6	Cytochrome P450 71B34 (EC 1.14.-.-)	GO:0005506; GO:0016020; GO:0016021; GO:0016709; GO:0020037; GO:0044550	integral component of membrane [GO:0016021]; membrane [GO:0016020]; heme binding [GO:0020037]; iron ion binding [GO:0005506]; oxidoreductase activity, acting on paired donors, with incorporation or reduction of molecular oxygen, NAD(P)H as one donor, and incorporation of one atom of oxygen [GO:0016709]; secondary metabolite biosynthetic process [GO:0044550]
XLOC_034221	-	utg4340|GWHAAAA00017124:31796-35194	CP_TkMS2	1.93859	0	-Inf	NA	5e-05	0.0104067	yes	.	.	.	.	.	.
XLOC_035064	utg4652.9	utg4652|GWHAAAA00027091:38474-40605	CP_TkMS2	216.982	72.7668	-1.57622	-4.23763	0.00015	0.0260779	yes	KVH91277.1	3-Oxoacyl-[acyl-carrier-protein (ACP)] synthase III C-terminal [Cynara cardunculus var. scolymus]	O48780	3-ketoacyl-CoA synthase 11 (KCS-11) (EC 2.3.1.199) (Very long-chain fatty acid condensing enzyme 11) (VLCFA condensing enzyme 11)	GO:0006633; GO:0009409; GO:0009416; GO:0016021; GO:0102336; GO:0102337; GO:0102338; GO:0102756	integral component of membrane [GO:0016021]; 3-oxo-arachidoyl-CoA synthase activity [GO:0102336]; 3-oxo-cerotoyl-CoA synthase activity [GO:0102337]; 3-oxo-lignoceronyl-CoA synthase activity [GO:0102338]; very-long-chain 3-ketoacyl-CoA synthase activity [GO:0102756]; fatty acid biosynthetic process [GO:0006633]; response to cold [GO:0009409]; response to light stimulus [GO:0009416]
XLOC_035996	utg498.2	utg498|GWHAAAA00017535:11648-13723	CP_TkMS2	1.10592	0	-Inf	NA	5e-05	0.0104067	yes	KVI10248.1	No apical meristem (NAM) protein, partial [Cynara cardunculus var. scolymus]	Q9SK55	Transcription factor JUNGBRUNNEN 1 (NAC domain-containing protein 42) (ANAC042)	GO:0003677; GO:0003700; GO:0005634; GO:0005992; GO:0006351; GO:0006561; GO:0009718; GO:0010120; GO:0010150; GO:0042538; GO:1900056	nucleus [GO:0005634]; DNA binding [GO:0003677]; DNA binding transcription factor activity [GO:0003700]; anthocyanin-containing compound biosynthetic process [GO:0009718]; camalexin biosynthetic process [GO:0010120]; hyperosmotic salinity response [GO:0042538]; leaf senescence [GO:0010150]; negative regulation of leaf senescence [GO:1900056]; proline biosynthetic process [GO:0006561]; transcriptio…
XLOC_036086	utg5016.8	utg5016|GWHAAAA00022063:37513-39404	CP_TkMS2	33.6572	1.03897	-5.01768	-8.53698	0.00015	0.0260779	yes	XP_022024137.1	cytochrome P450 CYP82D47-like [Helianthus annuus]	Q9SZ46	Cytochrome P450 82C4 (EC 1.14.-.-)	GO:0004497; GO:0005506; GO:0016020; GO:0016021; GO:0016709; GO:0020037; GO:0044550; GO:0071281	integral component of membrane [GO:0016021]; membrane [GO:0016020]; heme binding [GO:0020037]; iron ion binding [GO:0005506]; monooxygenase activity [GO:0004497]; oxidoreductase activity, acting on paired donors, with incorporation or reduction of molecular oxygen, NAD(P)H as one donor, and incorporation of one atom of oxygen [GO:0016709]; cellular response to iron ion [GO:0071281]; secondary met…
XLOC_036426	utg5143.7	utg5143|GWHAAAA00023262:12135-13756	CP_TkMS2	1.06673	0	-Inf	NA	5e-05	0.0104067	yes	KVI03559.1	hypothetical protein Ccrd_018128 [Cynara cardunculus var. scolymus]	Q9SGS5	Uncharacterized protein At1g76070	GO:0005886	plasma membrane [GO:0005886]
XLOC_036594	utg51.33	utg51|GWHAAAA00009204:143268-145233	CP_TkMS2	17.8255	4.06363	-2.1331	-4.82113	0.0002	0.0319514	yes	XP_021989168.1	protein JINGUBANG-like [Helianthus annuus]	O48716	Protein JINGUBANG	GO:0005634; GO:0005737; GO:0009846	cytoplasm [GO:0005737]; nucleus [GO:0005634]; pollen germination [GO:0009846]
XLOC_036702	utg5248.1	utg5248|GWHAAAA00006708:650-4346	CP_TkMS2	47.0638	6.09885	-2.94801	-6.40972	5e-05	0.0104067	yes	KVI12111.1	Peptidyl-prolyl cis-trans isomerase, FKBP-type [Cynara cardunculus var. scolymus]	P04052	DNA-directed RNA polymerase II subunit RPB1 (RNA polymerase II subunit B1) (EC 2.7.7.6) (DNA-directed RNA polymerase III largest subunit)	GO:0003677; GO:0003899; GO:0005634; GO:0005665; GO:0005700; GO:0005703; GO:0006366; GO:0007095; GO:0046872	DNA-directed RNA polymerase II, core complex [GO:0005665]; nucleus [GO:0005634]; polytene chromosome [GO:0005700]; polytene chromosome puff [GO:0005703]; DNA binding [GO:0003677]; DNA-directed 5'-3' RNA polymerase activity [GO:0003899]; metal ion binding [GO:0046872]; mitotic G2 DNA damage checkpoint [GO:0007095]; transcription from RNA polymerase II promoter [GO:0006366]
XLOC_036861	utg5309.15	utg5309|GWHAAAA00002974:69076-72373	CP_TkMS2	11.5505	2.27225	-2.34576	-4.81573	0.00035	0.0487936	yes	ALD61639.1	Phe ammonia-lyase [Cichorium intybus]	P24481	Phenylalanine ammonia-lyase 1 (EC 4.3.1.24)	GO:0005737; GO:0006559; GO:0009800; GO:0016597; GO:0043234; GO:0045548	cytoplasm [GO:0005737]; protein complex [GO:0043234]; amino acid binding [GO:0016597]; phenylalanine ammonia-lyase activity [GO:0045548]; cinnamic acid biosynthetic process [GO:0009800]; L-phenylalanine catabolic process [GO:0006559]
XLOC_036986	-	utg5354|GWHAAAA00029538:14010-14261	CP_TkMS2	42.9362	0	-Inf	NA	5e-05	0.0104067	yes	.	.	.	.	.	.
XLOC_037164	utg5439.6	utg5439|GWHAAAA00004520:11511-14500	CP_TkMS2	10.2881	1.15615	-3.15358	-4.91215	0.0002	0.0319514	yes	KVI01529.1	Harbinger transposase-derived nuclease [Cynara cardunculus var. scolymus]	Q9M2U3	Protein ALP1-like (EC 3.1.-.-)	GO:0004518; GO:0005634; GO:0046872	nucleus [GO:0005634]; metal ion binding [GO:0046872]; nuclease activity [GO:0004518]
XLOC_037376	-	utg5501|GWHAAAA00000484:21731-22293	CP_TkMS2	3.97137	0	-Inf	NA	0.0001	0.0189455	yes	.	.	.	.	.	.
XLOC_037476	utg5527.1	utg5527|GWHAAAA00008311:5117-7557	CP_TkMS2	41.4382	11.9714	-1.79136	-3.91442	0.0001	0.0189455	yes	XP_021987808.1	delta-9 acyl-lipid desaturase 1-like [Helianthus annuus]	Q9FV68	Icosanoyl-CoA 5-desaturase (EC 1.14.19.10) (Delta(5) acyl-CoA desaturase) (Fragment)	GO:0006633; GO:0016021; GO:0016717	integral component of membrane [GO:0016021]; oxidoreductase activity, acting on paired donors, with oxidation of a pair of donors resulting in the reduction of molecular oxygen to two molecules of water [GO:0016717]; fatty acid biosynthetic process [GO:0006633]
XLOC_037530	utg554.6	utg554|GWHAAAA00014161:27763-28355	CP_TkMS2	62.7363	5.91432	-3.40701	-9.00276	5e-05	0.0104067	yes	KVH94839.1	hypothetical protein Ccrd_003091 [Cynara cardunculus var. scolymus]	Q1JPP8	Cyclin-dependent protein kinase inhibitor SMR4 (Protein SIAMESE-RELATED 4)	GO:0004860; GO:0007049	protein kinase inhibitor activity [GO:0004860]; cell cycle [GO:0007049]
XLOC_037576	utg5575.6	utg5575|GWHAAAA00025056:24456-29058	CP_TkMS2	63.0266	12.9366	-2.2845	-5.02901	5e-05	0.0104067	yes	KVI00467.1	Carbohydrate kinase PfkB [Cynara cardunculus var. scolymus]	Q42896	Fructokinase-2 (EC 2.7.1.4)	GO:0005524; GO:0008865; GO:0019252	ATP binding [GO:0005524]; fructokinase activity [GO:0008865]; starch biosynthetic process [GO:0019252]
XLOC_037927	utg5711.2	utg5711|GWHAAAA00015732:17440-18631	CP_TkMS2	158.431	45.9476	-1.7858	-5.34112	5e-05	0.0104067	yes	ACF15449.1	dehydrin 2 [Cichorium intybus]	P25863	Dehydrin Xero 1	GO:0005829; GO:0009414; GO:0009631; GO:0009737	cytosol [GO:0005829]; cold acclimation [GO:0009631]; response to abscisic acid [GO:0009737]; response to water deprivation [GO:0009414]
XLOC_038025	utg5754.1	utg5754|GWHAAAA00023085:1855-5715	CP_TkMS2	1.18759	0	-Inf	NA	5e-05	0.0104067	yes	OTG27298.1	putative NB-ARC [Helianthus annuus]	Q9FI14	Disease resistance protein TAO1 (Protein TARGET OF AVRB OPERATION 1)	GO:0005524; GO:0007165; GO:0009816; GO:0042742; GO:0043531	ADP binding [GO:0043531]; ATP binding [GO:0005524]; defense response to bacterium [GO:0042742]; defense response to bacterium, incompatible interaction [GO:0009816]; signal transduction [GO:0007165]
XLOC_038163	utg5825.24	utg5825|GWHAAAA00009077:106026-112215	CP_TkMS2	3.07858	0	-Inf	NA	5e-05	0.0104067	yes	WP_015612532.1	MULTISPECIES: LacI family transcriptional regulator [Streptomyces]	P27816	Microtubule-associated protein 4 (MAP-4)	GO:0003723; GO:0005198; GO:0005874; GO:0005875; GO:0005930; GO:0007052; GO:0008017; GO:0014069; GO:0031175; GO:0043005; GO:0051012; GO:0051294; GO:0051301; GO:0070062; GO:0072686; GO:1902856	axoneme [GO:0005930]; extracellular exosome [GO:0070062]; microtubule [GO:0005874]; microtubule associated complex [GO:0005875]; mitotic spindle [GO:0072686]; neuron projection [GO:0043005]; postsynaptic density [GO:0014069]; microtubule binding [GO:0008017]; RNA binding [GO:0003723]; structural molecule activity [GO:0005198]; cell division [GO:0051301]; establishment of spindle orientation [GO:0…
XLOC_038279	-	utg588|GWHAAAA00002683:37520-39543	CP_TkMS2	19.6576	2.78433	-2.81968	-5.18868	5e-05	0.0104067	yes	.	.	.	.	.	.
XLOC_038403	utg5952.5	utg5952|GWHAAAA00010921:12039-13884	CP_TkMS2	27.5449	1.2743	-4.43401	-8.00571	5e-05	0.0104067	yes	KVH93992.1	Harbinger transposase-derived nuclease [Cynara cardunculus var. scolymus]	Q94K49	Protein ANTAGONIST OF LIKE HETEROCHROMATIN PROTEIN 1 (EC 3.1.-.-)	GO:0003682; GO:0004518; GO:0005634; GO:0006351; GO:0031936; GO:0035098; GO:0035102; GO:0046872	ESC/E(Z) complex [GO:0035098]; nucleus [GO:0005634]; PRC1 complex [GO:0035102]; chromatin binding [GO:0003682]; metal ion binding [GO:0046872]; nuclease activity [GO:0004518]; negative regulation of chromatin silencing [GO:0031936]; transcription, DNA-templated [GO:0006351]
XLOC_038516	-	utg5983|GWHAAAA00009012:25657-27047	CP_TkMS2	0.929782	0	-Inf	NA	0.0003	0.0428333	yes	.	.	.	.	.	.
XLOC_038559	utg5995.18	utg5995|GWHAAAA00008237:86822-87905	CP_TkMS2	26.8342	4.3528	-2.62406	-5.91819	0.00015	0.0260779	yes	KVH89692.1	hypothetical protein Ccrd_008314 [Cynara cardunculus var. scolymus]	Q8U064	Glutamate--tRNA ligase (EC 6.1.1.17) (Glutamyl-tRNA synthetase) (GluRS)	GO:0004818; GO:0005524; GO:0005737; GO:0006424	cytoplasm [GO:0005737]; ATP binding [GO:0005524]; glutamate-tRNA ligase activity [GO:0004818]; glutamyl-tRNA aminoacylation [GO:0006424]
XLOC_039811	utg6595.43	utg6595|GWHAAAA00007766:165656-167825	CP_TkMS2	1.33439	0	-Inf	NA	5e-05	0.0104067	yes	OTF98158.1	putative DNA mismatch repair protein family [Helianthus annuus]	F4JN26	DNA mismatch repair protein MLH3 (MutL protein homolog 3)	GO:0000795; GO:0003697; GO:0005524; GO:0005694; GO:0005712; GO:0006298; GO:0007131; GO:0016887; GO:0030983; GO:0032300	chiasma [GO:0005712]; chromosome [GO:0005694]; mismatch repair complex [GO:0032300]; synaptonemal complex [GO:0000795]; ATP binding [GO:0005524]; ATPase activity [GO:0016887]; mismatched DNA binding [GO:0030983]; single-stranded DNA binding [GO:0003697]; mismatch repair [GO:0006298]; reciprocal meiotic recombination [GO:0007131]
XLOC_039985	-	utg6685|GWHAAAA00011766:116448-122946	CP_TkMS2	1.18368	0	-Inf	NA	0.0003	0.0428333	yes	.	.	.	.	.	.
XLOC_040235	utg6815.1	utg6815|GWHAAAA00012957:3865-5839	CP_TkMS2	281.707	47.0178	-2.58292	-6.96498	5e-05	0.0104067	yes	KVH95418.1	Aminotransferase, class I/classII [Cynara cardunculus var. scolymus]	P31531	1-aminocyclopropane-1-carboxylate synthase (ACC synthase) (EC 4.4.1.14) (S-adenosyl-L-methionine methylthioadenosine-lyase)	GO:0009693; GO:0009835; GO:0016847; GO:0030170	1-aminocyclopropane-1-carboxylate synthase activity [GO:0016847]; pyridoxal phosphate binding [GO:0030170]; ethylene biosynthetic process [GO:0009693]; fruit ripening [GO:0009835]
XLOC_040292	utg6838.1	utg6838|GWHAAAA00002190:3886-5245	CP_TkMS2	381.404	113.878	-1.74383	-6.06388	5e-05	0.0104067	yes	KVI10225.1	hypothetical protein Ccrd_011345 [Cynara cardunculus var. scolymus]	Q8LCL8	Cysteine-rich and transmembrane domain-containing protein B	GO:0003006; GO:0005886; GO:0016021	integral component of membrane [GO:0016021]; plasma membrane [GO:0005886]; developmental process involved in reproduction [GO:0003006]
XLOC_040339	utg6855.7	utg6855|GWHAAAA00001094:62635-64559	CP_TkMS2	0.857292	0	-Inf	NA	5e-05	0.0104067	yes	KVI12386.1	cytochrome P450 [Cynara cardunculus var. scolymus]	O81117	Cytochrome P450 94A1 (EC 1.14.-.-) (P450-dependent fatty acid omega-hydroxylase)	GO:0004497; GO:0005506; GO:0005789; GO:0016021; GO:0016705; GO:0020037	endoplasmic reticulum membrane [GO:0005789]; integral component of membrane [GO:0016021]; heme binding [GO:0020037]; iron ion binding [GO:0005506]; monooxygenase activity [GO:0004497]; oxidoreductase activity, acting on paired donors, with incorporation or reduction of molecular oxygen [GO:0016705]
XLOC_040778	utg6996.8	utg6996|GWHAAAA00001571:51629-53312	CP_TkMS2	1.71948	0	-Inf	NA	5e-05	0.0104067	yes	WP_077391582.1	2-hydroxyacyl-CoA dehydratase [Mobilibacterium timonense]	F2JXJ3	L-lysine 6-oxidase (EC 1.4.3.20) (L-lysine-epsilon-oxidase) (Marinocine)	GO:0005576; GO:0031640; GO:0033736; GO:0042742; GO:0048038; GO:1900191	extracellular region [GO:0005576]; L-lysine 6-oxidase activity [GO:0033736]; quinone binding [GO:0048038]; defense response to bacterium [GO:0042742]; killing of cells of other organism [GO:0031640]; negative regulation of single-species biofilm formation [GO:1900191]
XLOC_041163	-	utg7190|GWHAAAA00028194:16864-19582	CP_TkMS2	2.4537	10.0134	2.0289	3.82353	0.0003	0.0428333	yes	.	.	.	.	.	.
XLOC_041296	utg7251.27	utg7251|GWHAAAA00004300:125497-127562	CP_TkMS2	81.04	8.15989	-3.31201	-8.22582	5e-05	0.0104067	yes	KVH98616.1	hypothetical protein Ccrd_023165 [Cynara cardunculus var. scolymus]	A2Z9A6	UPF0496 protein 4	GO:0016021	integral component of membrane [GO:0016021]
XLOC_041510	utg7327.31	utg7327|GWHAAAA00008735:165861-168898	CP_TkMS2	12.4422	1.63232	-2.93024	-5.55459	5e-05	0.0104067	yes	KVH97260.1	Aminotransferase, class I/classII [Cynara cardunculus var. scolymus]	Q07262	1-aminocyclopropane-1-carboxylate synthase (ACC synthase) (EC 4.4.1.14) (S-adenosyl-L-methionine methylthioadenosine-lyase)	GO:0009693; GO:0009835; GO:0016847; GO:0030170	1-aminocyclopropane-1-carboxylate synthase activity [GO:0016847]; pyridoxal phosphate binding [GO:0030170]; ethylene biosynthetic process [GO:0009693]; fruit ripening [GO:0009835]
XLOC_042753	utg7873.9	utg7873|GWHAAAA00011980:42271-47227	CP_TkMS2	10.8412	1.7964	-2.59334	-5.11217	5e-05	0.0104067	yes	XP_022039704.1	two-pore potassium channel 1-like [Helianthus annuus]	Q8LBL1	Two-pore potassium channel 1 (AtTPK1) (Calcium-activated outward-rectifying potassium channel 1) (AtKCO1)	GO:0005216; GO:0005774; GO:0005887; GO:0009705; GO:0010029; GO:0010119; GO:0022841; GO:0030007; GO:0030322; GO:0046872; GO:0051260	integral component of plasma membrane [GO:0005887]; plant-type vacuole membrane [GO:0009705]; vacuolar membrane [GO:0005774]; ion channel activity [GO:0005216]; metal ion binding [GO:0046872]; potassium ion leak channel activity [GO:0022841]; cellular potassium ion homeostasis [GO:0030007]; protein homooligomerization [GO:0051260]; regulation of seed germination [GO:0010029]; regulation of stomat…
XLOC_043161	utg8056.7	utg8056|GWHAAAA00009736:31854-34686	CP_TkMS2	248.824	72.5287	-1.7785	-4.1997	5e-05	0.0104067	yes	KVH92730.1	No apical meristem (NAM) protein [Cynara cardunculus var. scolymus]	Q39013	NAC domain-containing protein 2 (ANAC002)	GO:0003677; GO:0003700; GO:0005634; GO:0006351; GO:0009611; GO:0009788	nucleus [GO:0005634]; DNA binding [GO:0003677]; DNA binding transcription factor activity [GO:0003700]; negative regulation of abscisic acid-activated signaling pathway [GO:0009788]; response to wounding [GO:0009611]; transcription, DNA-templated [GO:0006351]
XLOC_044167	utg8511.9	utg8511|GWHAAAA00008951:25305-26305	CP_TkMS2	27.5684	88.3545	1.68029	5.00396	0.0002	0.0319514	yes	XP_022023925.1	classical arabinogalactan protein 7-like [Helianthus annuus]	Q9LY91	Classical arabinogalactan protein 6	GO:0005886; GO:0009860; GO:0010208; GO:0031012; GO:0031225	anchored component of membrane [GO:0031225]; extracellular matrix [GO:0031012]; plasma membrane [GO:0005886]; pollen tube growth [GO:0009860]; pollen wall assembly [GO:0010208]
XLOC_044756	utg8761.15	utg8761|GWHAAAA00002625:82180-83588	CP_TkMS2	34.4641	7.64447	-2.17261	-5.42762	5e-05	0.0104067	yes	XP_010274414.1	PREDICTED: uncharacterized protein LOC104609737 [Nelumbo nucifera]	Q47BA9	UPF0758 protein Daro_3142	GO:0008237; GO:0046872	metal ion binding [GO:0046872]; metallopeptidase activity [GO:0008237]
XLOC_044781	utg8777.13	utg8777|GWHAAAA00020722:84156-86370	CP_TkMS2	79.9002	21.3883	-1.90138	-5.34891	5e-05	0.0104067	yes	KVI02750.1	Helix-turn-helix motif-containing protein [Cynara cardunculus var. scolymus]	O23208	Homeobox-leucine zipper protein ATHB-40 (HD-ZIP protein ATHB-40) (Homeodomain transcription factor ATHB-40)	GO:0003700; GO:0005634; GO:0006351; GO:0009733; GO:0043565	nucleus [GO:0005634]; DNA binding transcription factor activity [GO:0003700]; sequence-specific DNA binding [GO:0043565]; response to auxin [GO:0009733]; transcription, DNA-templated [GO:0006351]
XLOC_044955	-	utg8862|GWHAAAA00005803:21657-25431	CP_TkMS2	1.18932	0	-Inf	NA	5e-05	0.0104067	yes	.	.	.	.	.	.
XLOC_044998	utg8887.13	utg8887|GWHAAAA00004368:61789-63720	CP_TkMS2	65.7548	14.5101	-2.18004	-5.6746	5e-05	0.0104067	yes	KVH92741.1	AAA+ ATPase domain-containing protein [Cynara cardunculus var. scolymus]	Q9FLD5	AAA-ATPase ASD, mitochondrial (EC 3.6.1.3) (AAA-ATPase 1) (Protein ATPASE-IN-SEED-DEVELOPMENT)	GO:0005524; GO:0005739; GO:0005783; GO:0009409; GO:0009414; GO:0009651; GO:0009737; GO:0010154; GO:0010431; GO:0016021; GO:0016887; GO:0031966	endoplasmic reticulum [GO:0005783]; integral component of membrane [GO:0016021]; mitochondrial membrane [GO:0031966]; mitochondrion [GO:0005739]; ATP binding [GO:0005524]; ATPase activity [GO:0016887]; fruit development [GO:0010154]; response to abscisic acid [GO:0009737]; response to cold [GO:0009409]; response to salt stress [GO:0009651]; response to water deprivation [GO:0009414]; seed maturat…
XLOC_045030	utg8896.9	utg8896|GWHAAAA00030361:26525-28472	CP_TkMS2	34.6576	11.4645	-1.596	-4.06895	0.0003	0.0428333	yes	OTG18496.1	putative zinc finger, RING/FYVE/PHD-type [Helianthus annuus]	Q7XLY8	E3 ubiquitin-protein ligase Os04g0590900 (EC 2.3.2.27) (RING-H2 finger protein Os04g0590900) (RING-type E3 ubiquitin transferase Os04g0590900)	GO:0004842; GO:0016021; GO:0016567; GO:0043161; GO:0046872; GO:0061630	integral component of membrane [GO:0016021]; metal ion binding [GO:0046872]; ubiquitin protein ligase activity [GO:0061630]; ubiquitin-protein transferase activity [GO:0004842]; proteasome-mediated ubiquitin-dependent protein catabolic process [GO:0043161]; protein ubiquitination [GO:0016567]
XLOC_045033	utg8896.7	utg8896|GWHAAAA00030361:19663-20496	CP_TkMS2	62.0502	7.95369	-2.96374	-7.80081	0.0001	0.0189455	yes	WP_014945432.1	hypothetical protein [Chlamydia psittaci]	Q6MJ09	DNA-directed RNA polymerase subunit beta (RNAP subunit beta) (EC 2.7.7.6) (RNA polymerase subunit beta) (Transcriptase subunit beta)	GO:0003677; GO:0003899; GO:0006351; GO:0032549	DNA binding [GO:0003677]; DNA-directed 5'-3' RNA polymerase activity [GO:0003899]; ribonucleoside binding [GO:0032549]; transcription, DNA-templated [GO:0006351]
XLOC_045088	utg8925.11	utg8925|GWHAAAA00020888:16582-17198	CP_TkMS2	0	4.3452	Inf	NA	5e-05	0.0104067	yes	.	.	P38749	AP-1-like transcription factor YAP3	GO:0003677; GO:0003700; GO:0005634; GO:0005737; GO:0006351; GO:0006357	cytoplasm [GO:0005737]; nucleus [GO:0005634]; DNA binding [GO:0003677]; DNA binding transcription factor activity [GO:0003700]; regulation of transcription from RNA polymerase II promoter [GO:0006357]; transcription, DNA-templated [GO:0006351]
XLOC_045200	utg896.5	utg896|GWHAAAA00020869:24702-26608	CP_TkMS2	99.4307	2.75383	-5.17418	-11.0167	5e-05	0.0104067	yes	XP_021974115.1	probable protein phosphatase 2C 25 [Helianthus annuus]	O80871	Probable protein phosphatase 2C 25 (AtPP2C25) (EC 3.1.3.16) (Protein phosphatase AP2C1)	GO:0004722; GO:0005634; GO:0009536; GO:0009611; GO:0009620; GO:0009738; GO:0046872; GO:0050832	nucleus [GO:0005634]; plastid [GO:0009536]; metal ion binding [GO:0046872]; protein serine/threonine phosphatase activity [GO:0004722]; abscisic acid-activated signaling pathway [GO:0009738]; defense response to fungus [GO:0050832]; response to fungus [GO:0009620]; response to wounding [GO:0009611]
XLOC_045315	utg9008.17	utg9008|GWHAAAA00005937:60593-62803	CP_TkMS2	30.2715	97.8593	1.69275	4.65282	5e-05	0.0104067	yes	OAY74597.1	Thiol protease [Ananas comosus]	Q9FGR9	KDEL-tailed cysteine endopeptidase CEP1 (EC 3.4.22.-) (Cysteine proteinase CP56) (AtCP56)	GO:0000325; GO:0004197; GO:0005615; GO:0005764; GO:0005783; GO:0009505; GO:0009555; GO:0009626; GO:0010623; GO:0048658; GO:0050832; GO:0051603	endoplasmic reticulum [GO:0005783]; extracellular space [GO:0005615]; lysosome [GO:0005764]; plant-type cell wall [GO:0009505]; plant-type vacuole [GO:0000325]; cysteine-type endopeptidase activity [GO:0004197]; anther wall tapetum development [GO:0048658]; defense response to fungus [GO:0050832]; plant-type hypersensitive response [GO:0009626]; pollen development [GO:0009555]; programmed cell de…
XLOC_046003	utg9310.12	utg9310|GWHAAAA00005938:51440-52226	CP_TkMS2	2.38898	0	-Inf	NA	5e-05	0.0104067	yes	XP_021977841.1	exocyst complex component EXO70B1 [Helianthus annuus]	Q9FGH9	Exocyst complex component EXO70B1 (AtExo70b1) (Exocyst subunit Exo70 family protein B1)	GO:0000145; GO:0005829; GO:0005886; GO:0006887; GO:0009414; GO:0009789; GO:0012505; GO:0042742; GO:0045335; GO:0050832; GO:0070062; GO:0090333	cytosol [GO:0005829]; endomembrane system [GO:0012505]; exocyst [GO:0000145]; extracellular exosome [GO:0070062]; phagocytic vesicle [GO:0045335]; plasma membrane [GO:0005886]; defense response to bacterium [GO:0042742]; defense response to fungus [GO:0050832]; exocytosis [GO:0006887]; positive regulation of abscisic acid-activated signaling pathway [GO:0009789]; regulation of stomatal closure [G…
XLOC_046035	utg9325.8	utg9325|GWHAAAA00024424:49519-51290	CP_TkMS2	23.4842	1.24078	-4.24237	-7.54148	0.0002	0.0319514	yes	XP_022027167.1	protein ANTAGONIST OF LIKE HETEROCHROMATIN PROTEIN 1-like [Helianthus annuus]	Q94K49	Protein ANTAGONIST OF LIKE HETEROCHROMATIN PROTEIN 1 (EC 3.1.-.-)	GO:0003682; GO:0004518; GO:0005634; GO:0006351; GO:0031936; GO:0035098; GO:0035102; GO:0046872	ESC/E(Z) complex [GO:0035098]; nucleus [GO:0005634]; PRC1 complex [GO:0035102]; chromatin binding [GO:0003682]; metal ion binding [GO:0046872]; nuclease activity [GO:0004518]; negative regulation of chromatin silencing [GO:0031936]; transcription, DNA-templated [GO:0006351]
XLOC_046375	utg94.2	utg94|GWHAAAA00006407:20632-21807	CP_TkMS2	1.42264	0	-Inf	NA	5e-05	0.0104067	yes	XP_002626153.1	predicted protein [Blastomyces gilchristii SLH14081]	Q4FZ76	Reticulon-2 (xRTN2)	GO:0005783; GO:0005789; GO:0016021	endoplasmic reticulum [GO:0005783]; endoplasmic reticulum membrane [GO:0005789]; integral component of membrane [GO:0016021]
XLOC_046668	utg9689.24	utg9689|GWHAAAA00019922:107098-108035	CP_TkMS2	3.94585	0	-Inf	NA	5e-05	0.0104067	yes	GAV82523.1	DUF4228 domain-containing protein [Cephalotus follicularis]	A6QLU7	TRPM8 channel-associated factor 2 (TRP channel-associated factor 2)	GO:0005886	plasma membrane [GO:0005886]
XLOC_047150	utg9952.1	utg9952|GWHAAAA00003337:15368-21086	CP_TkMS2	110.372	18.2248	-2.5984	-6.00422	5e-05	0.0104067	yes	XP_021992462.1	calcium-transporting ATPase 2, plasma membrane-type-like isoform X1 [Helianthus annuus]	O81108	Calcium-transporting ATPase 2, plasma membrane-type (EC 3.6.3.8) (Ca(2+)-ATPase isoform 2)	GO:0005388; GO:0005516; GO:0005524; GO:0005783; GO:0005789; GO:0005886; GO:0005887; GO:0006810; GO:0015085; GO:0016020; GO:0046872	endoplasmic reticulum [GO:0005783]; endoplasmic reticulum membrane [GO:0005789]; integral component of plasma membrane [GO:0005887]; membrane [GO:0016020]; plasma membrane [GO:0005886]; ATP binding [GO:0005524]; calcium ion transmembrane transporter activity [GO:0015085]; calcium-transporting ATPase activity [GO:0005388]; calmodulin binding [GO:0005516]; metal ion binding [GO:0046872]; transport …
XLOC_047164	utg995.9	utg995|GWHAAAA00005171:35411-37332	CP_TkMS2	96.5152	29.6755	-1.70148	-5.1001	0.00015	0.0260779	yes	KVI04244.1	Zinc finger, RING/FYVE/PHD-type [Cynara cardunculus var. scolymus]	Q6R567	E3 ubiquitin-protein ligase RMA1H1 (EC 2.3.2.27) (Protein RING membrane-anchor 1 homolog 1) (RING-type E3 ubiquitin transferase RMA1H1)	GO:0004842; GO:0005789; GO:0006970; GO:0009409; GO:0009414; GO:0009611; GO:0009723; GO:0016021; GO:0016567; GO:0043161; GO:0046872	endoplasmic reticulum membrane [GO:0005789]; integral component of membrane [GO:0016021]; metal ion binding [GO:0046872]; ubiquitin-protein transferase activity [GO:0004842]; proteasome-mediated ubiquitin-dependent protein catabolic process [GO:0043161]; protein ubiquitination [GO:0016567]; response to cold [GO:0009409]; response to ethylene [GO:0009723]; response to osmotic stress [GO:0006970]; …
XLOC_000346	utg10168.8	utg10168|GWHAAAA00009154:40266-41924	CP_TkMS3	40.7244	9.76095	-2.0608	-5.12332	5e-05	0.0199376	yes	GAX22408.1	hypothetical protein FisN_14Hh021 [Fistulifera solaris]	.	.	.	.
XLOC_001458	utg10727.3	utg10727|GWHAAAA00011989:21730-23649	CP_TkMS3	45.6271	11.2541	-2.01944	-4.87334	5e-05	0.0199376	yes	KVH92521.1	Protein kinase, ATP binding site-containing protein [Cynara cardunculus var. scolymus]	O80888	Mitogen-activated protein kinase kinase kinase 17 (EC 2.7.11.25)	GO:0004674; GO:0004702; GO:0004709; GO:0005524; GO:0005634; GO:0005737; GO:0006970; GO:0007346; GO:0009737; GO:0009738; GO:0023014; GO:0031098; GO:0032147	cytoplasm [GO:0005737]; nucleus [GO:0005634]; ATP binding [GO:0005524]; MAP kinase kinase kinase activity [GO:0004709]; protein serine/threonine kinase activity [GO:0004674]; signal transducer, downstream of receptor, with serine/threonine kinase activity [GO:0004702]; abscisic acid-activated signaling pathway [GO:0009738]; activation of protein kinase activity [GO:0032147]; regulation of mitotic…
XLOC_001487	utg10749.1	utg10749|GWHAAAA00029736:306-4081	CP_TkMS3	82.661	629.241	2.92834	5.73109	5e-05	0.0199376	yes	KVI01498.1	Alpha crystallin/Hsp20 domain-containing protein [Cynara cardunculus var. scolymus]	P46516	17.9 kDa class II heat shock protein	GO:0005737	cytoplasm [GO:0005737]
XLOC_001487	utg10749.2	utg10749|GWHAAAA00029736:306-4081	CP_TkMS3	82.661	629.241	2.92834	5.73109	5e-05	0.0199376	yes	KVI01498.1	Alpha crystallin/Hsp20 domain-containing protein [Cynara cardunculus var. scolymus]	P46516	17.9 kDa class II heat shock protein	GO:0005737	cytoplasm [GO:0005737]
XLOC_002074	utg11070.21	utg11070|GWHAAAA00009092:119328-123876	CP_TkMS3	51.5831	12.4312	-2.05293	-4.22717	0.0001	0.0342364	yes	OAY81871.1	Auxin response factor 16 [Ananas comosus]	Q8RYC8	Auxin response factor 19 (Auxin-responsive protein IAA22)	GO:0003677; GO:0003700; GO:0005634; GO:0006351; GO:0009723; GO:0009733; GO:0009734; GO:0010311; GO:0043565; GO:0046983; GO:0048366; GO:0048527	nucleus [GO:0005634]; DNA binding [GO:0003677]; DNA binding transcription factor activity [GO:0003700]; protein dimerization activity [GO:0046983]; sequence-specific DNA binding [GO:0043565]; auxin-activated signaling pathway [GO:0009734]; lateral root development [GO:0048527]; lateral root formation [GO:0010311]; leaf development [GO:0048366]; response to auxin [GO:0009733]; response to ethylene…
XLOC_002697	utg11403.13	utg11403|GWHAAAA00007417:56078-57084	CP_TkMS3	74.5094	2.93372	-4.66662	-10.7636	5e-05	0.0199376	yes	KVI01950.1	AP2/ERF domain-containing protein [Cynara cardunculus var. scolymus]	Q9SZ06	Ethylene-responsive transcription factor ERF109	GO:0003677; GO:0003700; GO:0005634; GO:0006351; GO:0009873; GO:0010087; GO:0010200; GO:0050832; GO:0051301	nucleus [GO:0005634]; DNA binding [GO:0003677]; DNA binding transcription factor activity [GO:0003700]; cell division [GO:0051301]; defense response to fungus [GO:0050832]; ethylene-activated signaling pathway [GO:0009873]; phloem or xylem histogenesis [GO:0010087]; response to chitin [GO:0010200]; transcription, DNA-templated [GO:0006351]
XLOC_002699	utg11404.6	utg11404|GWHAAAA00007346:36766-39543	CP_TkMS3	15.6224	1.93096	-3.01623	-6.3531	5e-05	0.0199376	yes	BAG12743.1	ABA 8-oxidase [Lactuca sativa]	Q949P1	Abscisic acid 8'-hydroxylase 1 (ABA 8'-hydroxylase 1) (EC 1.14.13.93) (Cytochrome P450 707A1)	GO:0005506; GO:0010268; GO:0010295; GO:0016021; GO:0016125; GO:0016132; GO:0020037; GO:0046345	integral component of membrane [GO:0016021]; (+)-abscisic acid 8'-hydroxylase activity [GO:0010295]; heme binding [GO:0020037]; iron ion binding [GO:0005506]; abscisic acid catabolic process [GO:0046345]; brassinosteroid biosynthetic process [GO:0016132]; brassinosteroid homeostasis [GO:0010268]; sterol metabolic process [GO:0016125]
XLOC_002821	utg1145.2	utg1145|GWHAAAA00014302:4905-9081	CP_TkMS3	9.25324	124.904	3.75471	8.03718	5e-05	0.0199376	yes	XP_021969277.1	BAG family molecular chaperone regulator 6 isoform X1 [Helianthus annuus]	O65373	BAG family molecular chaperone regulator 5, mitochondrial (Bcl-2-associated athanogene 5)	GO:0005516; GO:0005739; GO:0006457; GO:0009266; GO:0009506; GO:0043207; GO:0051087	mitochondrion [GO:0005739]; plasmodesma [GO:0009506]; calmodulin binding [GO:0005516]; chaperone binding [GO:0051087]; protein folding [GO:0006457]; response to external biotic stimulus [GO:0043207]; response to temperature stimulus [GO:0009266]
XLOC_003443	utg11780.4	utg11780|GWHAAAA00022400:14874-16355	CP_TkMS3	6.30993	43.9029	2.79862	7.35887	5e-05	0.0199376	yes	KVH91948.1	Alpha crystallin/Hsp20 domain-containing protein [Cynara cardunculus var. scolymus]	Q96331	23.6 kDa heat shock protein, mitochondrial (AtHsp23.6)	GO:0005739; GO:0046686	mitochondrion [GO:0005739]; response to cadmium ion [GO:0046686]
XLOC_003566	utg11847.4	utg11847|GWHAAAA00008477:18932-21939	CP_TkMS3	8.31131	1.73071	-2.26371	-4.22723	5e-05	0.0199376	yes	XP_021982693.1	nudix hydrolase 17, mitochondrial-like [Helianthus annuus]	Q9ZU95	Nudix hydrolase 17, mitochondrial (AtNUDT17) (EC 3.6.1.-)	GO:0005634; GO:0005737; GO:0005739; GO:0016818; GO:0046872	cytoplasm [GO:0005737]; mitochondrion [GO:0005739]; nucleus [GO:0005634]; hydrolase activity, acting on acid anhydrides, in phosphorus-containing anhydrides [GO:0016818]; metal ion binding [GO:0046872]
XLOC_003895	utg12035.4	utg12035|GWHAAAA00006723:17238-19408	CP_TkMS3	20.2859	2.45498	-3.04669	-6.62502	5e-05	0.0199376	yes	XP_022012230.1	vignain-like [Helianthus annuus]	P25803	Vignain (EC 3.4.22.-) (Bean endopeptidase) (Cysteine proteinase EP-C1)	GO:0005788; GO:0008234	endoplasmic reticulum lumen [GO:0005788]; cysteine-type peptidase activity [GO:0008234]
XLOC_004602	utg12494.4	utg12494|GWHAAAA00016949:22781-26745	CP_TkMS3	4.33074	65.6671	3.92249	7.91885	5e-05	0.0199376	yes	XP_021983848.1	chaperone protein ClpB1-like [Helianthus annuus]	P42730	Chaperone protein ClpB1 (ATP-dependent Clp protease ATP-binding subunit ClpB homolog 1) (Casein lytic proteinase B1) (Heat shock protein 101) (Protein DEFECTIVE IN LONG-TERM ACQUIRED THERMOTOLERANCE)	GO:0005524; GO:0005634; GO:0005829; GO:0009408; GO:0009570; GO:0009644; GO:0009941; GO:0019538; GO:0042542; GO:0043335; GO:0045727	chloroplast envelope [GO:0009941]; chloroplast stroma [GO:0009570]; cytosol [GO:0005829]; nucleus [GO:0005634]; ATP binding [GO:0005524]; positive regulation of translation [GO:0045727]; protein metabolic process [GO:0019538]; protein unfolding [GO:0043335]; response to heat [GO:0009408]; response to high light intensity [GO:0009644]; response to hydrogen peroxide [GO:0042542]
XLOC_004674	utg1251.21	utg1251|GWHAAAA00016784:70766-71641	CP_TkMS3	4.5039	65.719	3.86707	6.97659	5e-05	0.0199376	yes	XP_004505963.1	PREDICTED: 17.3 kDa class I heat shock protein-like [Cicer arietinum]	P02519	17.3 kDa class I heat shock protein (HSP 17.3)	GO:0005737	cytoplasm [GO:0005737]
XLOC_004675	utg1251.23	utg1251|GWHAAAA00016784:75769-76986	CP_TkMS3	78.6725	487.246	2.63072	5.14434	5e-05	0.0199376	yes	XP_015873917.1	PREDICTED: 18.5 kDa class I heat shock protein-like [Ziziphus jujuba]	P02519	17.3 kDa class I heat shock protein (HSP 17.3)	GO:0005737	cytoplasm [GO:0005737]
XLOC_004676	utg1251.24	utg1251|GWHAAAA00016784:79370-80442	CP_TkMS3	14.5202	101.647	2.80744	7.49799	5e-05	0.0199376	yes	XP_015873917.1	PREDICTED: 18.5 kDa class I heat shock protein-like [Ziziphus jujuba]	P02519	17.3 kDa class I heat shock protein (HSP 17.3)	GO:0005737	cytoplasm [GO:0005737]
XLOC_004704	utg12536.15	utg12536|GWHAAAA00024432:54295-56862	CP_TkMS3	24.2891	323.484	3.73531	6.98268	5e-05	0.0199376	yes	XP_021771057.1	probable mediator of RNA polymerase II transcription subunit 37c [Chenopodium quinoa]	Q9LHA8	Probable mediator of RNA polymerase II transcription subunit 37c (Heat shock 70 kDa protein 4) (Heat shock cognate 70 kDa protein 4) (Heat shock cognate protein 70-4) (AtHsc70-4) (Heat shock protein 70-4) (AtHsp70-4)	GO:0005524; GO:0005618; GO:0005634; GO:0005739; GO:0005774; GO:0005794; GO:0005829; GO:0005886; GO:0006351; GO:0006355; GO:0009266; GO:0009408; GO:0009615; GO:0009617; GO:0009644; GO:0016567; GO:0031625; GO:0042542; GO:0046686; GO:0048046	apoplast [GO:0048046]; cell wall [GO:0005618]; cytosol [GO:0005829]; Golgi apparatus [GO:0005794]; mitochondrion [GO:0005739]; nucleus [GO:0005634]; plasma membrane [GO:0005886]; vacuolar membrane [GO:0005774]; ATP binding [GO:0005524]; ubiquitin protein ligase binding [GO:0031625]; protein ubiquitination [GO:0016567]; regulation of transcription, DNA-templated [GO:0006355]; response to bacterium…
XLOC_004759	utg12561.8	utg12561|GWHAAAA00012832:27798-31192	CP_TkMS3	12.8914	1.57819	-3.03007	-6.17928	5e-05	0.0199376	yes	XP_021994724.1	enolase [Helianthus annuus]	P26300	Enolase (EC 4.2.1.11) (2-phospho-D-glycerate hydro-lyase) (2-phosphoglycerate dehydratase)	GO:0000015; GO:0000287; GO:0004634; GO:0006096	phosphopyruvate hydratase complex [GO:0000015]; magnesium ion binding [GO:0000287]; phosphopyruvate hydratase activity [GO:0004634]; glycolytic process [GO:0006096]
XLOC_005146	utg12829.10	utg12829|GWHAAAA00025827:41423-75485	CP_TkMS3	4.71385	51.9719	3.46275	5.86315	5e-05	0.0199376	yes	OTF97673.1	putative ruBisCO large subunit-binding protein subunit beta protein [Helianthus annuus]	P08927	RuBisCO large subunit-binding protein subunit beta, chloroplastic (60 kDa chaperonin subunit beta) (CPN-60 beta)	GO:0005524; GO:0009507; GO:0042026	chloroplast [GO:0009507]; ATP binding [GO:0005524]; protein refolding [GO:0042026]
XLOC_005373	utg12931.8	utg12931|GWHAAAA00018723:31029-36013	CP_TkMS3	87.258	21.9824	-1.98894	-4.55854	0.0001	0.0342364	yes	WP_011713795.1	epimerase [Magnetococcus marinus]	Q8T5T1	Midasin (Dynein-related AAA-ATPase MDN1) (MIDAS-containing protein)	GO:0000027; GO:0005524; GO:0005654; GO:0005730; GO:0016887	nucleolus [GO:0005730]; nucleoplasm [GO:0005654]; ATP binding [GO:0005524]; ATPase activity [GO:0016887]; ribosomal large subunit assembly [GO:0000027]
XLOC_005413	-	utg12950|GWHAAAA00028280:7638-9005	CP_TkMS3	11.4408	1.94685	-2.55497	-4.2801	0.00015	0.0453938	yes	.	.	.	.	.	.
XLOC_005435	utg12960.9	utg12960|GWHAAAA00027504:51468-55206	CP_TkMS3	69.139	14.702	-2.23349	-4.66639	5e-05	0.0199376	yes	XP_021970017.1	sugar transporter ERD6-like 16 [Helianthus annuus]	Q8LBI9	Sugar transporter ERD6-like 16	GO:0005351; GO:0005355; GO:0016021; GO:0035428; GO:0046323	integral component of membrane [GO:0016021]; glucose transmembrane transporter activity [GO:0005355]; sugar:proton symporter activity [GO:0005351]; glucose import [GO:0046323]; hexose transmembrane transport [GO:0035428]
XLOC_006814	utg13726.14	utg13726|GWHAAAA00027353:31706-38090	CP_TkMS3	12.4684	1.39665	-3.15823	-5.12456	5e-05	0.0199376	yes	XP_022016948.1	ATPase 9, plasma membrane-type-like [Helianthus annuus]	Q42556	ATPase 9, plasma membrane-type (EC 3.6.3.6) (Proton pump 9)	GO:0005524; GO:0005774; GO:0005886; GO:0006754; GO:0008553; GO:0015992; GO:0016021; GO:0046872	integral component of membrane [GO:0016021]; plasma membrane [GO:0005886]; vacuolar membrane [GO:0005774]; ATP binding [GO:0005524]; hydrogen-exporting ATPase activity, phosphorylative mechanism [GO:0008553]; metal ion binding [GO:0046872]; ATP biosynthetic process [GO:0006754]; proton transport [GO:0015992]
XLOC_007050	utg1389.3	utg1389|GWHAAAA00028031:13941-19976	CP_TkMS3	50.911	13.037	-1.96536	-4.41648	5e-05	0.0199376	yes	KVI06839.1	F-box domain, cyclin-like protein [Cynara cardunculus var. scolymus]	Q9M9E8	F-box protein At1g78280	GO:0005829	cytosol [GO:0005829]
XLOC_007064	utg13907.7	utg13907|GWHAAAA00005751:25727-28153	CP_TkMS3	23.8019	3.47251	-2.77703	-6.23371	5e-05	0.0199376	yes	KVI04848.1	Ankyrin repeat-containing protein [Cynara cardunculus var. scolymus]	Q9XEE6	Zinc finger CCCH domain-containing protein 29 (AtC3H29) (AtSZF2)	GO:0003677; GO:0003700; GO:0005634; GO:0006355; GO:0009409; GO:0010200; GO:0046872; GO:0050832	nucleus [GO:0005634]; DNA binding [GO:0003677]; DNA binding transcription factor activity [GO:0003700]; metal ion binding [GO:0046872]; defense response to fungus [GO:0050832]; regulation of transcription, DNA-templated [GO:0006355]; response to chitin [GO:0010200]; response to cold [GO:0009409]
XLOC_007899	utg14388.24	utg14388|GWHAAAA00004858:108358-109940	CP_TkMS3	22.3675	3.40976	-2.71366	-6.11183	5e-05	0.0199376	yes	KVH95587.1	Ribonuclease CAF1 [Cynara cardunculus var. scolymus]	Q9FMS6	Probable CCR4-associated factor 1 homolog 11 (EC 3.1.13.4)	GO:0000289; GO:0000932; GO:0003723; GO:0004535; GO:0005634; GO:0006351; GO:0006355; GO:0008408; GO:0017148; GO:0030015; GO:0042742; GO:0043928; GO:0046872	CCR4-NOT core complex [GO:0030015]; nucleus [GO:0005634]; P-body [GO:0000932]; 3'-5' exonuclease activity [GO:0008408]; metal ion binding [GO:0046872]; poly(A)-specific ribonuclease activity [GO:0004535]; RNA binding [GO:0003723]; defense response to bacterium [GO:0042742]; exonucleolytic nuclear-transcribed mRNA catabolic process involved in deadenylation-dependent decay [GO:0043928]; negative r…
XLOC_009020	utg15128.6	utg15128|GWHAAAA00007279:17507-22630	CP_TkMS3	2.96906	70.8257	4.5762	8.61212	5e-05	0.0199376	yes	XP_012468435.1	PREDICTED: heat shock cognate 70 kDa protein 2 [Gossypium raimondii]	P09189	Heat shock cognate 70 kDa protein	GO:0005524	ATP binding [GO:0005524]
XLOC_009244	utg15245.1	utg15245|GWHAAAA00009684:2941-3677	CP_TkMS3	50.0509	293.084	2.54984	7.91268	5e-05	0.0199376	yes	ABL10073.1	17.7 KD class I small heat-shock protein [Ageratina adenophora]	P13853	17.6 kDa class I heat shock protein 3 (17.6 kDa heat shock protein 3) (AtHsp17.6C)	GO:0005737	cytoplasm [GO:0005737]
XLOC_009736	utg1552.23	utg1552|GWHAAAA00007096:92359-93007	CP_TkMS3	30.9536	3.69315	-3.06718	-7.88158	0.0001	0.0342364	yes	OQX05015.1	hypothetical protein BWK73_34720 [Thiothrix lacustris]	Q6INA9	Histone-lysine N-methyltransferase SETDB1 (EC 2.1.1.43) (SET domain bifurcated 1)	GO:0003677; GO:0005634; GO:0005694; GO:0006351; GO:0007265; GO:0008270; GO:0018024; GO:0090309; GO:1990841	chromosome [GO:0005694]; nucleus [GO:0005634]; DNA binding [GO:0003677]; histone-lysine N-methyltransferase activity [GO:0018024]; promoter-specific chromatin binding [GO:1990841]; zinc ion binding [GO:0008270]; positive regulation of methylation-dependent chromatin silencing [GO:0090309]; Ras protein signal transduction [GO:0007265]; transcription, DNA-templated [GO:0006351]
XLOC_010042	utg1572.15	utg1572|GWHAAAA00015187:70697-72890	CP_TkMS3	251.679	50.7124	-2.31118	-5.20369	5e-05	0.0199376	yes	KVH96028.1	Senescence/spartin-associated [Cynara cardunculus var. scolymus]	O48832	Protein EARLY-RESPONSIVE TO DEHYDRATION 7, chloroplastic	GO:0005886; GO:0007623; GO:0009409; GO:0009414; GO:0009507; GO:0009644; GO:0009651; GO:0009737	chloroplast [GO:0009507]; plasma membrane [GO:0005886]; circadian rhythm [GO:0007623]; response to abscisic acid [GO:0009737]; response to cold [GO:0009409]; response to high light intensity [GO:0009644]; response to salt stress [GO:0009651]; response to water deprivation [GO:0009414]
XLOC_011273	-	utg16511|GWHAAAA00007427:62130-63192	CP_TkMS3	0.654017	0	-Inf	NA	0.00015	0.0453938	yes	.	.	.	.	.	.
XLOC_011588	utg166.11	utg166|GWHAAAA00001624:46079-49268	CP_TkMS3	41.557	9.78151	-2.08696	-4.4097	5e-05	0.0199376	yes	KVI01529.1	Harbinger transposase-derived nuclease [Cynara cardunculus var. scolymus]	Q9M2U3	Protein ALP1-like (EC 3.1.-.-)	GO:0004518; GO:0005634; GO:0046872	nucleus [GO:0005634]; metal ion binding [GO:0046872]; nuclease activity [GO:0004518]
XLOC_011920	utg16904.1	utg16904|GWHAAAA00022254:1644-2671	CP_TkMS3	239.095	1729.45	2.85466	6.01592	0.0001	0.0342364	yes	KVI09866.1	Alpha crystallin/Hsp20 domain-containing protein, partial [Cynara cardunculus var. scolymus]	P05478	18.5 kDa class I heat shock protein (HSP 18.5)	GO:0005737	cytoplasm [GO:0005737]
XLOC_013697	-	utg18219|GWHAAAA00009453:22627-23028	CP_TkMS3	4.39379	0	-Inf	NA	5e-05	0.0199376	yes	.	.	.	.	.	.
XLOC_014357	utg18685.1	utg18685|GWHAAAA00000303:37-918	CP_TkMS3	37.6455	315.991	3.06933	8.6912	5e-05	0.0199376	yes	XP_015956435.1	17.3 kDa class I heat shock protein [Arachis duranensis]	P02519	17.3 kDa class I heat shock protein (HSP 17.3)	GO:0005737	cytoplasm [GO:0005737]
XLOC_014561	utg18834.3	utg18834|GWHAAAA00019471:17019-18806	CP_TkMS3	23.4011	2.79613	-3.06507	-6.77257	5e-05	0.0199376	yes	XP_022034983.1	serine/threonine-protein kinase OXI1-like [Helianthus annuus]	Q9LSF1	Serine/threonine-protein kinase OXI1 (EC 2.7.11.1) (AGC serine/threonine-protein kinase subfamily 2 member 1) (Protein OXIDATIVE SIGNAL-INDUCIBLE 1)	GO:0004672; GO:0004674; GO:0005524; GO:0005634; GO:0005737; GO:0005886; GO:0006468; GO:0006952; GO:0006979; GO:0009611; GO:0016301; GO:0019901; GO:0035556	cytoplasm [GO:0005737]; nucleus [GO:0005634]; plasma membrane [GO:0005886]; ATP binding [GO:0005524]; kinase activity [GO:0016301]; protein kinase activity [GO:0004672]; protein kinase binding [GO:0019901]; protein serine/threonine kinase activity [GO:0004674]; defense response [GO:0006952]; intracellular signal transduction [GO:0035556]; protein phosphorylation [GO:0006468]; response to oxidativ…
XLOC_015138	utg19204.5	utg19204|GWHAAAA00007213:13213-15229	CP_TkMS3	25.687	128.119	2.31838	6.05388	5e-05	0.0199376	yes	KVI02743.1	Concanavalin A-like lectin/glucanase superfamily [Cynara cardunculus var. scolymus]	Q8LER3	Probable xyloglucan endotransglucosylase/hydrolase protein 7 (At-XTH7) (XTH-7) (EC 2.4.1.207)	GO:0004553; GO:0005618; GO:0010411; GO:0016762; GO:0042546; GO:0048046; GO:0071555	apoplast [GO:0048046]; cell wall [GO:0005618]; hydrolase activity, hydrolyzing O-glycosyl compounds [GO:0004553]; xyloglucan:xyloglucosyl transferase activity [GO:0016762]; cell wall biogenesis [GO:0042546]; cell wall organization [GO:0071555]; xyloglucan metabolic process [GO:0010411]
XLOC_015690	utg19621.11	utg19621|GWHAAAA00001743:50856-52290	CP_TkMS3	18.3458	2.50007	-2.87541	-6.29717	5e-05	0.0199376	yes	XP_022001477.1	dehydration-responsive element-binding protein 1D-like [Helianthus annuus]	Q9FJ93	Dehydration-responsive element-binding protein 1D (Protein DREB1D) (C-repeat/dehydration-responsive element-binding factor 4) (C-repeat-binding factor 4) (CRT/DRE-binding factor 4)	GO:0003700; GO:0005634; GO:0006351; GO:0009738; GO:0019760; GO:0043565	nucleus [GO:0005634]; DNA binding transcription factor activity [GO:0003700]; sequence-specific DNA binding [GO:0043565]; abscisic acid-activated signaling pathway [GO:0009738]; glucosinolate metabolic process [GO:0019760]; transcription, DNA-templated [GO:0006351]
XLOC_016539	utg20245.10	utg20245|GWHAAAA00003503:33034-36581	CP_TkMS3	4.7836	34.279	2.84115	6.56947	5e-05	0.0199376	yes	XP_022015301.1	heat shock protein 90-5, chloroplastic-like [Helianthus annuus]	Q9SIF2	Heat shock protein 90-5, chloroplastic (AtHSP90.5) (AtHsp90-5) (Heat shock protein 88-1) (Hsp88-1) (Hsp90C) (Protein EMBRYO DEFECTIVE 1956) (Protein chlorate-resistance 88)	GO:0005524; GO:0005739; GO:0005774; GO:0006457; GO:0009408; GO:0009414; GO:0009507; GO:0009536; GO:0009570; GO:0009651; GO:0009704; GO:0009941; GO:0010157; GO:0042803; GO:0045037; GO:0051082	chloroplast [GO:0009507]; chloroplast envelope [GO:0009941]; chloroplast stroma [GO:0009570]; mitochondrion [GO:0005739]; plastid [GO:0009536]; vacuolar membrane [GO:0005774]; ATP binding [GO:0005524]; protein homodimerization activity [GO:0042803]; unfolded protein binding [GO:0051082]; de-etiolation [GO:0009704]; protein folding [GO:0006457]; protein import into chloroplast stroma [GO:0045037];…
XLOC_016705	utg20378.1	utg20378|GWHAAAA00014264:0-3687	CP_TkMS3	4.86362	20.5008	2.07558	4.84077	5e-05	0.0199376	yes	XP_022008632.1	mechanosensitive ion channel protein 6-like [Helianthus annuus]	F4IME2	Mechanosensitive ion channel protein 8 (Mechanosensitive channel of small conductance-like 8) (MscS-Like protein 8)	GO:0005886; GO:0006820; GO:0012505; GO:0016021; GO:0055085	endomembrane system [GO:0012505]; integral component of membrane [GO:0016021]; plasma membrane [GO:0005886]; anion transport [GO:0006820]; transmembrane transport [GO:0055085]
XLOC_017088	utg2063.3	utg2063|GWHAAAA00002750:19296-21913	CP_TkMS3	23.6132	2.30598	-3.35614	-6.31665	5e-05	0.0199376	yes	KVH99786.1	EEIG1/EHBP1 N-terminal domain-containing protein [Cynara cardunculus var. scolymus]	A8HVH0	Acyl carrier protein (ACP)	GO:0005737; GO:0006633	cytoplasm [GO:0005737]; fatty acid biosynthetic process [GO:0006633]
XLOC_017340	utg20838.10	utg20838|GWHAAAA00005567:9648-10101	CP_TkMS3	14.4952	158.525	3.45106	13.4541	5e-05	0.0199376	yes	KVI01498.1	Alpha crystallin/Hsp20 domain-containing protein [Cynara cardunculus var. scolymus]	P46516	17.9 kDa class II heat shock protein	GO:0005737	cytoplasm [GO:0005737]
XLOC_017857	utg21288.4	utg21288|GWHAAAA00027129:9972-12795	CP_TkMS3	16.1318	2.69092	-2.58373	-4.32529	5e-05	0.0199376	yes	XP_023748780.1	leucine-rich repeat extensin-like protein 4 [Lactuca sativa]	O48809	Leucine-rich repeat extensin-like protein 2 (AtLRX2) (LRR/EXTENSIN2) (Cell wall hydroxyproline-rich glycoprotein)	GO:0005576; GO:0005618; GO:0007275; GO:0071555	cell wall [GO:0005618]; extracellular region [GO:0005576]; cell wall organization [GO:0071555]; multicellular organism development [GO:0007275]
XLOC_018063	utg2146.10	utg2146|GWHAAAA00026558:34260-37523	CP_TkMS3	50.5521	9.45113	-2.41921	-4.79257	5e-05	0.0199376	yes	KVI07082.1	DNA-binding WRKY [Cynara cardunculus var. scolymus]	Q93WU8	Probable WRKY transcription factor 54 (WRKY DNA-binding protein 54)	GO:0003700; GO:0005634; GO:0006351; GO:0009751; GO:0031347; GO:0043565; GO:1900056	nucleus [GO:0005634]; DNA binding transcription factor activity [GO:0003700]; sequence-specific DNA binding [GO:0043565]; negative regulation of leaf senescence [GO:1900056]; regulation of defense response [GO:0031347]; response to salicylic acid [GO:0009751]; transcription, DNA-templated [GO:0006351]
XLOC_018115	utg2151.6	utg2151|GWHAAAA00015923:21795-24698	CP_TkMS3	4.05583	31.1037	2.93902	5.98799	5e-05	0.0199376	yes	XP_022009310.1	ruBisCO large subunit-binding protein subunit beta, chloroplastic-like [Helianthus annuus]	P08927	RuBisCO large subunit-binding protein subunit beta, chloroplastic (60 kDa chaperonin subunit beta) (CPN-60 beta)	GO:0005524; GO:0009507; GO:0042026	chloroplast [GO:0009507]; ATP binding [GO:0005524]; protein refolding [GO:0042026]
XLOC_018524	utg21897.3	utg21897|GWHAAAA00019476:22470-25440	CP_TkMS3	34.0787	4.31624	-2.98102	-5.08682	5e-05	0.0199376	yes	AAC49326.1	wounding-induced ribonuclease gene [Zinnia violacea]	P42813	Ribonuclease 1 (EC 3.1.27.1)	GO:0003723; GO:0004540; GO:0005576; GO:0005618; GO:0005886; GO:0009611; GO:0009718; GO:0016036; GO:0033897	cell wall [GO:0005618]; extracellular region [GO:0005576]; plasma membrane [GO:0005886]; ribonuclease activity [GO:0004540]; ribonuclease T2 activity [GO:0033897]; RNA binding [GO:0003723]; anthocyanin-containing compound biosynthetic process [GO:0009718]; cellular response to phosphate starvation [GO:0016036]; response to wounding [GO:0009611]
XLOC_019197	utg2247.3	utg2247|GWHAAAA00010106:14090-15813	CP_TkMS3	7.98109	48.3584	2.59911	6.29553	5e-05	0.0199376	yes	KVH97876.1	hypothetical protein Ccrd_000010 [Cynara cardunculus var. scolymus]	O65373	BAG family molecular chaperone regulator 5, mitochondrial (Bcl-2-associated athanogene 5)	GO:0005516; GO:0005739; GO:0006457; GO:0009266; GO:0009506; GO:0043207; GO:0051087	mitochondrion [GO:0005739]; plasmodesma [GO:0009506]; calmodulin binding [GO:0005516]; chaperone binding [GO:0051087]; protein folding [GO:0006457]; response to external biotic stimulus [GO:0043207]; response to temperature stimulus [GO:0009266]
XLOC_019423	utg2265.3	utg2265|GWHAAAA00018117:11739-16382	CP_TkMS3	79.0728	603.607	2.93236	4.56308	5e-05	0.0199376	yes	XP_022034649.1	peptidyl-prolyl cis-trans isomerase FKBP62-like [Helianthus annuus]	Q38931	Peptidyl-prolyl cis-trans isomerase FKBP62 (PPIase FKBP62) (EC 5.2.1.8) (70 kDa peptidyl-prolyl isomerase) (FK506-binding protein 62) (AtFKBP62) (Immunophilin FKBP62) (Peptidylprolyl isomerase ROF1) (Protein ROTAMASE FKBP 1) (Rotamase)	GO:0003755; GO:0005516; GO:0005528; GO:0005634; GO:0005737; GO:0061077; GO:0070370	cytoplasm [GO:0005737]; nucleus [GO:0005634]; calmodulin binding [GO:0005516]; FK506 binding [GO:0005528]; peptidyl-prolyl cis-trans isomerase activity [GO:0003755]; cellular heat acclimation [GO:0070370]; chaperone-mediated protein folding [GO:0061077]
XLOC_019423	utg2265.4	utg2265|GWHAAAA00018117:11739-16382	CP_TkMS3	79.0728	603.607	2.93236	4.56308	5e-05	0.0199376	yes	XP_011101103.1	F-box protein At5g07610-like [Sesamum indicum]	Q9FLS0	F-box protein At5g07610	NA	NA
XLOC_019875	utg23021.1	utg23021|GWHAAAA00021153:13627-19451	CP_TkMS3	7.6451	0.901166	-3.08467	-5.31663	5e-05	0.0199376	yes	XP_022021485.1	E3 ubiquitin-protein ligase RGLG2-like isoform X1 [Helianthus annuus]	Q9LY87	E3 ubiquitin-protein ligase RGLG2 (EC 2.3.2.27) (RING domain ligase 2)	GO:0004842; GO:0005634; GO:0005886; GO:0009690; GO:0009738; GO:0009850; GO:0046872; GO:0080148	nucleus [GO:0005634]; plasma membrane [GO:0005886]; metal ion binding [GO:0046872]; ubiquitin-protein transferase activity [GO:0004842]; abscisic acid-activated signaling pathway [GO:0009738]; auxin metabolic process [GO:0009850]; cytokinin metabolic process [GO:0009690]; negative regulation of response to water deprivation [GO:0080148]
XLOC_019968	utg2308.13	utg2308|GWHAAAA00015466:43992-50769	CP_TkMS3	3.59882	22.0986	2.61836	4.62066	5e-05	0.0199376	yes	XP_021997046.1	17.4 kDa class III heat shock protein [Helianthus annuus]	Q9SYG1	17.4 kDa class III heat shock protein (17.4 kDa heat shock protein 2) (AtHsp17.4B)	GO:0005737; GO:0009408; GO:0009644; GO:0042542	cytoplasm [GO:0005737]; response to heat [GO:0009408]; response to high light intensity [GO:0009644]; response to hydrogen peroxide [GO:0042542]
XLOC_019971	utg2308.28	utg2308|GWHAAAA00015466:133368-136590	CP_TkMS3	16.1983	3.4339	-2.23792	-4.67938	5e-05	0.0199376	yes	XP_021997054.1	protein TIFY 10A-like isoform X2 [Helianthus annuus]	Q9LMA8	Protein TIFY 10A (Jasmonate ZIM domain-containing protein 1)	GO:0003714; GO:0005634; GO:0006351; GO:0006355; GO:0009555; GO:0009611; GO:0009753; GO:0009867; GO:0009908; GO:0031347; GO:0042742; GO:1900067; GO:1903507; GO:2000022	nucleus [GO:0005634]; transcription corepressor activity [GO:0003714]; defense response to bacterium [GO:0042742]; flower development [GO:0009908]; jasmonic acid mediated signaling pathway [GO:0009867]; negative regulation of nucleic acid-templated transcription [GO:1903507]; pollen development [GO:0009555]; regulation of cellular response to alkaline pH [GO:1900067]; regulation of defense respon…
XLOC_020772	utg23796.13	utg23796|GWHAAAA00003712:9598-10752	CP_TkMS3	1.11361	0	-Inf	NA	5e-05	0.0199376	yes	XP_010031611.1	PREDICTED: uncharacterized protein LOC104421387 [Eucalyptus grandis]	P09093	Chymotrypsin-like elastase family member 3A (EC 3.4.21.70) (Elastase IIIA) (Elastase-3A) (Protease E)	GO:0004252; GO:0005615; GO:0006508; GO:0007586; GO:0008203	extracellular space [GO:0005615]; serine-type endopeptidase activity [GO:0004252]; cholesterol metabolic process [GO:0008203]; digestion [GO:0007586]; proteolysis [GO:0006508]
XLOC_021243	-	utg24234|GWHAAAA00006099:4077-6650	CP_TkMS3	21.2	88.5152	2.06186	4.34686	5e-05	0.0199376	yes	.	.	.	.	.	.
XLOC_022713	utg2570.3	utg2570|GWHAAAA00008155:12576-15131	CP_TkMS3	27.5872	103.437	1.90669	3.9545	0.0001	0.0342364	yes	KVH93660.1	AAA+ ATPase domain-containing protein [Cynara cardunculus var. scolymus]	Q9FKM3	AAA-ATPase At5g57480 (EC 3.6.1.3)	GO:0005524; GO:0016887	ATP binding [GO:0005524]; ATPase activity [GO:0016887]
XLOC_023003	utg25985.1	utg25985|GWHAAAA00019331:4509-6682	CP_TkMS3	1.01546	0	-Inf	NA	5e-05	0.0199376	yes	XP_016559392.1	PREDICTED: 60S acidic ribosomal protein P0 [Capsicum annuum]	P50346	60S acidic ribosomal protein P0	GO:0005840; GO:0042254	ribosome [GO:0005840]; ribosome biogenesis [GO:0042254]
XLOC_023093	-	utg26048|GWHAAAA00006541:11782-12436	CP_TkMS3	1.51463	0	-Inf	NA	5e-05	0.0199376	yes	.	.	.	.	.	.
XLOC_023793	utg2680.15	utg2680|GWHAAAA00010846:60730-61930	CP_TkMS3	70.071	19.2904	-1.86093	-4.94129	0.0001	0.0342364	yes	KVI03025.1	Late embryogenesis abundant protein, LEA-14 [Cynara cardunculus var. scolymus]	Q8LD98	NDR1/HIN1-like protein 6	GO:0005829; GO:0005886; GO:0006970; GO:0009737; GO:0009738; GO:0010116; GO:0016021; GO:1902074	cytosol [GO:0005829]; integral component of membrane [GO:0016021]; plasma membrane [GO:0005886]; abscisic acid-activated signaling pathway [GO:0009738]; positive regulation of abscisic acid biosynthetic process [GO:0010116]; response to abscisic acid [GO:0009737]; response to osmotic stress [GO:0006970]; response to salt [GO:1902074]
XLOC_024104	utg27153.1	utg27153|GWHAAAA00011382:258-2762	CP_TkMS3	16.3505	124.212	2.9254	6.82937	5e-05	0.0199376	yes	XP_008054512.2	LOW QUALITY PROTEIN: heat shock 70 kDa protein 1-like [Carlito syrichta]	Q2TVY7	Vacuolar protein sorting/targeting protein 10 (Carboxypeptidase Y receptor) (CPY receptor) (Sortilin vps10) (Vacuolar protein sorting-associated protein 10)	GO:0005770; GO:0005794; GO:0006623; GO:0007034; GO:0016021; GO:0031902	Golgi apparatus [GO:0005794]; integral component of membrane [GO:0016021]; late endosome [GO:0005770]; late endosome membrane [GO:0031902]; protein targeting to vacuole [GO:0006623]; vacuolar transport [GO:0007034]
XLOC_024147	utg27194.1	utg27194|GWHAAAA00028623:1-4171	CP_TkMS3	31.0422	6.86371	-2.17717	-4.96732	5e-05	0.0199376	yes	XP_021998126.1	sodium/calcium exchanger NCL-like [Helianthus annuus]	Q8L636	Sodium/calcium exchanger NCL (Na(+)/Ca(2+)-exchange protein NCL) (Protein NCX-like) (AtNCL)	GO:0000325; GO:0005432; GO:0005509; GO:0005773; GO:0005774; GO:0005886; GO:0009506; GO:0016020; GO:0016021; GO:0055074; GO:0071472	integral component of membrane [GO:0016021]; membrane [GO:0016020]; plant-type vacuole [GO:0000325]; plasma membrane [GO:0005886]; plasmodesma [GO:0009506]; vacuolar membrane [GO:0005774]; vacuole [GO:0005773]; calcium ion binding [GO:0005509]; calcium:sodium antiporter activity [GO:0005432]; calcium ion homeostasis [GO:0055074]; cellular response to salt stress [GO:0071472]
XLOC_024198	utg2724.21	utg2724|GWHAAAA00017122:84771-88054	CP_TkMS3	74.4732	855.838	3.52255	6.00189	5e-05	0.0199376	yes	OVA00191.1	Heat shock protein Hsp90 family [Macleaya cordata]	P51819	Heat shock protein 83	GO:0005524; GO:0005737; GO:0006457; GO:0006950; GO:0051082	cytoplasm [GO:0005737]; ATP binding [GO:0005524]; unfolded protein binding [GO:0051082]; protein folding [GO:0006457]; response to stress [GO:0006950]
XLOC_024387	-	utg2742|GWHAAAA00006773:130698-132606	CP_TkMS3	0.618903	0	-Inf	NA	5e-05	0.0199376	yes	.	.	.	.	.	.
XLOC_024825	utg27881.5	utg27881|GWHAAAA00028543:6702-11323	CP_TkMS3	11.4695	53.1754	2.21296	5.06712	5e-05	0.0199376	yes	XP_021977918.1	heat shock protein 90-5, chloroplastic-like [Helianthus annuus]	Q9SIF2	Heat shock protein 90-5, chloroplastic (AtHSP90.5) (AtHsp90-5) (Heat shock protein 88-1) (Hsp88-1) (Hsp90C) (Protein EMBRYO DEFECTIVE 1956) (Protein chlorate-resistance 88)	GO:0005524; GO:0005739; GO:0005774; GO:0006457; GO:0009408; GO:0009414; GO:0009507; GO:0009536; GO:0009570; GO:0009651; GO:0009704; GO:0009941; GO:0010157; GO:0042803; GO:0045037; GO:0051082	chloroplast [GO:0009507]; chloroplast envelope [GO:0009941]; chloroplast stroma [GO:0009570]; mitochondrion [GO:0005739]; plastid [GO:0009536]; vacuolar membrane [GO:0005774]; ATP binding [GO:0005524]; protein homodimerization activity [GO:0042803]; unfolded protein binding [GO:0051082]; de-etiolation [GO:0009704]; protein folding [GO:0006457]; protein import into chloroplast stroma [GO:0045037];…
XLOC_024910	-	utg27972|GWHAAAA00022909:26425-28102	CP_TkMS3	0.736158	0	-Inf	NA	5e-05	0.0199376	yes	.	.	.	.	.	.
XLOC_024946	utg28049.2	utg28049|GWHAAAA00028939:14646-18679	CP_TkMS3	18.0991	5.46089	-1.72871	-3.66796	0.0001	0.0342364	yes	XP_021994726.1	serine/threonine-protein kinase CTR1-like isoform X1 [Helianthus annuus]	Q05609	Serine/threonine-protein kinase CTR1 (EC 2.7.11.1) (Protein CONSTITUTIVE TRIPLE RESPONSE1)	GO:0001666; GO:0004674; GO:0004712; GO:0004871; GO:0005524; GO:0005789; GO:0009686; GO:0009723; GO:0009744; GO:0009750; GO:0009873; GO:0010105; GO:0010182; GO:0046777; GO:0048510; GO:0071281; GO:2000035; GO:2000069	endoplasmic reticulum membrane [GO:0005789]; ATP binding [GO:0005524]; protein serine/threonine kinase activity [GO:0004674]; protein serine/threonine/tyrosine kinase activity [GO:0004712]; signal transducer activity [GO:0004871]; cellular response to iron ion [GO:0071281]; ethylene-activated signaling pathway [GO:0009873]; gibberellin biosynthetic process [GO:0009686]; negative regulation of eth…
XLOC_025132	-	utg28199|GWHAAAA00019660:9759-10420	CP_TkMS3	1.48912	0	-Inf	NA	5e-05	0.0199376	yes	.	.	.	.	.	.
XLOC_026206	utg29315.4	utg29315|GWHAAAA00013657:30196-34823	CP_TkMS3	3.24053	19.7701	2.60902	5.84859	5e-05	0.0199376	yes	KVI06387.1	Major facilitator superfamily domain, general substrate transporter [Cynara cardunculus var. scolymus]	Q8H157	Protein NRT1/ PTR FAMILY 4.6 (AtNPF4.6) (Nitrate transporter 1.2) (Nitrate transporter NTL1) (Protein ABA-IMPORTING TRANSPORTER 1)	GO:0005886; GO:0009624; GO:0010119; GO:0015293; GO:0016021; GO:0042128; GO:0080168; GO:0090440	integral component of membrane [GO:0016021]; plasma membrane [GO:0005886]; abscisic acid transmembrane transporter activity [GO:0090440]; symporter activity [GO:0015293]; abscisic acid transport [GO:0080168]; nitrate assimilation [GO:0042128]; regulation of stomatal movement [GO:0010119]; response to nematode [GO:0009624]
XLOC_027716	-	utg31021|GWHAAAA00014856:14978-16626	CP_TkMS3	0.751496	0	-Inf	NA	5e-05	0.0199376	yes	.	.	.	.	.	.
XLOC_027782	utg3109.13	utg3109|GWHAAAA00002311:49557-52931	CP_TkMS3	24.4622	114.298	2.22417	5.25251	5e-05	0.0199376	yes	KVH88676.1	Sodium/sulfate symporter [Cynara cardunculus var. scolymus]	Q8LG88	Tonoplast dicarboxylate transporter (AttDT) (Sodium-dicarboxylate cotransporter-like) (AtSDAT) (Vacuolar malate transporter)	GO:0005773; GO:0005774; GO:0006814; GO:0015140; GO:0015743; GO:0016021; GO:0051453	integral component of membrane [GO:0016021]; vacuolar membrane [GO:0005774]; vacuole [GO:0005773]; malate transmembrane transporter activity [GO:0015140]; malate transport [GO:0015743]; regulation of intracellular pH [GO:0051453]; sodium ion transport [GO:0006814]
XLOC_028398	-	utg3182|GWHAAAA00007180:13272-14101	CP_TkMS3	1.10823	0	-Inf	NA	5e-05	0.0199376	yes	.	.	.	.	.	.
XLOC_029019	utg32632.2	utg32632|GWHAAAA00030162:10926-12710	CP_TkMS3	17.3659	182.248	3.39157	7.89065	5e-05	0.0199376	yes	KVI01498.1	Alpha crystallin/Hsp20 domain-containing protein [Cynara cardunculus var. scolymus]	P46516	17.9 kDa class II heat shock protein	GO:0005737	cytoplasm [GO:0005737]
XLOC_031527	utg3601.6	utg3601|GWHAAAA00008458:25174-25447	CP_TkMS3	343.423	39.7341	-3.11154	-26.3195	5e-05	0.0199376	yes	KVH93911.1	Arabinogalactan peptide, AGP [Cynara cardunculus var. scolymus]	O82337	Arabinogalactan peptide 16 (AG-peptide 16)	GO:0005886; GO:0031225	anchored component of membrane [GO:0031225]; plasma membrane [GO:0005886]
XLOC_032530	utg3754.42	utg3754|GWHAAAA00008161:130622-152816	CP_TkMS3	5.79612	0.802229	-2.853	-4.52639	0.00015	0.0453938	yes	BAT74232.1	hypothetical protein VIGAN_01185400, partial [Vigna angularis var. angularis]	Q9H611	ATP-dependent DNA helicase PIF1 (EC 3.6.4.12) (DNA repair and recombination helicase PIF1) (PIF1/RRM3 DNA helicase-like protein)	GO:0000002; GO:0000287; GO:0000723; GO:0000784; GO:0005524; GO:0005657; GO:0005739; GO:0006260; GO:0006281; GO:0006310; GO:0010521; GO:0017116; GO:0032204; GO:0032211; GO:0033682; GO:0042162; GO:0043141; GO:0044806; GO:0051974	mitochondrion [GO:0005739]; nuclear chromosome, telomeric region [GO:0000784]; replication fork [GO:0005657]; ATP binding [GO:0005524]; ATP-dependent 5'-3' DNA helicase activity [GO:0043141]; ATP-dependent 5'-3' DNA/RNA helicase activity [GO:0033682]; magnesium ion binding [GO:0000287]; single-stranded DNA-dependent ATP-dependent DNA helicase activity [GO:0017116]; telomerase inhibitor activity […
XLOC_032808	utg3835.10	utg3835|GWHAAAA00022060:35921-39453	CP_TkMS3	143.824	19.5534	-2.87881	-6.28108	5e-05	0.0199376	yes	KVH90561.1	Calcium-binding EF-hand [Cynara cardunculus var. scolymus]	Q06850	Calcium-dependent protein kinase 1 (AtCDPK 1) (CDPK 1) (EC 2.7.11.1) (Calcium-dependent protein kinase isoform AK1)	GO:0004674; GO:0004683; GO:0005509; GO:0005516; GO:0005524; GO:0005634; GO:0005777; GO:0005778; GO:0006468; GO:0009738; GO:0009931; GO:0010857; GO:0018105; GO:0035556; GO:0046777	nucleus [GO:0005634]; peroxisomal membrane [GO:0005778]; peroxisome [GO:0005777]; ATP binding [GO:0005524]; calcium ion binding [GO:0005509]; calcium-dependent protein kinase activity [GO:0010857]; calcium-dependent protein serine/threonine kinase activity [GO:0009931]; calmodulin binding [GO:0005516]; calmodulin-dependent protein kinase activity [GO:0004683]; protein serine/threonine kinase acti…
XLOC_033016	utg3915.10	utg3915|GWHAAAA00007183:44910-45772	CP_TkMS3	1.18564	0	-Inf	NA	5e-05	0.0199376	yes	KVH89775.1	AP2/ERF domain-containing protein [Cynara cardunculus var. scolymus]	Q40478	Ethylene-responsive transcription factor 5 (Ethylene-responsive element-binding factor 4) (EREBP-4) (Ethylene-responsive element-binding factor 5 homolog) (NtERF4)	GO:0003677; GO:0003700; GO:0005634; GO:0006351; GO:0006952; GO:0009873	nucleus [GO:0005634]; DNA binding [GO:0003677]; DNA binding transcription factor activity [GO:0003700]; defense response [GO:0006952]; ethylene-activated signaling pathway [GO:0009873]; transcription, DNA-templated [GO:0006351]
XLOC_033235	utg4001.7	utg4001|GWHAAAA00011036:22727-28462	CP_TkMS3	10.387	1.85173	-2.48784	-5.15067	0.00015	0.0453937	yes	XP_022035318.1	GDSL esterase/lipase At1g28580-like isoform X1 [Helianthus annuus]	Q9FXJ2	GDSL esterase/lipase At1g28580 (EC 3.1.1.-) (Extracellular lipase At1g28580)	GO:0005576; GO:0005773; GO:0016042; GO:0016788	extracellular region [GO:0005576]; vacuole [GO:0005773]; hydrolase activity, acting on ester bonds [GO:0016788]; lipid catabolic process [GO:0016042]
XLOC_033393	utg4050.10	utg4050|GWHAAAA00027406:33463-37189	CP_TkMS3	11.9836	2.38695	-2.32782	-5.0913	5e-05	0.0199376	yes	KVI05638.1	Ribonuclease CAF1 [Cynara cardunculus var. scolymus]	Q9FMS6	Probable CCR4-associated factor 1 homolog 11 (EC 3.1.13.4)	GO:0000289; GO:0000932; GO:0003723; GO:0004535; GO:0005634; GO:0006351; GO:0006355; GO:0008408; GO:0017148; GO:0030015; GO:0042742; GO:0043928; GO:0046872	CCR4-NOT core complex [GO:0030015]; nucleus [GO:0005634]; P-body [GO:0000932]; 3'-5' exonuclease activity [GO:0008408]; metal ion binding [GO:0046872]; poly(A)-specific ribonuclease activity [GO:0004535]; RNA binding [GO:0003723]; defense response to bacterium [GO:0042742]; exonucleolytic nuclear-transcribed mRNA catabolic process involved in deadenylation-dependent decay [GO:0043928]; negative r…
XLOC_033518	-	utg4106|GWHAAAA00023259:8480-10164	CP_TkMS3	0.429676	0	-Inf	NA	5e-05	0.0199376	yes	.	.	.	.	.	.
XLOC_033585	-	utg4126|GWHAAAA00012168:24060-25517	CP_TkMS3	0	0.54997	Inf	NA	0.00015	0.0453938	yes	.	.	.	.	.	.
XLOC_033672	utg4171.11	utg4171|GWHAAAA00009005:53232-54513	CP_TkMS3	27.9444	5.70272	-2.29283	-5.52884	0.0001	0.0342364	yes	KVH97589.1	Protein of unknown function DUF4228 [Cynara cardunculus var. scolymus]	Q5QZ13	Asparagine--tRNA ligase (EC 6.1.1.22) (Asparaginyl-tRNA synthetase) (AsnRS)	GO:0003676; GO:0004816; GO:0005524; GO:0005737; GO:0006421	cytoplasm [GO:0005737]; asparagine-tRNA ligase activity [GO:0004816]; ATP binding [GO:0005524]; nucleic acid binding [GO:0003676]; asparaginyl-tRNA aminoacylation [GO:0006421]
XLOC_033708	utg4187.14	utg4187|GWHAAAA00007956:76390-77678	CP_TkMS3	8.25043	39.1918	2.24801	5.87231	0.00015	0.0453938	yes	KVI03043.1	Rossmann-like alpha/beta/alpha sandwich fold [Cynara cardunculus var. scolymus]	Q8LGG8	Universal stress protein A-like protein	GO:0005886; GO:0006950; GO:0016208	plasma membrane [GO:0005886]; AMP binding [GO:0016208]; response to stress [GO:0006950]
XLOC_033753	utg4202.2	utg4202|GWHAAAA00026804:27717-35924	CP_TkMS3	21.3209	4.19179	-2.34663	-4.73794	5e-05	0.0199376	yes	XP_022016910.1	zinc finger CCCH domain-containing protein 29-like [Helianthus annuus]	Q9XEE6	Zinc finger CCCH domain-containing protein 29 (AtC3H29) (AtSZF2)	GO:0003677; GO:0003700; GO:0005634; GO:0006355; GO:0009409; GO:0010200; GO:0046872; GO:0050832	nucleus [GO:0005634]; DNA binding [GO:0003677]; DNA binding transcription factor activity [GO:0003700]; metal ion binding [GO:0046872]; defense response to fungus [GO:0050832]; regulation of transcription, DNA-templated [GO:0006355]; response to chitin [GO:0010200]; response to cold [GO:0009409]
XLOC_033823	utg4229.1	utg4229|GWHAAAA00024730:6139-8365	CP_TkMS3	86.3515	16.0281	-2.42962	-5.69346	5e-05	0.0199376	yes	ACB56927.1	glycosyltransferase UGT95A1 [Pilosella officinarum]	Q40287	Anthocyanidin 3-O-glucosyltransferase 5 (EC 2.4.1.115) (Flavonol 3-O-glucosyltransferase 5) (UDP-glucose flavonoid 3-O-glucosyltransferase 5)	GO:0009718; GO:0047213	anthocyanidin 3-O-glucosyltransferase activity [GO:0047213]; anthocyanin-containing compound biosynthetic process [GO:0009718]
XLOC_034585	utg4489.1	utg4489|GWHAAAA00017203:3042-3976	CP_TkMS3	15.6711	2.1628	-2.85713	-6.23267	0.0001	0.0342364	yes	NP_001324810.1	embryonic cell protein 63 [Arabidopsis thaliana]	Q9SKP0	Late embryogenesis abundant protein ECP63 (Embryonic cell protein 63) (AtECP63) (LEA domain-containing protein ECP63)	GO:0005829	cytosol [GO:0005829]
XLOC_035006	utg4634.9	utg4634|GWHAAAA00008461:57286-59961	CP_TkMS3	9.66328	1.00485	-3.26553	-6.2626	5e-05	0.0199376	yes	XP_021983065.1	ATP synthase subunit beta, mitochondrial-like [Helianthus annuus]	Q01859	ATP synthase subunit beta, mitochondrial (EC 3.6.3.14)	GO:0000275; GO:0005524; GO:0015986; GO:0046933	mitochondrial proton-transporting ATP synthase complex, catalytic core F(1) [GO:0000275]; ATP binding [GO:0005524]; proton-transporting ATP synthase activity, rotational mechanism [GO:0046933]; ATP synthesis coupled proton transport [GO:0015986]
XLOC_035046	utg4645.10	utg4645|GWHAAAA00007821:77731-80265	CP_TkMS3	24.1441	93.438	1.95234	4.62103	0.0001	0.0342364	yes	KVI10880.1	hypothetical protein Ccrd_010708 [Cynara cardunculus var. scolymus]	Q949R4	Extradiol ring-cleavage dioxygenase (AtLigB) (EC 1.13.11.-)	GO:0006725; GO:0008198; GO:0008270; GO:0016701; GO:0051213	dioxygenase activity [GO:0051213]; ferrous iron binding [GO:0008198]; oxidoreductase activity, acting on single donors with incorporation of molecular oxygen [GO:0016701]; zinc ion binding [GO:0008270]; cellular aromatic compound metabolic process [GO:0006725]
XLOC_036702	utg5248.1	utg5248|GWHAAAA00006708:650-4346	CP_TkMS3	27.9812	5.28235	-2.40521	-4.93489	5e-05	0.0199376	yes	KVI12111.1	Peptidyl-prolyl cis-trans isomerase, FKBP-type [Cynara cardunculus var. scolymus]	P04052	DNA-directed RNA polymerase II subunit RPB1 (RNA polymerase II subunit B1) (EC 2.7.7.6) (DNA-directed RNA polymerase III largest subunit)	GO:0003677; GO:0003899; GO:0005634; GO:0005665; GO:0005700; GO:0005703; GO:0006366; GO:0007095; GO:0046872	DNA-directed RNA polymerase II, core complex [GO:0005665]; nucleus [GO:0005634]; polytene chromosome [GO:0005700]; polytene chromosome puff [GO:0005703]; DNA binding [GO:0003677]; DNA-directed 5'-3' RNA polymerase activity [GO:0003899]; metal ion binding [GO:0046872]; mitotic G2 DNA damage checkpoint [GO:0007095]; transcription from RNA polymerase II promoter [GO:0006366]
XLOC_036876	utg5317.13	utg5317|GWHAAAA00002462:67201-68927	CP_TkMS3	3.33985	22.0799	2.72488	6.17142	5e-05	0.0199376	yes	XP_010094065.1	Heat shock 70 kDa protein [Morus notabilis]	P26413	Heat shock 70 kDa protein	GO:0005524	ATP binding [GO:0005524]
XLOC_037530	utg554.6	utg554|GWHAAAA00014161:27763-28355	CP_TkMS3	44.0595	8.5349	-2.36801	-7.1139	0.00015	0.0453938	yes	KVH94839.1	hypothetical protein Ccrd_003091 [Cynara cardunculus var. scolymus]	Q1JPP8	Cyclin-dependent protein kinase inhibitor SMR4 (Protein SIAMESE-RELATED 4)	GO:0004860; GO:0007049	protein kinase inhibitor activity [GO:0004860]; cell cycle [GO:0007049]
XLOC_038163	utg5825.24	utg5825|GWHAAAA00009077:106026-112215	CP_TkMS3	0.799955	0	-Inf	NA	5e-05	0.0199376	yes	WP_015612532.1	MULTISPECIES: LacI family transcriptional regulator [Streptomyces]	P27816	Microtubule-associated protein 4 (MAP-4)	GO:0003723; GO:0005198; GO:0005874; GO:0005875; GO:0005930; GO:0007052; GO:0008017; GO:0014069; GO:0031175; GO:0043005; GO:0051012; GO:0051294; GO:0051301; GO:0070062; GO:0072686; GO:1902856	axoneme [GO:0005930]; extracellular exosome [GO:0070062]; microtubule [GO:0005874]; microtubule associated complex [GO:0005875]; mitotic spindle [GO:0072686]; neuron projection [GO:0043005]; postsynaptic density [GO:0014069]; microtubule binding [GO:0008017]; RNA binding [GO:0003723]; structural molecule activity [GO:0005198]; cell division [GO:0051301]; establishment of spindle orientation [GO:0…
XLOC_038559	utg5995.18	utg5995|GWHAAAA00008237:86822-87905	CP_TkMS3	14.9334	2.06676	-2.85309	-6.0839	0.0001	0.0342364	yes	KVH89692.1	hypothetical protein Ccrd_008314 [Cynara cardunculus var. scolymus]	Q8U064	Glutamate--tRNA ligase (EC 6.1.1.17) (Glutamyl-tRNA synthetase) (GluRS)	GO:0004818; GO:0005524; GO:0005737; GO:0006424	cytoplasm [GO:0005737]; ATP binding [GO:0005524]; glutamate-tRNA ligase activity [GO:0004818]; glutamyl-tRNA aminoacylation [GO:0006424]
XLOC_038727	utg6077.6	utg6077|GWHAAAA00012528:39747-41052	CP_TkMS3	0.583481	0	-Inf	NA	5e-05	0.0199376	yes	XP_022014655.1	uncharacterized protein LOC110914147 [Helianthus annuus]	P30714	Sodium/potassium-transporting ATPase subunit alpha-1 (Na(+)/K(+) ATPase alpha-1 subunit) (EC 3.6.3.9) (Sodium pump subunit alpha-1)	GO:0005391; GO:0005524; GO:0005886; GO:0016021; GO:0042383; GO:0046872	integral component of membrane [GO:0016021]; plasma membrane [GO:0005886]; sarcolemma [GO:0042383]; ATP binding [GO:0005524]; metal ion binding [GO:0046872]; sodium:potassium-exchanging ATPase activity [GO:0005391]
XLOC_038978	utg6205.3	utg6205|GWHAAAA00023587:5544-6074	CP_TkMS3	2.5656	0	-Inf	NA	5e-05	0.0199376	yes	XP_022030402.1	uncharacterized protein LOC110931311 [Helianthus annuus]	P92555	Uncharacterized mitochondrial protein AtMg01250 (ORF102)	GO:0005739	mitochondrion [GO:0005739]
XLOC_040235	utg6815.1	utg6815|GWHAAAA00012957:3865-5839	CP_TkMS3	390.189	41.0554	-3.24853	-7.05187	5e-05	0.0199376	yes	KVH95418.1	Aminotransferase, class I/classII [Cynara cardunculus var. scolymus]	P31531	1-aminocyclopropane-1-carboxylate synthase (ACC synthase) (EC 4.4.1.14) (S-adenosyl-L-methionine methylthioadenosine-lyase)	GO:0009693; GO:0009835; GO:0016847; GO:0030170	1-aminocyclopropane-1-carboxylate synthase activity [GO:0016847]; pyridoxal phosphate binding [GO:0030170]; ethylene biosynthetic process [GO:0009693]; fruit ripening [GO:0009835]
XLOC_040292	utg6838.1	utg6838|GWHAAAA00002190:3886-5245	CP_TkMS3	263.228	68.7305	-1.93729	-6.06945	0.0001	0.0342364	yes	KVI10225.1	hypothetical protein Ccrd_011345 [Cynara cardunculus var. scolymus]	Q8LCL8	Cysteine-rich and transmembrane domain-containing protein B	GO:0003006; GO:0005886; GO:0016021	integral component of membrane [GO:0016021]; plasma membrane [GO:0005886]; developmental process involved in reproduction [GO:0003006]
XLOC_040338	utg6855.6	utg6855|GWHAAAA00001094:51457-53419	CP_TkMS3	48.6336	12.4956	-1.96054	-4.85902	5e-05	0.0199376	yes	KVI12384.1	F-box domain, cyclin-like protein [Cynara cardunculus var. scolymus]	Q0V7S6	F-box/kelch-repeat protein OR23	GO:0016567; GO:0031463	Cul3-RING ubiquitin ligase complex [GO:0031463]; protein ubiquitination [GO:0016567]
XLOC_040558	-	utg6928|GWHAAAA00025683:35843-38686	CP_TkMS3	0.330317	0	-Inf	NA	0.0001	0.0342364	yes	.	.	.	.	.	.
XLOC_040655	utg6957.3	utg6957|GWHAAAA00023516:18874-20530	CP_TkMS3	24.739	188.381	2.9288	6.96282	5e-05	0.0199376	yes	KVH92969.1	Aldolase-type TIM barrel [Cynara cardunculus var. scolymus]	Q9ZNR6	Pyridoxal 5'-phosphate synthase-like subunit PDX1.2 (AtPDX1.2) (AtPDX1;3)	GO:0003824; GO:0005829; GO:0042823; GO:0046982	cytosol [GO:0005829]; catalytic activity [GO:0003824]; protein heterodimerization activity [GO:0046982]; pyridoxal phosphate biosynthetic process [GO:0042823]
XLOC_040765	utg6992.2	utg6992|GWHAAAA00011348:9893-10680	CP_TkMS3	26.7419	166.32	2.63679	7.86795	5e-05	0.0199376	yes	OMO90550.1	hypothetical protein COLO4_19057 [Corchorus olitorius]	P02519	17.3 kDa class I heat shock protein (HSP 17.3)	GO:0005737	cytoplasm [GO:0005737]
XLOC_040993	utg7087.15	utg7087|GWHAAAA00014569:71641-72669	CP_TkMS3	0.862055	0	-Inf	NA	5e-05	0.0199376	yes	XP_785997.3	PREDICTED: cadherin EGF LAG seven-pass G-type receptor 2 [Strongylocentrotus purpuratus]	P11528	Resact receptor (EC 4.6.1.2) (Guanylate cyclase)	GO:0004383; GO:0004672; GO:0005524; GO:0005525; GO:0016021	integral component of membrane [GO:0016021]; ATP binding [GO:0005524]; GTP binding [GO:0005525]; guanylate cyclase activity [GO:0004383]; protein kinase activity [GO:0004672]
XLOC_041296	utg7251.27	utg7251|GWHAAAA00004300:125497-127562	CP_TkMS3	49.2519	7.27104	-2.75994	-6.48166	5e-05	0.0199376	yes	KVH98616.1	hypothetical protein Ccrd_023165 [Cynara cardunculus var. scolymus]	A2Z9A6	UPF0496 protein 4	GO:0016021	integral component of membrane [GO:0016021]
XLOC_041700	utg7406.2	utg7406|GWHAAAA00012888:7008-8327	CP_TkMS3	9.96213	60.1711	2.59455	6.92457	5e-05	0.0199376	yes	KVH91948.1	Alpha crystallin/Hsp20 domain-containing protein [Cynara cardunculus var. scolymus]	Q96331	23.6 kDa heat shock protein, mitochondrial (AtHsp23.6)	GO:0005739; GO:0046686	mitochondrion [GO:0005739]; response to cadmium ion [GO:0046686]
XLOC_042369	utg7722.17	utg7722|GWHAAAA00002323:68917-72274	CP_TkMS3	0.515773	6.51713	3.65943	6.29465	0.00015	0.0453938	yes	XP_022038731.1	stromal 70 kDa heat shock-related protein, chloroplastic-like [Helianthus annuus]	Q02028	Stromal 70 kDa heat shock-related protein, chloroplastic	GO:0005524; GO:0006457; GO:0009570; GO:0051082	chloroplast stroma [GO:0009570]; ATP binding [GO:0005524]; unfolded protein binding [GO:0051082]; protein folding [GO:0006457]
XLOC_042753	utg7873.9	utg7873|GWHAAAA00011980:42271-47227	CP_TkMS3	13.5894	3.94303	-1.78511	-3.7422	0.00015	0.0453938	yes	XP_022039704.1	two-pore potassium channel 1-like [Helianthus annuus]	Q8LBL1	Two-pore potassium channel 1 (AtTPK1) (Calcium-activated outward-rectifying potassium channel 1) (AtKCO1)	GO:0005216; GO:0005774; GO:0005887; GO:0009705; GO:0010029; GO:0010119; GO:0022841; GO:0030007; GO:0030322; GO:0046872; GO:0051260	integral component of plasma membrane [GO:0005887]; plant-type vacuole membrane [GO:0009705]; vacuolar membrane [GO:0005774]; ion channel activity [GO:0005216]; metal ion binding [GO:0046872]; potassium ion leak channel activity [GO:0022841]; cellular potassium ion homeostasis [GO:0030007]; protein homooligomerization [GO:0051260]; regulation of seed germination [GO:0010029]; regulation of stomat…
XLOC_043161	utg8056.7	utg8056|GWHAAAA00009736:31854-34686	CP_TkMS3	183.487	50.7883	-1.85311	-3.82679	0.0001	0.0342364	yes	KVH92730.1	No apical meristem (NAM) protein [Cynara cardunculus var. scolymus]	Q39013	NAC domain-containing protein 2 (ANAC002)	GO:0003677; GO:0003700; GO:0005634; GO:0006351; GO:0009611; GO:0009788	nucleus [GO:0005634]; DNA binding [GO:0003677]; DNA binding transcription factor activity [GO:0003700]; negative regulation of abscisic acid-activated signaling pathway [GO:0009788]; response to wounding [GO:0009611]; transcription, DNA-templated [GO:0006351]
XLOC_043203	utg8071.58	utg8071|GWHAAAA00008673:240569-241469	CP_TkMS3	6.05612	44.8684	2.88923	7.42214	5e-05	0.0199376	yes	KVI02647.1	Protein of unknown function DUF4228 [Cynara cardunculus var. scolymus]	Q8Y6Z5	Probable transcriptional regulatory protein lmo1535	GO:0003677; GO:0005829; GO:0006351; GO:0006355	cytosol [GO:0005829]; DNA binding [GO:0003677]; regulation of transcription, DNA-templated [GO:0006355]; transcription, DNA-templated [GO:0006351]
XLOC_043493	utg8190.13	utg8190|GWHAAAA00019845:64770-66693	CP_TkMS3	40.9726	11.4944	-1.83373	-4.52078	0.00015	0.0453938	yes	XP_023772179.1	tubulin beta chain-like [Lactuca sativa]	P18025	Tubulin beta-1 chain (Beta-1-tubulin)	GO:0003924; GO:0005200; GO:0005525; GO:0005737; GO:0005874; GO:0007017	cytoplasm [GO:0005737]; microtubule [GO:0005874]; GTP binding [GO:0005525]; GTPase activity [GO:0003924]; structural constituent of cytoskeleton [GO:0005200]; microtubule-based process [GO:0007017]
XLOC_044266	-	utg8559|GWHAAAA00025538:67816-68496	CP_TkMS3	1.81236	0	-Inf	NA	0.00015	0.0453938	yes	.	.	.	.	.	.
XLOC_044652	utg870.4	utg870|GWHAAAA00003469:17982-18515	CP_TkMS3	90.3351	19.7654	-2.19231	-7.83009	0.00015	0.0453938	yes	XP_010558975.1	PREDICTED: embryonic protein DC-8-like [Tarenaya hassleriana]	Q9SKP0	Late embryogenesis abundant protein ECP63 (Embryonic cell protein 63) (AtECP63) (LEA domain-containing protein ECP63)	GO:0005829	cytosol [GO:0005829]
XLOC_044998	utg8887.13	utg8887|GWHAAAA00004368:61789-63720	CP_TkMS3	36.1517	8.07054	-2.16332	-5.18159	5e-05	0.0199376	yes	KVH92741.1	AAA+ ATPase domain-containing protein [Cynara cardunculus var. scolymus]	Q9FLD5	AAA-ATPase ASD, mitochondrial (EC 3.6.1.3) (AAA-ATPase 1) (Protein ATPASE-IN-SEED-DEVELOPMENT)	GO:0005524; GO:0005739; GO:0005783; GO:0009409; GO:0009414; GO:0009651; GO:0009737; GO:0010154; GO:0010431; GO:0016021; GO:0016887; GO:0031966	endoplasmic reticulum [GO:0005783]; integral component of membrane [GO:0016021]; mitochondrial membrane [GO:0031966]; mitochondrion [GO:0005739]; ATP binding [GO:0005524]; ATPase activity [GO:0016887]; fruit development [GO:0010154]; response to abscisic acid [GO:0009737]; response to cold [GO:0009409]; response to salt stress [GO:0009651]; response to water deprivation [GO:0009414]; seed maturat…
XLOC_045200	utg896.5	utg896|GWHAAAA00020869:24702-26608	CP_TkMS3	66.1518	6.20464	-3.41436	-8.05778	5e-05	0.0199376	yes	XP_021974115.1	probable protein phosphatase 2C 25 [Helianthus annuus]	O80871	Probable protein phosphatase 2C 25 (AtPP2C25) (EC 3.1.3.16) (Protein phosphatase AP2C1)	GO:0004722; GO:0005634; GO:0009536; GO:0009611; GO:0009620; GO:0009738; GO:0046872; GO:0050832	nucleus [GO:0005634]; plastid [GO:0009536]; metal ion binding [GO:0046872]; protein serine/threonine phosphatase activity [GO:0004722]; abscisic acid-activated signaling pathway [GO:0009738]; defense response to fungus [GO:0050832]; response to fungus [GO:0009620]; response to wounding [GO:0009611]
XLOC_045685	utg9166.1	utg9166|GWHAAAA00025233:2238-3888	CP_TkMS3	34.341	8.65068	-1.98905	-4.90164	5e-05	0.0199376	yes	KVH88699.1	hypothetical protein Ccrd_026043 [Cynara cardunculus var. scolymus]	Q48LV9	Ribosome maturation factor RimM	GO:0005840; GO:0006364; GO:0043022	ribosome [GO:0005840]; ribosome binding [GO:0043022]; rRNA processing [GO:0006364]
XLOC_046946	utg984.5	utg984|GWHAAAA00005922:13488-15411	CP_TkMS3	7.46092	44.3392	2.57116	6.58688	5e-05	0.0199376	yes	XP_022012053.1	calcyclin-binding protein-like [Helianthus annuus]	Q9CXW3	Calcyclin-binding protein (CacyBP) (Siah-interacting protein)	GO:0005641; GO:0005654; GO:0005737; GO:0005829; GO:0007568; GO:0019005; GO:0019904; GO:0030877; GO:0031625; GO:0042803; GO:0043005; GO:0044297; GO:0045740; GO:0055007; GO:0060416; GO:0060548; GO:0070062; GO:0071277; GO:1990830	beta-catenin destruction complex [GO:0030877]; cell body [GO:0044297]; cytoplasm [GO:0005737]; cytosol [GO:0005829]; extracellular exosome [GO:0070062]; neuron projection [GO:0043005]; nuclear envelope lumen [GO:0005641]; nucleoplasm [GO:0005654]; SCF ubiquitin ligase complex [GO:0019005]; protein domain specific binding [GO:0019904]; protein homodimerization activity [GO:0042803]; ubiquitin prot…
XLOC_047061	utg9904.21	utg9904|GWHAAAA00015797:95429-98666	CP_TkMS3	1.00591	5.78698	2.52431	4.91207	0.00015	0.0453938	yes	KVI10065.1	Alcohol dehydrogenase, C-terminal [Cynara cardunculus var. scolymus]	P43903	Quinone oxidoreductase (EC 1.6.5.5) (NADPH:quinone reductase)	GO:0003960; GO:0005829; GO:0008270; GO:0017091; GO:0034599	cytosol [GO:0005829]; AU-rich element binding [GO:0017091]; NADPH:quinone reductase activity [GO:0003960]; zinc ion binding [GO:0008270]; cellular response to oxidative stress [GO:0034599]
XLOC_047230	utg9.14	utg9|GWHAAAA00012088:70717-72021	CP_TkMS3	13.2691	64.4859	2.28091	6.16165	5e-05	0.0199376	yes	XP_022018066.1	uncharacterized protein LOC110917944 [Helianthus annuus]	Q5ZTI6	Probable sphingosine-1-phosphate lyase (S1PL) (SP-lyase) (SPL) (EC 4.1.2.27) (Sphingosine-1-phosphate aldolase)	GO:0008117; GO:0016831; GO:0019752; GO:0030170	carboxy-lyase activity [GO:0016831]; pyridoxal phosphate binding [GO:0030170]; sphinganine-1-phosphate aldolase activity [GO:0008117]; carboxylic acid metabolic process [GO:0019752]

## Sheet: Table_S3
Supplementary Table 3: DEGs in CP T2 vs. T1
XLOC_id	gene	locus	sample	value_T2	value_T1	log2(fold_change)	test_stat	p_value	FDR_p-value_correction	significant	Homology based description (NCBI_Entry_ID)	Homology based description NCBI (Protein names)	Homology based description (Uniprot_Entry_ID)	Homology based description UniProt (Protein names)	Gene ontology IDs	Gene ontology (GO)
XLOC_000285	utg10129.1	utg10129|GWHAAAA00001938:3636-9243	CP_TkMS2	40.4871	2.31632	-4.12755	-5.05913	5e-05	0.0195409	yes	XP_021988350.1	phospholipase D zeta 1-like [Helianthus annuus]	Q9M9W8	Phospholipase D zeta 2 (PLDzeta2) (EC 3.1.4.4) (Phospholipase D p2) (AtPLDp2) (Phospholipase D2 PHOX and PX-containing domain protein)	GO:0004630; GO:0005773; GO:0006654; GO:0006995; GO:0008610; GO:0009395; GO:0009733; GO:0016036; GO:0019375; GO:0035091; GO:0048017; GO:0048364; GO:0060627; GO:0070290	vacuole [GO:0005773]; N-acylphosphatidylethanolamine-specific phospholipase D activity [GO:0070290]; phosphatidylinositol binding [GO:0035091]; phospholipase D activity [GO:0004630]; cellular response to nitrogen starvation [GO:0006995]; cellular response to phosphate starvation [GO:0016036]; galactolipid biosynthetic process [GO:0019375]; inositol lipid-mediated signaling [GO:0048017]; lipid bio…
XLOC_000659	-	utg10317|GWHAAAA00000029:90279-91599	CP_TkMS2	0	1.01872	Inf	NA	0.0001	0.0337176	yes	.	.	.	.	.	.
XLOC_000668	utg10326.2	utg10326|GWHAAAA00018059:2890-4516	CP_TkMS2	58.5385	6.56817	-3.15582	-3.84969	0.0001	0.0337176	yes	XP_002275013.1	PREDICTED: protein C2-DOMAIN ABA-RELATED 11 [Vitis vinifera]	Q9FIK8	Protein C2-DOMAIN ABA-RELATED 11 [Cleaved into: Protein C2-DOMAIN ABA-RELATED 11, N-terminally processed]	GO:0005096; GO:0005543; GO:0005634; GO:0005773; GO:0005886; GO:0009738; GO:0009789; GO:0043547; GO:0046872	nucleus [GO:0005634]; plasma membrane [GO:0005886]; vacuole [GO:0005773]; GTPase activator activity [GO:0005096]; metal ion binding [GO:0046872]; phospholipid binding [GO:0005543]; abscisic acid-activated signaling pathway [GO:0009738]; positive regulation of abscisic acid-activated signaling pathway [GO:0009789]; positive regulation of GTPase activity [GO:0043547]
XLOC_000698	utg10336.3	utg10336|GWHAAAA00028123:22186-23402	CP_TkMS2	0	3.82215	Inf	NA	5e-05	0.0195409	yes	XP_021974146.1	cyclin-U4-1-like [Helianthus annuus]	O80513	Cyclin-U4-1 (CycU4;1) (Cyclin-P4.1) (CycP4;1)	GO:0000079; GO:0007049; GO:0019901; GO:0051301	protein kinase binding [GO:0019901]; cell cycle [GO:0007049]; cell division [GO:0051301]; regulation of cyclin-dependent protein serine/threonine kinase activity [GO:0000079]
XLOC_001391	-	utg10693|GWHAAAA00023963:52302-53181	CP_TkMS2	3.69638	0	-Inf	NA	5e-05	0.0195409	yes	.	.	.	.	.	.
XLOC_002544	utg11341.1	utg11341|GWHAAAA00020978:8554-12876	CP_TkMS2	43.8684	0.952476	-5.52536	-6.24893	5e-05	0.0195409	yes	AGE89405.1	cis-prenyltransferase CPT3 [Taraxacum brevicorniculatum]	Q8S2T1	Dehydrodolichyl diphosphate synthase 6 (Dedol-PP synthase 6) (EC 2.5.1.-)	GO:0002094; GO:0006486; GO:0016094	polyprenyltransferase activity [GO:0002094]; polyprenol biosynthetic process [GO:0016094]; protein glycosylation [GO:0006486]
XLOC_002865	utg11494.4	utg11494|GWHAAAA00029945:11765-13649	CP_TkMS2	2.97327	0	-Inf	NA	5e-05	0.0195409	yes	KVI00129.1	Alpha carbonic anhydrase [Cynara cardunculus var. scolymus]	Q8L817	Alpha carbonic anhydrase 7 (AtaCA7) (AtalphaCA7) (EC 4.2.1.1) (Alpha carbonate dehydratase 7)	GO:0004089; GO:0006730; GO:0008270; GO:0009570	chloroplast stroma [GO:0009570]; carbonate dehydratase activity [GO:0004089]; zinc ion binding [GO:0008270]; one-carbon metabolic process [GO:0006730]
XLOC_003450	utg11786.1	utg11786|GWHAAAA00021907:2203-3272	CP_TkMS2	72.6391	2.0526	-5.14522	-7.5448	0.00015	0.0452526	yes	KVI10189.1	Glycoside hydrolase, catalytic domain-containing protein, partial [Cynara cardunculus var. scolymus]	P36910	Acidic endochitinase SE2 (EC 3.2.1.14)	GO:0000272; GO:0004568; GO:0005615; GO:0006032	extracellular space [GO:0005615]; chitinase activity [GO:0004568]; chitin catabolic process [GO:0006032]; polysaccharide catabolic process [GO:0000272]
XLOC_003713	-	utg11934|GWHAAAA00012767:4962-6184	CP_TkMS2	0	3.14305	Inf	NA	5e-05	0.0195409	yes	.	.	.	.	.	.
XLOC_004404	utg12353.7	utg12353|GWHAAAA00006926:27979-29599	CP_TkMS2	2.86406	35.7629	3.64233	5.26504	0.00015	0.0452526	yes	XP_022012637.1	uncharacterized protein LOC110912260 [Helianthus annuus]	Q91XQ4	DNA-directed RNA polymerase II subunit GRINL1A (DNA-directed RNA polymerase II subunit M) (Glutamate receptor-like protein 1A)	GO:0003899; GO:0016591; GO:0043025; GO:0051685	DNA-directed RNA polymerase II, holoenzyme [GO:0016591]; neuronal cell body [GO:0043025]; DNA-directed 5'-3' RNA polymerase activity [GO:0003899]; maintenance of ER location [GO:0051685]
XLOC_005107	-	utg12802|GWHAAAA00007843:115811-116997	CP_TkMS2	2.02695	0	-Inf	NA	5e-05	0.0195409	yes	.	.	.	.	.	.
XLOC_006196	utg13383.9	utg13383|GWHAAAA00010342:48052-48760	CP_TkMS2	7.95377	0	-Inf	NA	5e-05	0.0195409	yes	KVE54953.1	hypothetical protein Ccrd_023946 [Cynara cardunculus var. scolymus]	Q9SW07	Protein GLUTAMINE DUMPER 2	GO:0006865; GO:0016021; GO:0080143	integral component of membrane [GO:0016021]; amino acid transport [GO:0006865]; regulation of amino acid export [GO:0080143]
XLOC_007299	utg14031.4	utg14031|GWHAAAA00007275:25386-26109	CP_TkMS2	36.9556	319.048	3.10991	5.84601	0.0001	0.0337176	yes	XP_021898216.1	arabinogalactan peptide 13-like [Carica papaya]	Q9LJD9	Arabinogalactan peptide 12 (AG-peptide 12)	GO:0005886; GO:0031225	anchored component of membrane [GO:0031225]; plasma membrane [GO:0005886]
XLOC_007855	utg1435.30	utg1435|GWHAAAA00005322:157616-158211	CP_TkMS2	4.06082	0	-Inf	NA	5e-05	0.0195409	yes	WP_046390657.1	hypothetical protein [Streptococcus uberis]	Q6NNP0	Autophagy-related protein 16	GO:0000045; GO:0000421; GO:0015031	autophagosome membrane [GO:0000421]; autophagosome assembly [GO:0000045]; protein transport [GO:0015031]
XLOC_008723	-	utg14893|GWHAAAA00011994:11973-12188	CP_TkMS2	40.5126	0	-Inf	NA	5e-05	0.0195409	yes	.	.	.	.	.	.
XLOC_009396	utg15326.2	utg15326|GWHAAAA00023685:20505-21356	CP_TkMS2	0	1.08104	Inf	NA	5e-05	0.0195409	yes	KVI12254.1	Protein of unknown function DUF1005 [Cynara cardunculus var. scolymus]	P49689	40S ribosomal protein S30	GO:0003735; GO:0005730; GO:0006412; GO:0022627	cytosolic small ribosomal subunit [GO:0022627]; nucleolus [GO:0005730]; structural constituent of ribosome [GO:0003735]; translation [GO:0006412]
XLOC_009414	-	utg1532|GWHAAAA00008368:199333-199790	CP_TkMS2	0	4.3596	Inf	NA	0.0001	0.0337176	yes	.	.	.	.	.	.
XLOC_009516	utg15402.16	utg15402|GWHAAAA00018068:127102-127789	CP_TkMS2	2.59709	0	-Inf	NA	5e-05	0.0195409	yes	KVI08956.1	Protein phosphatase 2C [Cynara cardunculus var. scolymus]	O81760	Probable protein phosphatase 2C 63 (AtPP2C63) (EC 3.1.3.16)	GO:0004722; GO:0046872	metal ion binding [GO:0046872]; protein serine/threonine phosphatase activity [GO:0004722]
XLOC_009773	utg15552.6	utg15552|GWHAAAA00031512:16750-17363	CP_TkMS2	0	3.49026	Inf	NA	5e-05	0.0195409	yes	KVH98707.1	hypothetical protein Ccrd_023069 [Cynara cardunculus var. scolymus]	Q5GVR6	Octanoyltransferase (EC 2.3.1.181) (Lipoate-protein ligase B) (Lipoyl/octanoyl transferase) (Octanoyl-[acyl-carrier-protein]-protein N-octanoyltransferase)	GO:0005737; GO:0009249; GO:0033819	cytoplasm [GO:0005737]; lipoyl(octanoyl) transferase activity [GO:0033819]; protein lipoylation [GO:0009249]
XLOC_010427	-	utg15995|GWHAAAA00010539:13652-14353	CP_TkMS2	2.77847	0	-Inf	NA	5e-05	0.0195409	yes	.	.	.	.	.	.
XLOC_010466	utg16008.1	utg16008|GWHAAAA00000046:7113-8822	CP_TkMS2	0.970677	0	-Inf	NA	5e-05	0.0195409	yes	KVH96842.1	General substrate transporter [Cynara cardunculus var. scolymus]	Q41144	Sugar carrier protein C	GO:0008643; GO:0015293; GO:0016021	integral component of membrane [GO:0016021]; symporter activity [GO:0015293]; carbohydrate transport [GO:0008643]
XLOC_010868	utg16240.3	utg16240|GWHAAAA00024132:14566-15720	CP_TkMS2	5.02659	72.8766	3.8578	6.01884	5e-05	0.0195409	yes	KVI08024.1	Late embryogenesis abundant protein, LEA-14 [Cynara cardunculus var. scolymus]	Q9ZVD2	NDR1/HIN1-like protein 13	GO:0005886; GO:0009506; GO:0016021; GO:0042742	integral component of membrane [GO:0016021]; plasma membrane [GO:0005886]; plasmodesma [GO:0009506]; defense response to bacterium [GO:0042742]
XLOC_011039	utg16353.2	utg16353|GWHAAAA00027218:8634-9059	CP_TkMS2	0	18.5661	Inf	NA	5e-05	0.0195409	yes	XP_022006695.1	remorin-like [Helianthus annuus]	P93788	Remorin (pp34)	GO:0005886; GO:0007267; GO:0048032	plasma membrane [GO:0005886]; galacturonate binding [GO:0048032]; cell-cell signaling [GO:0007267]
XLOC_011107	utg163.6	utg163|GWHAAAA00020867:24079-25811	CP_TkMS2	0	0.795189	Inf	NA	0.00015	0.0452526	yes	XP_022015431.1	3-ketoacyl-CoA synthase 5-like [Helianthus annuus]	Q9XF43	3-ketoacyl-CoA synthase 6 (KCS-6) (EC 2.3.1.199) (Cuticular protein 1) (Eceriferum 6) (Very long-chain fatty acid condensing enzyme 6) (VLCFA condensing enzyme 6)	GO:0005783; GO:0005789; GO:0006633; GO:0009409; GO:0009416; GO:0009826; GO:0010025; GO:0016021; GO:0102336; GO:0102337; GO:0102338; GO:0102756	endoplasmic reticulum [GO:0005783]; endoplasmic reticulum membrane [GO:0005789]; integral component of membrane [GO:0016021]; 3-oxo-arachidoyl-CoA synthase activity [GO:0102336]; 3-oxo-cerotoyl-CoA synthase activity [GO:0102337]; 3-oxo-lignoceronyl-CoA synthase activity [GO:0102338]; very-long-chain 3-ketoacyl-CoA synthase activity [GO:0102756]; fatty acid biosynthetic process [GO:0006633]; respo…
XLOC_011629	utg16712.3	utg16712|GWHAAAA00005000:19551-20323	CP_TkMS2	1.8801	0	-Inf	NA	5e-05	0.0195409	yes	XP_017232453.1	PREDICTED: ribosomal RNA processing protein 36 homolog [Daucus carota subsp. sativus]	A7SL20	Ribosomal RNA processing protein 36 homolog	GO:0000462; GO:0000469; GO:0005730; GO:0030686	90S preribosome [GO:0030686]; nucleolus [GO:0005730]; cleavage involved in rRNA processing [GO:0000469]; maturation of SSU-rRNA from tricistronic rRNA transcript (SSU-rRNA, 5.8S rRNA, LSU-rRNA) [GO:0000462]
XLOC_012658	utg1748.8	utg1748|GWHAAAA00013465:47468-50562	CP_TkMS2	219.395	14.5788	-3.91158	-4.78957	5e-05	0.0195409	yes	KVH97050.1	Glucose/ribitol dehydrogenase [Cynara cardunculus var. scolymus]	Q94KL7	Secoisolariciresinol dehydrogenase (EC 1.1.1.331) (Fragment)	GO:0016491	oxidoreductase activity [GO:0016491]
XLOC_012717	-	utg17543|GWHAAAA00011925:14997-15683	CP_TkMS2	2.96195	0	-Inf	NA	5e-05	0.0195409	yes	.	.	.	.	.	.
XLOC_012808	utg175.5	utg175|GWHAAAA00010649:14280-18106	CP_TkMS2	184.89	11.1299	-4.05415	-4.50328	0.00015	0.0452526	yes	KVI01234.1	Zinc finger, RING/FYVE/PHD-type [Cynara cardunculus var. scolymus]	Q6GPV5	E3 ubiquitin-protein ligase RNF181 (EC 2.3.2.27) (RING finger protein 181) (RING-type E3 ubiquitin transferase RNF181)	GO:0016567; GO:0016740; GO:0046872	metal ion binding [GO:0046872]; transferase activity [GO:0016740]; protein ubiquitination [GO:0016567]
XLOC_013380	utg17977.13	utg17977|GWHAAAA00005143:57675-61649	CP_TkMS2	2.02517	0	-Inf	NA	5e-05	0.0195409	yes	KVH93949.1	Cupin 1 [Cynara cardunculus var. scolymus]	Q6K5Q0	Putative germin-like protein 2-1	GO:0005618; GO:0030145; GO:0045735; GO:0048046	apoplast [GO:0048046]; cell wall [GO:0005618]; manganese ion binding [GO:0030145]; nutrient reservoir activity [GO:0045735]
XLOC_013485	utg1804.4	utg1804|GWHAAAA00010047:22367-24430	CP_TkMS2	140.383	6.62581	-4.40513	-5.35512	5e-05	0.0195409	yes	XP_022036199.1	uncharacterized protein LOC110938033 [Helianthus annuus]	P32295	Indole-3-acetic acid-induced protein ARG7	GO:0009733	response to auxin [GO:0009733]
XLOC_013748	utg18242.11	utg18242|GWHAAAA00008127:32927-35304	CP_TkMS2	151.934	12.392	-3.61597	-4.17318	0.00015	0.0452526	yes	KVH98322.1	hypothetical protein Ccrd_023470 [Cynara cardunculus var. scolymus]	Q9FMH8	Probable cysteine protease RD21B (EC 3.4.22.-)	GO:0004197; GO:0005615; GO:0005764; GO:0005773; GO:0005783; GO:0005829; GO:0009651; GO:0051603	cytosol [GO:0005829]; endoplasmic reticulum [GO:0005783]; extracellular space [GO:0005615]; lysosome [GO:0005764]; vacuole [GO:0005773]; cysteine-type endopeptidase activity [GO:0004197]; proteolysis involved in cellular protein catabolic process [GO:0051603]; response to salt stress [GO:0009651]
XLOC_013811	utg1827.12	utg1827|GWHAAAA00008521:80272-82207	CP_TkMS2	0	0.620257	Inf	NA	5e-05	0.0195409	yes	KVH91652.1	Pentatricopeptide repeat-containing protein [Cynara cardunculus var. scolymus]	Q9C6T2	Pentatricopeptide repeat-containing protein At1g31920	GO:0003723; GO:0004519; GO:0008270; GO:0009451; GO:0043231	intracellular membrane-bounded organelle [GO:0043231]; endonuclease activity [GO:0004519]; RNA binding [GO:0003723]; zinc ion binding [GO:0008270]; RNA modification [GO:0009451]
XLOC_013886	utg18320.12	utg18320|GWHAAAA00003431:42315-44306	CP_TkMS2	0.972476	0	-Inf	NA	0.0001	0.0337176	yes	XP_021998414.1	uncharacterized protein LOC110895412 [Helianthus annuus]	P50846	KHG/KDPG aldolase [Includes: 4-hydroxy-2-oxoglutarate aldolase (EC 4.1.3.16) (2-keto-4-hydroxyglutarate aldolase) (KHG-aldolase); 2-dehydro-3-deoxy-phosphogluconate aldolase (EC 4.1.2.14) (2-keto-3-deoxy-6-phosphogluconate aldolase) (KDPG-aldolase) (Phospho-2-dehydro-3-deoxygluconate aldolase) (Phospho-2-keto-3-deoxygluconate aldolase)]	GO:0005737; GO:0008152; GO:0008675; GO:0008700	cytoplasm [GO:0005737]; 2-dehydro-3-deoxy-phosphogluconate aldolase activity [GO:0008675]; 4-hydroxy-2-oxoglutarate aldolase activity [GO:0008700]; metabolic process [GO:0008152]
XLOC_014010	utg18424.3	utg18424|GWHAAAA00006453:8860-10855	CP_TkMS2	1.41633	0	-Inf	NA	5e-05	0.0195409	yes	KVH96323.1	Protein of unknown function DUF1262 [Cynara cardunculus var. scolymus]	Q9RC40	Flavohemoprotein (Flavohemoglobin) (Hemoglobin-like protein) (Nitric oxide dioxygenase) (NO oxygenase) (NOD) (EC 1.14.12.17)	GO:0005344; GO:0008941; GO:0009636; GO:0019825; GO:0020037; GO:0046872; GO:0051409; GO:0071949	FAD binding [GO:0071949]; heme binding [GO:0020037]; metal ion binding [GO:0046872]; nitric oxide dioxygenase activity [GO:0008941]; oxygen binding [GO:0019825]; oxygen carrier activity [GO:0005344]; response to nitrosative stress [GO:0051409]; response to toxic substance [GO:0009636]
XLOC_015681	-	utg19612|GWHAAAA00002156:322-1323	CP_TkMS2	1.57556	0	-Inf	NA	5e-05	0.0195409	yes	.	.	.	.	.	.
XLOC_015785	utg1969.13	utg1969|GWHAAAA00008875:76611-78555	CP_TkMS2	0	1.12321	Inf	NA	5e-05	0.0195409	yes	KVH91652.1	Pentatricopeptide repeat-containing protein [Cynara cardunculus var. scolymus]	Q9C6T2	Pentatricopeptide repeat-containing protein At1g31920	GO:0003723; GO:0004519; GO:0008270; GO:0009451; GO:0043231	intracellular membrane-bounded organelle [GO:0043231]; endonuclease activity [GO:0004519]; RNA binding [GO:0003723]; zinc ion binding [GO:0008270]; RNA modification [GO:0009451]
XLOC_016668	utg20347.5	utg20347|GWHAAAA00006604:14139-15446	CP_TkMS2	111.027	7.35986	-3.91509	-6.08517	5e-05	0.0195409	yes	XP_022029426.1	protein DMR6-LIKE OXYGENASE 2-like [Helianthus annuus]	Q9ZSA7	Protein DMR6-LIKE OXYGENASE 2 (EC 1.14.11.-) (2-oxoglutarate (2OG)-Fe(II) oxygenase-like protein DLO2) (Salicylate 3-hydroxylase DLO2) (S3H DLO2) (SA 3-hydroxylase DLO2) (Salicylic acid 3-hydroxylase DLO2) (EC 1.14.13.-)	GO:0002229; GO:0046244; GO:0046872; GO:0051213	dioxygenase activity [GO:0051213]; metal ion binding [GO:0046872]; defense response to oomycetes [GO:0002229]; salicylic acid catabolic process [GO:0046244]
XLOC_016731	utg20394.6	utg20394|GWHAAAA00023298:16646-19792	CP_TkMS2	303.954	7.12046	-5.41574	-7.31339	5e-05	0.0195409	yes	XP_021997932.1	WAT1-related protein At2g39510-like [Helianthus annuus]	O80638	WAT1-related protein At2g39510	GO:0005886; GO:0015186; GO:0016021; GO:0044746; GO:0048316; GO:0080144; GO:0098712	integral component of membrane [GO:0016021]; plasma membrane [GO:0005886]; L-glutamine transmembrane transporter activity [GO:0015186]; amino acid homeostasis [GO:0080144]; amino acid transmembrane export [GO:0044746]; L-glutamate import across plasma membrane [GO:0098712]; seed development [GO:0048316]
XLOC_017297	-	utg20811|GWHAAAA00007219:21224-21988	CP_TkMS2	3.30421	0	-Inf	NA	5e-05	0.0195409	yes	.	.	.	.	.	.
XLOC_017392	utg20876.1	utg20876|GWHAAAA00012784:13056-14703	CP_TkMS2	1.29083	0	-Inf	NA	5e-05	0.0195409	yes	KVI02991.1	AMP-binding, conserved site-containing protein, partial [Cynara cardunculus var. scolymus]	Q9SFW5	Probable acyl-activating enzyme 21 (EC 6.2.1.-)	GO:0006631; GO:0016874	ligase activity [GO:0016874]; fatty acid metabolic process [GO:0006631]
XLOC_017536	-	utg21011|GWHAAAA00004738:19087-21214	CP_TkMS2	0.571034	0	-Inf	NA	0.00015	0.0452526	yes	.	.	.	.	.	.
XLOC_017762	utg21197.2	utg21197|GWHAAAA00012848:6251-23771	CP_TkMS2	139.433	3.31451	-5.39463	-5.83723	5e-05	0.0195409	yes	OTG04183.1	putative glucose/ribitol dehydrogenase [Helianthus annuus]	Q5KTS5	Glucose and ribitol dehydrogenase (EC 1.1.1.-) (Carrot ABA-induced in somatic embryos 5 protein)	GO:0016491	oxidoreductase activity [GO:0016491]
XLOC_018246	utg21652.5	utg21652|GWHAAAA00030719:26814-28659	CP_TkMS2	84.4027	7.85975	-3.42473	-5.14642	5e-05	0.0195409	yes	KVH98511.1	No apical meristem (NAM) protein [Cynara cardunculus var. scolymus]	Q9FLJ2	NAC domain-containing protein 100 (ANAC100) (AtNAC5)	GO:0003677; GO:0003700; GO:0005634; GO:0006351	nucleus [GO:0005634]; DNA binding [GO:0003677]; DNA binding transcription factor activity [GO:0003700]; transcription, DNA-templated [GO:0006351]
XLOC_018301	utg21698.10	utg21698|GWHAAAA00022102:47576-54924	CP_TkMS2	140.317	6.6857	-4.39147	-4.95308	5e-05	0.0195409	yes	KVI03024.1	BRCT domain-containing protein [Cynara cardunculus var. scolymus]	Q7XD82	Nijmegen breakage syndrome 1 protein (OsNbs1)	GO:0000724; GO:0000784; GO:0003684; GO:0006312; GO:0006974; GO:0007095; GO:0007131; GO:0016233; GO:0016605; GO:0030870; GO:0032508; GO:0042770; GO:0071479	Mre11 complex [GO:0030870]; nuclear chromosome, telomeric region [GO:0000784]; PML body [GO:0016605]; damaged DNA binding [GO:0003684]; cellular response to DNA damage stimulus [GO:0006974]; cellular response to ionizing radiation [GO:0071479]; DNA duplex unwinding [GO:0032508]; double-strand break repair via homologous recombination [GO:0000724]; mitotic G2 DNA damage checkpoint [GO:0007095]; mi…
XLOC_019426	-	utg2265|GWHAAAA00018117:23479-24551	CP_TkMS2	0	1.20113	Inf	NA	0.00015	0.0452526	yes	.	.	.	.	.	.
XLOC_019609	utg22813.1	utg22813|GWHAAAA00024298:2568-3932	CP_TkMS2	49.4305	2.18353	-4.50067	-6.58427	0.0001	0.0337176	yes	XP_022038540.1	1,4-dihydroxy-2-naphthoyl-CoA thioesterase 1-like [Helianthus annuus]	Q9SX65	1,4-dihydroxy-2-naphthoyl-CoA thioesterase 1 (AtDHNAT1) (DHNA-CoA thioesterase 1) (EC 3.1.2.-)	GO:0005777; GO:0016787; GO:0042372; GO:0051289	peroxisome [GO:0005777]; hydrolase activity [GO:0016787]; phylloquinone biosynthetic process [GO:0042372]; protein homotetramerization [GO:0051289]
XLOC_020284	-	utg23344|GWHAAAA00020423:8080-12707	CP_TkMS2	91.0243	0.921859	-6.62556	-7.44812	5e-05	0.0195409	yes	.	.	.	.	.	.
XLOC_021683	utg2468.1	utg2468|GWHAAAA00014736:1794-3282	CP_TkMS2	7.57404	73.0441	3.26963	4.08459	5e-05	0.0195409	yes	XP_021971359.1	uncharacterized protein LOC110866520 [Helianthus annuus]	P0C2F6	Putative ribonuclease H protein At1g65750 (EC 3.1.26.4)	GO:0003676; GO:0004523; GO:0046872	metal ion binding [GO:0046872]; nucleic acid binding [GO:0003676]; RNA-DNA hybrid ribonuclease activity [GO:0004523]
XLOC_021793	-	utg24801|GWHAAAA00020327:20688-21634	CP_TkMS2	10.5591	0	-Inf	NA	5e-05	0.0195409	yes	.	.	.	.	.	.
XLOC_022058	-	utg2506|GWHAAAA00012344:487-1965	CP_TkMS2	0	1.99842	Inf	NA	5e-05	0.0195409	yes	.	.	.	.	.	.
XLOC_022201	utg2520.1	utg2520|GWHAAAA00011463:7114-9843	CP_TkMS2	4.05009	38.4061	3.24531	3.97803	0.0001	0.0337176	yes	KVH90087.1	BAG domain-containing protein [Cynara cardunculus var. scolymus]	Q0WUQ1	BAG family molecular chaperone regulator 1 (Bcl-2-associated athanogene 1)	GO:0005634; GO:0005739; GO:0005829; GO:0051087; GO:0071629	cytosol [GO:0005829]; mitochondrion [GO:0005739]; nucleus [GO:0005634]; chaperone binding [GO:0051087]; cytoplasm protein quality control by the ubiquitin-proteasome system [GO:0071629]
XLOC_022254	-	utg25270|GWHAAAA00012555:918-3640	CP_TkMS2	25.9621	1.68249	-3.94774	-5.31281	5e-05	0.0195409	yes	.	.	.	.	.	.
XLOC_022713	utg2570.3	utg2570|GWHAAAA00008155:12576-15131	CP_TkMS2	6.79083	98.1332	3.85308	4.69294	5e-05	0.0195409	yes	KVH93660.1	AAA+ ATPase domain-containing protein [Cynara cardunculus var. scolymus]	Q9FKM3	AAA-ATPase At5g57480 (EC 3.6.1.3)	GO:0005524; GO:0016887	ATP binding [GO:0005524]; ATPase activity [GO:0016887]
XLOC_022723	utg25710.12	utg25710|GWHAAAA00009613:50817-55781	CP_TkMS2	1.41416	0	-Inf	NA	5e-05	0.0195409	yes	KVI01106.1	Concanavalin A-like lectin/glucanase, subgroup [Cynara cardunculus var. scolymus]	Q9UJT9	F-box/LRR-repeat protein 7 (F-box and leucine-rich repeat protein 7) (F-box protein FBL6/FBL7)	GO:0000086; GO:0000151; GO:0000209; GO:0000278; GO:0004842; GO:0005813; GO:0005829; GO:0006511; GO:0008283; GO:0010265; GO:0010972; GO:0016567; GO:0019005; GO:0031146; GO:0043687; GO:0051301	centrosome [GO:0005813]; cytosol [GO:0005829]; SCF ubiquitin ligase complex [GO:0019005]; ubiquitin ligase complex [GO:0000151]; ubiquitin-protein transferase activity [GO:0004842]; cell division [GO:0051301]; cell proliferation [GO:0008283]; G2/M transition of mitotic cell cycle [GO:0000086]; mitotic cell cycle [GO:0000278]; negative regulation of G2/M transition of mitotic cell cycle [GO:001097…
XLOC_022848	utg25849.1	utg25849|GWHAAAA00008201:1949-2791	CP_TkMS2	2.46225	0	-Inf	NA	5e-05	0.0195409	yes	XP_022000100.1	tryptophan aminotransferase-related protein 3-like [Helianthus annuus]	Q93Z38	Tryptophan aminotransferase-related protein 4 (EC 2.6.1.-)	GO:0008483; GO:0016021; GO:0016846	integral component of membrane [GO:0016021]; carbon-sulfur lyase activity [GO:0016846]; transaminase activity [GO:0008483]
XLOC_023321	utg26340.10	utg26340|GWHAAAA00028933:47882-50973	CP_TkMS2	159.05	12.6583	-3.65132	-4.49635	5e-05	0.0195409	yes	XP_011101969.1	eukaryotic translation initiation factor 5A [Sesamum indicum]	Q9AXJ4	Eukaryotic translation initiation factor 5A (eIF-5A)	GO:0003743; GO:0003746; GO:0006452; GO:0043022; GO:0045901; GO:0045905	ribosome binding [GO:0043022]; translation elongation factor activity [GO:0003746]; translation initiation factor activity [GO:0003743]; positive regulation of translational elongation [GO:0045901]; positive regulation of translational termination [GO:0045905]; translational frameshifting [GO:0006452]
XLOC_023912	-	utg26968|GWHAAAA00012333:12601-13447	CP_TkMS2	2.77169	0	-Inf	NA	5e-05	0.0195409	yes	.	.	.	.	.	.
XLOC_025760	utg2887.16	utg2887|GWHAAAA00016059:71579-73510	CP_TkMS2	121.314	6.19658	-4.29113	-6.46402	5e-05	0.0195409	yes	XP_022039448.1	protein LHCP TRANSLOCATION DEFECT [Helianthus annuus]	Q8VY88	Protein LHCP TRANSLOCATION DEFECT (Protein GRANA-DEFICIENT CHLOROPLAST 1)	GO:0006886; GO:0009507; GO:0009535; GO:0009570; GO:0009941; GO:0080167; GO:0090391	chloroplast [GO:0009507]; chloroplast envelope [GO:0009941]; chloroplast stroma [GO:0009570]; chloroplast thylakoid membrane [GO:0009535]; granum assembly [GO:0090391]; intracellular protein transport [GO:0006886]; response to karrikin [GO:0080167]
XLOC_025864	-	utg28970|GWHAAAA00005707:10712-11775	CP_TkMS2	2.23345	0	-Inf	NA	5e-05	0.0195409	yes	.	.	.	.	.	.
XLOC_027320	-	utg30539|GWHAAAA00022681:3567-4433	CP_TkMS2	3.7688	0	-Inf	NA	5e-05	0.0195409	yes	.	.	.	.	.	.
XLOC_027533	utg3079.5	utg3079|GWHAAAA00004224:14445-15790	CP_TkMS2	0	1.25782	Inf	NA	5e-05	0.0195409	yes	XP_022009892.1	expansin-A13 [Helianthus annuus]	Q9M9P0	Expansin-A13 (AtEXPA13) (Alpha-expansin-13) (At-EXP13) (AtEx13) (Ath-ExpAlpha-1.22)	GO:0005576; GO:0005618; GO:0009664; GO:0016020	cell wall [GO:0005618]; extracellular region [GO:0005576]; membrane [GO:0016020]; plant-type cell wall organization [GO:0009664]
XLOC_028320	utg31706.6	utg31706|GWHAAAA00015103:21862-23909	CP_TkMS2	131.536	6.83425	-4.26653	-6.77221	5e-05	0.0195409	yes	XP_021998463.1	protein ABA DEFICIENT 4, chloroplastic isoform X1 [Helianthus annuus]	Q8LFP9	Protein ABA DEFICIENT 4, chloroplastic	GO:0009688; GO:0009941; GO:0016021; GO:0016122; GO:0031969; GO:0032928	chloroplast envelope [GO:0009941]; chloroplast membrane [GO:0031969]; integral component of membrane [GO:0016021]; abscisic acid biosynthetic process [GO:0009688]; regulation of superoxide anion generation [GO:0032928]; xanthophyll metabolic process [GO:0016122]
XLOC_028425	utg31865.2	utg31865|GWHAAAA00026628:1442-2457	CP_TkMS2	227.826	14.3973	-3.98406	-6.44276	5e-05	0.0195409	yes	KVI05932.1	Protein of unknown function DUF761, plant [Cynara cardunculus var. scolymus]	P11982	Tyrosine 3-monooxygenase (EC 1.14.16.2) (Tyrosine 3-hydroxylase) (TH)	GO:0004511; GO:0005506; GO:0005623; GO:0005737; GO:0007619; GO:0007625; GO:0009072; GO:0035176; GO:0042136; GO:0042416; GO:0051705; GO:0060416; GO:0071625	cell [GO:0005623]; cytoplasm [GO:0005737]; iron ion binding [GO:0005506]; tyrosine 3-monooxygenase activity [GO:0004511]; aromatic amino acid family metabolic process [GO:0009072]; courtship behavior [GO:0007619]; dopamine biosynthetic process [GO:0042416]; grooming behavior [GO:0007625]; multi-organism behavior [GO:0051705]; neurotransmitter biosynthetic process [GO:0042136]; response to growth …
XLOC_028866	utg32416.2	utg32416|GWHAAAA00030611:6868-9986	CP_TkMS2	0	1.42726	Inf	NA	5e-05	0.0195409	yes	KVI08744.1	Zinc finger, RING/FYVE/PHD-type, partial [Cynara cardunculus var. scolymus]	Q8GT75	NEP1-interacting protein 1 (RING-H2 finger protein ATL26)	GO:0009535; GO:0016021; GO:0043161; GO:0046872; GO:0061630	chloroplast thylakoid membrane [GO:0009535]; integral component of membrane [GO:0016021]; metal ion binding [GO:0046872]; ubiquitin protein ligase activity [GO:0061630]; proteasome-mediated ubiquitin-dependent protein catabolic process [GO:0043161]
XLOC_029191	-	utg3287|GWHAAAA00000403:26093-29616	CP_TkMS2	0	1.22421	Inf	NA	5e-05	0.0195409	yes	.	.	.	.	.	.
XLOC_029934	utg3386.9	utg3386|GWHAAAA00003474:56446-58672	CP_TkMS2	70.885	4.46146	-3.98989	-4.92333	5e-05	0.0195409	yes	KVI06163.1	SWEET sugar transporter [Cynara cardunculus var. scolymus]	O82587	Bidirectional sugar transporter SWEET12 (AtSWEET12) (MtN3-like protein) (Protein SUGARS WILL EVENTUALLY BE EXPORTED TRANSPORTERS 12)	GO:0005886; GO:0005887; GO:0008515; GO:0009793; GO:0010431; GO:0015770; GO:0016021; GO:0051119; GO:0051260	integral component of membrane [GO:0016021]; integral component of plasma membrane [GO:0005887]; plasma membrane [GO:0005886]; sucrose transmembrane transporter activity [GO:0008515]; sugar transmembrane transporter activity [GO:0051119]; embryo development ending in seed dormancy [GO:0009793]; protein homooligomerization [GO:0051260]; seed maturation [GO:0010431]; sucrose transport [GO:0015770]
XLOC_029940	utg3386.9	utg3386|GWHAAAA00003474:58968-59649	CP_TkMS2	2.17864	0	-Inf	NA	0.0001	0.0337176	yes	KVI06163.1	SWEET sugar transporter [Cynara cardunculus var. scolymus]	O82587	Bidirectional sugar transporter SWEET12 (AtSWEET12) (MtN3-like protein) (Protein SUGARS WILL EVENTUALLY BE EXPORTED TRANSPORTERS 12)	GO:0005886; GO:0005887; GO:0008515; GO:0009793; GO:0010431; GO:0015770; GO:0016021; GO:0051119; GO:0051260	integral component of membrane [GO:0016021]; integral component of plasma membrane [GO:0005887]; plasma membrane [GO:0005886]; sucrose transmembrane transporter activity [GO:0008515]; sugar transmembrane transporter activity [GO:0051119]; embryo development ending in seed dormancy [GO:0009793]; protein homooligomerization [GO:0051260]; seed maturation [GO:0010431]; sucrose transport [GO:0015770]
XLOC_031326	utg35750.4	utg35750|GWHAAAA00005093:14127-16520	CP_TkMS2	28.2837	1.7968	-3.97647	-4.73407	0.0001	0.0337176	yes	KVI12150.1	hypothetical protein Ccrd_009425 [Cynara cardunculus var. scolymus]	F8WKW1	7-deoxyloganetin glucosyltransferase (EC 2.4.1.324) (Genipin glucosyltransferase) (UDP-glucose glucosyltransferase 2) (GjUGT2) (UDP-glycosyltransferase 85A24)	GO:0008152; GO:0035251	UDP-glucosyltransferase activity [GO:0035251]; metabolic process [GO:0008152]
XLOC_033181	utg3989.4	utg3989|GWHAAAA00002184:21620-23624	CP_TkMS2	3.12234	38.3701	3.61928	5.12641	5e-05	0.0195409	yes	KVI08356.1	UDP-glucuronosyl/UDP-glucosyltransferase [Cynara cardunculus var. scolymus]	F8WKW0	Crocetin glucosyltransferase, chloroplastic (EC 2.4.1.271) (UDP-glucose glucosyltransferase 1) (GjUGT1) (UDP-glycosyltransferase 75L6)	GO:0008152; GO:0009507; GO:0016758	chloroplast [GO:0009507]; transferase activity, transferring hexosyl groups [GO:0016758]; metabolic process [GO:0008152]
XLOC_033377	utg4042.14	utg4042|GWHAAAA00008233:78898-80103	CP_TkMS2	1.11767	0	-Inf	NA	0.00015	0.0452526	yes	XP_021991333.1	uncharacterized protein LOC110888102 [Helianthus annuus]	P0C2F6	Putative ribonuclease H protein At1g65750 (EC 3.1.26.4)	GO:0003676; GO:0004523; GO:0046872	metal ion binding [GO:0046872]; nucleic acid binding [GO:0003676]; RNA-DNA hybrid ribonuclease activity [GO:0004523]
XLOC_034604	utg4498.5	utg4498|GWHAAAA00027184:18537-20051	CP_TkMS2	55.7248	5.79061	-3.26653	-5.00096	5e-05	0.0195409	yes	XP_022038540.1	1,4-dihydroxy-2-naphthoyl-CoA thioesterase 1-like [Helianthus annuus]	Q9SX65	1,4-dihydroxy-2-naphthoyl-CoA thioesterase 1 (AtDHNAT1) (DHNA-CoA thioesterase 1) (EC 3.1.2.-)	GO:0005777; GO:0016787; GO:0042372; GO:0051289	peroxisome [GO:0005777]; hydrolase activity [GO:0016787]; phylloquinone biosynthetic process [GO:0042372]; protein homotetramerization [GO:0051289]
XLOC_034743	utg4547.2	utg4547|GWHAAAA00023957:10038-11459	CP_TkMS2	130.511	4.95489	-4.71918	-7.33829	5e-05	0.0195409	yes	XP_022023104.1	uncharacterized protein LOC110923267 [Helianthus annuus]	Q5UQ88	Probable ubiquitin-conjugating enzyme E2 R521 (EC 2.3.2.23) (E2 ubiquitin-conjugating enzyme R521) (Ubiquitin carrier protein) (Ubiquitin-protein ligase)	GO:0005524; GO:0016021; GO:0016567; GO:0016740; GO:0042262	integral component of membrane [GO:0016021]; ATP binding [GO:0005524]; transferase activity [GO:0016740]; DNA protection [GO:0042262]; protein ubiquitination [GO:0016567]
XLOC_034782	utg4558.17	utg4558|GWHAAAA00003892:97223-98178	CP_TkMS2	166.433	10.4702	-3.99058	-6.62116	5e-05	0.0195409	yes	KVI05932.1	Protein of unknown function DUF761, plant [Cynara cardunculus var. scolymus]	A6L175	1-deoxy-D-xylulose-5-phosphate synthase (EC 2.2.1.7) (1-deoxyxylulose-5-phosphate synthase) (DXP synthase) (DXPS)	GO:0008661; GO:0009228; GO:0016114; GO:0046872; GO:0052865	1-deoxy-D-xylulose-5-phosphate synthase activity [GO:0008661]; metal ion binding [GO:0046872]; 1-deoxy-D-xylulose 5-phosphate biosynthetic process [GO:0052865]; terpenoid biosynthetic process [GO:0016114]; thiamine biosynthetic process [GO:0009228]
XLOC_034877	utg4584.12	utg4584|GWHAAAA00021112:38911-39786	CP_TkMS2	2.41568	0	-Inf	NA	5e-05	0.0195409	yes	KVI02927.1	Aspartic peptidase [Cynara cardunculus var. scolymus]	Q8VYV9	Aspartyl protease family protein 1 (EC 3.4.23.-)	GO:0004190; GO:0005886; GO:0006508; GO:0030163; GO:0031225	anchored component of membrane [GO:0031225]; plasma membrane [GO:0005886]; aspartic-type endopeptidase activity [GO:0004190]; protein catabolic process [GO:0030163]; proteolysis [GO:0006508]
XLOC_035724	utg489.1	utg489|GWHAAAA00008931:26-1295	CP_TkMS2	5.70593	84.169	3.88276	5.94644	5e-05	0.0195409	yes	XP_022035370.1	chlorophyll a-b binding protein of LHCII type 1-like [Helianthus annuus]	P27492	Chlorophyll a-b binding protein 16, chloroplastic (LHCII type I CAB-16) (LHCP)	GO:0009522; GO:0009523; GO:0009535; GO:0009765; GO:0016021; GO:0016168; GO:0018298; GO:0046872	chloroplast thylakoid membrane [GO:0009535]; integral component of membrane [GO:0016021]; photosystem I [GO:0009522]; photosystem II [GO:0009523]; chlorophyll binding [GO:0016168]; metal ion binding [GO:0046872]; photosynthesis, light harvesting [GO:0009765]; protein-chromophore linkage [GO:0018298]
XLOC_036231	utg5059.8	utg5059|GWHAAAA00029504:19594-32038	CP_TkMS2	25.4446	1.25889	-4.33713	-5.32217	5e-05	0.0195409	yes	KVH93104.1	Calcium-binding EF-hand [Cynara cardunculus var. scolymus]	Q6K3R5	Sodium/calcium exchanger NCL2 (Na(+)/Ca(2+)-exchange protein NCL2) (OsEFCAX2) (Protein NCX-like 2) (OsNCL2)	GO:0005432; GO:0005509; GO:0005886; GO:0016021; GO:0055074	integral component of membrane [GO:0016021]; plasma membrane [GO:0005886]; calcium ion binding [GO:0005509]; calcium:sodium antiporter activity [GO:0005432]; calcium ion homeostasis [GO:0055074]
XLOC_036451	-	utg5151|GWHAAAA00012821:925-2289	CP_TkMS2	0	1.12828	Inf	NA	5e-05	0.0195409	yes	.	.	.	.	.	.
XLOC_036526	utg5187.9	utg5187|GWHAAAA00010723:30718-37443	CP_TkMS2	206.366	4.70465	-5.45498	-5.5003	5e-05	0.0195409	yes	XP_001429586.1	hypothetical protein [Paramecium tetraurelia strain d4-2]	.	.	.	.
XLOC_036965	-	utg5348|GWHAAAA00000537:99388-105244	CP_TkMS2	28.5124	1.59696	-4.15819	-4.52019	5e-05	0.0195409	yes	.	.	.	.	.	.
XLOC_036996	utg5356.10	utg5356|GWHAAAA00000019:29094-29809	CP_TkMS2	0	2.05279	Inf	NA	0.0001	0.0337176	yes	XP_022034077.1	auxin-responsive protein SAUR21-like [Helianthus annuus]	Q9FK62	Auxin-responsive protein SAUR24 (Protein SMALL AUXIN UP RNA 24)	GO:0005886; GO:0007275; GO:0009734; GO:0040008	plasma membrane [GO:0005886]; auxin-activated signaling pathway [GO:0009734]; multicellular organism development [GO:0007275]; regulation of growth [GO:0040008]
XLOC_037193	-	utg5457|GWHAAAA00012756:52892-53286	CP_TkMS2	9.3431	0	-Inf	NA	5e-05	0.0195409	yes	.	.	.	.	.	.
XLOC_037297	utg5477.14	utg5477|GWHAAAA00001923:39926-42057	CP_TkMS2	31.84	2.52391	-3.65711	-5.2057	0.00015	0.0452526	yes	KVI06707.1	Glycoside hydrolase, catalytic domain-containing protein, partial [Cynara cardunculus var. scolymus]	Q6YM50	Mannan endo-1,4-beta-mannosidase 5 (EC 3.2.1.78) (Beta-mannanase 5) (Endo-beta-1,4-mannanase 5) (LeMAN5)	GO:0005576; GO:0005975; GO:0016985	extracellular region [GO:0005576]; mannan endo-1,4-beta-mannosidase activity [GO:0016985]; carbohydrate metabolic process [GO:0005975]
XLOC_038122	utg5800.3	utg5800|GWHAAAA00019989:18743-20346	CP_TkMS2	219.291	16.0876	-3.76883	-6.03755	5e-05	0.0195409	yes	AAC49326.1	wounding-induced ribonuclease gene [Zinnia violacea]	P80022	Extracellular ribonuclease LE (RNase LE) (EC 3.1.27.1)	GO:0003723; GO:0005615; GO:0005618; GO:0033897	cell wall [GO:0005618]; extracellular space [GO:0005615]; ribonuclease T2 activity [GO:0033897]; RNA binding [GO:0003723]
XLOC_038582	utg599.7	utg599|GWHAAAA00020956:32118-33914	CP_TkMS2	108.113	10.7142	-3.33494	-5.03842	0.00015	0.0452526	yes	XP_022034965.1	F-box protein SKIP19-like [Helianthus annuus]	Q9M0U9	F-box protein SKIP19 (F-box/LRR-repeat protein 20) (SKP1-interacting partner 19)	GO:0005634; GO:0016567	nucleus [GO:0005634]; protein ubiquitination [GO:0016567]
XLOC_040050	utg6720.7	utg6720|GWHAAAA00018781:9236-10359	CP_TkMS2	0	3.88383	Inf	NA	5e-05	0.0195409	yes	OTG25363.1	Protein of unknown function (DUF241) [Helianthus annuus]	P32604	Fructose-2,6-bisphosphatase (EC 3.1.3.46)	GO:0004331; GO:0005524; GO:0006000; GO:0006003; GO:0006006	ATP binding [GO:0005524]; fructose-2,6-bisphosphate 2-phosphatase activity [GO:0004331]; fructose 2,6-bisphosphate metabolic process [GO:0006003]; fructose metabolic process [GO:0006000]; glucose metabolic process [GO:0006006]
XLOC_040864	-	utg7037|GWHAAAA00008383:27585-28891	CP_TkMS2	0	1.36706	Inf	NA	5e-05	0.0195409	yes	.	.	.	.	.	.
XLOC_041005	-	utg7100|GWHAAAA00013824:28502-29908	CP_TkMS2	0	1.42436	Inf	NA	5e-05	0.0195409	yes	.	.	.	.	.	.
XLOC_041068	utg7129.3	utg7129|GWHAAAA00021895:20280-21901	CP_TkMS2	1.2928	0	-Inf	NA	0.0001	0.0337176	yes	.	.	.	.	.	.
XLOC_041296	utg7251.27	utg7251|GWHAAAA00004300:125497-127562	CP_TkMS2	6.36378	75.6625	3.57162	5.04791	5e-05	0.0195409	yes	KVH98616.1	hypothetical protein Ccrd_023165 [Cynara cardunculus var. scolymus]	A2Z9A6	UPF0496 protein 4	GO:0016021	integral component of membrane [GO:0016021]
XLOC_041514	-	utg7329|GWHAAAA00008602:52847-53747	CP_TkMS2	2.31633	0	-Inf	NA	5e-05	0.0195409	yes	.	.	.	.	.	.
XLOC_041640	utg7377.8	utg7377|GWHAAAA00005342:42716-49774	CP_TkMS2	120.023	8.56409	-3.80887	-4.67731	5e-05	0.0195409	yes	XP_021976808.1	7-methylguanosine phosphate-specific 5'-nucleotidase A-like isoform X1 [Helianthus annuus]	Q6AYP7	7-methylguanosine phosphate-specific 5'-nucleotidase (7-methylguanosine nucleotidase) (EC 3.1.3.91) (Cytosolic 5'-nucleotidase 3B) (Cytosolic 5'-nucleotidase III-like protein) (cN-III-like protein) (EC 3.1.3.5) (N(7)-methylguanylate 5'-phosphatase)	GO:0000166; GO:0000287; GO:0005737; GO:0008253; GO:0009117	cytoplasm [GO:0005737]; 5'-nucleotidase activity [GO:0008253]; magnesium ion binding [GO:0000287]; nucleotide binding [GO:0000166]; nucleotide metabolic process [GO:0009117]
XLOC_041804	utg7451.6	utg7451|GWHAAAA00010258:45659-46623	CP_TkMS2	2.42746	0	-Inf	NA	5e-05	0.0195409	yes	KVH92197.1	cytochrome P450 [Cynara cardunculus var. scolymus]	Q9FVS9	Alkane hydroxylase MAH1 (EC 1.14.-.-) (Cytochrome P450 96A15) (Protein MID-CHAIN ALKANE HYDROXYLASE 1)	GO:0005506; GO:0005783; GO:0005789; GO:0010025; GO:0016021; GO:0020037; GO:0080133	endoplasmic reticulum [GO:0005783]; endoplasmic reticulum membrane [GO:0005789]; integral component of membrane [GO:0016021]; heme binding [GO:0020037]; iron ion binding [GO:0005506]; midchain alkane hydroxylase activity [GO:0080133]; wax biosynthetic process [GO:0010025]
XLOC_042205	utg7664.14	utg7664|GWHAAAA00025537:46264-51324	CP_TkMS2	26.8703	1.677	-4.00206	-4.78516	5e-05	0.0195409	yes	OTG32760.1	hypothetical protein HannXRQ_Chr03g0090201 [Helianthus annuus]	Q60417	Scavenger receptor class B member 1 (SRB1) (HaSR-BI) (SR-BI)	GO:0001530; GO:0001540; GO:0001875; GO:0001935; GO:0005765; GO:0005887; GO:0005901; GO:0006707; GO:0008035; GO:0009986; GO:0010867; GO:0010886; GO:0010899; GO:0015914; GO:0015920; GO:0030169; GO:0032497; GO:0033344; GO:0034186; GO:0034375; GO:0034383; GO:0034384; GO:0035461; GO:0042632; GO:0043534; GO:0043654; GO:0043691; GO:0044406; GO:0050892; GO:0051000; GO:0070062; GO:0070328; GO:0070506; GO:…	caveola [GO:0005901]; cell surface [GO:0009986]; extracellular exosome [GO:0070062]; integral component of plasma membrane [GO:0005887]; lysosomal membrane [GO:0005765]; amyloid-beta binding [GO:0001540]; apolipoprotein A-I binding [GO:0034186]; high-density lipoprotein particle binding [GO:0008035]; high-density lipoprotein particle receptor activity [GO:0070506]; lipopolysaccharide binding [GO:…
XLOC_042511	utg776.17	utg776|GWHAAAA00000086:70713-95332	CP_TkMS2	53.8543	2.14434	-4.65046	-6.20036	5e-05	0.0195409	yes	KVH95662.1	Fe-S metabolism associated domain, SufE-like protein [Cynara cardunculus var. scolymus]	Q9FXE3	SufE-like protein 2, chloroplastic (Protein SULFUR E 2)	GO:0008047; GO:0009507; GO:0016226; GO:0051176	chloroplast [GO:0009507]; enzyme activator activity [GO:0008047]; iron-sulfur cluster assembly [GO:0016226]; positive regulation of sulfur metabolic process [GO:0051176]
XLOC_042711	utg7863.6	utg7863|GWHAAAA00012466:36096-38285	CP_TkMS2	3.36023	53.6927	3.9981	5.72936	5e-05	0.0195409	yes	XP_021990010.1	ribulose bisphosphate carboxylase/oxygenase activase, chloroplastic-like [Helianthus annuus]	Q40281	Ribulose bisphosphate carboxylase/oxygenase activase, chloroplastic (RA) (RuBisCO activase)	GO:0005524; GO:0009570	chloroplast stroma [GO:0009570]; ATP binding [GO:0005524]
XLOC_043726	utg8285.13	utg8285|GWHAAAA00004525:74379-75990	CP_TkMS2	151.047	2.5552	-5.88542	-8.39889	5e-05	0.0195409	yes	XP_021998847.1	intracellular ribonuclease LX-like [Helianthus annuus]	P80196	Intracellular ribonuclease LX (RNase LX) (EC 3.1.27.1)	GO:0003723; GO:0005737; GO:0033897	cytoplasm [GO:0005737]; ribonuclease T2 activity [GO:0033897]; RNA binding [GO:0003723]
XLOC_044127	-	utg8482|GWHAAAA00020203:7535-8188	CP_TkMS2	0	7.3513	Inf	NA	5e-05	0.0195409	yes	.	.	.	.	.	.
XLOC_044369	utg8604.4	utg8604|GWHAAAA00003192:22667-23467	CP_TkMS2	10.0004	115.001	3.52351	6.30178	5e-05	0.0195409	yes	XP_006303991.1	hypothetical protein CARUB_v10011419mg [Capsella rubella]	Q98HD3	Flagellar L-ring protein (Basal body L-ring protein)	GO:0003774; GO:0009279; GO:0009427; GO:0071973	bacterial-type flagellum basal body, distal rod, L ring [GO:0009427]; cell outer membrane [GO:0009279]; motor activity [GO:0003774]; bacterial-type flagellum-dependent cell motility [GO:0071973]
XLOC_044574	utg8685.4	utg8685|GWHAAAA00007336:14968-16462	CP_TkMS2	5.28919	0	-Inf	NA	5e-05	0.0195409	yes	XP_010558817.1	PREDICTED: zinc finger MYM-type protein 1-like isoform X2 [Tarenaya hassleriana]	O13951	RNA polymerase II nuclear localization protein iwr1	GO:0005634; GO:0005737; GO:0006606; GO:0016591; GO:0044376; GO:1990022	cytoplasm [GO:0005737]; DNA-directed RNA polymerase II, holoenzyme [GO:0016591]; nucleus [GO:0005634]; protein import into nucleus [GO:0006606]; RNA polymerase II complex import to nucleus [GO:0044376]; RNA polymerase III complex localization to nucleus [GO:1990022]
XLOC_044595	utg868.22	utg868|GWHAAAA00003603:112955-115201	CP_TkMS2	133.626	4.62146	-4.8537	-6.49865	5e-05	0.0195409	yes	BAE72092.1	Lactuca sativa 9-cis-epoxycarotenoid dioxygenase 3	Q9LRR7	9-cis-epoxycarotenoid dioxygenase NCED3, chloroplastic (AtNCED3) (EC 1.13.11.51) (Protein SALT TOLERANT 1)	GO:0006970; GO:0009414; GO:0009535; GO:0009570; GO:0009688; GO:0042538; GO:0045549; GO:0046872	chloroplast stroma [GO:0009570]; chloroplast thylakoid membrane [GO:0009535]; 9-cis-epoxycarotenoid dioxygenase activity [GO:0045549]; metal ion binding [GO:0046872]; abscisic acid biosynthetic process [GO:0009688]; hyperosmotic salinity response [GO:0042538]; response to osmotic stress [GO:0006970]; response to water deprivation [GO:0009414]
XLOC_044606	utg8695.8	utg8695|GWHAAAA00006650:58092-69208	CP_TkMS2	9.58028	119.951	3.64623	5.3744	5e-05	0.0195409	yes	XP_021973155.1	aquaporin PIP2-4-like [Helianthus annuus]	Q9FF53	Probable aquaporin PIP2-4 (Plasma membrane intrinsic protein 2.4) (AtPIP2;4) [Cleaved into: Probable aquaporin PIP2-4, N-terminally processed]	GO:0005887; GO:0009506; GO:0009737; GO:0015250; GO:0034220; GO:0048767; GO:0080170	integral component of plasma membrane [GO:0005887]; plasmodesma [GO:0009506]; water channel activity [GO:0015250]; hydrogen peroxide transmembrane transport [GO:0080170]; ion transmembrane transport [GO:0034220]; response to abscisic acid [GO:0009737]; root hair elongation [GO:0048767]
XLOC_044606	utg8695.9	utg8695|GWHAAAA00006650:58092-69208	CP_TkMS2	9.58028	119.951	3.64623	5.3744	5e-05	0.0195409	yes	XP_021973155.1	aquaporin PIP2-4-like [Helianthus annuus]	Q9FF53	Probable aquaporin PIP2-4 (Plasma membrane intrinsic protein 2.4) (AtPIP2;4) [Cleaved into: Probable aquaporin PIP2-4, N-terminally processed]	GO:0005887; GO:0009506; GO:0009737; GO:0015250; GO:0034220; GO:0048767; GO:0080170	integral component of plasma membrane [GO:0005887]; plasmodesma [GO:0009506]; water channel activity [GO:0015250]; hydrogen peroxide transmembrane transport [GO:0080170]; ion transmembrane transport [GO:0034220]; response to abscisic acid [GO:0009737]; root hair elongation [GO:0048767]
XLOC_044708	utg8748.6	utg8748|GWHAAAA00012965:20989-23368	CP_TkMS2	19.6949	269.535	3.77458	4.52698	5e-05	0.0195409	yes	KVI02715.1	Homeodomain-like protein [Cynara cardunculus var. scolymus]	Q9FDW1	Transcription factor MYB44 (Myb-related protein 44) (AtMYB44) (Myb-related protein R1) (AtMYBR1)	GO:0000981; GO:0001135; GO:0003700; GO:0005634; GO:0006351; GO:0006355; GO:0006357; GO:0009414; GO:0009651; GO:0009723; GO:0009733; GO:0009737; GO:0009738; GO:0009739; GO:0009751; GO:0009753; GO:0010200; GO:0010929; GO:0030154; GO:0042742; GO:0043565; GO:0044212; GO:0046686; GO:0050832; GO:2000022; GO:2000031	nucleus [GO:0005634]; DNA binding transcription factor activity [GO:0003700]; RNA polymerase II transcription factor activity, sequence-specific DNA binding [GO:0000981]; sequence-specific DNA binding [GO:0043565]; transcription factor activity, RNA polymerase II transcription factor recruiting [GO:0001135]; transcription regulatory region DNA binding [GO:0044212]; abscisic acid-activated signali…
XLOC_044777	utg8777.27	utg8777|GWHAAAA00020722:176348-178493	CP_TkMS2	33.2098	1.12307	-4.88609	-5.44933	0.00015	0.0452526	yes	AQY55798.1	chalcone synthase [Ixeris dentata var. albiflora]	P48392	Chalcone synthase 3 (EC 2.3.1.74) (Naringenin-chalcone synthase 3)	GO:0009813; GO:0016210	naringenin-chalcone synthase activity [GO:0016210]; flavonoid biosynthetic process [GO:0009813]
XLOC_045059	-	utg8911|GWHAAAA00002765:43520-43726	CP_TkMS2	49.3041	0	-Inf	NA	5e-05	0.0195409	yes	.	.	.	.	.	.
XLOC_045159	utg894.6	utg894|GWHAAAA00001979:48892-52312	CP_TkMS2	150.934	15.0441	-3.32666	-5.92849	0.0001	0.0337176	yes	KVI12160.1	hypothetical protein Ccrd_009421 [Cynara cardunculus var. scolymus]	P53521	Putative minor fimbrial subunit PmfF	GO:0007155; GO:0009289	pilus [GO:0009289]; cell adhesion [GO:0007155]
XLOC_045275	utg899.10	utg899|GWHAAAA00001627:59146-60331	CP_TkMS2	75.1188	1.51412	-5.63262	-7.85063	5e-05	0.0195409	yes	KVI12113.1	Ctr copper transporter [Cynara cardunculus var. scolymus]	Q8GWP3	Copper transporter 6 (AtCOPT6)	GO:0005375; GO:0005773; GO:0016021	integral component of membrane [GO:0016021]; vacuole [GO:0005773]; copper ion transmembrane transporter activity [GO:0005375]
XLOC_045527	utg9089.12	utg9089|GWHAAAA00000814:68174-70904	CP_TkMS2	0	1.30751	Inf	NA	5e-05	0.0195409	yes	XP_022013000.1	subtilisin-like protease SBT1.2 [Helianthus annuus]	O64495	Subtilisin-like protease SBT1.2 (EC 3.4.21.-) (Cucumisin-like serine protease SDD1) (Protein STOMATAL DENSITY AND DISTRIBUTION 1) (Subtilase subfamily 1 member 2) (AtSBT1.2) (Subtilisin-like protease SDD1)	GO:0004252; GO:0009897; GO:0010103; GO:0042127; GO:0048046	apoplast [GO:0048046]; external side of plasma membrane [GO:0009897]; serine-type endopeptidase activity [GO:0004252]; regulation of cell proliferation [GO:0042127]; stomatal complex morphogenesis [GO:0010103]
XLOC_045788	utg9220.3	utg9220|GWHAAAA00002264:6273-10743	CP_TkMS2	104.033	7.20778	-3.85135	-5.18229	0.00015	0.0452526	yes	KVH88731.1	CheY-like superfamily, partial [Cynara cardunculus var. scolymus]	B8B3I4	Two-component response regulator ORR22	GO:0000160; GO:0003700; GO:0005634; GO:0006351; GO:0009736; GO:0043565; GO:0045893	nucleus [GO:0005634]; DNA binding transcription factor activity [GO:0003700]; sequence-specific DNA binding [GO:0043565]; cytokinin-activated signaling pathway [GO:0009736]; phosphorelay signal transduction system [GO:0000160]; positive regulation of transcription, DNA-templated [GO:0045893]; transcription, DNA-templated [GO:0006351]
XLOC_045962	utg9281.1	utg9281|GWHAAAA00007773:5576-6268	CP_TkMS2	3.27676	0	-Inf	NA	5e-05	0.0195409	yes	XP_006467611.1	PREDICTED: uncharacterized protein LOC102627023 [Citrus sinensis]	Q52K95	Precursor of CEP14 (PCEP14) [Cleaved into: C-terminally encoded peptide 14 (CEP14)]	GO:0005179; GO:0006970; GO:0007275; GO:0010037; GO:0048046; GO:1902025; GO:2000280	apoplast [GO:0048046]; hormone activity [GO:0005179]; multicellular organism development [GO:0007275]; nitrate import [GO:1902025]; regulation of root development [GO:2000280]; response to carbon dioxide [GO:0010037]; response to osmotic stress [GO:0006970]
XLOC_046303	utg9462.10	utg9462|GWHAAAA00005672:64276-70520	CP_TkMS2	12.9717	1.23507	-3.3927	-4.22093	0.0001	0.0337176	yes	KVH94353.1	hypothetical protein Ccrd_003586 [Cynara cardunculus var. scolymus]	Q9LY77	Calcium-transporting ATPase 12, plasma membrane-type (EC 3.6.3.8) (Ca(2+)-ATPase isoform 12)	GO:0005388; GO:0005516; GO:0005524; GO:0005887; GO:0043231; GO:0046872	integral component of plasma membrane [GO:0005887]; intracellular membrane-bounded organelle [GO:0043231]; ATP binding [GO:0005524]; calcium-transporting ATPase activity [GO:0005388]; calmodulin binding [GO:0005516]; metal ion binding [GO:0046872]
XLOC_046405	utg9510.3	utg9510|GWHAAAA00012236:22860-25419	CP_TkMS2	73.8481	6.01938	-3.61687	-4.53884	5e-05	0.0195409	yes	XP_021969630.1	vicilin-like seed storage protein At2g18540 [Helianthus annuus]	F4IQK5	Vicilin-like seed storage protein At2g18540 (Globulin At2g18540)	GO:0045735	nutrient reservoir activity [GO:0045735]
XLOC_046501	-	utg9562|GWHAAAA00017865:18280-19672	CP_TkMS2	0	1.60435	Inf	NA	5e-05	0.0195409	yes	.	.	.	.	.	.
XLOC_046617	utg9644.1	utg9644|GWHAAAA00022947:3781-5230	CP_TkMS2	86.2413	7.95751	-3.43799	-5.62159	0.0001	0.0337176	yes	KVI04908.1	Barwin-like endoglucanase [Cynara cardunculus var. scolymus]	O80932	Expansin-A3 (AtEXPA3) (Alpha-expansin-3) (At-EXP3) (AtEx3) (Ath-ExpAlpha-1.9)	GO:0005576; GO:0005618; GO:0006949; GO:0009664; GO:0009739; GO:0010114; GO:0016020	cell wall [GO:0005618]; extracellular region [GO:0005576]; membrane [GO:0016020]; plant-type cell wall organization [GO:0009664]; response to gibberellin [GO:0009739]; response to red light [GO:0010114]; syncytium formation [GO:0006949]
XLOC_046732	utg9721.11	utg9721|GWHAAAA00008391:59625-60471	CP_TkMS2	153.829	5.31129	-4.85612	-8.0969	5e-05	0.0195409	yes	.	.	B4SBV2	50S ribosomal protein L22	GO:0003735; GO:0006412; GO:0015934; GO:0019843	large ribosomal subunit [GO:0015934]; rRNA binding [GO:0019843]; structural constituent of ribosome [GO:0003735]; translation [GO:0006412]
XLOC_000294	utg10132.4	utg10132|GWHAAAA00001868:18248-19984	CP_TkMS3	1.48641	0	-Inf	NA	5e-05	0.0188382	yes	CCA94610.1	polyphenol oxidase precursor (chloroplast) (chloroplast) [Taraxacum officinale]	Q9ZP19	Polyphenol oxidase I, chloroplastic (PPO-I) (EC 1.10.3.1) (Catechol oxidase I)	GO:0004097; GO:0005507; GO:0009543	chloroplast thylakoid lumen [GO:0009543]; catechol oxidase activity [GO:0004097]; copper ion binding [GO:0005507]
XLOC_000299	utg10133.9	utg10133|GWHAAAA00011355:41651-45056	CP_TkMS3	27.0586	149.09	2.46203	4.1691	0.0002	0.0493118	yes	XP_022037614.1	putative glycine-rich cell wall structural protein 1 [Helianthus annuus]	.	.	.	.
XLOC_000416	utg10199.9	utg10199|GWHAAAA00007121:47917-54512	CP_TkMS3	1.90117	0	-Inf	NA	0.00015	0.0422672	yes	KVI09742.1	AP2/ERF domain-containing protein [Cynara cardunculus var. scolymus]	P47927	Floral homeotic protein APETALA 2	GO:0003677; GO:0003700; GO:0005634; GO:0006351; GO:0009908; GO:0010073; GO:0010093; GO:0030154; GO:0048316; GO:0048481	nucleus [GO:0005634]; DNA binding [GO:0003677]; DNA binding transcription factor activity [GO:0003700]; cell differentiation [GO:0030154]; flower development [GO:0009908]; meristem maintenance [GO:0010073]; plant ovule development [GO:0048481]; seed development [GO:0048316]; specification of floral organ identity [GO:0010093]; transcription, DNA-templated [GO:0006351]
XLOC_000762	-	utg10370|GWHAAAA00006070:20037-20888	CP_TkMS3	0	8.02888	Inf	NA	5e-05	0.0188382	yes	.	.	.	.	.	.
XLOC_000977	utg10479.8	utg10479|GWHAAAA00008679:52657-60308	CP_TkMS3	6.22659	88.3305	3.8264	5.39825	5e-05	0.0188382	yes	XP_022017115.1	GDSL esterase/lipase At1g29660-like [Helianthus annuus]	Q9C7N5	GDSL esterase/lipase At1g29660 (EC 3.1.1.-) (Apoplastic EDS1-dependent protein 3) (Extracellular lipase At1g29660)	GO:0005634; GO:0009627; GO:0016042; GO:0016788; GO:0048046	apoplast [GO:0048046]; nucleus [GO:0005634]; hydrolase activity, acting on ester bonds [GO:0016788]; lipid catabolic process [GO:0016042]; systemic acquired resistance [GO:0009627]
XLOC_001730	utg10865.4	utg10865|GWHAAAA00022158:18393-22484	CP_TkMS3	0	0.463529	Inf	NA	5e-05	0.0188382	yes	XP_021971076.1	uncharacterized protein LOC110866029 [Helianthus annuus]	P0C2F6	Putative ribonuclease H protein At1g65750 (EC 3.1.26.4)	GO:0003676; GO:0004523; GO:0046872	metal ion binding [GO:0046872]; nucleic acid binding [GO:0003676]; RNA-DNA hybrid ribonuclease activity [GO:0004523]
XLOC_002074	utg11070.21	utg11070|GWHAAAA00009092:119328-123876	CP_TkMS3	5.68081	52.4691	3.2073	4.95966	5e-05	0.0188382	yes	OAY81871.1	Auxin response factor 16 [Ananas comosus]	Q8RYC8	Auxin response factor 19 (Auxin-responsive protein IAA22)	GO:0003677; GO:0003700; GO:0005634; GO:0006351; GO:0009723; GO:0009733; GO:0009734; GO:0010311; GO:0043565; GO:0046983; GO:0048366; GO:0048527	nucleus [GO:0005634]; DNA binding [GO:0003677]; DNA binding transcription factor activity [GO:0003700]; protein dimerization activity [GO:0046983]; sequence-specific DNA binding [GO:0043565]; auxin-activated signaling pathway [GO:0009734]; lateral root development [GO:0048527]; lateral root formation [GO:0010311]; leaf development [GO:0048366]; response to auxin [GO:0009733]; response to ethylene…
XLOC_002432	-	utg11272|GWHAAAA00009611:63021-69881	CP_TkMS3	7.87027	49.6713	2.65793	3.67182	0.0002	0.0493118	yes	.	.	.	.	.	.
XLOC_002697	utg11403.13	utg11403|GWHAAAA00007417:56078-57084	CP_TkMS3	2.02879	75.7893	5.22331	9.09116	5e-05	0.0188382	yes	KVI01950.1	AP2/ERF domain-containing protein [Cynara cardunculus var. scolymus]	Q9SZ06	Ethylene-responsive transcription factor ERF109	GO:0003677; GO:0003700; GO:0005634; GO:0006351; GO:0009873; GO:0010087; GO:0010200; GO:0050832; GO:0051301	nucleus [GO:0005634]; DNA binding [GO:0003677]; DNA binding transcription factor activity [GO:0003700]; cell division [GO:0051301]; defense response to fungus [GO:0050832]; ethylene-activated signaling pathway [GO:0009873]; phloem or xylem histogenesis [GO:0010087]; response to chitin [GO:0010200]; transcription, DNA-templated [GO:0006351]
XLOC_002923	utg11535.4	utg11535|GWHAAAA00028822:15481-19748	CP_TkMS3	10.5764	95.0838	3.16835	4.7046	5e-05	0.0188382	yes	XP_021990035.1	phospholipase D alpha 4 [Helianthus annuus]	Q9C888	Phospholipase D alpha 4 (AtPLDalpha4) (PLD alpha 4) (EC 3.1.4.4) (PLDalpha3) (Phospholipase D epsilon) (AtPLDepsilon) (PLD epsilon)	GO:0004630; GO:0005509; GO:0005886; GO:0006970; GO:0006995; GO:0009395; GO:0009791; GO:0016036; GO:0016049; GO:0045848; GO:0046470; GO:0048364; GO:0051301; GO:0051365; GO:0070290	plasma membrane [GO:0005886]; calcium ion binding [GO:0005509]; N-acylphosphatidylethanolamine-specific phospholipase D activity [GO:0070290]; phospholipase D activity [GO:0004630]; cell division [GO:0051301]; cell growth [GO:0016049]; cellular response to nitrogen starvation [GO:0006995]; cellular response to phosphate starvation [GO:0016036]; cellular response to potassium ion starvation [GO:00…
XLOC_002992	utg11572.3	utg11572|GWHAAAA00016072:9651-11343	CP_TkMS3	6.67507	73.2762	3.45649	6.42595	5e-05	0.0188382	yes	KVI08690.1	AMP-binding, conserved site-containing protein [Cynara cardunculus var. scolymus]	Q9FFE6	Probable acyl-activating enzyme 5, peroxisomal (EC 6.2.1.-) (AMP-binding protein 5) (AtAMPBP5)	GO:0005777; GO:0006631; GO:0016874	peroxisome [GO:0005777]; ligase activity [GO:0016874]; fatty acid metabolic process [GO:0006631]
XLOC_003038	utg11605.16	utg11605|GWHAAAA00030563:47770-49586	CP_TkMS3	6.54861	61.5926	3.2335	6.00122	5e-05	0.0188382	yes	AAL77102.1	carbohydrate oxidase [Lactuca sativa]	Q9SA85	Berberine bridge enzyme-like 8 (AtBBE-like 8) (EC 1.1.1.-)	GO:0005576; GO:0005618; GO:0016614; GO:0050660	cell wall [GO:0005618]; extracellular region [GO:0005576]; flavin adenine dinucleotide binding [GO:0050660]; oxidoreductase activity, acting on CH-OH group of donors [GO:0016614]
XLOC_003563	utg11846.1	utg11846|GWHAAAA00017733:3231-4959	CP_TkMS3	219.435	33.7304	-2.70167	-4.77936	0.00015	0.0422672	yes	XP_022022048.1	senescence-specific cysteine protease SAG39-like [Helianthus annuus]	A2XQE8	Senescence-specific cysteine protease SAG39 (EC 3.4.22.-) (Cysteine proteinase SAG39) (Protein SENESCENCE-ASSOCIATED GENE 39)	GO:0007568; GO:0008234; GO:0009723; GO:0009737; GO:0009739; GO:0010150; GO:0010282; GO:0010623	senescence-associated vacuole [GO:0010282]; cysteine-type peptidase activity [GO:0008234]; aging [GO:0007568]; leaf senescence [GO:0010150]; programmed cell death involved in cell development [GO:0010623]; response to abscisic acid [GO:0009737]; response to ethylene [GO:0009723]; response to gibberellin [GO:0009739]
XLOC_003768	utg11964.6	utg11964|GWHAAAA00001581:34475-38111	CP_TkMS3	4.19999	40.909	3.28396	5.94386	5e-05	0.0188382	yes	KVI05430.1	hypothetical protein Ccrd_016223 [Cynara cardunculus var. scolymus]	O49298	Probable pectinesterase/pectinesterase inhibitor 6 [Includes: Pectinesterase inhibitor 6 (Pectin methylesterase inhibitor 6); Pectinesterase 6 (PE 6) (EC 3.1.1.11) (Pectin methylesterase 6) (AtPME6)]	GO:0005576; GO:0005618; GO:0030599; GO:0042545; GO:0045330; GO:0045490; GO:0046910; GO:0071944	cell periphery [GO:0071944]; cell wall [GO:0005618]; extracellular region [GO:0005576]; aspartyl esterase activity [GO:0045330]; pectinesterase activity [GO:0030599]; pectinesterase inhibitor activity [GO:0046910]; cell wall modification [GO:0042545]; pectin catabolic process [GO:0045490]
XLOC_004276	utg12286.22	utg12286|GWHAAAA00011103:104316-108362	CP_TkMS3	4.83652	39.2643	3.02118	5.4908	5e-05	0.0188382	yes	KVH91152.1	Glycoside hydrolase, catalytic domain-containing protein [Cynara cardunculus var. scolymus]	Q8GU20	Strictosidine-O-beta-D-glucosidase (EC 3.2.1.105)	GO:0005975; GO:0009821; GO:0050422	strictosidine beta-glucosidase activity [GO:0050422]; alkaloid biosynthetic process [GO:0009821]; carbohydrate metabolic process [GO:0005975]
XLOC_004384	utg12341.3	utg12341|GWHAAAA00027422:7339-8209	CP_TkMS3	80.8815	11.6538	-2.79501	-4.24454	5e-05	0.0188382	yes	XP_022033787.1	uncharacterized protein LOC110935746 isoform X2 [Helianthus annuus]	Q5GSS5	Alanine--tRNA ligase (EC 6.1.1.7) (Alanyl-tRNA synthetase) (AlaRS)	GO:0000049; GO:0004813; GO:0005524; GO:0005737; GO:0006419; GO:0046872	cytoplasm [GO:0005737]; alanine-tRNA ligase activity [GO:0004813]; ATP binding [GO:0005524]; metal ion binding [GO:0046872]; tRNA binding [GO:0000049]; alanyl-tRNA aminoacylation [GO:0006419]
XLOC_005665	utg13079.16	utg13079|GWHAAAA00010131:70746-74271	CP_TkMS3	0	2.70503	Inf	NA	5e-05	0.0188382	yes	XP_022028017.1	vacuolar-sorting receptor 3-like [Helianthus annuus]	Q56ZQ3	Vacuolar-sorting receptor 4 (AtVSR4) (BP80-like protein a) (AtBP80a) (Epidermal growth factor receptor-like protein 2b) (AtELP2b)	GO:0000139; GO:0005509; GO:0005768; GO:0005773; GO:0005794; GO:0005802; GO:0006623; GO:0016021; GO:0030665; GO:0031902	clathrin-coated vesicle membrane [GO:0030665]; endosome [GO:0005768]; Golgi apparatus [GO:0005794]; Golgi membrane [GO:0000139]; integral component of membrane [GO:0016021]; late endosome membrane [GO:0031902]; trans-Golgi network [GO:0005802]; vacuole [GO:0005773]; calcium ion binding [GO:0005509]; protein targeting to vacuole [GO:0006623]
XLOC_006185	utg13372.7	utg13372|GWHAAAA00020299:32827-33674	CP_TkMS3	46.3182	7.74954	-2.5794	-5.53592	0.0002	0.0493118	yes	KVI03968.1	Glutaredoxin [Cynara cardunculus var. scolymus]	O82255	Glutaredoxin-C13 (AtGrxC13) (Protein ROXY 9)	GO:0005634; GO:0005737; GO:0006995; GO:0009055; GO:0015035; GO:0045454	cytoplasm [GO:0005737]; nucleus [GO:0005634]; electron transfer activity [GO:0009055]; protein disulfide oxidoreductase activity [GO:0015035]; cell redox homeostasis [GO:0045454]; cellular response to nitrogen starvation [GO:0006995]
XLOC_006497	utg13555.3	utg13555|GWHAAAA00009298:11164-17869	CP_TkMS3	10.2034	110.106	3.43177	4.98962	5e-05	0.0188382	yes	XP_021984828.1	kinesin-like protein KIN-5B [Helianthus annuus]	Q0WQJ7	Kinesin-like protein KIN-5B (AtKRP125a)	GO:0005524; GO:0005737; GO:0005819; GO:0005871; GO:0005874; GO:0007018; GO:0008017; GO:0008574	cytoplasm [GO:0005737]; kinesin complex [GO:0005871]; microtubule [GO:0005874]; spindle [GO:0005819]; ATP binding [GO:0005524]; ATP-dependent microtubule motor activity, plus-end-directed [GO:0008574]; microtubule binding [GO:0008017]; microtubule-based movement [GO:0007018]
XLOC_006931	-	utg137|GWHAAAA00003662:32405-33873	CP_TkMS3	10.6618	112.321	3.39711	4.89021	5e-05	0.0188382	yes	.	.	.	.	.	.
XLOC_007064	utg13907.7	utg13907|GWHAAAA00005751:25727-28153	CP_TkMS3	4.5339	24.2108	2.41683	4.40704	0.0002	0.0493118	yes	KVI04848.1	Ankyrin repeat-containing protein [Cynara cardunculus var. scolymus]	Q9XEE6	Zinc finger CCCH domain-containing protein 29 (AtC3H29) (AtSZF2)	GO:0003677; GO:0003700; GO:0005634; GO:0006355; GO:0009409; GO:0010200; GO:0046872; GO:0050832	nucleus [GO:0005634]; DNA binding [GO:0003677]; DNA binding transcription factor activity [GO:0003700]; metal ion binding [GO:0046872]; defense response to fungus [GO:0050832]; regulation of transcription, DNA-templated [GO:0006355]; response to chitin [GO:0010200]; response to cold [GO:0009409]
XLOC_007373	utg14059.9	utg14059|GWHAAAA00025243:30578-32725	CP_TkMS3	7.31353	62.6873	3.09953	4.947	0.0001	0.0322423	yes	XP_022039226.1	NAC transcription factor 56-like [Helianthus annuus]	Q9LD44	NAC transcription factor 56 (AtNAC056) (NAC domain-containing protein 2) (AtNAC2) (Protein NAC-REGULATED SEED MORPHOLOGY 1)	GO:0003700; GO:0005634; GO:0006351; GO:0009753; GO:0044212; GO:0045995; GO:0048317; GO:0080060	nucleus [GO:0005634]; DNA binding transcription factor activity [GO:0003700]; transcription regulatory region DNA binding [GO:0044212]; integument development [GO:0080060]; regulation of embryonic development [GO:0045995]; response to jasmonic acid [GO:0009753]; seed morphogenesis [GO:0048317]; transcription, DNA-templated [GO:0006351]
XLOC_009364	utg15305.3	utg15305|GWHAAAA00005617:14134-15896	CP_TkMS3	8.51827	57.5668	2.75661	4.33752	5e-05	0.0188382	yes	KVH94246.1	Concanavalin A-like lectin/glucanase superfamily [Cynara cardunculus var. scolymus]	Q9LJR7	Xyloglucan endotransglucosylase/hydrolase protein 3 (At-XTH3) (XTH-3) (EC 2.4.1.207)	GO:0004553; GO:0005618; GO:0009832; GO:0010411; GO:0016762; GO:0030243; GO:0048046; GO:0048573; GO:0071555	apoplast [GO:0048046]; cell wall [GO:0005618]; hydrolase activity, hydrolyzing O-glycosyl compounds [GO:0004553]; xyloglucan:xyloglucosyl transferase activity [GO:0016762]; cell wall organization [GO:0071555]; cellulose metabolic process [GO:0030243]; photoperiodism, flowering [GO:0048573]; plant-type cell wall biogenesis [GO:0009832]; xyloglucan metabolic process [GO:0010411]
XLOC_010770	utg16184.8	utg16184|GWHAAAA00027909:23620-27613	CP_TkMS3	20.6157	147.907	2.84287	4.4308	5e-05	0.0188382	yes	KVH96768.1	Aspartic peptidase [Cynara cardunculus var. scolymus]	O65390	Aspartic proteinase A1 (EC 3.4.23.-)	GO:0004175; GO:0004190; GO:0005773; GO:0005829; GO:0006508; GO:0006629; GO:0009506; GO:0009651; GO:0009735; GO:0030163	cytosol [GO:0005829]; plasmodesma [GO:0009506]; vacuole [GO:0005773]; aspartic-type endopeptidase activity [GO:0004190]; endopeptidase activity [GO:0004175]; lipid metabolic process [GO:0006629]; protein catabolic process [GO:0030163]; proteolysis [GO:0006508]; response to cytokinin [GO:0009735]; response to salt stress [GO:0009651]
XLOC_010951	utg16278.2	utg16278|GWHAAAA00021459:30334-32395	CP_TkMS3	33.7789	211.165	2.64418	4.96505	0.0002	0.0493118	yes	XP_021978436.1	transcription factor MYB108-like [Helianthus annuus]	Q9FGY3	Transcription factor MYB78 (Myb-related protein 78) (AtMYB78)	GO:0003700; GO:0005634; GO:0006351; GO:0009651; GO:0009737; GO:0043565; GO:1902074	nucleus [GO:0005634]; DNA binding transcription factor activity [GO:0003700]; sequence-specific DNA binding [GO:0043565]; response to abscisic acid [GO:0009737]; response to salt [GO:1902074]; response to salt stress [GO:0009651]; transcription, DNA-templated [GO:0006351]
XLOC_011566	utg16679.15	utg16679|GWHAAAA00026749:46116-55757	CP_TkMS3	1.22142	8.0823	2.72621	4.28665	0.00015	0.0422672	yes	WP_053586301.1	phosphoenolpyruvate carboxykinase (GTP) [Actinomyces sp. oral taxon 414]	P57110	A disintegrin and metalloproteinase with thrombospondin motifs 8 (ADAM-TS 8) (ADAM-TS8) (ADAMTS-8) (EC 3.4.24.-) (METH-2)	GO:0004222; GO:0005578; GO:0008201; GO:0008270	proteinaceous extracellular matrix [GO:0005578]; heparin binding [GO:0008201]; metalloendopeptidase activity [GO:0004222]; zinc ion binding [GO:0008270]
XLOC_011596	utg16707.5	utg16707|GWHAAAA00024831:11055-11935	CP_TkMS3	0	1.75764	Inf	NA	0.0001	0.0322423	yes	KVI10977.1	protein of unknown function DUF125, transmembrane [Cynara cardunculus var. scolymus]	Q9M2C0	Vacuolar iron transporter homolog 4 (Protein NODULIN-LIKE 4)	GO:0005381; GO:0005384; GO:0005774; GO:0006880; GO:0016020; GO:0016021; GO:0030026; GO:0071281; GO:0071421	integral component of membrane [GO:0016021]; membrane [GO:0016020]; vacuolar membrane [GO:0005774]; iron ion transmembrane transporter activity [GO:0005381]; manganese ion transmembrane transporter activity [GO:0005384]; cellular manganese ion homeostasis [GO:0030026]; cellular response to iron ion [GO:0071281]; intracellular sequestering of iron ion [GO:0006880]; manganese ion transmembrane tran…
XLOC_012628	-	utg17469|GWHAAAA00026435:21902-22905	CP_TkMS3	15.4135	111.455	2.8542	6.14936	5e-05	0.0188382	yes	.	.	.	.	.	.
XLOC_013240	utg17860.5	utg17860|GWHAAAA00002720:24471-25139	CP_TkMS3	14.7438	131.424	3.15605	7.81401	5e-05	0.0188382	yes	.	.	B2SFQ6	Proline--tRNA ligase (EC 6.1.1.15) (Prolyl-tRNA synthetase) (ProRS)	GO:0002161; GO:0004827; GO:0005524; GO:0005737; GO:0006433	cytoplasm [GO:0005737]; aminoacyl-tRNA editing activity [GO:0002161]; ATP binding [GO:0005524]; proline-tRNA ligase activity [GO:0004827]; prolyl-tRNA aminoacylation [GO:0006433]
XLOC_013811	utg1827.12	utg1827|GWHAAAA00008521:80272-82207	CP_TkMS3	0	0.676544	Inf	NA	0.0002	0.0493118	yes	KVH91652.1	Pentatricopeptide repeat-containing protein [Cynara cardunculus var. scolymus]	Q9C6T2	Pentatricopeptide repeat-containing protein At1g31920	GO:0003723; GO:0004519; GO:0008270; GO:0009451; GO:0043231	intracellular membrane-bounded organelle [GO:0043231]; endonuclease activity [GO:0004519]; RNA binding [GO:0003723]; zinc ion binding [GO:0008270]; RNA modification [GO:0009451]
XLOC_013980	utg18401.1	utg18401|GWHAAAA00027681:1044-2995	CP_TkMS3	6.29921	63.9542	3.3438	5.14495	5e-05	0.0188382	yes	P22357.1	RecName: Full=Anther-specific protein SF18; AltName: Full=Defensin-like protein; Flags: Precursor	P22357	Anther-specific protein SF18 (Defensin-like protein) (Fragment)	GO:0005576; GO:0005618; GO:0006952; GO:0071555	cell wall [GO:0005618]; extracellular region [GO:0005576]; cell wall organization [GO:0071555]; defense response [GO:0006952]
XLOC_014175	utg18540.1	utg18540|GWHAAAA00009177:26591-30270	CP_TkMS3	1.43376	14.2677	3.31488	5.42519	0.0001	0.0322423	yes	AQK71524.1	Beta-fructofuranosidase, cell wall isozyme [Zea mays]	Q9FPR3	Serine/threonine-protein kinase EDR1 (EC 2.7.11.1) (MAPKK kinase EDR1) (Protein ENHANCED DISEASE RESISTANCE 1) (AtEDR1) (Serine/threonine/tyrosine-protein kinase 10)	GO:0000165; GO:0002229; GO:0004709; GO:0004712; GO:0005524; GO:0005634; GO:0005768; GO:0005769; GO:0005783; GO:0005802; GO:0005829; GO:0005886; GO:0008219; GO:0009414; GO:0009617; GO:0009620; GO:0009723; GO:0009738; GO:0009788; GO:0009873; GO:0012510; GO:0016301; GO:0046777; GO:1900150; GO:1900424; GO:2000031	cytosol [GO:0005829]; early endosome [GO:0005769]; endoplasmic reticulum [GO:0005783]; endosome [GO:0005768]; nucleus [GO:0005634]; plasma membrane [GO:0005886]; trans-Golgi network [GO:0005802]; trans-Golgi network transport vesicle membrane [GO:0012510]; ATP binding [GO:0005524]; kinase activity [GO:0016301]; MAP kinase kinase kinase activity [GO:0004709]; protein serine/threonine/tyrosine kina…
XLOC_014196	utg18553.2	utg18553|GWHAAAA00008414:17595-18971	CP_TkMS3	17.066	110.419	2.69379	5.39054	5e-05	0.0188382	yes	KVH97874.1	Pollen Ole e 1 allergen/extensin [Cynara cardunculus var. scolymus]	Q6NMJ2	Pollen-specific protein-like At4g18596	GO:0005615	extracellular space [GO:0005615]
XLOC_014358	utg18685.3	utg18685|GWHAAAA00000303:11897-16041	CP_TkMS3	0.855079	8.75111	3.35534	4.5043	0.0001	0.0322423	yes	KVI11909.1	hypothetical protein Ccrd_009652 [Cynara cardunculus var. scolymus]	P32898	Mitochondrial presequence protease (EC 3.4.24.-) (Cytosolic metalloprotease 1) (Metalloprotease of 112 kDa)	GO:0004222; GO:0005739; GO:0005758; GO:0006508; GO:0046872; GO:0051603	mitochondrial intermembrane space [GO:0005758]; mitochondrion [GO:0005739]; metal ion binding [GO:0046872]; metalloendopeptidase activity [GO:0004222]; proteolysis [GO:0006508]; proteolysis involved in cellular protein catabolic process [GO:0051603]
XLOC_014603	utg1886.3	utg1886|GWHAAAA00004579:43482-44593	CP_TkMS3	0	1.3542	Inf	NA	0.0002	0.0493118	yes	KVH91041.1	Glycoside hydrolase, catalytic domain-containing protein [Cynara cardunculus var. scolymus]	Q9LIR6	Beta-amylase 1, chloroplastic (EC 3.2.1.2) (1,4-alpha-D-glucan maltohydrolase) (Beta-amylase 7) (Thioredoxin-regulated beta-amylase) (TR-BAMY)	GO:0005634; GO:0005829; GO:0005983; GO:0009414; GO:0009507; GO:0016161; GO:0102229	chloroplast [GO:0009507]; cytosol [GO:0005829]; nucleus [GO:0005634]; amylopectin maltohydrolase activity [GO:0102229]; beta-amylase activity [GO:0016161]; response to water deprivation [GO:0009414]; starch catabolic process [GO:0005983]
XLOC_015174	utg19252.6	utg19252|GWHAAAA00004547:17478-19119	CP_TkMS3	10.0852	70.1147	2.79748	5.66818	5e-05	0.0188382	yes	KVI08995.1	Basic helix-loop-helix leucine zipper transcription factor [Cynara cardunculus var. scolymus]	Q9FUA4	Transcription factor SPATULA (Basic helix-loop-helix protein 24) (AtbHLH24) (bHLH 24) (Transcription factor EN 99) (bHLH transcription factor bHLH024)	GO:0003677; GO:0003700; GO:0005634; GO:0006351; GO:0007623; GO:0009409; GO:0010114; GO:0010154; GO:0010187; GO:0046983; GO:0048440	nucleus [GO:0005634]; DNA binding [GO:0003677]; DNA binding transcription factor activity [GO:0003700]; protein dimerization activity [GO:0046983]; carpel development [GO:0048440]; circadian rhythm [GO:0007623]; fruit development [GO:0010154]; negative regulation of seed germination [GO:0010187]; response to cold [GO:0009409]; response to red light [GO:0010114]; transcription, DNA-templated [GO:0…
XLOC_015229	utg1926.7	utg1926|GWHAAAA00021268:31440-33569	CP_TkMS3	10.5698	114.024	3.43131	6.05207	5e-05	0.0188382	yes	XP_021976441.1	berberine bridge enzyme-like 21 [Helianthus annuus]	Q9SVG3	Berberine bridge enzyme-like 21 (AtBBE-like 21) (EC 1.1.1.-)	GO:0005618; GO:0005886; GO:0016614; GO:0048046; GO:0050660	apoplast [GO:0048046]; cell wall [GO:0005618]; plasma membrane [GO:0005886]; flavin adenine dinucleotide binding [GO:0050660]; oxidoreductase activity, acting on CH-OH group of donors [GO:0016614]
XLOC_015692	utg19621.4	utg19621|GWHAAAA00001743:24292-25193	CP_TkMS3	0	1.78852	Inf	NA	0.0002	0.0493118	yes	AHI59150.1	DREB1A [Cichorium intybus]	Q9FJ93	Dehydration-responsive element-binding protein 1D (Protein DREB1D) (C-repeat/dehydration-responsive element-binding factor 4) (C-repeat-binding factor 4) (CRT/DRE-binding factor 4)	GO:0003700; GO:0005634; GO:0006351; GO:0009738; GO:0019760; GO:0043565	nucleus [GO:0005634]; DNA binding transcription factor activity [GO:0003700]; sequence-specific DNA binding [GO:0043565]; abscisic acid-activated signaling pathway [GO:0009738]; glucosinolate metabolic process [GO:0019760]; transcription, DNA-templated [GO:0006351]
XLOC_016022	utg1988.5	utg1988|GWHAAAA00016862:21642-23097	CP_TkMS3	0	0.689138	Inf	NA	0.0001	0.0322423	yes	WP_052055527.1	CHAT domain-containing protein, partial [Myxosarcina sp. GI1]	Q6PDK2	Histone-lysine N-methyltransferase 2D (Lysine N-methyltransferase 2D) (EC 2.1.1.43) (ALL1-related protein) (Myeloid/lymphoid or mixed-lineage leukemia protein 2)	GO:0001555; GO:0001701; GO:0005654; GO:0006342; GO:0006351; GO:0008284; GO:0010468; GO:0018024; GO:0033148; GO:0035097; GO:0043627; GO:0044212; GO:0044666; GO:0045944; GO:0046872; GO:0048477; GO:0051568	histone methyltransferase complex [GO:0035097]; MLL3/4 complex [GO:0044666]; nucleoplasm [GO:0005654]; histone-lysine N-methyltransferase activity [GO:0018024]; metal ion binding [GO:0046872]; transcription regulatory region DNA binding [GO:0044212]; chromatin silencing [GO:0006342]; histone H3-K4 methylation [GO:0051568]; in utero embryonic development [GO:0001701]; oocyte growth [GO:0001555]; o…
XLOC_016169	utg19985.4	utg19985|GWHAAAA00018079:10181-10785	CP_TkMS3	0	6.70161	Inf	NA	5e-05	0.0188382	yes	KVI04106.1	hypothetical protein Ccrd_017578 [Cynara cardunculus var. scolymus]	Q9FK62	Auxin-responsive protein SAUR24 (Protein SMALL AUXIN UP RNA 24)	GO:0005886; GO:0007275; GO:0009734; GO:0040008	plasma membrane [GO:0005886]; auxin-activated signaling pathway [GO:0009734]; multicellular organism development [GO:0007275]; regulation of growth [GO:0040008]
XLOC_016189	utg1.6	utg1|GWHAAAA00012514:31612-42091	CP_TkMS3	2.14744	21.9571	3.354	5.54193	5e-05	0.0188382	yes	XP_022019914.1	probable rhamnogalacturonate lyase B [Helianthus annuus]	Q8RJP2	Rhamnogalacturonate lyase (Rhamnogalacturonase) (EC 4.2.2.23)	GO:0005576; GO:0005975; GO:0009405; GO:0030246; GO:0102210	extracellular region [GO:0005576]; carbohydrate binding [GO:0030246]; rhamnogalacturonan endolyase activity [GO:0102210]; carbohydrate metabolic process [GO:0005975]; pathogenesis [GO:0009405]
XLOC_016447	utg20169.2	utg20169|GWHAAAA00017155:9001-12081	CP_TkMS3	37.5891	5.18697	-2.85735	-5.34218	5e-05	0.0188382	yes	XP_022037342.1	protein GRAVITROPIC IN THE LIGHT 1-like [Helianthus annuus]	F4KGE8	Protein GRAVITROPIC IN THE LIGHT 1	GO:0009639; GO:0009959	negative gravitropism [GO:0009959]; response to red or far red light [GO:0009639]
XLOC_017088	utg2063.3	utg2063|GWHAAAA00002750:19296-21913	CP_TkMS3	2.49262	24.0188	3.26843	4.94297	5e-05	0.0188382	yes	KVH99786.1	EEIG1/EHBP1 N-terminal domain-containing protein [Cynara cardunculus var. scolymus]	A8HVH0	Acyl carrier protein (ACP)	GO:0005737; GO:0006633	cytoplasm [GO:0005737]; fatty acid biosynthetic process [GO:0006633]
XLOC_017857	utg21288.4	utg21288|GWHAAAA00027129:9972-12795	CP_TkMS3	0.621174	16.4089	4.72334	5.57974	0.00015	0.0422672	yes	XP_023748780.1	leucine-rich repeat extensin-like protein 4 [Lactuca sativa]	O48809	Leucine-rich repeat extensin-like protein 2 (AtLRX2) (LRR/EXTENSIN2) (Cell wall hydroxyproline-rich glycoprotein)	GO:0005576; GO:0005618; GO:0007275; GO:0071555	cell wall [GO:0005618]; extracellular region [GO:0005576]; cell wall organization [GO:0071555]; multicellular organism development [GO:0007275]
XLOC_018112	utg21517.1	utg21517|GWHAAAA00003645:0-6192	CP_TkMS3	12.497	222.126	4.15172	6.23079	5e-05	0.0188382	yes	XP_022002061.1	cellulose synthase-like protein G3 [Helianthus annuus]	Q570S7	Cellulose synthase-like protein G1 (AtCslG1) (EC 2.4.1.-)	GO:0000139; GO:0005794; GO:0005886; GO:0009833; GO:0016021; GO:0016759; GO:0016760; GO:0030244; GO:0071555	Golgi apparatus [GO:0005794]; Golgi membrane [GO:0000139]; integral component of membrane [GO:0016021]; plasma membrane [GO:0005886]; cellulose synthase (UDP-forming) activity [GO:0016760]; cellulose synthase activity [GO:0016759]; cell wall organization [GO:0071555]; cellulose biosynthetic process [GO:0030244]; plant-type primary cell wall biogenesis [GO:0009833]
XLOC_018369	utg21739.11	utg21739|GWHAAAA00019399:53733-55674	CP_TkMS3	24.8144	452.682	4.18925	6.73248	5e-05	0.0188382	yes	XP_022016226.1	(3S,6E)-nerolidol synthase 1-like [Helianthus annuus]	P0CV96	(3S,6E)-nerolidol synthase 1, chloroplastic (FvNES1) (EC 4.2.3.48)	GO:0000287; GO:0009507; GO:0010333; GO:0016114	chloroplast [GO:0009507]; magnesium ion binding [GO:0000287]; terpene synthase activity [GO:0010333]; terpenoid biosynthetic process [GO:0016114]
XLOC_018457	utg21839.7	utg21839|GWHAAAA00023542:22129-26815	CP_TkMS3	2.58375	15.9873	2.62939	4.55064	5e-05	0.0188382	yes	XP_015389935.1	PREDICTED: uncharacterized protein LOC107178828 [Citrus sinensis]	O85347	CTP synthase (EC 6.3.4.2) (Cytidine 5'-triphosphate synthase) (Cytidine triphosphate synthetase) (CTP synthetase) (CTPS) (UTP--ammonia ligase)	GO:0003883; GO:0005524; GO:0006541; GO:0044210; GO:0046872	ATP binding [GO:0005524]; CTP synthase activity [GO:0003883]; metal ion binding [GO:0046872]; 'de novo' CTP biosynthetic process [GO:0044210]; glutamine metabolic process [GO:0006541]
XLOC_018574	utg21931.8	utg21931|GWHAAAA00008495:33906-34657	CP_TkMS3	13.577	92.0064	2.76057	6.51037	5e-05	0.0188382	yes	OTG07831.1	hypothetical protein HannXRQ_Chr11g0334911 [Helianthus annuus]	Q9LXB7	Protein PELPK2 (Protein Pro-Glu-Leu|Ile|Val-Pro-Lys 2)	GO:0005576; GO:0005618; GO:0007275	cell wall [GO:0005618]; extracellular region [GO:0005576]; multicellular organism development [GO:0007275]
XLOC_018945	utg22272.6	utg22272|GWHAAAA00026916:15951-18578	CP_TkMS3	0	0.487325	Inf	NA	5e-05	0.0188382	yes	.	.	.	.	.	.
XLOC_019068	utg22367.3	utg22367|GWHAAAA00020922:13045-14007	CP_TkMS3	2.66153	0	-Inf	NA	5e-05	0.0188382	yes	KVH94205.1	hypothetical protein Ccrd_003741 [Cynara cardunculus var. scolymus]	Q9SV72	EPIDERMAL PATTERNING FACTOR-like protein 9 (EPF-like protein 9) [Cleaved into: Stomagen]	GO:0007267; GO:0010052; GO:0010374; GO:0010375; GO:0019901; GO:0048046; GO:2000038; GO:2000123	apoplast [GO:0048046]; protein kinase binding [GO:0019901]; cell-cell signaling [GO:0007267]; guard cell differentiation [GO:0010052]; positive regulation of stomatal complex development [GO:2000123]; regulation of stomatal complex development [GO:2000038]; stomatal complex development [GO:0010374]; stomatal complex patterning [GO:0010375]
XLOC_019971	utg2308.28	utg2308|GWHAAAA00015466:133368-136590	CP_TkMS3	1.58259	16.4765	3.38005	5.12838	5e-05	0.0188382	yes	XP_021997054.1	protein TIFY 10A-like isoform X2 [Helianthus annuus]	Q9LMA8	Protein TIFY 10A (Jasmonate ZIM domain-containing protein 1)	GO:0003714; GO:0005634; GO:0006351; GO:0006355; GO:0009555; GO:0009611; GO:0009753; GO:0009867; GO:0009908; GO:0031347; GO:0042742; GO:1900067; GO:1903507; GO:2000022	nucleus [GO:0005634]; transcription corepressor activity [GO:0003714]; defense response to bacterium [GO:0042742]; flower development [GO:0009908]; jasmonic acid mediated signaling pathway [GO:0009867]; negative regulation of nucleic acid-templated transcription [GO:1903507]; pollen development [GO:0009555]; regulation of cellular response to alkaline pH [GO:1900067]; regulation of defense respon…
XLOC_020100	utg23176.3	utg23176|GWHAAAA00002495:23389-24973	CP_TkMS3	0	0.982158	Inf	NA	5e-05	0.0188382	yes	WP_006108425.1	hypothetical protein [Natrialba asiatica]	.	.	.	.
XLOC_020296	utg2334.34	utg2334|GWHAAAA00004433:131531-132846	CP_TkMS3	19.9682	100.285	2.32833	5.27877	0.00015	0.0422672	yes	OTG18107.1	hypothetical protein HannXRQ_Chr08g0219501 [Helianthus annuus]	.	.	.	.
XLOC_020377	utg23402.2	utg23402|GWHAAAA00027609:6736-8871	CP_TkMS3	1.33094	12.0256	3.1756	5.08279	0.0002	0.0493118	yes	KVI07884.1	Major facilitator superfamily [Cynara cardunculus var. scolymus]	F4I9E1	Protein NUCLEAR FUSION DEFECTIVE 4	GO:0000741; GO:0009651; GO:0010197; GO:0016021	integral component of membrane [GO:0016021]; karyogamy [GO:0000741]; polar nucleus fusion [GO:0010197]; response to salt stress [GO:0009651]
XLOC_020396	utg23421.5	utg23421|GWHAAAA00016029:23144-23915	CP_TkMS3	63.0241	9.36167	-2.75107	-6.18827	0.0001	0.0322423	yes	KVH97678.1	Pectinesterase inhibitor [Cynara cardunculus var. scolymus]	Q9SB37	Pectinesterase inhibitor 7 (Pectin methylesterase inhibitor 7) (AtPMEI7)	GO:0004857; GO:0009641; GO:0048046	apoplast [GO:0048046]; enzyme inhibitor activity [GO:0004857]; shade avoidance [GO:0009641]
XLOC_021038	utg2406.6	utg2406|GWHAAAA00009348:52299-54546	CP_TkMS3	0	2.8435	Inf	NA	5e-05	0.0188382	yes	XP_022016577.1	transcription factor bHLH63-like [Helianthus annuus]	Q8GY61	Transcription factor bHLH63 (Basic helix-loop-helix protein 63) (AtbHLH63) (bHLH 63) (Protein CRYPTOCHROME INTERACTING BASIC-HELIX-LOOP-HELIX 1) (Transcription factor EN 84) (bHLH transcription factor bHLH063)	GO:0003677; GO:0003700; GO:0005634; GO:0006351; GO:0009637; GO:0009908; GO:0009911; GO:0046983	nucleus [GO:0005634]; DNA binding [GO:0003677]; DNA binding transcription factor activity [GO:0003700]; protein dimerization activity [GO:0046983]; flower development [GO:0009908]; positive regulation of flower development [GO:0009911]; response to blue light [GO:0009637]; transcription, DNA-templated [GO:0006351]
XLOC_022201	utg2520.1	utg2520|GWHAAAA00011463:7114-9843	CP_TkMS3	1.45753	39.4616	4.75885	6.21304	0.0001	0.0322423	yes	KVH90087.1	BAG domain-containing protein [Cynara cardunculus var. scolymus]	Q0WUQ1	BAG family molecular chaperone regulator 1 (Bcl-2-associated athanogene 1)	GO:0005634; GO:0005739; GO:0005829; GO:0051087; GO:0071629	cytosol [GO:0005829]; mitochondrion [GO:0005739]; nucleus [GO:0005634]; chaperone binding [GO:0051087]; cytoplasm protein quality control by the ubiquitin-proteasome system [GO:0071629]
XLOC_022375	utg25367.4	utg25367|GWHAAAA00031070:15414-17799	CP_TkMS3	0	2.17445	Inf	NA	0.0002	0.0493118	yes	OTG15910.1	hypothetical protein HannXRQ_Chr09g0265591 [Helianthus annuus]	Q9QZI8	Serine incorporator 1 (Axotomy-induced glyco/Golgi protein 2) (Membrane protein TMS-2) (Tumor differentially expressed protein 1-like) (Tumor differentially expressed protein 2)	GO:0005789; GO:0005886; GO:0006658; GO:0006665; GO:0008654; GO:0015194; GO:0016021; GO:0019899; GO:0030674; GO:0044091; GO:0070062; GO:1904219; GO:1904222	endoplasmic reticulum membrane [GO:0005789]; extracellular exosome [GO:0070062]; integral component of membrane [GO:0016021]; plasma membrane [GO:0005886]; enzyme binding [GO:0019899]; L-serine transmembrane transporter activity [GO:0015194]; protein binding, bridging [GO:0030674]; membrane biogenesis [GO:0044091]; phosphatidylserine metabolic process [GO:0006658]; phospholipid biosynthetic proce…
XLOC_022689	utg25688.5	utg25688|GWHAAAA00007509:13882-18183	CP_TkMS3	10.2852	85.8168	3.06069	5.19919	5e-05	0.0188382	yes	ARO49674.1	cold- and ABA-responsive R2R3 MYB transciption factor 5 [Cichorium intybus]	Q9FGY3	Transcription factor MYB78 (Myb-related protein 78) (AtMYB78)	GO:0003700; GO:0005634; GO:0006351; GO:0009651; GO:0009737; GO:0043565; GO:1902074	nucleus [GO:0005634]; DNA binding transcription factor activity [GO:0003700]; sequence-specific DNA binding [GO:0043565]; response to abscisic acid [GO:0009737]; response to salt [GO:1902074]; response to salt stress [GO:0009651]; transcription, DNA-templated [GO:0006351]
XLOC_023672	utg26678.2	utg26678|GWHAAAA00029247:19740-24041	CP_TkMS3	19.6671	260.948	3.72991	6.05533	0.00015	0.0422672	yes	OTF86327.1	putative lysine histidine transporter 1 [Helianthus annuus]	Q9FKS8	Lysine histidine transporter 1	GO:0005886; GO:0015171; GO:0015293; GO:0016021; GO:0043090; GO:0080167	integral component of membrane [GO:0016021]; plasma membrane [GO:0005886]; amino acid transmembrane transporter activity [GO:0015171]; symporter activity [GO:0015293]; amino acid import [GO:0043090]; response to karrikin [GO:0080167]
XLOC_024950	utg28051.5	utg28051|GWHAAAA00018161:32550-36024	CP_TkMS3	2.76184	18.6657	2.75668	4.28362	5e-05	0.0188382	yes	XP_021975543.1	serine/threonine protein phosphatase 2A 57 kDa regulatory subunit B' beta isoform-like [Helianthus annuus]	O04375	Serine/threonine protein phosphatase 2A 57 kDa regulatory subunit B' alpha isoform (AtB' alpha) (PP2A, B' subunit, alpha isoform)	GO:0000159; GO:0005634; GO:0005737; GO:0009742; GO:0019888; GO:0042325	cytoplasm [GO:0005737]; nucleus [GO:0005634]; protein phosphatase type 2A complex [GO:0000159]; protein phosphatase regulator activity [GO:0019888]; brassinosteroid mediated signaling pathway [GO:0009742]; regulation of phosphorylation [GO:0042325]
XLOC_025761	utg2887.17	utg2887|GWHAAAA00016059:73733-76941	CP_TkMS3	26.5186	4.34807	-2.60856	-4.70756	5e-05	0.0188382	yes	XP_021978295.1	microtubule-associated protein TORTIFOLIA1-like [Helianthus annuus]	Q9T041	Microtubule-associated protein TORTIFOLIA1 (Microtubule-associated protein SPIRAL2) (Protein CONVOLUTA)	GO:0007275; GO:0008017; GO:0009826; GO:0010005; GO:0010031	cortical microtubule, transverse to long axis [GO:0010005]; microtubule binding [GO:0008017]; circumnutation [GO:0010031]; multicellular organism development [GO:0007275]; unidimensional cell growth [GO:0009826]
XLOC_025841	-	utg2893|GWHAAAA00006337:17345-18385	CP_TkMS3	25.3395	188.408	2.8944	8.60535	5e-05	0.0188382	yes	.	.	.	.	.	.
XLOC_026183	utg29274.8	utg29274|GWHAAAA00026313:12412-15581	CP_TkMS3	4.18672	22.3748	2.41799	3.91705	0.0001	0.0322423	yes	KVI06936.1	Cation efflux protein [Cynara cardunculus var. scolymus]	Q5NA18	Metal tolerance protein 5 (OsMTP5)	GO:0005774; GO:0008324; GO:0016021	integral component of membrane [GO:0016021]; vacuolar membrane [GO:0005774]; cation transmembrane transporter activity [GO:0008324]
XLOC_026796	utg29958.1	utg29958|GWHAAAA00006834:11805-13653	CP_TkMS3	3.70479	51.4995	3.7971	6.7581	5e-05	0.0188382	yes	OUX23264.1	hypothetical protein CBE15_06710 [Euryarchaeota archaeon TMED255]	Q5NBT9	Protein TPR1 (Aberrant spikelet and panicle1-related 2) (Protein ASP1-RELATED 2) (OsASPR2) (Topless-related protein 1) (Topless-related protein 2) (OsTPR2)	GO:0006355	regulation of transcription, DNA-templated [GO:0006355]
XLOC_026797	utg29958.1	utg29958|GWHAAAA00006834:10483-11602	CP_TkMS3	0	1.24361	Inf	NA	0.0001	0.0322423	yes	OUX23264.1	hypothetical protein CBE15_06710 [Euryarchaeota archaeon TMED255]	Q5NBT9	Protein TPR1 (Aberrant spikelet and panicle1-related 2) (Protein ASP1-RELATED 2) (OsASPR2) (Topless-related protein 1) (Topless-related protein 2) (OsTPR2)	GO:0006355	regulation of transcription, DNA-templated [GO:0006355]
XLOC_026958	utg30136.4	utg30136|GWHAAAA00025787:28186-30269	CP_TkMS3	4.1799	36.5427	3.12804	5.93976	0.0001	0.0322423	yes	XP_022034129.1	uncharacterized protein LOC110936099 [Helianthus annuus]	O42807	Feruloyl esterase A (EC 3.1.1.73) (Cinnamoyl esterase) (FAE-III) (Ferulic acid esterase A)	GO:0005576; GO:0006629; GO:0016998; GO:0030245; GO:0030248; GO:0030600; GO:0045490; GO:0045493	extracellular region [GO:0005576]; cellulose binding [GO:0030248]; feruloyl esterase activity [GO:0030600]; cell wall macromolecule catabolic process [GO:0016998]; cellulose catabolic process [GO:0030245]; lipid metabolic process [GO:0006629]; pectin catabolic process [GO:0045490]; xylan catabolic process [GO:0045493]
XLOC_027061	-	utg30275|GWHAAAA00017524:15643-19740	CP_TkMS3	0	1.55164	Inf	NA	5e-05	0.0188382	yes	.	.	.	.	.	.
XLOC_027098	utg3031.19	utg3031|GWHAAAA00007249:64868-69679	CP_TkMS3	7.26092	63.0329	3.11788	4.88488	5e-05	0.0188382	yes	XP_021987728.1	uncharacterized protein LOC110884335 isoform X1 [Helianthus annuus]	P19515	Lipase (EC 3.1.1.3) (Triacylglycerol lipase)	GO:0004806; GO:0016042; GO:0046872	metal ion binding [GO:0046872]; triglyceride lipase activity [GO:0004806]; lipid catabolic process [GO:0016042]
XLOC_027465	utg30710.11	utg30710|GWHAAAA00003228:27930-29889	CP_TkMS3	77.693	816.46	3.39353	4.44969	5e-05	0.0188382	yes	.	.	.	.	.	.
XLOC_027658	-	utg30963|GWHAAAA00028085:4837-5613	CP_TkMS3	0	3.39662	Inf	NA	5e-05	0.0188382	yes	.	.	.	.	.	.
XLOC_027687	utg3099.6	utg3099|GWHAAAA00002895:22016-26090	CP_TkMS3	12.8754	84.7888	2.71926	4.3684	5e-05	0.0188382	yes	.	.	.	.	.	.
XLOC_027764	utg31094.4	utg31094|GWHAAAA00001765:9653-18224	CP_TkMS3	2.45949	30.5441	3.63446	5.16117	5e-05	0.0188382	yes	ACB87531.1	beta-amyrin synthase [Artemisia annua]	O82146	Beta-Amyrin Synthase 2 (EC 5.4.99.39)	GO:0016866	intramolecular transferase activity [GO:0016866]
XLOC_027928	-	utg31257|GWHAAAA00021407:9999-11612	CP_TkMS3	0	1.1703	Inf	NA	5e-05	0.0188382	yes	.	.	.	.	.	.
XLOC_027963	utg3128.10	utg3128|GWHAAAA00010655:62065-67305	CP_TkMS3	0	0.511079	Inf	NA	0.0002	0.0493118	yes	KVI09332.1	Senescence regulator [Cynara cardunculus var. scolymus]	Q3U0B3	Dehydrogenase/reductase SDR family member 11 (17-beta-hydroxysteroid dehydrogenase) (3-beta-hydroxysteroid 3-dehydrogenase) (EC 1.1.1.270) (Estradiol 17-beta-dehydrogenase) (EC 1.1.1.62) (Short-chain dehydrogenase/reductase family 24C member 1)	GO:0000166; GO:0000253; GO:0004303; GO:0005576; GO:0006694; GO:0006703; GO:0072555; GO:0072582	extracellular region [GO:0005576]; 17-beta-hydroxysteroid dehydrogenase (NADP+) activity [GO:0072582]; 17-beta-ketosteroid reductase activity [GO:0072555]; 3-keto sterol reductase activity [GO:0000253]; estradiol 17-beta-dehydrogenase activity [GO:0004303]; nucleotide binding [GO:0000166]; estrogen biosynthetic process [GO:0006703]; steroid biosynthetic process [GO:0006694]
XLOC_027993	-	utg31312|GWHAAAA00028700:13118-15827	CP_TkMS3	0	0.614696	Inf	NA	5e-05	0.0188382	yes	.	.	.	.	.	.
XLOC_028438	utg31876.3	utg31876|GWHAAAA00026026:13109-16400	CP_TkMS3	12.6918	1.97572	-2.68344	-4.53839	0.00015	0.0422672	yes	XP_021990203.1	peroxidase 17 [Helianthus annuus]	Q9SJZ2	Peroxidase 17 (Atperox P17) (EC 1.11.1.7) (ATP25a)	GO:0004601; GO:0005576; GO:0005773; GO:0005829; GO:0006979; GO:0009505; GO:0009809; GO:0010228; GO:0020037; GO:0042744; GO:0046872	cytosol [GO:0005829]; extracellular region [GO:0005576]; plant-type cell wall [GO:0009505]; vacuole [GO:0005773]; heme binding [GO:0020037]; metal ion binding [GO:0046872]; peroxidase activity [GO:0004601]; hydrogen peroxide catabolic process [GO:0042744]; lignin biosynthetic process [GO:0009809]; response to oxidative stress [GO:0006979]; vegetative to reproductive phase transition of meristem […
XLOC_028653	-	utg32141|GWHAAAA00010767:20427-20681	CP_TkMS3	0	19.8773	Inf	NA	0.00015	0.0422672	yes	.	.	.	.	.	.
XLOC_028743	-	utg32246|GWHAAAA00024401:17546-23041	CP_TkMS3	12.9877	109.256	3.07249	4.64128	5e-05	0.0188382	yes	.	.	.	.	.	.
XLOC_029656	-	utg33483|GWHAAAA00030658:6705-9115	CP_TkMS3	29.2089	220.231	2.91454	6.2318	5e-05	0.0188382	yes	.	.	.	.	.	.
XLOC_029995	-	utg33934|GWHAAAA00029400:9069-10380	CP_TkMS3	2.27315	0	-Inf	NA	5e-05	0.0188382	yes	.	.	.	.	.	.
XLOC_030189	utg34145.3	utg34145|GWHAAAA00007390:8570-12290	CP_TkMS3	81.6659	15.0863	-2.43649	-4.59091	0.0002	0.0493118	yes	XP_022021461.1	cytochrome P450 85A1-like [Helianthus annuus]	Q43147	Cytochrome P450 85A1 (EC 1.14.-.-) (C6-oxidase) (Dwarf protein)	GO:0004497; GO:0005506; GO:0007275; GO:0010268; GO:0016021; GO:0016125; GO:0016132; GO:0016705; GO:0020037	integral component of membrane [GO:0016021]; heme binding [GO:0020037]; iron ion binding [GO:0005506]; monooxygenase activity [GO:0004497]; oxidoreductase activity, acting on paired donors, with incorporation or reduction of molecular oxygen [GO:0016705]; brassinosteroid biosynthetic process [GO:0016132]; brassinosteroid homeostasis [GO:0010268]; multicellular organism development [GO:0007275]; s…
XLOC_030652	utg34831.9	utg34831|GWHAAAA00027722:25392-32092	CP_TkMS3	0	1.65641	Inf	NA	0.0002	0.0493118	yes	XP_022034077.1	auxin-responsive protein SAUR21-like [Helianthus annuus]	Q9FK62	Auxin-responsive protein SAUR24 (Protein SMALL AUXIN UP RNA 24)	GO:0005886; GO:0007275; GO:0009734; GO:0040008	plasma membrane [GO:0005886]; auxin-activated signaling pathway [GO:0009734]; multicellular organism development [GO:0007275]; regulation of growth [GO:0040008]
XLOC_031305	-	utg35720|GWHAAAA00015988:5953-7622	CP_TkMS3	21.2315	241.003	3.50477	6.82809	5e-05	0.0188382	yes	.	.	.	.	.	.
XLOC_031388	utg35854.4	utg35854|GWHAAAA00029118:10981-14816	CP_TkMS3	1.6533	19.2399	3.54068	4.58104	0.00015	0.0422672	yes	ASL72070.1	ERF [Taraxacum kok-saghyz]	Q9SZ06	Ethylene-responsive transcription factor ERF109	GO:0003677; GO:0003700; GO:0005634; GO:0006351; GO:0009873; GO:0010087; GO:0010200; GO:0050832; GO:0051301	nucleus [GO:0005634]; DNA binding [GO:0003677]; DNA binding transcription factor activity [GO:0003700]; cell division [GO:0051301]; defense response to fungus [GO:0050832]; ethylene-activated signaling pathway [GO:0009873]; phloem or xylem histogenesis [GO:0010087]; response to chitin [GO:0010200]; transcription, DNA-templated [GO:0006351]
XLOC_031516	utg36001.7	utg36001|GWHAAAA00010909:28110-30507	CP_TkMS3	0	1.30149	Inf	NA	5e-05	0.0188382	yes	KVI06907.1	AAA+ ATPase domain-containing protein [Cynara cardunculus var. scolymus]	O80946	ABC transporter G family member 1 (ABC transporter ABCG.1) (AtABCG1) (White-brown complex homolog protein 1) (AtWBC1)	GO:0005524; GO:0005886; GO:0009624; GO:0010208; GO:0016021; GO:0042626	integral component of membrane [GO:0016021]; plasma membrane [GO:0005886]; ATP binding [GO:0005524]; ATPase activity, coupled to transmembrane movement of substances [GO:0042626]; pollen wall assembly [GO:0010208]; response to nematode [GO:0009624]
XLOC_031887	utg36469.3	utg36469|GWHAAAA00024183:16352-24292	CP_TkMS3	1.92203	16.6909	3.11836	4.50296	5e-05	0.0188382	yes	XP_021998098.1	putative calcium-binding protein CML23 [Helianthus annuus]	Q8RYJ8	Putative calcium-binding protein CML19 (Calmodulin-like protein 19)	GO:0005509	calcium ion binding [GO:0005509]
XLOC_032062	utg36725.3	utg36725|GWHAAAA00000997:17393-19665	CP_TkMS3	0	0.551651	Inf	NA	0.00015	0.0422672	yes	XP_021981398.1	patatin-like protein 3 [Helianthus annuus]	Q9SV43	Patatin-like protein 7 (AtPLP7) (EC 3.1.1.-) (Patatin-related phospholipase A IIIbeta) (pPLAIIIb) (Phospholipase A IIIA) (AtPLAIIIA)	GO:0004620; GO:0005886; GO:0006644; GO:0016042; GO:0019374; GO:0040008; GO:0047617; GO:0051707	plasma membrane [GO:0005886]; acyl-CoA hydrolase activity [GO:0047617]; phospholipase activity [GO:0004620]; galactolipid metabolic process [GO:0019374]; lipid catabolic process [GO:0016042]; phospholipid metabolic process [GO:0006644]; regulation of growth [GO:0040008]; response to other organism [GO:0051707]
XLOC_032670	utg378.10	utg378|GWHAAAA00015918:33810-35854	CP_TkMS3	1.37006	0	-Inf	NA	5e-05	0.0188382	yes	XP_021981381.1	xyloglucan endotransglucosylase/hydrolase protein 15-like [Helianthus annuus]	Q38907	Probable xyloglucan endotransglucosylase/hydrolase protein 25 (At-XTH25) (XTH-25) (EC 2.4.1.207)	GO:0004553; GO:0005618; GO:0009832; GO:0010411; GO:0016762; GO:0048046; GO:0071555	apoplast [GO:0048046]; cell wall [GO:0005618]; hydrolase activity, hydrolyzing O-glycosyl compounds [GO:0004553]; xyloglucan:xyloglucosyl transferase activity [GO:0016762]; cell wall organization [GO:0071555]; plant-type cell wall biogenesis [GO:0009832]; xyloglucan metabolic process [GO:0010411]
XLOC_033353	-	utg4038|GWHAAAA00028339:28426-29653	CP_TkMS3	0	1.56085	Inf	NA	5e-05	0.0188382	yes	.	.	.	.	.	.
XLOC_033753	utg4202.2	utg4202|GWHAAAA00026804:27717-35924	CP_TkMS3	3.47712	21.6871	2.64087	4.13204	0.0001	0.0322423	yes	XP_022016910.1	zinc finger CCCH domain-containing protein 29-like [Helianthus annuus]	Q9XEE6	Zinc finger CCCH domain-containing protein 29 (AtC3H29) (AtSZF2)	GO:0003677; GO:0003700; GO:0005634; GO:0006355; GO:0009409; GO:0010200; GO:0046872; GO:0050832	nucleus [GO:0005634]; DNA binding [GO:0003677]; DNA binding transcription factor activity [GO:0003700]; metal ion binding [GO:0046872]; defense response to fungus [GO:0050832]; regulation of transcription, DNA-templated [GO:0006355]; response to chitin [GO:0010200]; response to cold [GO:0009409]
XLOC_034216	utg433.3	utg433|GWHAAAA00002956:17786-20210	CP_TkMS3	11.9677	119.601	3.32101	6.055	5e-05	0.0188382	yes	KVI02897.1	cytochrome P450 [Cynara cardunculus var. scolymus]	Q42600	Cytochrome P450 84A1 (EC 1.14.-.-) (Ferulate-5-hydroxylase) (F5H)	GO:0004497; GO:0005506; GO:0005783; GO:0009699; GO:0009809; GO:0010224; GO:0016020; GO:0016021; GO:0016709; GO:0020037	endoplasmic reticulum [GO:0005783]; integral component of membrane [GO:0016021]; membrane [GO:0016020]; heme binding [GO:0020037]; iron ion binding [GO:0005506]; monooxygenase activity [GO:0004497]; oxidoreductase activity, acting on paired donors, with incorporation or reduction of molecular oxygen, NAD(P)H as one donor, and incorporation of one atom of oxygen [GO:0016709]; lignin biosynthetic p…
XLOC_034279	utg4368.20	utg4368|GWHAAAA00015543:58033-61046	CP_TkMS3	6.513	46.3014	2.82966	5.32856	5e-05	0.0188382	yes	KVH92236.1	HAD-like domain-containing protein [Cynara cardunculus var. scolymus]	Q5HZ05	Probable trehalose-phosphate phosphatase J (AtTPPJ) (EC 3.1.3.12) (Trehalose 6-phosphate phosphatase)	GO:0004805; GO:0005634; GO:0005730; GO:0005992; GO:0046686	nucleolus [GO:0005730]; nucleus [GO:0005634]; trehalose-phosphatase activity [GO:0004805]; response to cadmium ion [GO:0046686]; trehalose biosynthetic process [GO:0005992]
XLOC_034582	utg4484.6	utg4484|GWHAAAA00017542:31174-32996	CP_TkMS3	2.21293	39.0754	4.14223	5.55356	5e-05	0.0188382	yes	CBI19508.3	unnamed protein product, partial [Vitis vinifera]	Q7T141	Peptidase inhibitor 15-A	GO:0005576; GO:0007275; GO:0030414	extracellular region [GO:0005576]; peptidase inhibitor activity [GO:0030414]; multicellular organism development [GO:0007275]
XLOC_034651	utg4513.15	utg4513|GWHAAAA00006571:67137-69597	CP_TkMS3	2.63936	29.3459	3.4749	4.86741	5e-05	0.0188382	yes	WP_082540955.1	glutathione S-transferase [Pseudolabrys sp. Root1462]	P09250	Thymidine kinase (EC 2.7.1.21)	GO:0004797; GO:0005524; GO:0006230; GO:0071897	ATP binding [GO:0005524]; thymidine kinase activity [GO:0004797]; DNA biosynthetic process [GO:0071897]; TMP biosynthetic process [GO:0006230]
XLOC_035148	utg4678.13	utg4678|GWHAAAA00005601:57993-63364	CP_TkMS3	6.85641	43.4637	2.66429	4.3585	5e-05	0.0188382	yes	XP_002462277.1	uncharacterized protein At4g04775 [Sorghum bicolor]	P38530	Heat shock factor protein 2 (HSF 2) (HSF 3B) (HSTF 3B) (Heat shock transcription factor 2) (HSTF 2)	GO:0000790; GO:0001046; GO:0003700; GO:0005634; GO:0005737; GO:0006351; GO:0006357; GO:0009416; GO:0010243; GO:0014070; GO:0031397; GO:0042803; GO:0050821; GO:0070207; GO:1903935	cytoplasm [GO:0005737]; nuclear chromatin [GO:0000790]; nucleus [GO:0005634]; core promoter sequence-specific DNA binding [GO:0001046]; DNA binding transcription factor activity [GO:0003700]; protein homodimerization activity [GO:0042803]; negative regulation of protein ubiquitination [GO:0031397]; protein homotrimerization [GO:0070207]; protein stabilization [GO:0050821]; regulation of transcrip…
XLOC_035341	utg4733.1	utg4733|GWHAAAA00001855:2561-3616	CP_TkMS3	8.86291	53.9986	2.60707	5.42313	5e-05	0.0188382	yes	CDP14124.1	unnamed protein product [Coffea canephora]	O22227	Protein MIZU-KUSSEI 1	GO:0005737; GO:0005783; GO:0005789; GO:0009658; GO:0010274; GO:0016020; GO:0032541	cortical endoplasmic reticulum [GO:0032541]; cytoplasm [GO:0005737]; endoplasmic reticulum [GO:0005783]; endoplasmic reticulum membrane [GO:0005789]; membrane [GO:0016020]; chloroplast organization [GO:0009658]; hydrotropism [GO:0010274]
XLOC_035344	utg4734.2	utg4734|GWHAAAA00020790:7668-9736	CP_TkMS3	17.4312	228.535	3.71267	5.46516	5e-05	0.0188382	yes	KVI03717.1	UDP-glucuronosyl/UDP-glucosyltransferase [Cynara cardunculus var. scolymus]	O64733	UDP-glycosyltransferase 87A2 (EC 2.4.1.-)	GO:0005634; GO:0005737; GO:0005829; GO:0008152; GO:0009909; GO:0080043; GO:0080044	cytoplasm [GO:0005737]; cytosol [GO:0005829]; nucleus [GO:0005634]; quercetin 3-O-glucosyltransferase activity [GO:0080043]; quercetin 7-O-glucosyltransferase activity [GO:0080044]; metabolic process [GO:0008152]; regulation of flower development [GO:0009909]
XLOC_035720	-	utg4899|GWHAAAA00019520:39441-47111	CP_TkMS3	2.25259	22.8959	3.34544	5.71563	5e-05	0.0188382	yes	.	.	.	.	.	.
XLOC_036195	utg5046.7	utg5046|GWHAAAA00010457:33240-40826	CP_TkMS3	1.16959	0	-Inf	NA	5e-05	0.0188382	yes	KJB20310.1	hypothetical protein B456_003G143200 [Gossypium raimondii]	Q8GW29	Cytokinin riboside 5'-monophosphate phosphoribohydrolase LOG7 (EC 3.2.2.n1) (Protein LONELY GUY 7)	GO:0005634; GO:0005829; GO:0009691; GO:0016787	cytosol [GO:0005829]; nucleus [GO:0005634]; hydrolase activity [GO:0016787]; cytokinin biosynthetic process [GO:0009691]
XLOC_036526	utg5187.9	utg5187|GWHAAAA00010723:30718-37443	CP_TkMS3	7.72555	1.13737	-2.76394	-3.77549	5e-05	0.0188382	yes	XP_001429586.1	hypothetical protein [Paramecium tetraurelia strain d4-2]	.	.	.	.
XLOC_036567	utg5199.27	utg5199|GWHAAAA00019117:132961-136241	CP_TkMS3	1.91872	18.1905	3.24497	4.86094	5e-05	0.0188382	yes	XP_021974291.1	beta-fructofuranosidase, insoluble isoenzyme CWINV3-like [Helianthus annuus]	Q43866	Beta-fructofuranosidase, insoluble isoenzyme CWINV1 (EC 3.2.1.26) (Cell wall beta-fructosidase 1) (AtbetaFRUCT1) (Cell wall invertase 1) (AtcwINV1) (Sucrose hydrolase 1)	GO:0004564; GO:0004575; GO:0005618; GO:0005886; GO:0005975; GO:0009611; GO:0048046; GO:0050832; GO:0080167	apoplast [GO:0048046]; cell wall [GO:0005618]; plasma membrane [GO:0005886]; beta-fructofuranosidase activity [GO:0004564]; sucrose alpha-glucosidase activity [GO:0004575]; carbohydrate metabolic process [GO:0005975]; defense response to fungus [GO:0050832]; response to karrikin [GO:0080167]; response to wounding [GO:0009611]
XLOC_036702	utg5248.1	utg5248|GWHAAAA00006708:650-4346	CP_TkMS3	3.17036	28.4619	3.16631	4.84531	5e-05	0.0188382	yes	KVI12111.1	Peptidyl-prolyl cis-trans isomerase, FKBP-type [Cynara cardunculus var. scolymus]	P04052	DNA-directed RNA polymerase II subunit RPB1 (RNA polymerase II subunit B1) (EC 2.7.7.6) (DNA-directed RNA polymerase III largest subunit)	GO:0003677; GO:0003899; GO:0005634; GO:0005665; GO:0005700; GO:0005703; GO:0006366; GO:0007095; GO:0046872	DNA-directed RNA polymerase II, core complex [GO:0005665]; nucleus [GO:0005634]; polytene chromosome [GO:0005700]; polytene chromosome puff [GO:0005703]; DNA binding [GO:0003677]; DNA-directed 5'-3' RNA polymerase activity [GO:0003899]; metal ion binding [GO:0046872]; mitotic G2 DNA damage checkpoint [GO:0007095]; transcription from RNA polymerase II promoter [GO:0006366]
XLOC_036865	utg5311.2	utg5311|GWHAAAA00030147:6901-8324	CP_TkMS3	86.0804	1109.45	3.68802	7.91137	5e-05	0.0188382	yes	XP_022033455.1	anther-specific protein SF18-like [Helianthus annuus]	P22357	Anther-specific protein SF18 (Defensin-like protein) (Fragment)	GO:0005576; GO:0005618; GO:0006952; GO:0071555	cell wall [GO:0005618]; extracellular region [GO:0005576]; cell wall organization [GO:0071555]; defense response [GO:0006952]
XLOC_036939	utg533.3	utg533|GWHAAAA00015391:21591-24296	CP_TkMS3	0	0.797595	Inf	NA	5e-05	0.0188382	yes	XP_022020569.1	aluminum-activated malate transporter 14-like [Helianthus annuus]	O49696	Aluminum-activated malate transporter 12 (AtALMT12) (Quick anion channel 1)	GO:0005886; GO:0008272; GO:0008509; GO:0009705; GO:0010118; GO:0012505; GO:0015140; GO:0016021	endomembrane system [GO:0012505]; integral component of membrane [GO:0016021]; plant-type vacuole membrane [GO:0009705]; plasma membrane [GO:0005886]; anion transmembrane transporter activity [GO:0008509]; malate transmembrane transporter activity [GO:0015140]; stomatal movement [GO:0010118]; sulfate transport [GO:0008272]
XLOC_037018	utg5381.2	utg5381|GWHAAAA00017409:10306-13055	CP_TkMS3	4.81381	28.7485	2.57824	4.65274	5e-05	0.0188382	yes	BAE72091.1	Lactuca sativa 9-cis-epoxycarotenoid dioxygenase 2	Q9M6E8	9-cis-epoxycarotenoid dioxygenase NCED1, chloroplastic (EC 1.13.11.51) (PvNCED1)	GO:0009535; GO:0009688; GO:0045549; GO:0046872	chloroplast thylakoid membrane [GO:0009535]; 9-cis-epoxycarotenoid dioxygenase activity [GO:0045549]; metal ion binding [GO:0046872]; abscisic acid biosynthetic process [GO:0009688]
XLOC_037579	-	utg5576|GWHAAAA00005466:85492-86167	CP_TkMS3	0	2.46441	Inf	NA	5e-05	0.0188382	yes	.	.	.	.	.	.
XLOC_037927	utg5711.2	utg5711|GWHAAAA00015732:17440-18631	CP_TkMS3	28.0458	162.416	2.53384	5.32436	0.00015	0.0422672	yes	ACF15449.1	dehydrin 2 [Cichorium intybus]	P25863	Dehydrin Xero 1	GO:0005829; GO:0009414; GO:0009631; GO:0009737	cytosol [GO:0005829]; cold acclimation [GO:0009631]; response to abscisic acid [GO:0009737]; response to water deprivation [GO:0009414]
XLOC_038122	utg5800.3	utg5800|GWHAAAA00019989:18743-20346	CP_TkMS3	72.9778	13.4389	-2.44104	-5.21219	0.0001	0.0322423	yes	AAC49326.1	wounding-induced ribonuclease gene [Zinnia violacea]	P80022	Extracellular ribonuclease LE (RNase LE) (EC 3.1.27.1)	GO:0003723; GO:0005615; GO:0005618; GO:0033897	cell wall [GO:0005618]; extracellular space [GO:0005615]; ribonuclease T2 activity [GO:0033897]; RNA binding [GO:0003723]
XLOC_038341	utg5922.11	utg5922|GWHAAAA00012757:31705-37648	CP_TkMS3	10.0875	82.3462	3.02913	4.58874	5e-05	0.0188382	yes	KVH88331.1	Concanavalin A-like lectin/glucanase, subgroup [Cynara cardunculus var. scolymus]	Q8S9L6	Cysteine-rich receptor-like protein kinase 29 (Cysteine-rich RLK29) (EC 2.7.11.-)	GO:0004674; GO:0005524; GO:0005773; GO:0005886; GO:0006468; GO:0009737; GO:0016021	integral component of membrane [GO:0016021]; plasma membrane [GO:0005886]; vacuole [GO:0005773]; ATP binding [GO:0005524]; protein serine/threonine kinase activity [GO:0004674]; protein phosphorylation [GO:0006468]; response to abscisic acid [GO:0009737]
XLOC_038575	utg5999.22	utg5999|GWHAAAA00027737:97034-99459	CP_TkMS3	9.84522	58.9787	2.5827	4.20454	5e-05	0.0188382	yes	KVI09954.1	Non-heme dioxygenase N-terminal domain-containing protein [Cynara cardunculus var. scolymus]	Q9SRM3	Probable 2-oxoglutarate-dependent dioxygenase At3g111800 (EC 1.14.11.-)	GO:0009813; GO:0046872; GO:0051213	dioxygenase activity [GO:0051213]; metal ion binding [GO:0046872]; flavonoid biosynthetic process [GO:0009813]
XLOC_038886	utg6177.3	utg6177|GWHAAAA00006063:17663-21093	CP_TkMS3	7.29108	59.2828	3.02341	5.51326	5e-05	0.0188382	yes	XP_022039294.1	uncharacterized protein LOC110941911 [Helianthus annuus]	Q54DS3	Transmembrane protein DDB_G0292058	GO:0016021	integral component of membrane [GO:0016021]
XLOC_040651	utg6955.5	utg6955|GWHAAAA00004298:43309-48232	CP_TkMS3	1.00448	8.30945	3.04831	4.31999	0.0002	0.0493118	yes	XP_022012657.1	uncharacterized protein LOC110912273 isoform X4 [Helianthus annuus]	Q15653	NF-kappa-B inhibitor beta (NF-kappa-BIB) (I-kappa-B-beta) (IkB-B) (IkB-beta) (IkappaBbeta) (Thyroid receptor-interacting protein 9) (TR-interacting protein 9) (TRIP-9)	GO:0003713; GO:0004871; GO:0005634; GO:0005829; GO:0006351; GO:0007165; GO:0051092; GO:0071222	cytosol [GO:0005829]; nucleus [GO:0005634]; signal transducer activity [GO:0004871]; transcription coactivator activity [GO:0003713]; cellular response to lipopolysaccharide [GO:0071222]; positive regulation of NF-kappaB transcription factor activity [GO:0051092]; signal transduction [GO:0007165]; transcription, DNA-templated [GO:0006351]
XLOC_040946	utg7069.7	utg7069|GWHAAAA00025899:36491-37804	CP_TkMS3	0	1.10293	Inf	NA	5e-05	0.0188382	yes	OTG19316.1	putative zinc finger, CCHC-type [Helianthus annuus]	Q62834	Cell division cycle protein 123 homolog (Protein D123)	GO:0005737; GO:0006417; GO:0007050; GO:0051301	cytoplasm [GO:0005737]; cell cycle arrest [GO:0007050]; cell division [GO:0051301]; regulation of translation [GO:0006417]
XLOC_040968	-	utg7078|GWHAAAA00005665:18130-19702	CP_TkMS3	63.1541	454.651	2.84781	6.55961	5e-05	0.0188382	yes	.	.	.	.	.	.
XLOC_041296	utg7251.27	utg7251|GWHAAAA00004300:125497-127562	CP_TkMS3	7.4931	50.0979	2.74112	5.09157	5e-05	0.0188382	yes	KVH98616.1	hypothetical protein Ccrd_023165 [Cynara cardunculus var. scolymus]	A2Z9A6	UPF0496 protein 4	GO:0016021	integral component of membrane [GO:0016021]
XLOC_041510	utg7327.31	utg7327|GWHAAAA00008735:165861-168898	CP_TkMS3	24.9486	1.66627	-3.90427	-6.43674	5e-05	0.0188382	yes	KVH97260.1	Aminotransferase, class I/classII [Cynara cardunculus var. scolymus]	Q07262	1-aminocyclopropane-1-carboxylate synthase (ACC synthase) (EC 4.4.1.14) (S-adenosyl-L-methionine methylthioadenosine-lyase)	GO:0009693; GO:0009835; GO:0016847; GO:0030170	1-aminocyclopropane-1-carboxylate synthase activity [GO:0016847]; pyridoxal phosphate binding [GO:0030170]; ethylene biosynthetic process [GO:0009693]; fruit ripening [GO:0009835]
XLOC_042170	utg7646.4	utg7646|GWHAAAA00026732:12055-13828	CP_TkMS3	1.83572	15.1709	3.04689	5.09178	0.0002	0.0493118	yes	KVH96757.1	Heavy metal-associated domain, HMA [Cynara cardunculus var. scolymus]	Q9LZF1	Heavy metal-associated isoprenylated plant protein 6 (AtHIP06) (Cadmium induced protein CdI19)	GO:0005737; GO:0005886; GO:0030001; GO:0046914; GO:0046916	cytoplasm [GO:0005737]; plasma membrane [GO:0005886]; transition metal ion binding [GO:0046914]; cellular transition metal ion homeostasis [GO:0046916]; metal ion transport [GO:0030001]
XLOC_042503	utg7768.14	utg7768|GWHAAAA00017992:50845-51965	CP_TkMS3	169.689	8.9219	-4.2494	-9.67566	5e-05	0.0188382	yes	KVH89542.1	hypothetical protein Ccrd_008468 [Cynara cardunculus var. scolymus]	B9DGG8	Dormancy-associated protein 1 (AtDRM1) (Dormancy-associated protein-like 1) (AtDYL1)	GO:0007275; GO:0009744; GO:0009749; GO:0009750	multicellular organism development [GO:0007275]; response to fructose [GO:0009750]; response to glucose [GO:0009749]; response to sucrose [GO:0009744]
XLOC_042672	utg7849.1	utg7849|GWHAAAA00003973:13727-18226	CP_TkMS3	0	0.348501	Inf	NA	0.00015	0.0422672	yes	XP_022016142.1	uncharacterized protein LOC110915715 [Helianthus annuus]	Q6BLU6	Decapping nuclease RAI1 (EC 3.6.1.-)	GO:0000166; GO:0000448; GO:0003723; GO:0005634; GO:0005829; GO:0006355; GO:0006397; GO:0030234; GO:0030846; GO:0031087; GO:0034353; GO:0046872; GO:0071035; GO:1990174	cytosol [GO:0005829]; nucleus [GO:0005634]; enzyme regulator activity [GO:0030234]; metal ion binding [GO:0046872]; nucleotide binding [GO:0000166]; phosphodiesterase decapping endonuclease activity [GO:1990174]; RNA binding [GO:0003723]; RNA pyrophosphohydrolase activity [GO:0034353]; cleavage in ITS2 between 5.8S rRNA and LSU-rRNA of tricistronic rRNA transcript (SSU-rRNA, 5.8S rRNA, LSU-rRNA) …
XLOC_042711	utg7863.6	utg7863|GWHAAAA00012466:36096-38285	CP_TkMS3	37.4642	312.601	3.06074	5.08127	0.0001	0.0322423	yes	XP_021990010.1	ribulose bisphosphate carboxylase/oxygenase activase, chloroplastic-like [Helianthus annuus]	Q40281	Ribulose bisphosphate carboxylase/oxygenase activase, chloroplastic (RA) (RuBisCO activase)	GO:0005524; GO:0009570	chloroplast stroma [GO:0009570]; ATP binding [GO:0005524]
XLOC_042753	utg7873.9	utg7873|GWHAAAA00011980:42271-47227	CP_TkMS3	2.61091	13.8228	2.40443	3.93945	0.00015	0.0422672	yes	XP_022039704.1	two-pore potassium channel 1-like [Helianthus annuus]	Q8LBL1	Two-pore potassium channel 1 (AtTPK1) (Calcium-activated outward-rectifying potassium channel 1) (AtKCO1)	GO:0005216; GO:0005774; GO:0005887; GO:0009705; GO:0010029; GO:0010119; GO:0022841; GO:0030007; GO:0030322; GO:0046872; GO:0051260	integral component of plasma membrane [GO:0005887]; plant-type vacuole membrane [GO:0009705]; vacuolar membrane [GO:0005774]; ion channel activity [GO:0005216]; metal ion binding [GO:0046872]; potassium ion leak channel activity [GO:0022841]; cellular potassium ion homeostasis [GO:0030007]; protein homooligomerization [GO:0051260]; regulation of seed germination [GO:0010029]; regulation of stomat…
XLOC_043115	utg8039.1	utg8039|GWHAAAA00001170:8736-11147	CP_TkMS3	0	6.07942	Inf	NA	5e-05	0.0188382	yes	KVH90712.1	Fatty acyl-CoA reductase [Cynara cardunculus var. scolymus]	Q93ZB9	Fatty acyl-CoA reductase 3 (EC 1.2.1.84) (Protein ECERIFERUM 4)	GO:0005783; GO:0006629; GO:0010025; GO:0010345; GO:0035336; GO:0080019; GO:0102965	endoplasmic reticulum [GO:0005783]; alcohol-forming fatty acyl-CoA reductase activity [GO:0102965]; fatty-acyl-CoA reductase (alcohol-forming) activity [GO:0080019]; lipid metabolic process [GO:0006629]; long-chain fatty-acyl-CoA metabolic process [GO:0035336]; suberin biosynthetic process [GO:0010345]; wax biosynthetic process [GO:0010025]
XLOC_043443	utg8177.10	utg8177|GWHAAAA00011409:45852-46729	CP_TkMS3	0	4.03852	Inf	NA	0.0002	0.0493118	yes	OMO59699.1	Transposon, En/Spm-like protein [Corchorus capsularis]	Q8IYL2	Probable tRNA (uracil-O(2)-)-methyltransferase (EC 2.1.1.211) (Methyltransferase-like protein 19)	GO:0005737; GO:0016300; GO:0030488; GO:0046872	cytoplasm [GO:0005737]; metal ion binding [GO:0046872]; tRNA (uracil) methyltransferase activity [GO:0016300]; tRNA methylation [GO:0030488]
XLOC_043493	utg8190.13	utg8190|GWHAAAA00019845:64770-66693	CP_TkMS3	3.40881	41.6764	3.61189	6.44869	5e-05	0.0188382	yes	XP_023772179.1	tubulin beta chain-like [Lactuca sativa]	P18025	Tubulin beta-1 chain (Beta-1-tubulin)	GO:0003924; GO:0005200; GO:0005525; GO:0005737; GO:0005874; GO:0007017	cytoplasm [GO:0005737]; microtubule [GO:0005874]; GTP binding [GO:0005525]; GTPase activity [GO:0003924]; structural constituent of cytoskeleton [GO:0005200]; microtubule-based process [GO:0007017]
XLOC_044501	-	utg8659|GWHAAAA00009151:26904-27734	CP_TkMS3	0	1.36997	Inf	NA	0.00015	0.0422672	yes	.	.	.	.	.	.
XLOC_044606	utg8695.8	utg8695|GWHAAAA00006650:58092-69208	CP_TkMS3	13.575	70.034	2.36711	4.53438	0.00015	0.0422672	yes	XP_021973155.1	aquaporin PIP2-4-like [Helianthus annuus]	Q9FF53	Probable aquaporin PIP2-4 (Plasma membrane intrinsic protein 2.4) (AtPIP2;4) [Cleaved into: Probable aquaporin PIP2-4, N-terminally processed]	GO:0005887; GO:0009506; GO:0009737; GO:0015250; GO:0034220; GO:0048767; GO:0080170	integral component of plasma membrane [GO:0005887]; plasmodesma [GO:0009506]; water channel activity [GO:0015250]; hydrogen peroxide transmembrane transport [GO:0080170]; ion transmembrane transport [GO:0034220]; response to abscisic acid [GO:0009737]; root hair elongation [GO:0048767]
XLOC_044606	utg8695.9	utg8695|GWHAAAA00006650:58092-69208	CP_TkMS3	13.575	70.034	2.36711	4.53438	0.00015	0.0422672	yes	XP_021973155.1	aquaporin PIP2-4-like [Helianthus annuus]	Q9FF53	Probable aquaporin PIP2-4 (Plasma membrane intrinsic protein 2.4) (AtPIP2;4) [Cleaved into: Probable aquaporin PIP2-4, N-terminally processed]	GO:0005887; GO:0009506; GO:0009737; GO:0015250; GO:0034220; GO:0048767; GO:0080170	integral component of plasma membrane [GO:0005887]; plasmodesma [GO:0009506]; water channel activity [GO:0015250]; hydrogen peroxide transmembrane transport [GO:0080170]; ion transmembrane transport [GO:0034220]; response to abscisic acid [GO:0009737]; root hair elongation [GO:0048767]
XLOC_044781	utg8777.13	utg8777|GWHAAAA00020722:84156-86370	CP_TkMS3	138.023	17.7194	-2.9615	-6.02458	5e-05	0.0188382	yes	KVI02750.1	Helix-turn-helix motif-containing protein [Cynara cardunculus var. scolymus]	O23208	Homeobox-leucine zipper protein ATHB-40 (HD-ZIP protein ATHB-40) (Homeodomain transcription factor ATHB-40)	GO:0003700; GO:0005634; GO:0006351; GO:0009733; GO:0043565	nucleus [GO:0005634]; DNA binding transcription factor activity [GO:0003700]; sequence-specific DNA binding [GO:0043565]; response to auxin [GO:0009733]; transcription, DNA-templated [GO:0006351]
XLOC_045200	utg896.5	utg896|GWHAAAA00020869:24702-26608	CP_TkMS3	8.41388	67.2882	2.99951	5.66923	5e-05	0.0188382	yes	XP_021974115.1	probable protein phosphatase 2C 25 [Helianthus annuus]	O80871	Probable protein phosphatase 2C 25 (AtPP2C25) (EC 3.1.3.16) (Protein phosphatase AP2C1)	GO:0004722; GO:0005634; GO:0009536; GO:0009611; GO:0009620; GO:0009738; GO:0046872; GO:0050832	nucleus [GO:0005634]; plastid [GO:0009536]; metal ion binding [GO:0046872]; protein serine/threonine phosphatase activity [GO:0004722]; abscisic acid-activated signaling pathway [GO:0009738]; defense response to fungus [GO:0050832]; response to fungus [GO:0009620]; response to wounding [GO:0009611]
XLOC_045484	utg9069.19	utg9069|GWHAAAA00011772:107529-109806	CP_TkMS3	3.10922	26.6255	3.09818	5.4496	5e-05	0.0188382	yes	XP_021998099.1	putative calcium-binding protein CML23 [Helianthus annuus]	Q8RYK0	Probable calcium-binding protein CML31 (Calmodulin-like protein 31)	GO:0005509	calcium ion binding [GO:0005509]
XLOC_045560	utg90.8	utg90|GWHAAAA00006691:35145-40619	CP_TkMS3	10.0671	128.535	3.67444	6.83382	5e-05	0.0188382	yes	XP_009758028.1	PREDICTED: GDSL esterase/lipase 6 [Nicotiana sylvestris]	Q9C996	GDSL esterase/lipase 6 (EC 3.1.1.-) (Extracellular lipase 6)	GO:0005576; GO:0016042; GO:0016298	extracellular region [GO:0005576]; lipase activity [GO:0016298]; lipid catabolic process [GO:0016042]
XLOC_045596	-	utg9113|GWHAAAA00008811:69071-70219	CP_TkMS3	0	1.45701	Inf	NA	5e-05	0.0188382	yes	.	.	.	.	.	.
XLOC_045888	utg9249.2	utg9249|GWHAAAA00000419:8516-9684	CP_TkMS3	8.24866	54.8118	2.73226	5.62257	0.0001	0.0322423	yes	KVH93346.1	Glutathione S-transferase/chloride channel, C-terminal [Cynara cardunculus var. scolymus]	Q03666	Probable glutathione S-transferase (EC 2.5.1.18) (Auxin-induced protein PCNT107)	GO:0004364; GO:0009734	glutathione transferase activity [GO:0004364]; auxin-activated signaling pathway [GO:0009734]
XLOC_046897	utg981.25	utg981|GWHAAAA00006123:119753-121849	CP_TkMS3	0	0.586776	Inf	NA	0.0001	0.0322423	yes	KVI06332.1	Poly(ADP-ribose) polymerase, catalytic domain-containing protein [Cynara cardunculus var. scolymus]	Q9FJJ3	Probable inactive poly [ADP-ribose] polymerase SRO5 (Protein SIMILAR TO RCD ONE 5)	GO:0003950; GO:0005739; GO:0007275; GO:0009651; GO:0016363; GO:0072593	mitochondrion [GO:0005739]; nuclear matrix [GO:0016363]; NAD+ ADP-ribosyltransferase activity [GO:0003950]; multicellular organism development [GO:0007275]; reactive oxygen species metabolic process [GO:0072593]; response to salt stress [GO:0009651]
XLOC_046933	utg9847.7	utg9847|GWHAAAA00000883:56005-59268	CP_TkMS3	9.95437	128.151	3.68637	6.5404	5e-05	0.0188382	yes	XP_022015802.1	fructose-bisphosphate aldolase 1, chloroplastic-like [Helianthus annuus]	Q944G9	Fructose-bisphosphate aldolase 2, chloroplastic (AtFBA2) (EC 4.1.2.13)	GO:0004332; GO:0006094; GO:0006096; GO:0009507; GO:0009570; GO:0009579; GO:0009737; GO:0009941; GO:0010287; GO:0016020; GO:0046686; GO:0048046	apoplast [GO:0048046]; chloroplast [GO:0009507]; chloroplast envelope [GO:0009941]; chloroplast stroma [GO:0009570]; membrane [GO:0016020]; plastoglobule [GO:0010287]; thylakoid [GO:0009579]; fructose-bisphosphate aldolase activity [GO:0004332]; gluconeogenesis [GO:0006094]; glycolytic process [GO:0006096]; response to abscisic acid [GO:0009737]; response to cadmium ion [GO:0046686]
XLOC_047041	utg9900.15	utg9900|GWHAAAA00026354:81296-83109	CP_TkMS3	3.70933	26.78	2.85193	5.20873	0.0002	0.0493118	yes	XP_023740352.1	probable xyloglucan endotransglucosylase/hydrolase protein 33 [Lactuca sativa]	Q8LC45	Probable xyloglucan endotransglucosylase/hydrolase protein 33 (At-XTH33) (XTH-33) (EC 2.4.1.207)	GO:0004553; GO:0005618; GO:0005887; GO:0009831; GO:0010411; GO:0016762; GO:0042546; GO:0048046	apoplast [GO:0048046]; cell wall [GO:0005618]; integral component of plasma membrane [GO:0005887]; hydrolase activity, hydrolyzing O-glycosyl compounds [GO:0004553]; xyloglucan:xyloglucosyl transferase activity [GO:0016762]; cell wall biogenesis [GO:0042546]; plant-type cell wall modification involved in multidimensional cell growth [GO:0009831]; xyloglucan metabolic process [GO:0010411]

## Sheet: Table_S4
Supplementary Table 4: DEGs in CP T2 vs. T0
XLOC_id	gene	locus	sample	value_T2	value_T0	log2(fold_change)	test_stat	p_value	FDR_p-value_correction	significant	Homology based description (NCBI_Entry_ID)	Homology based description NCBI (Protein names)	Homology based description (Uniprot_Entry_ID)	Homology based description UniProt (Protein names)	Gene ontology IDs	Gene ontology (GO)
XLOC_000285	utg10129.1	utg10129|GWHAAAA00001938:3636-9243	CP_TkMS2	41.7284	2.89469	-3.84955	-4.25736	0.00015	0.0327643	yes	XP_021988350.1	phospholipase D zeta 1-like [Helianthus annuus]	Q9M9W8	Phospholipase D zeta 2 (PLDzeta2) (EC 3.1.4.4) (Phospholipase D p2) (AtPLDp2) (Phospholipase D2 PHOX and PX-containing domain protein)	GO:0004630; GO:0005773; GO:0006654; GO:0006995; GO:0008610; GO:0009395; GO:0009733; GO:0016036; GO:0019375; GO:0035091; GO:0048017; GO:0048364; GO:0060627; GO:0070290	vacuole [GO:0005773]; N-acylphosphatidylethanolamine-specific phospholipase D activity [GO:0070290]; phosphatidylinositol binding [GO:0035091]; phospholipase D activity [GO:0004630]; cellular response to nitrogen starvation [GO:0006995]; cellular response to phosphate starvation [GO:0016036]; galactolipid biosynthetic process [GO:0019375]; inositol lipid-mediated signaling [GO:0048017]; lipid bio…
XLOC_000667	utg10326.1	utg10326|GWHAAAA00018059:470-1749	CP_TkMS2	2.44669	0	-Inf	NA	0.0002	0.0360882	yes	KVH88501.1	Oxoglutarate/iron-dependent dioxygenase [Cynara cardunculus var. scolymus]	Q9SIE0	DNA oxidative demethylase ALKBH2 (EC 1.14.11.33) (Alkylated DNA repair protein alkB homolog 2) (Alpha-ketoglutarate-dependent dioxygenase alkB homolog 2)	GO:0005634; GO:0006281; GO:0035514; GO:0046872; GO:0103053	nucleus [GO:0005634]; 1-ethyladenine demethylase activity [GO:0103053]; DNA demethylase activity [GO:0035514]; metal ion binding [GO:0046872]; DNA repair [GO:0006281]
XLOC_000729	utg10362.10	utg10362|GWHAAAA00031009:27459-28669	CP_TkMS2	4.11702	0	-Inf	NA	5e-05	0.0151307	yes	OTG20344.1	putative protein of unknown function DUF241, plant [Helianthus annuus]	O49680	Pentatricopeptide repeat-containing protein At4g19220, mitochondrial	GO:0003723; GO:0004519; GO:0005739; GO:0009451; GO:0009507; GO:0031425	chloroplast [GO:0009507]; mitochondrion [GO:0005739]; endonuclease activity [GO:0004519]; RNA binding [GO:0003723]; chloroplast RNA processing [GO:0031425]; RNA modification [GO:0009451]
XLOC_000982	utg10479.26	utg10479|GWHAAAA00008679:163453-165642	CP_TkMS2	2.05855	0	-Inf	NA	0.0002	0.0360882	yes	KVH85900.1	Lipase, GDSL [Cynara cardunculus var. scolymus]	Q9C7N5	GDSL esterase/lipase At1g29660 (EC 3.1.1.-) (Apoplastic EDS1-dependent protein 3) (Extracellular lipase At1g29660)	GO:0005634; GO:0009627; GO:0016042; GO:0016788; GO:0048046	apoplast [GO:0048046]; nucleus [GO:0005634]; hydrolase activity, acting on ester bonds [GO:0016788]; lipid catabolic process [GO:0016042]; systemic acquired resistance [GO:0009627]
XLOC_001319	utg10656.10	utg10656|GWHAAAA00026424:45234-46970	CP_TkMS2	142.964	2.39805	-5.89765	-7.01681	0.0002	0.0360882	yes	XP_021972311.1	NAC domain-containing protein 67-like [Helianthus annuus]	Q52QH4	NAC domain-containing protein 68 (ONAC068) (OsNAC4)	GO:0003677; GO:0005634; GO:0006351; GO:0006355	nucleus [GO:0005634]; DNA binding [GO:0003677]; regulation of transcription, DNA-templated [GO:0006355]; transcription, DNA-templated [GO:0006351]
XLOC_001458	utg10727.3	utg10727|GWHAAAA00011989:21730-23649	CP_TkMS2	424.578	19.8402	-4.41953	-5.0274	0.0002	0.0360882	yes	KVH92521.1	Protein kinase, ATP binding site-containing protein [Cynara cardunculus var. scolymus]	O80888	Mitogen-activated protein kinase kinase kinase 17 (EC 2.7.11.25)	GO:0004674; GO:0004702; GO:0004709; GO:0005524; GO:0005634; GO:0005737; GO:0006970; GO:0007346; GO:0009737; GO:0009738; GO:0023014; GO:0031098; GO:0032147	cytoplasm [GO:0005737]; nucleus [GO:0005634]; ATP binding [GO:0005524]; MAP kinase kinase kinase activity [GO:0004709]; protein serine/threonine kinase activity [GO:0004674]; signal transducer, downstream of receptor, with serine/threonine kinase activity [GO:0004702]; abscisic acid-activated signaling pathway [GO:0009738]; activation of protein kinase activity [GO:0032147]; regulation of mitotic…
XLOC_001787	utg10897.10	utg10897|GWHAAAA00000886:38623-39294	CP_TkMS2	11.7755	0	-Inf	NA	5e-05	0.0151307	yes	XP_022004868.1	auxin-responsive protein SAUR50-like [Helianthus annuus]	O65695	Auxin-responsive protein SAUR50 (Protein SMALL AUXIN UP RNA 50)	GO:0009734; GO:0040008	auxin-activated signaling pathway [GO:0009734]; regulation of growth [GO:0040008]
XLOC_001808	utg10902.20	utg10902|GWHAAAA00000551:93754-98985	CP_TkMS2	11.738	0.504536	-4.54008	-4.54396	0.00025	0.0442851	yes	KVF53876.1	hypothetical protein Ccrd_026749 [Cynara cardunculus var. scolymus]	Q84JC2	Protein DOG1-like 4	GO:0006351; GO:0043565	sequence-specific DNA binding [GO:0043565]; transcription, DNA-templated [GO:0006351]
XLOC_001986	-	utg11016|GWHAAAA00012656:14694-16006	CP_TkMS2	646.47	18.2849	-5.14386	-6.28519	0.0001	0.025044	yes	.	.	.	.	.	.
XLOC_002020	utg11043.10	utg11043|GWHAAAA00001387:51142-67741	CP_TkMS2	15.5857	0.989837	-3.97689	-3.9948	5e-05	0.0151307	yes	XP_021982724.1	MORC family CW-type zinc finger protein 3-like [Helianthus annuus]	Q8BMD7	MORC family CW-type zinc finger protein 4 (Zinc finger CW-type coiled-coil domain protein 2)	GO:0005654; GO:0008270	nucleoplasm [GO:0005654]; zinc ion binding [GO:0008270]
XLOC_002021	-	utg11043|GWHAAAA00001387:25147-27568	CP_TkMS2	3.45693	0	-Inf	NA	5e-05	0.0151307	yes	.	.	.	.	.	.
XLOC_002042	utg1104.11	utg1104|GWHAAAA00007463:65405-66202	CP_TkMS2	6.8018	0	-Inf	NA	5e-05	0.0151307	yes	XP_021995040.1	vesicle-associated protein 1-4-like [Helianthus annuus]	Q9SSN3	Toll/interleukin-1 receptor-like protein (AtTIR)	GO:0005737; GO:0006952; GO:0007165; GO:0009506	cytoplasm [GO:0005737]; plasmodesma [GO:0009506]; defense response [GO:0006952]; signal transduction [GO:0007165]
XLOC_002053	utg11051.7	utg11051|GWHAAAA00010471:38955-40253	CP_TkMS2	4.9412	0	-Inf	NA	0.0001	0.025044	yes	XP_021972634.1	probable carboxylesterase 17 [Helianthus annuus]	Q9LFR7	Probable carboxylesterase 17 (AtCXE17) (EC 3.1.1.1)	GO:0009056; GO:0016787; GO:0052689	carboxylic ester hydrolase activity [GO:0052689]; hydrolase activity [GO:0016787]; catabolic process [GO:0009056]
XLOC_002102	utg11083.5	utg11083|GWHAAAA00008176:32660-34014	CP_TkMS2	12.4884	0	-Inf	NA	5e-05	0.0151307	yes	OTF96988.1	putative RING/U-box superfamily protein [Helianthus annuus]	Q8L9W3	E3 ubiquitin-protein ligase ATL23 (EC 2.3.2.27) (RING-H2 finger protein ATL23) (RING-type E3 ubiquitin transferase ATL23)	GO:0004842; GO:0016021; GO:0016567; GO:0043161; GO:0046872; GO:0061630	integral component of membrane [GO:0016021]; metal ion binding [GO:0046872]; ubiquitin protein ligase activity [GO:0061630]; ubiquitin-protein transferase activity [GO:0004842]; proteasome-mediated ubiquitin-dependent protein catabolic process [GO:0043161]; protein ubiquitination [GO:0016567]
XLOC_002316	-	utg11203|GWHAAAA00029737:12812-14799	CP_TkMS2	1.97789	0	-Inf	NA	5e-05	0.0151307	yes	.	.	.	.	.	.
XLOC_002865	utg11494.4	utg11494|GWHAAAA00029945:11765-13649	CP_TkMS2	3.0644	0	-Inf	NA	5e-05	0.0151307	yes	KVI00129.1	Alpha carbonic anhydrase [Cynara cardunculus var. scolymus]	Q8L817	Alpha carbonic anhydrase 7 (AtaCA7) (AtalphaCA7) (EC 4.2.1.1) (Alpha carbonate dehydratase 7)	GO:0004089; GO:0006730; GO:0008270; GO:0009570	chloroplast stroma [GO:0009570]; carbonate dehydratase activity [GO:0004089]; zinc ion binding [GO:0008270]; one-carbon metabolic process [GO:0006730]
XLOC_002930	utg11538.11	utg11538|GWHAAAA00017942:45129-45457	CP_TkMS2	19.8266	0	-Inf	NA	0.0002	0.0360882	yes	KVI08367.1	Amidohydrolase [Cynara cardunculus var. scolymus]	P54968	IAA-amino acid hydrolase ILR1 (EC 3.5.1.-)	GO:0005783; GO:0009850; GO:0010210; GO:0010211; GO:0046872	endoplasmic reticulum [GO:0005783]; IAA-Leu conjugate hydrolase activity [GO:0010211]; IAA-Phe conjugate hydrolase activity [GO:0010210]; metal ion binding [GO:0046872]; auxin metabolic process [GO:0009850]
XLOC_003004	utg1157.19	utg1157|GWHAAAA00004085:77976-79600	CP_TkMS2	1.96409	0	-Inf	NA	0.0001	0.025044	yes	XP_021999654.1	B3 domain-containing protein Os03g0212300-like [Helianthus annuus]	Q8L3W1	B3 domain-containing transcription factor VRN1 (Protein VERNALIZATION 1)	GO:0003677; GO:0005654; GO:0006351; GO:0006355; GO:0009909; GO:0010048; GO:0043565	nucleoplasm [GO:0005654]; DNA binding [GO:0003677]; sequence-specific DNA binding [GO:0043565]; regulation of flower development [GO:0009909]; regulation of transcription, DNA-templated [GO:0006355]; transcription, DNA-templated [GO:0006351]; vernalization response [GO:0010048]
XLOC_004210	utg12213.14	utg12213|GWHAAAA00025075:51528-52448	CP_TkMS2	304.907	9.78774	-4.96125	-7.1547	0.0001	0.025044	yes	OTG16845.1	putative protein of unknown function DUF761, plant [Helianthus annuus]	Q4ICI6	Survival factor 1	GO:0005634; GO:0005737; GO:0006979	cytoplasm [GO:0005737]; nucleus [GO:0005634]; response to oxidative stress [GO:0006979]
XLOC_004350	utg1232.18	utg1232|GWHAAAA00008793:124970-128833	CP_TkMS2	1.21455	0	-Inf	NA	0.0002	0.0360882	yes	Q8LSC3.1	RecName: Full=Germacrene A synthase long form; Short=CiGASlo	Q8LSC3	Germacrene A synthase long form (CiGASlo) (EC 4.2.3.23)	GO:0000287; GO:0016114; GO:0034005; GO:0045338	germacrene-A synthase activity [GO:0034005]; magnesium ion binding [GO:0000287]; farnesyl diphosphate metabolic process [GO:0045338]; terpenoid biosynthetic process [GO:0016114]
XLOC_004640	-	utg12503|GWHAAAA00007050:33370-36713	CP_TkMS2	4.30559	0	-Inf	NA	5e-05	0.0151307	yes	.	.	.	.	.	.
XLOC_004642	-	utg12503|GWHAAAA00007050:33370-36713	CP_TkMS2	3.5756	0	-Inf	NA	5e-05	0.0151307	yes	.	.	.	.	.	.
XLOC_005107	-	utg12802|GWHAAAA00007843:115811-116997	CP_TkMS2	2.08907	0	-Inf	NA	0.0002	0.0360882	yes	.	.	.	.	.	.
XLOC_006191	utg13376.4	utg13376|GWHAAAA00029790:18060-22152	CP_TkMS2	1.96272	0	-Inf	NA	0.00015	0.0327643	yes	XP_021969609.1	probable glycerol-3-phosphate acyltransferase 8 [Helianthus annuus]	Q5XF03	Probable glycerol-3-phosphate acyltransferase 8 (EC 2.3.1.15)	GO:0004366; GO:0005783; GO:0010143; GO:0016020; GO:0016021; GO:0016024; GO:0016791; GO:0090447; GO:0102420	endoplasmic reticulum [GO:0005783]; integral component of membrane [GO:0016021]; membrane [GO:0016020]; glycerol-3-phosphate 2-O-acyltransferase activity [GO:0090447]; glycerol-3-phosphate O-acyltransferase activity [GO:0004366]; phosphatase activity [GO:0016791]; sn-1-glycerol-3-phosphate C16:0-DCA-CoA acyl transferase activity [GO:0102420]; CDP-diacylglycerol biosynthetic process [GO:0016024]; …
XLOC_006196	utg13383.9	utg13383|GWHAAAA00010342:48052-48760	CP_TkMS2	8.19756	0	-Inf	NA	5e-05	0.0151307	yes	KVE54953.1	hypothetical protein Ccrd_023946 [Cynara cardunculus var. scolymus]	Q9SW07	Protein GLUTAMINE DUMPER 2	GO:0006865; GO:0016021; GO:0080143	integral component of membrane [GO:0016021]; amino acid transport [GO:0006865]; regulation of amino acid export [GO:0080143]
XLOC_006541	utg13581.11	utg13581|GWHAAAA00016807:42551-44131	CP_TkMS2	1.90813	0	-Inf	NA	0.0002	0.0360882	yes	XP_022009986.1	kinesin-like protein KIN-14R [Helianthus annuus]	F4IJK6	Kinesin-like protein KIN-14R	GO:0003777; GO:0005524; GO:0005871; GO:0005874; GO:0007018; GO:0008017; GO:0016887	kinesin complex [GO:0005871]; microtubule [GO:0005874]; ATP binding [GO:0005524]; ATPase activity [GO:0016887]; microtubule binding [GO:0008017]; microtubule motor activity [GO:0003777]; microtubule-based movement [GO:0007018]
XLOC_006642	-	utg13621|GWHAAAA00030584:11207-11464	CP_TkMS2	68.427	0	-Inf	NA	5e-05	0.0151307	yes	.	.	.	.	.	.
XLOC_007200	utg13987.4	utg13987|GWHAAAA00019538:3718-4458	CP_TkMS2	3.7119	0	-Inf	NA	0.0003	0.0473658	yes	XP_021975700.1	cytochrome P450 94A1-like [Helianthus annuus]	O81117	Cytochrome P450 94A1 (EC 1.14.-.-) (P450-dependent fatty acid omega-hydroxylase)	GO:0004497; GO:0005506; GO:0005789; GO:0016021; GO:0016705; GO:0020037	endoplasmic reticulum membrane [GO:0005789]; integral component of membrane [GO:0016021]; heme binding [GO:0020037]; iron ion binding [GO:0005506]; monooxygenase activity [GO:0004497]; oxidoreductase activity, acting on paired donors, with incorporation or reduction of molecular oxygen [GO:0016705]
XLOC_007895	utg14388.11	utg14388|GWHAAAA00004858:61217-63076	CP_TkMS2	1.71717	0	-Inf	NA	0.0001	0.025044	yes	XP_022025528.1	aldo-keto reductase family 4 member C10-like [Helianthus annuus]	Q0PGJ6	NADPH-dependent aldo-keto reductase, chloroplastic (AtChlAKR) (EC 1.1.1.-) (Aldo-keto reductase family 4 member C9)	GO:0004033; GO:0008106; GO:0009409; GO:0009414; GO:0009507; GO:0009636; GO:0009651; GO:0016229; GO:0055114; GO:0070401	chloroplast [GO:0009507]; alcohol dehydrogenase (NADP+) activity [GO:0008106]; aldo-keto reductase (NADP) activity [GO:0004033]; NADP+ binding [GO:0070401]; steroid dehydrogenase activity [GO:0016229]; oxidation-reduction process [GO:0055114]; response to cold [GO:0009409]; response to salt stress [GO:0009651]; response to toxic substance [GO:0009636]; response to water deprivation [GO:0009414]
XLOC_007899	utg14388.24	utg14388|GWHAAAA00004858:108358-109940	CP_TkMS2	234.105	4.92958	-5.56955	-6.79082	5e-05	0.0151307	yes	KVH95587.1	Ribonuclease CAF1 [Cynara cardunculus var. scolymus]	Q9FMS6	Probable CCR4-associated factor 1 homolog 11 (EC 3.1.13.4)	GO:0000289; GO:0000932; GO:0003723; GO:0004535; GO:0005634; GO:0006351; GO:0006355; GO:0008408; GO:0017148; GO:0030015; GO:0042742; GO:0043928; GO:0046872	CCR4-NOT core complex [GO:0030015]; nucleus [GO:0005634]; P-body [GO:0000932]; 3'-5' exonuclease activity [GO:0008408]; metal ion binding [GO:0046872]; poly(A)-specific ribonuclease activity [GO:0004535]; RNA binding [GO:0003723]; defense response to bacterium [GO:0042742]; exonucleolytic nuclear-transcribed mRNA catabolic process involved in deadenylation-dependent decay [GO:0043928]; negative r…
XLOC_008050	utg1445.14	utg1445|GWHAAAA00004647:74095-74467	CP_TkMS2	24.1556	0	-Inf	NA	5e-05	0.0151307	yes	KVH89290.1	hypothetical protein Ccrd_008723 [Cynara cardunculus var. scolymus]	Q9LJD9	Arabinogalactan peptide 12 (AG-peptide 12)	GO:0005886; GO:0031225	anchored component of membrane [GO:0031225]; plasma membrane [GO:0005886]
XLOC_008066	utg14473.12	utg14473|GWHAAAA00028827:41276-43161	CP_TkMS2	2.02565	0	-Inf	NA	5e-05	0.0151307	yes	XP_022034230.1	non-specific lipid-transfer protein AP10-like [Helianthus annuus]	P82007	Non-specific lipid-transfer protein AP10 (Ha-AP10) (LTP) (NsLTP)	GO:0005615; GO:0006869; GO:0008289; GO:0016020; GO:0031640; GO:0050832	extracellular space [GO:0005615]; membrane [GO:0016020]; lipid binding [GO:0008289]; defense response to fungus [GO:0050832]; killing of cells of other organism [GO:0031640]; lipid transport [GO:0006869]
XLOC_008114	utg14505.4	utg14505|GWHAAAA00007276:27932-29748	CP_TkMS2	3.80794	0	-Inf	NA	5e-05	0.0151307	yes	XP_021974029.1	putative two-component response regulator ARR21 isoform X2 [Helianthus annuus]	Q700D9	Putative Myb family transcription factor At1g14600	GO:0003677; GO:0003700; GO:0005634; GO:0006351; GO:0006355	nucleus [GO:0005634]; DNA binding [GO:0003677]; DNA binding transcription factor activity [GO:0003700]; regulation of transcription, DNA-templated [GO:0006355]; transcription, DNA-templated [GO:0006351]
XLOC_008223	utg14566.12	utg14566|GWHAAAA00003701:49858-51643	CP_TkMS2	17.0096	0	-Inf	NA	5e-05	0.0151307	yes	KVH50258.1	UDP-glucuronosyl/UDP-glucosyltransferase [Cynara cardunculus var. scolymus]	F8WKW1	7-deoxyloganetin glucosyltransferase (EC 2.4.1.324) (Genipin glucosyltransferase) (UDP-glucose glucosyltransferase 2) (GjUGT2) (UDP-glycosyltransferase 85A24)	GO:0008152; GO:0035251	UDP-glucosyltransferase activity [GO:0035251]; metabolic process [GO:0008152]
XLOC_008256	utg14583.16	utg14583|GWHAAAA00012062:80532-82366	CP_TkMS2	4.96635	0	-Inf	NA	5e-05	0.0151307	yes	XP_021983448.1	UDP-glycosyltransferase 85C2-like [Helianthus annuus]	Q6VAB0	UDP-glycosyltransferase 85C2 (EC 2.4.1.-)	GO:0008152; GO:0035251	UDP-glucosyltransferase activity [GO:0035251]; metabolic process [GO:0008152]
XLOC_008328	utg14629.11	utg14629|GWHAAAA00018449:56294-58543	CP_TkMS2	339.901	13.8774	-4.61431	-5.94518	5e-05	0.0151307	yes	XP_022013535.1	probable 2-oxoglutarate-dependent dioxygenase At5g05600 isoform X1 [Helianthus annuus]	Q9FFF6	Probable 2-oxoglutarate-dependent dioxygenase At5g05600 (EC 1.14.11.-)	GO:0005829; GO:0009813; GO:0046872; GO:0051213; GO:0080167; GO:0097237; GO:0120091; GO:2000022	cytosol [GO:0005829]; dioxygenase activity [GO:0051213]; jasmonic acid hydrolase [GO:0120091]; metal ion binding [GO:0046872]; cellular response to toxic substance [GO:0097237]; flavonoid biosynthetic process [GO:0009813]; regulation of jasmonic acid mediated signaling pathway [GO:2000022]; response to karrikin [GO:0080167]
XLOC_008348	utg14651.2	utg14651|GWHAAAA00007849:7978-9772	CP_TkMS2	88.6733	3.80225	-4.54358	-5.88046	0.0003	0.0473658	yes	XP_022025849.1	short-chain dehydrogenase TIC 32, chloroplastic-like [Helianthus annuus]	A2RVM0	Short-chain dehydrogenase TIC 32, chloroplastic (EC 1.1.1.-) (Translocon at the inner envelope membrane of chloroplasts 32) (AtTIC32)	GO:0005886; GO:0009507; GO:0009706; GO:0009941; GO:0015031; GO:0016491	chloroplast [GO:0009507]; chloroplast envelope [GO:0009941]; chloroplast inner membrane [GO:0009706]; plasma membrane [GO:0005886]; oxidoreductase activity [GO:0016491]; protein transport [GO:0015031]
XLOC_008676	utg14844.15	utg14844|GWHAAAA00014695:62629-65002	CP_TkMS2	8.40676	0	-Inf	NA	5e-05	0.0151307	yes	KVH97232.1	C2 calcium-dependent membrane targeting [Cynara cardunculus var. scolymus]	Q9FL59	FT-interacting protein 1	GO:0005783; GO:0005789; GO:0008565; GO:0009506; GO:0009511; GO:0009908; GO:0009911; GO:0010228; GO:0016021; GO:0016757; GO:0034613; GO:0048574	endoplasmic reticulum [GO:0005783]; endoplasmic reticulum membrane [GO:0005789]; integral component of membrane [GO:0016021]; plasmodesma [GO:0009506]; plasmodesmatal endoplasmic reticulum [GO:0009511]; protein transporter activity [GO:0008565]; transferase activity, transferring glycosyl groups [GO:0016757]; cellular protein localization [GO:0034613]; flower development [GO:0009908]; long-day ph…
XLOC_008788	utg14937.12	utg14937|GWHAAAA00009374:52925-55414	CP_TkMS2	25.9431	0	-Inf	NA	5e-05	0.0151307	yes	XP_021970943.1	pre-rRNA-processing protein TSR1 homolog [Helianthus annuus]	Q5R434	Pre-rRNA-processing protein TSR1 homolog	GO:0005730; GO:0042255	nucleolus [GO:0005730]; ribosome assembly [GO:0042255]
XLOC_009073	utg15155.2	utg15155|GWHAAAA00005686:16166-16415	CP_TkMS2	95.7587	0	-Inf	NA	5e-05	0.0151307	yes	XP_020219706.1	glutathione S-transferase T3-like [Cajanus cajan]	Q9FHE1	Glutathione S-transferase T3 (AtGSTT3) (EC 2.5.1.18) (GST class-theta member 3) (Glutathione S-transferase 10C)	GO:0004364; GO:0005634; GO:0005737; GO:0006749; GO:0009407	cytoplasm [GO:0005737]; nucleus [GO:0005634]; glutathione transferase activity [GO:0004364]; glutathione metabolic process [GO:0006749]; toxin catabolic process [GO:0009407]
XLOC_009317	utg15280.6	utg15280|GWHAAAA00007204:23639-24728	CP_TkMS2	10.4287	0	-Inf	NA	5e-05	0.0151307	yes	KVH91971.1	AP2/ERF domain-containing protein [Cynara cardunculus var. scolymus]	O80338	Ethylene-responsive transcription factor 2 (AtERF2) (Ethylene-responsive element-binding factor 2) (EREBP-2)	GO:0003677; GO:0003700; GO:0005634; GO:0006351; GO:0009864; GO:0009873; GO:0010087; GO:0010200; GO:0045893; GO:0051301	nucleus [GO:0005634]; DNA binding [GO:0003677]; DNA binding transcription factor activity [GO:0003700]; cell division [GO:0051301]; ethylene-activated signaling pathway [GO:0009873]; induced systemic resistance, jasmonic acid mediated signaling pathway [GO:0009864]; phloem or xylem histogenesis [GO:0010087]; positive regulation of transcription, DNA-templated [GO:0045893]; response to chitin [GO:…
XLOC_009551	utg15429.5	utg15429|GWHAAAA00016548:8897-17860	CP_TkMS2	46.4801	0	-Inf	NA	0.00015	0.0327643	yes	XP_003600087.1	DUF4228 domain protein [Medicago truncatula]	A8H738	tRNA pseudouridine synthase B (EC 5.4.99.25) (tRNA pseudouridine(55) synthase) (Psi55 synthase) (tRNA pseudouridylate synthase) (tRNA-uridine isomerase)	GO:0001522; GO:0003723; GO:0008033; GO:0009982	pseudouridine synthase activity [GO:0009982]; RNA binding [GO:0003723]; pseudouridine synthesis [GO:0001522]; tRNA processing [GO:0008033]
XLOC_009551	utg15429.6	utg15429|GWHAAAA00016548:8897-17860	CP_TkMS2	46.4801	0	-Inf	NA	0.00015	0.0327643	yes	XP_003600087.1	DUF4228 domain protein [Medicago truncatula]	A8H738	tRNA pseudouridine synthase B (EC 5.4.99.25) (tRNA pseudouridine(55) synthase) (Psi55 synthase) (tRNA pseudouridylate synthase) (tRNA-uridine isomerase)	GO:0001522; GO:0003723; GO:0008033; GO:0009982	pseudouridine synthase activity [GO:0009982]; RNA binding [GO:0003723]; pseudouridine synthesis [GO:0001522]; tRNA processing [GO:0008033]
XLOC_009588	utg1544.13	utg1544|GWHAAAA00007668:82926-88575	CP_TkMS2	131.124	3.31404	-5.3062	-5.93113	5e-05	0.0151307	yes	XP_022023229.1	cyclic nucleotide-gated ion channel 1-like [Helianthus annuus]	O65717	Cyclic nucleotide-gated ion channel 1 (AtCNGC1) (Cyclic nucleotide- and calmodulin-regulated ion channel 1)	GO:0005216; GO:0005516; GO:0005886; GO:0005887; GO:0030552; GO:0030553; GO:0042391	integral component of plasma membrane [GO:0005887]; plasma membrane [GO:0005886]; calmodulin binding [GO:0005516]; cAMP binding [GO:0030552]; cGMP binding [GO:0030553]; ion channel activity [GO:0005216]; regulation of membrane potential [GO:0042391]
XLOC_010163	utg1584.15	utg1584|GWHAAAA00005248:82147-82488	CP_TkMS2	0	27.5202	Inf	NA	5e-05	0.0151307	yes	KJB23701.1	hypothetical protein B456_004G110600 [Gossypium raimondii]	O65569	40S ribosomal protein S11-2	GO:0003735; GO:0006412; GO:0019843; GO:0022627	cytosolic small ribosomal subunit [GO:0022627]; rRNA binding [GO:0019843]; structural constituent of ribosome [GO:0003735]; translation [GO:0006412]
XLOC_010275	utg15904.2	utg15904|GWHAAAA00026065:7205-9357	CP_TkMS2	1.41745	0	-Inf	NA	0.00015	0.0327643	yes	KVH95650.1	Cysteine peptidase, asparagine active site-containing protein, partial [Cynara cardunculus var. scolymus]	P25803	Vignain (EC 3.4.22.-) (Bean endopeptidase) (Cysteine proteinase EP-C1)	GO:0005788; GO:0008234	endoplasmic reticulum lumen [GO:0005788]; cysteine-type peptidase activity [GO:0008234]
XLOC_011039	utg16353.2	utg16353|GWHAAAA00027218:8634-9059	CP_TkMS2	0	22.3084	Inf	NA	0.0001	0.025044	yes	XP_022006695.1	remorin-like [Helianthus annuus]	P93788	Remorin (pp34)	GO:0005886; GO:0007267; GO:0048032	plasma membrane [GO:0005886]; galacturonate binding [GO:0048032]; cell-cell signaling [GO:0007267]
XLOC_011336	utg16554.7	utg16554|GWHAAAA00024134:37150-48009	CP_TkMS2	102.839	5.1424	-4.32181	-4.09221	0.00015	0.0327643	yes	XP_021987507.1	basic 7S globulin-like [Helianthus annuus]	P13917	Basic 7S globulin (SBg7S) (Bg) [Cleaved into: Basic 7S globulin high kDa subunit; Basic 7S globulin low kDa subunit]	GO:0004190; GO:0006508; GO:0030163; GO:0042802; GO:0045735	aspartic-type endopeptidase activity [GO:0004190]; identical protein binding [GO:0042802]; nutrient reservoir activity [GO:0045735]; protein catabolic process [GO:0030163]; proteolysis [GO:0006508]
XLOC_011377	utg16574.1	utg16574|GWHAAAA00012903:6174-7131	CP_TkMS2	23.9677	0	-Inf	NA	5e-05	0.0151307	yes	XP_010709385.1	PREDICTED: harmonin-like [Meleagris gallopavo]	Q5FNL4	Phosphoribosylaminoimidazole-succinocarboxamide synthase (EC 6.3.2.6) (SAICAR synthetase)	GO:0004639; GO:0005524; GO:0006189; GO:0009236	ATP binding [GO:0005524]; phosphoribosylaminoimidazolesuccinocarboxamide synthase activity [GO:0004639]; 'de novo' IMP biosynthetic process [GO:0006189]; cobalamin biosynthetic process [GO:0009236]
XLOC_011463	utg16614.9	utg16614|GWHAAAA00001191:45783-46686	CP_TkMS2	10.0064	0	-Inf	NA	5e-05	0.0151307	yes	AFO64617.1	cytochrome P450 mono-oxygenase [Artemisia annua]	Q9LHA1	Cytochrome P450 81D11 (EC 1.14.-.-)	GO:0002213; GO:0005506; GO:0016020; GO:0016021; GO:0016709; GO:0020037; GO:0042343; GO:0044550; GO:0098542	integral component of membrane [GO:0016021]; membrane [GO:0016020]; heme binding [GO:0020037]; iron ion binding [GO:0005506]; oxidoreductase activity, acting on paired donors, with incorporation or reduction of molecular oxygen, NAD(P)H as one donor, and incorporation of one atom of oxygen [GO:0016709]; defense response to insect [GO:0002213]; defense response to other organism [GO:0098542]; indo…
XLOC_011489	utg1662.3	utg1662|GWHAAAA00000150:6877-10095	CP_TkMS2	97.602	3.30566	-4.8839	-5.18531	5e-05	0.0151307	yes	XP_021987303.1	bifunctional TH2 protein, mitochondrial-like [Helianthus annuus]	F4KFT7	Bifunctional TH2 protein, mitochondrial (THIAMINE REQUIRING 2) [Includes: Thiamine phosphate phosphatase (EC 3.1.3.100); Aminopyrimidine aminohydrolase (EC 3.5.99.2)]	GO:0005739; GO:0005829; GO:0009228; GO:0042131; GO:0050334	cytosol [GO:0005829]; mitochondrion [GO:0005739]; thiaminase activity [GO:0050334]; thiamine phosphate phosphatase activity [GO:0042131]; thiamine biosynthetic process [GO:0009228]
XLOC_011623	utg1670.23	utg1670|GWHAAAA00009065:106289-118414	CP_TkMS2	2.50446	0	-Inf	NA	0.0002	0.0360882	yes	KVI03460.1	Six-bladed beta-propeller, TolB-like protein [Cynara cardunculus var. scolymus]	Q4V3D9	Protein STRICTOSIDINE SYNTHASE-LIKE 10 (AtSSL10) (Strictosidine synthase 8) (AtSS8)	GO:0005773; GO:0005783; GO:0005886; GO:0009058; GO:0009505; GO:0009506; GO:0016020; GO:0016788	endoplasmic reticulum [GO:0005783]; membrane [GO:0016020]; plant-type cell wall [GO:0009505]; plasma membrane [GO:0005886]; plasmodesma [GO:0009506]; vacuole [GO:0005773]; hydrolase activity, acting on ester bonds [GO:0016788]; biosynthetic process [GO:0009058]
XLOC_011919	utg16903.3	utg16903|GWHAAAA00012599:24317-25615	CP_TkMS2	4.16306	0	-Inf	NA	5e-05	0.0151307	yes	XP_022000131.1	E3 ubiquitin-protein ligase ATL41-like [Helianthus annuus]	Q9SLC3	E3 ubiquitin-protein ligase ATL41 (EC 2.3.2.27) (RING-H2 finger protein ATL41) (RING-type E3 ubiquitin transferase ATL41)	GO:0004842; GO:0016021; GO:0016567; GO:0043161; GO:0046872; GO:0061630	integral component of membrane [GO:0016021]; metal ion binding [GO:0046872]; ubiquitin protein ligase activity [GO:0061630]; ubiquitin-protein transferase activity [GO:0004842]; proteasome-mediated ubiquitin-dependent protein catabolic process [GO:0043161]; protein ubiquitination [GO:0016567]
XLOC_012164	utg17100.7	utg17100|GWHAAAA00009889:22145-24198	CP_TkMS2	706.694	17.9117	-5.30211	-5.59286	0.00015	0.0327643	yes	KVH93315.1	hypothetical protein Ccrd_004635 [Cynara cardunculus var. scolymus]	V5LLZ9	Gallate 1-beta-glucosyltransferase (EC 2.4.1.136) (UDP-glucose:gallate glucosyltransferase) (Vanillate 1-beta-glucosyltransferase)	GO:0008152; GO:0047913	gallate 1-beta-glucosyltransferase activity [GO:0047913]; metabolic process [GO:0008152]
XLOC_012210	utg17132.2	utg17132|GWHAAAA00027519:19329-20816	CP_TkMS2	1.66117	0	-Inf	NA	0.0003	0.0473658	yes	KZV56452.1	ADP,ATP carrier protein, mitochondrial [Dorcoceras hygrometricum]	P25083	ADP,ATP carrier protein, mitochondrial (ADP/ATP translocase) (Adenine nucleotide translocator) (ANT)	GO:0005743; GO:0016021; GO:0022857	integral component of membrane [GO:0016021]; mitochondrial inner membrane [GO:0005743]; transmembrane transporter activity [GO:0022857]
XLOC_012658	utg1748.8	utg1748|GWHAAAA00013465:47468-50562	CP_TkMS2	226.119	11.684	-4.27448	-4.64122	0.00025	0.0442851	yes	KVH97050.1	Glucose/ribitol dehydrogenase [Cynara cardunculus var. scolymus]	Q94KL7	Secoisolariciresinol dehydrogenase (EC 1.1.1.331) (Fragment)	GO:0016491	oxidoreductase activity [GO:0016491]
XLOC_012808	utg175.5	utg175|GWHAAAA00010649:14280-18106	CP_TkMS2	190.557	8.00157	-4.57379	-4.50669	0.0002	0.0360882	yes	KVI01234.1	Zinc finger, RING/FYVE/PHD-type [Cynara cardunculus var. scolymus]	Q6GPV5	E3 ubiquitin-protein ligase RNF181 (EC 2.3.2.27) (RING finger protein 181) (RING-type E3 ubiquitin transferase RNF181)	GO:0016567; GO:0016740; GO:0046872	metal ion binding [GO:0046872]; transferase activity [GO:0016740]; protein ubiquitination [GO:0016567]
XLOC_012966	utg17705.1	utg17705|GWHAAAA00012246:68923-69786	CP_TkMS2	3.83502	0	-Inf	NA	0.0003	0.0473658	yes	KVH96476.1	Bet v I domain-containing protein [Cynara cardunculus var. scolymus]	O50001	Major allergen Pru ar 1 (allergen Pru ar 1)	GO:0006952; GO:0009607	defense response [GO:0006952]; response to biotic stimulus [GO:0009607]
XLOC_013071	utg17755.4	utg17755|GWHAAAA00009174:21860-23596	CP_TkMS2	3.51072	0	-Inf	NA	0.00015	0.0327643	yes	KVI05823.1	CO/COL/TOC1, conserved site-containing protein [Cynara cardunculus var. scolymus]	Q9LMA8	Protein TIFY 10A (Jasmonate ZIM domain-containing protein 1)	GO:0003714; GO:0005634; GO:0006351; GO:0006355; GO:0009555; GO:0009611; GO:0009753; GO:0009867; GO:0009908; GO:0031347; GO:0042742; GO:1900067; GO:1903507; GO:2000022	nucleus [GO:0005634]; transcription corepressor activity [GO:0003714]; defense response to bacterium [GO:0042742]; flower development [GO:0009908]; jasmonic acid mediated signaling pathway [GO:0009867]; negative regulation of nucleic acid-templated transcription [GO:1903507]; pollen development [GO:0009555]; regulation of cellular response to alkaline pH [GO:1900067]; regulation of defense respon…
XLOC_013151	utg1779.2	utg1779|GWHAAAA00011606:24871-28889	CP_TkMS2	0	0.929148	Inf	NA	5e-05	0.0151307	yes	CAA98176.1	RAB8E [Lotus japonicus]	Q39433	Ras-related protein RAB1BV	GO:0003924; GO:0005525; GO:0005886	plasma membrane [GO:0005886]; GTP binding [GO:0005525]; GTPase activity [GO:0003924]
XLOC_013336	utg17932.6	utg17932|GWHAAAA00016956:21265-22415	CP_TkMS2	6.3376	0	-Inf	NA	0.00015	0.0327643	yes	XP_022013540.1	uncharacterized protein LOC110912993 [Helianthus annuus]	Q9LSZ3	Vascular-related unknown protein 1	GO:0005634; GO:0005829; GO:0010089	cytosol [GO:0005829]; nucleus [GO:0005634]; xylem development [GO:0010089]
XLOC_013485	utg1804.4	utg1804|GWHAAAA00010047:22367-24430	CP_TkMS2	144.686	2.43773	-5.89125	-5.79992	0.0003	0.0473658	yes	XP_022036199.1	uncharacterized protein LOC110938033 [Helianthus annuus]	P32295	Indole-3-acetic acid-induced protein ARG7	GO:0009733	response to auxin [GO:0009733]
XLOC_013748	utg18242.11	utg18242|GWHAAAA00008127:32927-35304	CP_TkMS2	156.593	10.2082	-3.93922	-4.07197	0.0003	0.0473658	yes	KVH98322.1	hypothetical protein Ccrd_023470 [Cynara cardunculus var. scolymus]	Q9FMH8	Probable cysteine protease RD21B (EC 3.4.22.-)	GO:0004197; GO:0005615; GO:0005764; GO:0005773; GO:0005783; GO:0005829; GO:0009651; GO:0051603	cytosol [GO:0005829]; endoplasmic reticulum [GO:0005783]; extracellular space [GO:0005615]; lysosome [GO:0005764]; vacuole [GO:0005773]; cysteine-type endopeptidase activity [GO:0004197]; proteolysis involved in cellular protein catabolic process [GO:0051603]; response to salt stress [GO:0009651]
XLOC_014391	utg18708.13	utg18708|GWHAAAA00008262:73266-73596	CP_TkMS2	19.0924	0	-Inf	NA	0.0002	0.0360882	yes	XP_022000498.1	uncharacterized protein LOC110898075 isoform X1 [Helianthus annuus]	Q56XJ7	Uncharacterized protein At4g22758	NA	NA
XLOC_015551	utg1951.6	utg1951|GWHAAAA00019359:22146-23148	CP_TkMS2	3.16486	0	-Inf	NA	0.0003	0.0473658	yes	XP_022034976.1	L10-interacting MYB domain-containing protein-like [Helianthus annuus]	Q9FFJ8	L10-interacting MYB domain-containing protein	GO:0005634; GO:0006351; GO:0006355	nucleus [GO:0005634]; regulation of transcription, DNA-templated [GO:0006355]; transcription, DNA-templated [GO:0006351]
XLOC_015817	utg19727.2	utg19727|GWHAAAA00030618:2300-3037	CP_TkMS2	36.9242	0	-Inf	NA	5e-05	0.0151307	yes	XP_022027513.1	uncharacterized protein LOC110928797 [Helianthus annuus]	Q9M0M2	ABC transporter B family member 9 (ABC transporter ABCB.9) (AtABCB9) (Multidrug resistance protein 9) (P-glycoprotein 9)	GO:0005524; GO:0016021; GO:0042626	integral component of membrane [GO:0016021]; ATP binding [GO:0005524]; ATPase activity, coupled to transmembrane movement of substances [GO:0042626]
XLOC_016250	-	utg20026|GWHAAAA00015754:15112-16283	CP_TkMS2	10.6582	0	-Inf	NA	5e-05	0.0151307	yes	.	.	.	.	.	.
XLOC_016731	utg20394.6	utg20394|GWHAAAA00023298:16646-19792	CP_TkMS2	313.27	4.06355	-6.26852	-7.30336	5e-05	0.0151307	yes	XP_021997932.1	WAT1-related protein At2g39510-like [Helianthus annuus]	O80638	WAT1-related protein At2g39510	GO:0005886; GO:0015186; GO:0016021; GO:0044746; GO:0048316; GO:0080144; GO:0098712	integral component of membrane [GO:0016021]; plasma membrane [GO:0005886]; L-glutamine transmembrane transporter activity [GO:0015186]; amino acid homeostasis [GO:0080144]; amino acid transmembrane export [GO:0044746]; L-glutamate import across plasma membrane [GO:0098712]; seed development [GO:0048316]
XLOC_017128	utg20673.6	utg20673|GWHAAAA00006168:45031-45888	CP_TkMS2	6.61311	0	-Inf	NA	5e-05	0.0151307	yes	XP_022010864.1	mitogen-activated protein kinase kinase kinase 3-like [Helianthus annuus]	F4HRJ4	Mitogen-activated protein kinase kinase kinase 3 (EC 2.7.11.25) (MAP3K alpha protein kinase) (AtMAP3Kalpha)	GO:0004674; GO:0004709; GO:0005524; GO:0005737; GO:0007346; GO:0023014; GO:0031098; GO:0032147	cytoplasm [GO:0005737]; ATP binding [GO:0005524]; MAP kinase kinase kinase activity [GO:0004709]; protein serine/threonine kinase activity [GO:0004674]; activation of protein kinase activity [GO:0032147]; regulation of mitotic cell cycle [GO:0007346]; signal transduction by protein phosphorylation [GO:0023014]; stress-activated protein kinase signaling cascade [GO:0031098]
XLOC_017167	utg20697.5	utg20697|GWHAAAA00030564:33426-35728	CP_TkMS2	1.76418	0	-Inf	NA	0.0003	0.0473658	yes	XP_022022355.1	uncharacterized protein LOC110922345 [Helianthus annuus]	.	.	.	.
XLOC_017393	utg20876.1	utg20876|GWHAAAA00012784:15101-27353	CP_TkMS2	13.1311	0	-Inf	NA	5e-05	0.0151307	yes	KVI02991.1	AMP-binding, conserved site-containing protein, partial [Cynara cardunculus var. scolymus]	Q9SFW5	Probable acyl-activating enzyme 21 (EC 6.2.1.-)	GO:0006631; GO:0016874	ligase activity [GO:0016874]; fatty acid metabolic process [GO:0006631]
XLOC_017584	utg2106.9	utg2106|GWHAAAA00009410:32395-33810	CP_TkMS2	8.30428	0	-Inf	NA	5e-05	0.0151307	yes	KVI01772.1	Barwin-like endoglucanase [Cynara cardunculus var. scolymus]	Q7XT40	Expansin-B15 (Beta-expansin-15) (OsEXPB15) (OsaEXPb1.16)	GO:0005576; GO:0005618; GO:0016020; GO:0019953; GO:0071555	cell wall [GO:0005618]; extracellular region [GO:0005576]; membrane [GO:0016020]; cell wall organization [GO:0071555]; sexual reproduction [GO:0019953]
XLOC_017728	utg21179.7	utg21179|GWHAAAA00023983:29293-33579	CP_TkMS2	0.9849	0	-Inf	NA	0.0001	0.025044	yes	XP_021971333.1	acyl-CoA-binding domain-containing protein 4-like [Helianthus annuus]	Q75LJ4	Acyl-CoA-binding domain-containing protein 6 (Acyl-CoA binding protein 6) (OsACBP6)	GO:0000062; GO:0005777; GO:0008289	peroxisome [GO:0005777]; fatty-acyl-CoA binding [GO:0000062]; lipid binding [GO:0008289]
XLOC_018145	utg21555.1	utg21555|GWHAAAA00020419:1610-3440	CP_TkMS2	7.29647	0	-Inf	NA	5e-05	0.0151307	yes	XP_021970152.1	berberine bridge enzyme-like 8 [Helianthus annuus]	Q8GTB6	Tetrahydrocannabinolic acid synthase (THCAS) (EC 1.21.3.7) (Delta(1)-tetrahydrocannabinolic acid synthase) (THCA synthase)	GO:0016614; GO:0048046; GO:0050660; GO:0102778	apoplast [GO:0048046]; Delta9-tetrahydrocannabinolate synthase activity [GO:0102778]; flavin adenine dinucleotide binding [GO:0050660]; oxidoreductase activity, acting on CH-OH group of donors [GO:0016614]
XLOC_018246	utg21652.5	utg21652|GWHAAAA00030719:26814-28659	CP_TkMS2	86.9897	5.34213	-4.02536	-5.26252	0.0002	0.0360882	yes	KVH98511.1	No apical meristem (NAM) protein [Cynara cardunculus var. scolymus]	Q9FLJ2	NAC domain-containing protein 100 (ANAC100) (AtNAC5)	GO:0003677; GO:0003700; GO:0005634; GO:0006351	nucleus [GO:0005634]; DNA binding [GO:0003677]; DNA binding transcription factor activity [GO:0003700]; transcription, DNA-templated [GO:0006351]
XLOC_018632	utg21979.14	utg21979|GWHAAAA00005370:71725-72330	CP_TkMS2	7.02614	0	-Inf	NA	0.0001	0.025044	yes	OTF99533.1	putative NB-ARC [Helianthus annuus]	O81825	Probable disease resistance protein At4g27220	GO:0005524; GO:0005886; GO:0006952; GO:0007165; GO:0043531	plasma membrane [GO:0005886]; ADP binding [GO:0043531]; ATP binding [GO:0005524]; defense response [GO:0006952]; signal transduction [GO:0007165]
XLOC_019296	utg22554.7	utg22554|GWHAAAA00019878:24367-26104	CP_TkMS2	2.0223	0	-Inf	NA	5e-05	0.0151307	yes	KVI10052.1	Leucine-rich repeat-containing protein [Cynara cardunculus var. scolymus]	O22476	Protein BRASSINOSTEROID INSENSITIVE 1 (AtBRI1) (EC 2.7.10.1) (EC 2.7.11.1) (Brassinosteroid LRR receptor kinase)	GO:0001578; GO:0004672; GO:0004674; GO:0004714; GO:0005496; GO:0005524; GO:0005768; GO:0005886; GO:0009647; GO:0009729; GO:0009742; GO:0009911; GO:0010008; GO:0010224; GO:0010268; GO:0010584; GO:0016021; GO:0042802; GO:0042803; GO:0046982; GO:0048366; GO:0048657; GO:0060548; GO:1900140	endosome [GO:0005768]; endosome membrane [GO:0010008]; integral component of membrane [GO:0016021]; plasma membrane [GO:0005886]; ATP binding [GO:0005524]; identical protein binding [GO:0042802]; protein heterodimerization activity [GO:0046982]; protein homodimerization activity [GO:0042803]; protein kinase activity [GO:0004672]; protein serine/threonine kinase activity [GO:0004674]; steroid bind…
XLOC_019875	utg23021.1	utg23021|GWHAAAA00021153:13627-19451	CP_TkMS2	59.5959	2.73312	-4.44659	-4.7621	0.0001	0.025044	yes	XP_022021485.1	E3 ubiquitin-protein ligase RGLG2-like isoform X1 [Helianthus annuus]	Q9LY87	E3 ubiquitin-protein ligase RGLG2 (EC 2.3.2.27) (RING domain ligase 2)	GO:0004842; GO:0005634; GO:0005886; GO:0009690; GO:0009738; GO:0009850; GO:0046872; GO:0080148	nucleus [GO:0005634]; plasma membrane [GO:0005886]; metal ion binding [GO:0046872]; ubiquitin-protein transferase activity [GO:0004842]; abscisic acid-activated signaling pathway [GO:0009738]; auxin metabolic process [GO:0009850]; cytokinin metabolic process [GO:0009690]; negative regulation of response to water deprivation [GO:0080148]
XLOC_020212	utg23271.4	utg23271|GWHAAAA00006096:22357-23931	CP_TkMS2	439.96	10.2286	-5.42669	-6.45826	0.00015	0.0327643	yes	XP_022021809.1	epidermis-specific secreted glycoprotein EP1-like [Helianthus annuus]	Q39688	Epidermis-specific secreted glycoprotein EP1 (52/54 kDa medium protein)	GO:0005576; GO:0006833; GO:0030246	extracellular region [GO:0005576]; carbohydrate binding [GO:0030246]; water transport [GO:0006833]
XLOC_020387	utg23410.1	utg23410|GWHAAAA00007371:254-2137	CP_TkMS2	2.47881	0	-Inf	NA	5e-05	0.0151307	yes	KVH94932.1	UDP-glucuronosyl/UDP-glucosyltransferase [Cynara cardunculus var. scolymus]	Q9ZSK5	Zeatin O-glucosyltransferase (EC 2.4.1.203) (Trans-zeatin O-beta-D-glucosyltransferase)	GO:0006486; GO:0009690; GO:0009965; GO:0010015; GO:0010083; GO:0010380; GO:0045926; GO:0048316; GO:0048439; GO:0050403; GO:0050404	trans-zeatin O-beta-D-glucosyltransferase activity [GO:0050403]; zeatin O-beta-D-xylosyltransferase activity [GO:0050404]; cytokinin metabolic process [GO:0009690]; flower morphogenesis [GO:0048439]; leaf morphogenesis [GO:0009965]; negative regulation of growth [GO:0045926]; protein glycosylation [GO:0006486]; regulation of chlorophyll biosynthetic process [GO:0010380]; regulation of vegetative …
XLOC_020404	utg23422.2	utg23422|GWHAAAA00006674:8664-13381	CP_TkMS2	1.54933	0	-Inf	NA	5e-05	0.0151307	yes	KYP61696.1	Homeobox-leucine zipper protein HDG11 [Cajanus cajan]	Q9FX31	Homeobox-leucine zipper protein HDG11 (HD-ZIP protein HDG11) (Homeodomain GLABRA 2-like protein 11) (Homeodomain transcription factor HDG11) (Protein ENHANCED DROUGHT TOLERANCE 1) (Protein HOMEODOMAIN GLABROUS 11)	GO:0000976; GO:0003700; GO:0005634; GO:0006351; GO:0008289; GO:0009828; GO:0010091	nucleus [GO:0005634]; DNA binding transcription factor activity [GO:0003700]; lipid binding [GO:0008289]; transcription regulatory region sequence-specific DNA binding [GO:0000976]; plant-type cell wall loosening [GO:0009828]; transcription, DNA-templated [GO:0006351]; trichome branching [GO:0010091]
XLOC_020493	utg23503.4	utg23503|GWHAAAA00002097:27292-30756	CP_TkMS2	2.20212	0	-Inf	NA	5e-05	0.0151307	yes	XP_021982951.1	isoflavone reductase homolog A622-like [Helianthus annuus]	P52579	Isoflavone reductase homolog A622 (EC 1.3.1.-) (NtA622)	GO:0005737; GO:0016491; GO:0044550; GO:0050661	cytoplasm [GO:0005737]; NADP binding [GO:0050661]; oxidoreductase activity [GO:0016491]; secondary metabolite biosynthetic process [GO:0044550]
XLOC_020518	utg2353.2	utg2353|GWHAAAA00022469:14608-16754	CP_TkMS2	9.74184	0	-Inf	NA	5e-05	0.0151307	yes	XP_022000322.1	protein ODORANT1-like [Helianthus annuus]	Q50EX6	Protein ODORANT1 (MYB-like protein ODO1)	GO:0003677; GO:0005634; GO:0006351; GO:0006355	nucleus [GO:0005634]; DNA binding [GO:0003677]; regulation of transcription, DNA-templated [GO:0006355]; transcription, DNA-templated [GO:0006351]
XLOC_020892	utg23907.5	utg23907|GWHAAAA00006539:14099-19547	CP_TkMS2	334.953	10.8122	-4.95323	-4.56047	0.0003	0.0473658	yes	XP_021980960.1	UDP-glycosyltransferase 74G1-like [Helianthus annuus]	Q6VAA6	UDP-glycosyltransferase 74G1 (EC 2.4.1.-)	GO:0008152; GO:0035251	UDP-glucosyltransferase activity [GO:0035251]; metabolic process [GO:0008152]
XLOC_020941	-	utg23963|GWHAAAA00003153:6908-8677	CP_TkMS2	2.07188	0	-Inf	NA	5e-05	0.0151307	yes	.	.	.	.	.	.
XLOC_021014	-	utg24052|GWHAAAA00026767:8621-10035	CP_TkMS2	1.96318	0	-Inf	NA	0.0001	0.025044	yes	.	.	.	.	.	.
XLOC_021067	utg24096.6	utg24096|GWHAAAA00004271:15903-16552	CP_TkMS2	5.75115	0	-Inf	NA	0.0001	0.025044	yes	XP_022028541.1	mitogen-activated protein kinase kinase kinase 18-like [Helianthus annuus]	Q9ZVP5	Mitogen-activated protein kinase kinase kinase 18 (EC 2.7.11.25)	GO:0004672; GO:0004674; GO:0004702; GO:0004709; GO:0005524; GO:0005634; GO:0005737; GO:0006970; GO:0007346; GO:0009737; GO:0009738; GO:0009789; GO:0023014; GO:0031098; GO:0032147; GO:0046777; GO:1900057; GO:1902457; GO:2000038	cytoplasm [GO:0005737]; nucleus [GO:0005634]; ATP binding [GO:0005524]; MAP kinase kinase kinase activity [GO:0004709]; protein kinase activity [GO:0004672]; protein serine/threonine kinase activity [GO:0004674]; signal transducer, downstream of receptor, with serine/threonine kinase activity [GO:0004702]; abscisic acid-activated signaling pathway [GO:0009738]; activation of protein kinase activi…
XLOC_021214	-	utg2420|GWHAAAA00028335:11544-14600	CP_TkMS2	1.50398	0	-Inf	NA	0.00025	0.0442851	yes	.	.	.	.	.	.
XLOC_021793	-	utg24801|GWHAAAA00020327:20688-21634	CP_TkMS2	10.8828	0	-Inf	NA	5e-05	0.0151307	yes	.	.	.	.	.	.
XLOC_021805	utg24815.4	utg24815|GWHAAAA00000655:20993-22941	CP_TkMS2	201.447	4.63965	-5.44024	-5.5776	5e-05	0.0151307	yes	XP_022039681.1	7-deoxyloganetin glucosyltransferase-like [Helianthus annuus]	F8WKW1	7-deoxyloganetin glucosyltransferase (EC 2.4.1.324) (Genipin glucosyltransferase) (UDP-glucose glucosyltransferase 2) (GjUGT2) (UDP-glycosyltransferase 85A24)	GO:0008152; GO:0035251	UDP-glucosyltransferase activity [GO:0035251]; metabolic process [GO:0008152]
XLOC_021881	utg24885.10	utg24885|GWHAAAA00025937:47137-48540	CP_TkMS2	2.12996	0	-Inf	NA	0.0003	0.0473658	yes	XP_022013078.1	probable cinnamyl alcohol dehydrogenase [Helianthus annuus]	Q40976	Probable cinnamyl alcohol dehydrogenase (CAD) (EC 1.1.1.195)	GO:0008270; GO:0009809; GO:0045551; GO:0052747	cinnamyl-alcohol dehydrogenase activity [GO:0045551]; sinapyl alcohol dehydrogenase activity [GO:0052747]; zinc ion binding [GO:0008270]; lignin biosynthetic process [GO:0009809]
XLOC_021938	utg24943.4	utg24943|GWHAAAA00002940:11306-12066	CP_TkMS2	6.3443	0	-Inf	NA	5e-05	0.0151307	yes	KVI04949.1	Zinc finger, C2H2 [Cynara cardunculus var. scolymus]	Q9SLD4	Zinc finger protein ZAT11	GO:0003676; GO:0003700; GO:0005634; GO:0006351; GO:0006355; GO:0010200; GO:0046872; GO:0071289; GO:2000280	nucleus [GO:0005634]; DNA binding transcription factor activity [GO:0003700]; metal ion binding [GO:0046872]; nucleic acid binding [GO:0003676]; cellular response to nickel ion [GO:0071289]; regulation of root development [GO:2000280]; regulation of transcription, DNA-templated [GO:0006355]; response to chitin [GO:0010200]; transcription, DNA-templated [GO:0006351]
XLOC_022058	-	utg2506|GWHAAAA00012344:487-1965	CP_TkMS2	0	2.45151	Inf	NA	0.0001	0.025044	yes	.	.	.	.	.	.
XLOC_022222	utg25241.2	utg25241|GWHAAAA00030555:25575-27764	CP_TkMS2	4.15741	0	-Inf	NA	5e-05	0.0151307	yes	KVH99810.1	Concanavalin A-like lectin/glucanase, subgroup [Cynara cardunculus var. scolymus]	C0LGP4	Probable LRR receptor-like serine/threonine-protein kinase At3g47570 (EC 2.7.11.1)	GO:0004674; GO:0005524; GO:0005886; GO:0016021	integral component of membrane [GO:0016021]; plasma membrane [GO:0005886]; ATP binding [GO:0005524]; protein serine/threonine kinase activity [GO:0004674]
XLOC_022223	utg25241.3	utg25241|GWHAAAA00030555:28346-29335	CP_TkMS2	6.6758	0	-Inf	NA	5e-05	0.0151307	yes	KVH99809.1	Concanavalin A-like lectin/glucanase, subgroup, partial [Cynara cardunculus var. scolymus]	Q9SD62	Putative receptor-like protein kinase At3g47110 (EC 2.7.11.1)	GO:0004674; GO:0005524; GO:0005886; GO:0016021	integral component of membrane [GO:0016021]; plasma membrane [GO:0005886]; ATP binding [GO:0005524]; protein serine/threonine kinase activity [GO:0004674]
XLOC_022360	utg25360.2	utg25360|GWHAAAA00026996:9573-13152	CP_TkMS2	139.293	2.43083	-5.84054	-5.88109	5e-05	0.0151307	yes	XP_021987304.1	xyloglucan galactosyltransferase KATAMARI1 homolog [Helianthus annuus]	Q7XJ98	Xyloglucan galactosyltransferase MUR3 (EC 2.4.1.-) (Protein KATAMARI) (Protein MURUS 3) (AtMUR3) (Protein SHORT ROOT IN SALT MEDIUM 3)	GO:0005768; GO:0005794; GO:0005802; GO:0006486; GO:0009826; GO:0009863; GO:0009969; GO:0010256; GO:0016757; GO:0030173; GO:0032580; GO:0042353	endosome [GO:0005768]; Golgi apparatus [GO:0005794]; Golgi cisterna membrane [GO:0032580]; integral component of Golgi membrane [GO:0030173]; trans-Golgi network [GO:0005802]; transferase activity, transferring glycosyl groups [GO:0016757]; endomembrane system organization [GO:0010256]; fucose biosynthetic process [GO:0042353]; protein glycosylation [GO:0006486]; salicylic acid mediated signaling…
XLOC_022442	utg25432.3	utg25432|GWHAAAA00003222:14729-16309	CP_TkMS2	171.73	12.6466	-3.76332	-4.1251	5e-05	0.0151307	yes	XP_021990249.1	blue copper protein-like isoform X1 [Helianthus annuus]	P42849	Umecyanin (UMC)	GO:0009055; GO:0046872	electron transfer activity [GO:0009055]; metal ion binding [GO:0046872]
XLOC_022713	utg2570.3	utg2570|GWHAAAA00008155:12576-15131	CP_TkMS2	6.99895	145.281	4.37557	4.66504	0.0001	0.025044	yes	KVH93660.1	AAA+ ATPase domain-containing protein [Cynara cardunculus var. scolymus]	Q9FKM3	AAA-ATPase At5g57480 (EC 3.6.1.3)	GO:0005524; GO:0016887	ATP binding [GO:0005524]; ATPase activity [GO:0016887]
XLOC_023755	-	utg2677|GWHAAAA00020364:17551-18426	CP_TkMS2	6.35442	0	-Inf	NA	5e-05	0.0151307	yes	.	.	.	.	.	.
XLOC_023882	utg26934.6	utg26934|GWHAAAA00023927:14895-19855	CP_TkMS2	46.1918	0	-Inf	NA	5e-05	0.0151307	yes	XP_022776649.1	probable beta-1,3-galactosyltransferase 2 [Durio zibethinus]	Q9SAA4	Probable beta-1,3-galactosyltransferase 1 (EC 2.4.1.-)	GO:0000139; GO:0006486; GO:0008378; GO:0016021	Golgi membrane [GO:0000139]; integral component of membrane [GO:0016021]; galactosyltransferase activity [GO:0008378]; protein glycosylation [GO:0006486]
XLOC_023911	-	utg26968|GWHAAAA00012333:10810-12216	CP_TkMS2	9.53036	0	-Inf	NA	5e-05	0.0151307	yes	.	.	.	.	.	.
XLOC_024887	utg27954.4	utg27954|GWHAAAA00014063:11143-12252	CP_TkMS2	5.06504	0	-Inf	NA	5e-05	0.0151307	yes	XP_022032899.1	ethylene-responsive transcription factor ERF115-like [Helianthus annuus]	Q8L9K1	Ethylene-responsive transcription factor 13 (AtERF13) (Ethylene-responsive element-binding factor 13) (EREBP-13)	GO:0003677; GO:0003700; GO:0005634; GO:0006351; GO:0006952; GO:0009873; GO:0010200; GO:0043565	nucleus [GO:0005634]; DNA binding [GO:0003677]; DNA binding transcription factor activity [GO:0003700]; sequence-specific DNA binding [GO:0043565]; defense response [GO:0006952]; ethylene-activated signaling pathway [GO:0009873]; response to chitin [GO:0010200]; transcription, DNA-templated [GO:0006351]
XLOC_025034	utg28150.6	utg28150|GWHAAAA00012859:33736-35323	CP_TkMS2	2.31568	0	-Inf	NA	5e-05	0.0151307	yes	XP_021976144.1	dynein light chain, cytoplasmic-like isoform X1 [Helianthus annuus]	Q86A88	Dynein light chain, cytoplasmic (Dynein light chain LC8-type 2)	GO:0003774; GO:0005737; GO:0005868; GO:0005874; GO:0008092; GO:0010970; GO:0045505; GO:0051959; GO:0060271; GO:2000582	cytoplasm [GO:0005737]; cytoplasmic dynein complex [GO:0005868]; microtubule [GO:0005874]; cytoskeletal protein binding [GO:0008092]; dynein intermediate chain binding [GO:0045505]; dynein light intermediate chain binding [GO:0051959]; motor activity [GO:0003774]; cilium assembly [GO:0060271]; positive regulation of ATP-dependent microtubule motor activity, plus-end-directed [GO:2000582]; transpo…
XLOC_025349	utg2841.12	utg2841|GWHAAAA00000151:58312-59515	CP_TkMS2	271.374	8.94605	-4.92289	-6.67688	5e-05	0.0151307	yes	KVH88674.1	Uncharacterized protein family UPF0497, trans-membrane plant [Cynara cardunculus var. scolymus]	A7R385	CASP-like protein 2B1 (VvCASPL2B1)	GO:0005886; GO:0016021	integral component of membrane [GO:0016021]; plasma membrane [GO:0005886]
XLOC_025761	utg2887.17	utg2887|GWHAAAA00016059:73733-76941	CP_TkMS2	250.739	4.66346	-5.74864	-6.33599	5e-05	0.0151307	yes	XP_021978295.1	microtubule-associated protein TORTIFOLIA1-like [Helianthus annuus]	Q9T041	Microtubule-associated protein TORTIFOLIA1 (Microtubule-associated protein SPIRAL2) (Protein CONVOLUTA)	GO:0007275; GO:0008017; GO:0009826; GO:0010005; GO:0010031	cortical microtubule, transverse to long axis [GO:0010005]; microtubule binding [GO:0008017]; circumnutation [GO:0010031]; multicellular organism development [GO:0007275]; unidimensional cell growth [GO:0009826]
XLOC_025764	utg2887.35	utg2887|GWHAAAA00016059:156383-159670	CP_TkMS2	97.0231	3.69225	-4.71576	-5.5149	0.0001	0.025044	yes	XP_021978275.1	uncharacterized protein LOC110873622 [Helianthus annuus]	Q66GQ2	Uncharacterized protein At5g41620	GO:0005886; GO:0009507	chloroplast [GO:0009507]; plasma membrane [GO:0005886]
XLOC_025814	utg28909.1	utg28909|GWHAAAA00029104:4350-18403	CP_TkMS2	0	1.83096	Inf	NA	5e-05	0.0151307	yes	CDP19279.1	unnamed protein product [Coffea canephora]	Q9DC26	Solute carrier family 46 member 3	GO:0016021; GO:0055085; GO:0070062	extracellular exosome [GO:0070062]; integral component of membrane [GO:0016021]; transmembrane transport [GO:0055085]
XLOC_026748	utg29916.8	utg29916|GWHAAAA00009120:35488-36025	CP_TkMS2	9.44262	0	-Inf	NA	5e-05	0.0151307	yes	XP_006467611.1	PREDICTED: uncharacterized protein LOC102627023 [Citrus sinensis]	Q52K95	Precursor of CEP14 (PCEP14) [Cleaved into: C-terminally encoded peptide 14 (CEP14)]	GO:0005179; GO:0006970; GO:0007275; GO:0010037; GO:0048046; GO:1902025; GO:2000280	apoplast [GO:0048046]; hormone activity [GO:0005179]; multicellular organism development [GO:0007275]; nitrate import [GO:1902025]; regulation of root development [GO:2000280]; response to carbon dioxide [GO:0010037]; response to osmotic stress [GO:0006970]
XLOC_026812	utg29973.5	utg29973|GWHAAAA00025500:25395-26204	CP_TkMS2	11.6648	0	-Inf	NA	5e-05	0.0151307	yes	XP_022029426.1	protein DMR6-LIKE OXYGENASE 2-like [Helianthus annuus]	Q9ZSA7	Protein DMR6-LIKE OXYGENASE 2 (EC 1.14.11.-) (2-oxoglutarate (2OG)-Fe(II) oxygenase-like protein DLO2) (Salicylate 3-hydroxylase DLO2) (S3H DLO2) (SA 3-hydroxylase DLO2) (Salicylic acid 3-hydroxylase DLO2) (EC 1.14.13.-)	GO:0002229; GO:0046244; GO:0046872; GO:0051213	dioxygenase activity [GO:0051213]; metal ion binding [GO:0046872]; defense response to oomycetes [GO:0002229]; salicylic acid catabolic process [GO:0046244]
XLOC_026902	-	utg30065|GWHAAAA00010241:19287-20115	CP_TkMS2	4.97738	0	-Inf	NA	5e-05	0.0151307	yes	.	.	.	.	.	.
XLOC_027360	utg3059.1	utg3059|GWHAAAA00030730:2088-2968	CP_TkMS2	2.89762	0	-Inf	NA	0.0003	0.0473658	yes	KVI07064.1	hypothetical protein Ccrd_014562 [Cynara cardunculus var. scolymus]	Q3ZBE6	Transmembrane protein 135	GO:0005739; GO:0005777; GO:0005778; GO:0016021; GO:0031966; GO:0090140	integral component of membrane [GO:0016021]; mitochondrial membrane [GO:0031966]; mitochondrion [GO:0005739]; peroxisomal membrane [GO:0005778]; peroxisome [GO:0005777]; regulation of mitochondrial fission [GO:0090140]
XLOC_027798	-	utg3110|GWHAAAA00002252:24023-25135	CP_TkMS2	4.10845	0	-Inf	NA	5e-05	0.0151307	yes	.	.	.	.	.	.
XLOC_028112	utg3146.7	utg3146|GWHAAAA00018577:28505-29838	CP_TkMS2	2.56082	0	-Inf	NA	5e-05	0.0151307	yes	KVH99466.1	Protein of unknown function DUF1645 [Cynara cardunculus var. scolymus]	Q58531	GMP synthase [glutamine-hydrolyzing] subunit B (EC 6.3.5.2) (GMP synthetase)	GO:0003921; GO:0003922; GO:0005524; GO:0006177; GO:0016462	ATP binding [GO:0005524]; GMP synthase (glutamine-hydrolyzing) activity [GO:0003922]; GMP synthase activity [GO:0003921]; pyrophosphatase activity [GO:0016462]; GMP biosynthetic process [GO:0006177]
XLOC_028475	-	utg31920|GWHAAAA00013214:23236-23541	CP_TkMS2	49.8253	0	-Inf	NA	5e-05	0.0151307	yes	.	.	.	.	.	.
XLOC_028483	utg31934.1	utg31934|GWHAAAA00003022:18078-19267	CP_TkMS2	4.271	0	-Inf	NA	0.0002	0.0360882	yes	XP_022041839.1	uncharacterized protein LOC110944482 [Helianthus annuus]	Q10435	Probable ubiquitin fusion degradation protein C12B10.01c (HECT-type E3 ubiquitin transferase C12B10.01c) (EC 2.3.2.26)	GO:0005634; GO:0005737; GO:0005829; GO:0006511; GO:0043234; GO:0061630	cytoplasm [GO:0005737]; cytosol [GO:0005829]; nucleus [GO:0005634]; protein complex [GO:0043234]; ubiquitin protein ligase activity [GO:0061630]; ubiquitin-dependent protein catabolic process [GO:0006511]
XLOC_028525	utg3197.2	utg3197|GWHAAAA00006338:28258-28471	CP_TkMS2	115.49	0	-Inf	NA	5e-05	0.0151307	yes	OTG10530.1	putative cyclin-like protein [Helianthus annuus]	Q75I54	Cyclin-A3-1 (G2/mitotic-specific cyclin-A3-1) (CycA3;1)	GO:0005634; GO:0007049; GO:0051301	nucleus [GO:0005634]; cell cycle [GO:0007049]; cell division [GO:0051301]
XLOC_028888	utg32466.2	utg32466|GWHAAAA00021413:4744-6864	CP_TkMS2	5.48513	0	-Inf	NA	5e-05	0.0151307	yes	OMO91383.1	hypothetical protein COLO4_18413 [Corchorus olitorius]	Q9STF7	Subtilisin-like protease SBT4.6 (EC 3.4.21.-) (Subtilase subfamily 4 member 6) (AtSBT4.6)	GO:0004252; GO:0005576	extracellular region [GO:0005576]; serine-type endopeptidase activity [GO:0004252]
XLOC_029008	-	utg32623|GWHAAAA00003526:5500-6344	CP_TkMS2	4.16271	0	-Inf	NA	5e-05	0.0151307	yes	.	.	.	.	.	.
XLOC_029023	-	utg32645|GWHAAAA00021252:4237-5238	CP_TkMS2	6.54954	0	-Inf	NA	0.0002	0.0360882	yes	.	.	.	.	.	.
XLOC_029631	-	utg33458|GWHAAAA00026103:6343-6827	CP_TkMS2	9.60611	0	-Inf	NA	0.0001	0.025044	yes	.	.	.	.	.	.
XLOC_029914	utg33861.6	utg33861|GWHAAAA00023496:7889-8788	CP_TkMS2	2.81384	0	-Inf	NA	0.0003	0.0473658	yes	KVH91971.1	AP2/ERF domain-containing protein [Cynara cardunculus var. scolymus]	O80338	Ethylene-responsive transcription factor 2 (AtERF2) (Ethylene-responsive element-binding factor 2) (EREBP-2)	GO:0003677; GO:0003700; GO:0005634; GO:0006351; GO:0009864; GO:0009873; GO:0010087; GO:0010200; GO:0045893; GO:0051301	nucleus [GO:0005634]; DNA binding [GO:0003677]; DNA binding transcription factor activity [GO:0003700]; cell division [GO:0051301]; ethylene-activated signaling pathway [GO:0009873]; induced systemic resistance, jasmonic acid mediated signaling pathway [GO:0009864]; phloem or xylem histogenesis [GO:0010087]; positive regulation of transcription, DNA-templated [GO:0045893]; response to chitin [GO:…
XLOC_029934	utg3386.9	utg3386|GWHAAAA00003474:56446-58672	CP_TkMS2	73.0662	3.36266	-4.44153	-4.65353	0.0003	0.0473658	yes	KVI06163.1	SWEET sugar transporter [Cynara cardunculus var. scolymus]	O82587	Bidirectional sugar transporter SWEET12 (AtSWEET12) (MtN3-like protein) (Protein SUGARS WILL EVENTUALLY BE EXPORTED TRANSPORTERS 12)	GO:0005886; GO:0005887; GO:0008515; GO:0009793; GO:0010431; GO:0015770; GO:0016021; GO:0051119; GO:0051260	integral component of membrane [GO:0016021]; integral component of plasma membrane [GO:0005887]; plasma membrane [GO:0005886]; sucrose transmembrane transporter activity [GO:0008515]; sugar transmembrane transporter activity [GO:0051119]; embryo development ending in seed dormancy [GO:0009793]; protein homooligomerization [GO:0051260]; seed maturation [GO:0010431]; sucrose transport [GO:0015770]
XLOC_030102	utg3405.2	utg3405|GWHAAAA00021269:7579-9880	CP_TkMS2	7.28523	0	-Inf	NA	5e-05	0.0151307	yes	ABF48495.1	putative cinnamyl alcohol dehydrogenase [Linum usitatissimum]	P31656	Probable cinnamyl alcohol dehydrogenase (CAD) (EC 1.1.1.195)	GO:0008270; GO:0009809; GO:0045551; GO:0052747	cinnamyl-alcohol dehydrogenase activity [GO:0045551]; sinapyl alcohol dehydrogenase activity [GO:0052747]; zinc ion binding [GO:0008270]; lignin biosynthetic process [GO:0009809]
XLOC_030399	utg34465.4	utg34465|GWHAAAA00009126:18576-19167	CP_TkMS2	6.23183	0	-Inf	NA	0.00015	0.0327643	yes	XP_022021424.1	calcium-binding protein CML38-like [Helianthus annuus]	Q9SRE6	Calcium-binding protein CML38 (Calmodulin-like protein 38)	GO:0005509; GO:0005886; GO:0009611	plasma membrane [GO:0005886]; calcium ion binding [GO:0005509]; response to wounding [GO:0009611]
XLOC_030519	-	utg3462|GWHAAAA00027881:33817-34218	CP_TkMS2	12.2487	0	-Inf	NA	5e-05	0.0151307	yes	.	.	.	.	.	.
XLOC_030629	-	utg3477|GWHAAAA00007103:50386-51625	CP_TkMS2	2.60217	0	-Inf	NA	5e-05	0.0151307	yes	.	.	.	.	.	.
XLOC_030717	utg34905.1	utg34905|GWHAAAA00004078:1237-7213	CP_TkMS2	154.566	5.85839	-4.72158	-5.04993	0.0001	0.025044	yes	XP_022005456.1	ABC transporter B family member 15-like [Helianthus annuus]	Q9LHD1	ABC transporter B family member 15 (ABC transporter ABCB.15) (AtABCB15) (Multidrug resistance protein 13) (P-glycoprotein 15)	GO:0005524; GO:0005886; GO:0016021; GO:0042626	integral component of membrane [GO:0016021]; plasma membrane [GO:0005886]; ATP binding [GO:0005524]; ATPase activity, coupled to transmembrane movement of substances [GO:0042626]
XLOC_030763	utg34948.1	utg34948|GWHAAAA00020772:1208-3761	CP_TkMS2	175.12	11.4747	-3.93182	-4.31345	0.00015	0.0327643	yes	XP_021987473.1	protein MARD1 [Helianthus annuus]	Q8LGS1	Protein MARD1 (Mediator of ABA-regulated dormancy1) (Senescence-associated protein SAG102)	GO:0000932; GO:0009737; GO:0010162; GO:0010494; GO:0046872	cytoplasmic stress granule [GO:0010494]; P-body [GO:0000932]; metal ion binding [GO:0046872]; response to abscisic acid [GO:0009737]; seed dormancy process [GO:0010162]
XLOC_030924	utg3511.8	utg3511|GWHAAAA00014306:30528-32931	CP_TkMS2	4.13055	0	-Inf	NA	5e-05	0.0151307	yes	KVH91670.1	Calcium/calmodulin-dependent/calcium-dependent protein kinase [Cynara cardunculus var. scolymus]	Q9SEZ7	CBL-interacting serine/threonine-protein kinase 16 (EC 2.7.11.1) (SNF1-related kinase 3.18) (SOS2-like protein kinase PKS15)	GO:0004674; GO:0005524; GO:0005622; GO:0006814; GO:0018105; GO:0018107; GO:0035556; GO:0042538	intracellular [GO:0005622]; ATP binding [GO:0005524]; protein serine/threonine kinase activity [GO:0004674]; hyperosmotic salinity response [GO:0042538]; intracellular signal transduction [GO:0035556]; peptidyl-serine phosphorylation [GO:0018105]; peptidyl-threonine phosphorylation [GO:0018107]; sodium ion transport [GO:0006814]
XLOC_031141	utg35477.8	utg35477|GWHAAAA00019972:26822-27601	CP_TkMS2	58.8449	1030.81	4.13072	4.40143	0.0003	0.0473658	yes	OTF91088.1	putative glycine rich protein [Helianthus annuus]	P23137	Glycine-rich protein	GO:0005576; GO:0005618; GO:0006952; GO:0009607; GO:0071555	cell wall [GO:0005618]; extracellular region [GO:0005576]; cell wall organization [GO:0071555]; defense response [GO:0006952]; response to biotic stimulus [GO:0009607]
XLOC_031400	utg35866.1	utg35866|GWHAAAA00031394:4001-6684	CP_TkMS2	2.13327	0	-Inf	NA	5e-05	0.0151307	yes	.	.	O13695	Uncharacterized serine-rich protein C11G7.01	GO:0016021	integral component of membrane [GO:0016021]
XLOC_031822	utg3636.3	utg3636|GWHAAAA00015663:8631-13499	CP_TkMS2	23.0502	1.27494	-4.17628	-4.7614	0.0002	0.0360882	yes	XP_022025001.1	uncharacterized protein LOC110925354 [Helianthus annuus]	E1C3S7	Tudor domain-containing protein 7	GO:0002089; GO:0003729; GO:0005737; GO:0007283; GO:0010608; GO:0035770; GO:0070306	cytoplasm [GO:0005737]; ribonucleoprotein granule [GO:0035770]; mRNA binding [GO:0003729]; lens fiber cell differentiation [GO:0070306]; lens morphogenesis in camera-type eye [GO:0002089]; posttranscriptional regulation of gene expression [GO:0010608]; spermatogenesis [GO:0007283]
XLOC_032978	utg3907.4	utg3907|GWHAAAA00027405:16313-20331	CP_TkMS2	80.5477	4.27184	-4.23691	-5.21552	0.0003	0.0473658	yes	KVH91495.1	General substrate transporter [Cynara cardunculus var. scolymus]	Q494P0	Probable inorganic phosphate transporter 1-7 (AtPht1;7) (H(+)/Pi cotransporter)	GO:0005315; GO:0005886; GO:0005887; GO:0006817; GO:0015293; GO:1901683; GO:1901684	integral component of plasma membrane [GO:0005887]; plasma membrane [GO:0005886]; arsenate ion transmembrane transporter activity [GO:1901683]; inorganic phosphate transmembrane transporter activity [GO:0005315]; symporter activity [GO:0015293]; arsenate ion transmembrane transport [GO:1901684]; phosphate ion transport [GO:0006817]
XLOC_033543	utg4113.14	utg4113|GWHAAAA00003544:91855-94554	CP_TkMS2	1.23753	0	-Inf	NA	0.0002	0.0360882	yes	XP_022006232.1	uncharacterized protein LOC110904671 [Helianthus annuus]	P0C2F6	Putative ribonuclease H protein At1g65750 (EC 3.1.26.4)	GO:0003676; GO:0004523; GO:0046872	metal ion binding [GO:0046872]; nucleic acid binding [GO:0003676]; RNA-DNA hybrid ribonuclease activity [GO:0004523]
XLOC_033678	utg4171.9	utg4171|GWHAAAA00009005:44907-46893	CP_TkMS2	1.79055	0	-Inf	NA	0.00015	0.0327643	yes	XP_021998560.1	vacuolar-sorting protein BRO1-like [Helianthus annuus]	F4HXZ1	Vacuolar-sorting protein BRO1 (BRO domain-containing protein 1) (AtBRO1)	GO:0005737; GO:0005770; GO:0005771; GO:0005829; GO:0007033; GO:0009506; GO:0015031; GO:0036257; GO:0043130; GO:0043621	cytoplasm [GO:0005737]; cytosol [GO:0005829]; late endosome [GO:0005770]; multivesicular body [GO:0005771]; plasmodesma [GO:0009506]; protein self-association [GO:0043621]; ubiquitin binding [GO:0043130]; multivesicular body organization [GO:0036257]; protein transport [GO:0015031]; vacuole organization [GO:0007033]
XLOC_033866	utg4252.1	utg4252|GWHAAAA00003815:5904-7228	CP_TkMS2	11.9871	0	-Inf	NA	5e-05	0.0151307	yes	XP_022002238.1	uncharacterized protein At1g04910-like [Helianthus annuus]	Q8LPF8	O-fucosyltransferase 29 (O-FucT-29) (EC 2.4.1.-) (O-fucosyltransferase family protein)	GO:0005768; GO:0005794; GO:0005802; GO:0006004; GO:0006486; GO:0016021; GO:0016757	endosome [GO:0005768]; Golgi apparatus [GO:0005794]; integral component of membrane [GO:0016021]; trans-Golgi network [GO:0005802]; transferase activity, transferring glycosyl groups [GO:0016757]; fucose metabolic process [GO:0006004]; protein glycosylation [GO:0006486]
XLOC_034264	utg4362.18	utg4362|GWHAAAA00006570:81663-84676	CP_TkMS2	7.81608	0	-Inf	NA	5e-05	0.0151307	yes	KVH90305.1	Tetraspanin [Cynara cardunculus var. scolymus]	Q9M1E7	Tetraspanin-3	GO:0005886; GO:0009506; GO:0016021	integral component of membrane [GO:0016021]; plasma membrane [GO:0005886]; plasmodesma [GO:0009506]
XLOC_034858	utg4572.18	utg4572|GWHAAAA00002897:168652-169577	CP_TkMS2	5.11275	0	-Inf	NA	5e-05	0.0151307	yes	XP_022007453.1	uncharacterized protein LOC110906658 [Helianthus annuus]	Q7CR84	Cell division protein FtsL	GO:0005886; GO:0007049; GO:0016021; GO:0051301	integral component of membrane [GO:0016021]; plasma membrane [GO:0005886]; cell cycle [GO:0007049]; cell division [GO:0051301]
XLOC_035198	utg4703.5	utg4703|GWHAAAA00013288:21789-25369	CP_TkMS2	61.5119	1.09299	-5.81452	-5.81916	5e-05	0.0151307	yes	AAQ15123.1	putative ethylene receptor ETR2 [Lactuca sativa]	Q0WPQ2	Ethylene receptor 2 (AtETR2) (EC 2.7.11.-) (Protein ETHYLENE RESPONSE 2) (Protein ETR2)	GO:0000155; GO:0004674; GO:0004872; GO:0005524; GO:0005783; GO:0005789; GO:0010105; GO:0016021; GO:0038199; GO:0046872; GO:0051740	endoplasmic reticulum [GO:0005783]; endoplasmic reticulum membrane [GO:0005789]; integral component of membrane [GO:0016021]; ATP binding [GO:0005524]; ethylene binding [GO:0051740]; ethylene receptor activity [GO:0038199]; metal ion binding [GO:0046872]; phosphorelay sensor kinase activity [GO:0000155]; protein serine/threonine kinase activity [GO:0004674]; receptor activity [GO:0004872]; negati…
XLOC_035238	-	utg4716|GWHAAAA00003049:35824-37472	CP_TkMS2	2.37637	0	-Inf	NA	0.0003	0.0473658	yes	.	.	.	.	.	.
XLOC_035681	utg487.1	utg487|GWHAAAA00018178:2855-4340	CP_TkMS2	10.1863	0	-Inf	NA	5e-05	0.0151307	yes	KVH96323.1	Protein of unknown function DUF1262 [Cynara cardunculus var. scolymus]	B3EWZ6	MAM and LDL-receptor class A domain-containing protein 2 (Skeletal organic matrix MAM and LDL-receptor 2) (SOM MAM and LDL-receptor 2) (Fragment)	GO:0005576; GO:0016020	extracellular region [GO:0005576]; membrane [GO:0016020]
XLOC_035996	utg498.2	utg498|GWHAAAA00017535:11648-13723	CP_TkMS2	1.80493	0	-Inf	NA	0.0001	0.025044	yes	KVI10248.1	No apical meristem (NAM) protein, partial [Cynara cardunculus var. scolymus]	Q9SK55	Transcription factor JUNGBRUNNEN 1 (NAC domain-containing protein 42) (ANAC042)	GO:0003677; GO:0003700; GO:0005634; GO:0005992; GO:0006351; GO:0006561; GO:0009718; GO:0010120; GO:0010150; GO:0042538; GO:1900056	nucleus [GO:0005634]; DNA binding [GO:0003677]; DNA binding transcription factor activity [GO:0003700]; anthocyanin-containing compound biosynthetic process [GO:0009718]; camalexin biosynthetic process [GO:0010120]; hyperosmotic salinity response [GO:0042538]; leaf senescence [GO:0010150]; negative regulation of leaf senescence [GO:1900056]; proline biosynthetic process [GO:0006561]; transcriptio…
XLOC_036195	utg5046.7	utg5046|GWHAAAA00010457:33240-40826	CP_TkMS2	3.77643	0	-Inf	NA	5e-05	0.0151307	yes	KJB20310.1	hypothetical protein B456_003G143200 [Gossypium raimondii]	Q8GW29	Cytokinin riboside 5'-monophosphate phosphoribohydrolase LOG7 (EC 3.2.2.n1) (Protein LONELY GUY 7)	GO:0005634; GO:0005829; GO:0009691; GO:0016787	cytosol [GO:0005829]; nucleus [GO:0005634]; hydrolase activity [GO:0016787]; cytokinin biosynthetic process [GO:0009691]
XLOC_036231	utg5059.8	utg5059|GWHAAAA00029504:19594-32038	CP_TkMS2	26.2243	0.547306	-5.58241	-5.51777	5e-05	0.0151307	yes	KVH93104.1	Calcium-binding EF-hand [Cynara cardunculus var. scolymus]	Q6K3R5	Sodium/calcium exchanger NCL2 (Na(+)/Ca(2+)-exchange protein NCL2) (OsEFCAX2) (Protein NCX-like 2) (OsNCL2)	GO:0005432; GO:0005509; GO:0005886; GO:0016021; GO:0055074	integral component of membrane [GO:0016021]; plasma membrane [GO:0005886]; calcium ion binding [GO:0005509]; calcium:sodium antiporter activity [GO:0005432]; calcium ion homeostasis [GO:0055074]
XLOC_036451	-	utg5151|GWHAAAA00012821:925-2289	CP_TkMS2	0	2.45532	Inf	NA	5e-05	0.0151307	yes	.	.	.	.	.	.
XLOC_036523	-	utg5185|GWHAAAA00001246:62315-62644	CP_TkMS2	24.9864	0	-Inf	NA	5e-05	0.0151307	yes	.	.	.	.	.	.
XLOC_036526	utg5187.9	utg5187|GWHAAAA00010723:30718-37443	CP_TkMS2	212.692	1.01178	-7.71573	-5.76515	5e-05	0.0151307	yes	XP_001429586.1	hypothetical protein [Paramecium tetraurelia strain d4-2]	.	.	.	.
XLOC_036755	-	utg5269|GWHAAAA00005464:29999-30861	CP_TkMS2	6.62149	0	-Inf	NA	0.00015	0.0327643	yes	.	.	.	.	.	.
XLOC_037505	utg5531.5	utg5531|GWHAAAA00008024:18672-20035	CP_TkMS2	10.1891	0	-Inf	NA	5e-05	0.0151307	yes	XP_022029426.1	protein DMR6-LIKE OXYGENASE 2-like [Helianthus annuus]	Q9ZSA7	Protein DMR6-LIKE OXYGENASE 2 (EC 1.14.11.-) (2-oxoglutarate (2OG)-Fe(II) oxygenase-like protein DLO2) (Salicylate 3-hydroxylase DLO2) (S3H DLO2) (SA 3-hydroxylase DLO2) (Salicylic acid 3-hydroxylase DLO2) (EC 1.14.13.-)	GO:0002229; GO:0046244; GO:0046872; GO:0051213	dioxygenase activity [GO:0051213]; metal ion binding [GO:0046872]; defense response to oomycetes [GO:0002229]; salicylic acid catabolic process [GO:0046244]
XLOC_038025	utg5754.1	utg5754|GWHAAAA00023085:1855-5715	CP_TkMS2	2.27568	0	-Inf	NA	5e-05	0.0151307	yes	OTG27298.1	putative NB-ARC [Helianthus annuus]	Q9FI14	Disease resistance protein TAO1 (Protein TARGET OF AVRB OPERATION 1)	GO:0005524; GO:0007165; GO:0009816; GO:0042742; GO:0043531	ADP binding [GO:0043531]; ATP binding [GO:0005524]; defense response to bacterium [GO:0042742]; defense response to bacterium, incompatible interaction [GO:0009816]; signal transduction [GO:0007165]
XLOC_038036	-	utg5757|GWHAAAA00022857:11592-22354	CP_TkMS2	3.07633	0	-Inf	NA	0.0002	0.0360882	yes	.	.	.	.	.	.
XLOC_038039	utg5759.5	utg5759|GWHAAAA00003478:23403-23975	CP_TkMS2	23.19	0	-Inf	NA	5e-05	0.0151307	yes	XP_022001638.1	uncharacterized protein LOC110899069 [Helianthus annuus]	Q1IWF4	CinA-like protein	NA	NA
XLOC_038122	utg5800.3	utg5800|GWHAAAA00019989:18743-20346	CP_TkMS2	226.013	7.8006	-4.85668	-6.70509	0.0002	0.0360882	yes	AAC49326.1	wounding-induced ribonuclease gene [Zinnia violacea]	P80022	Extracellular ribonuclease LE (RNase LE) (EC 3.1.27.1)	GO:0003723; GO:0005615; GO:0005618; GO:0033897	cell wall [GO:0005618]; extracellular space [GO:0005615]; ribonuclease T2 activity [GO:0033897]; RNA binding [GO:0003723]
XLOC_038163	utg5825.24	utg5825|GWHAAAA00009077:106026-112215	CP_TkMS2	6.18857	0	-Inf	NA	5e-05	0.0151307	yes	WP_015612532.1	MULTISPECIES: LacI family transcriptional regulator [Streptomyces]	P27816	Microtubule-associated protein 4 (MAP-4)	GO:0003723; GO:0005198; GO:0005874; GO:0005875; GO:0005930; GO:0007052; GO:0008017; GO:0014069; GO:0031175; GO:0043005; GO:0051012; GO:0051294; GO:0051301; GO:0070062; GO:0072686; GO:1902856	axoneme [GO:0005930]; extracellular exosome [GO:0070062]; microtubule [GO:0005874]; microtubule associated complex [GO:0005875]; mitotic spindle [GO:0072686]; neuron projection [GO:0043005]; postsynaptic density [GO:0014069]; microtubule binding [GO:0008017]; RNA binding [GO:0003723]; structural molecule activity [GO:0005198]; cell division [GO:0051301]; establishment of spindle orientation [GO:0…
XLOC_038771	utg6098.4	utg6098|GWHAAAA00011230:31822-33112	CP_TkMS2	379.534	17.6192	-4.42901	-5.73412	0.0001	0.025044	yes	KVI02983.1	Maf transcription factor, N-terminal, partial [Cynara cardunculus var. scolymus]	O22755	Probable E3 ubiquitin-protein ligase ATL44 (EC 2.3.2.27) (RING-H2 finger A3a) (RING-H2 finger protein ATL44) (RING-H2 zinc finger protein RHA3a) (RING-type E3 ubiquitin transferase ATL44)	GO:0016021; GO:0043161; GO:0046872; GO:0061630	integral component of membrane [GO:0016021]; metal ion binding [GO:0046872]; ubiquitin protein ligase activity [GO:0061630]; proteasome-mediated ubiquitin-dependent protein catabolic process [GO:0043161]
XLOC_038807	-	utg612|GWHAAAA00001230:1705-3493	CP_TkMS2	2.39627	0	-Inf	NA	0.0001	0.025044	yes	.	.	.	.	.	.
XLOC_038841	utg6156.21	utg6156|GWHAAAA00016723:136453-139370	CP_TkMS2	174.387	7.98652	-4.44858	-4.58905	0.00015	0.0327643	yes	KVH94381.1	hypothetical protein Ccrd_003557 [Cynara cardunculus var. scolymus]	Q9M1W7	F-box/kelch-repeat protein SKIP30 (SKP1-interacting partner 30)	GO:0016567	protein ubiquitination [GO:0016567]
XLOC_038846	-	utg6156|GWHAAAA00016723:20847-22136	CP_TkMS2	1.76587	0	-Inf	NA	0.0003	0.0473658	yes	.	.	.	.	.	.
XLOC_039236	utg632.6	utg632|GWHAAAA00009408:21301-23229	CP_TkMS2	1.60843	0	-Inf	NA	0.0002	0.0360882	yes	XP_022019605.1	uncharacterized protein LOC110919650 [Helianthus annuus]	Q8EAR3	Peptide chain release factor 1 (RF-1)	GO:0005737; GO:0016149	cytoplasm [GO:0005737]; translation release factor activity, codon specific [GO:0016149]
XLOC_039614	utg6516.2	utg6516|GWHAAAA00012826:18373-20253	CP_TkMS2	2.74786	0	-Inf	NA	0.00015	0.0327643	yes	AJF11724.1	WRKY48 [Chrysanthemum x morifolium]	O22900	Probable WRKY transcription factor 23 (WRKY DNA-binding protein 23)	GO:0003700; GO:0005634; GO:0006351; GO:0009624; GO:0009733; GO:0043565	nucleus [GO:0005634]; DNA binding transcription factor activity [GO:0003700]; sequence-specific DNA binding [GO:0043565]; response to auxin [GO:0009733]; response to nematode [GO:0009624]; transcription, DNA-templated [GO:0006351]
XLOC_040240	utg6816.3	utg6816|GWHAAAA00022705:13728-17427	CP_TkMS2	2.48511	0	-Inf	NA	0.0002	0.0360882	yes	XP_022023671.1	acyl-protein thioesterase 1 homolog 1-like [Helianthus annuus]	Q9WTL7	Acyl-protein thioesterase 2 (APT-2) (EC 3.1.2.-) (Lysophospholipase 2) (Lysophospholipase II) (LPL-II) (LysoPLA II) (mLyso II)	GO:0002084; GO:0005737; GO:0005795; GO:0006631; GO:0008474; GO:0045296; GO:0052689; GO:0070062	cytoplasm [GO:0005737]; extracellular exosome [GO:0070062]; Golgi stack [GO:0005795]; cadherin binding [GO:0045296]; carboxylic ester hydrolase activity [GO:0052689]; palmitoyl-(protein) hydrolase activity [GO:0008474]; fatty acid metabolic process [GO:0006631]; protein depalmitoylation [GO:0002084]
XLOC_040339	utg6855.7	utg6855|GWHAAAA00001094:62635-64559	CP_TkMS2	3.59094	0	-Inf	NA	5e-05	0.0151307	yes	KVI12386.1	cytochrome P450 [Cynara cardunculus var. scolymus]	O81117	Cytochrome P450 94A1 (EC 1.14.-.-) (P450-dependent fatty acid omega-hydroxylase)	GO:0004497; GO:0005506; GO:0005789; GO:0016021; GO:0016705; GO:0020037	endoplasmic reticulum membrane [GO:0005789]; integral component of membrane [GO:0016021]; heme binding [GO:0020037]; iron ion binding [GO:0005506]; monooxygenase activity [GO:0004497]; oxidoreductase activity, acting on paired donors, with incorporation or reduction of molecular oxygen [GO:0016705]
XLOC_040778	utg6996.8	utg6996|GWHAAAA00001571:51629-53312	CP_TkMS2	1.95945	0	-Inf	NA	0.0002	0.0360882	yes	WP_077391582.1	2-hydroxyacyl-CoA dehydratase [Mobilibacterium timonense]	F2JXJ3	L-lysine 6-oxidase (EC 1.4.3.20) (L-lysine-epsilon-oxidase) (Marinocine)	GO:0005576; GO:0031640; GO:0033736; GO:0042742; GO:0048038; GO:1900191	extracellular region [GO:0005576]; L-lysine 6-oxidase activity [GO:0033736]; quinone binding [GO:0048038]; defense response to bacterium [GO:0042742]; killing of cells of other organism [GO:0031640]; negative regulation of single-species biofilm formation [GO:1900191]
XLOC_041510	utg7327.31	utg7327|GWHAAAA00008735:165861-168898	CP_TkMS2	78.5439	1.5384	-5.674	-6.46244	0.0002	0.0360882	yes	KVH97260.1	Aminotransferase, class I/classII [Cynara cardunculus var. scolymus]	Q07262	1-aminocyclopropane-1-carboxylate synthase (ACC synthase) (EC 4.4.1.14) (S-adenosyl-L-methionine methylthioadenosine-lyase)	GO:0009693; GO:0009835; GO:0016847; GO:0030170	1-aminocyclopropane-1-carboxylate synthase activity [GO:0016847]; pyridoxal phosphate binding [GO:0030170]; ethylene biosynthetic process [GO:0009693]; fruit ripening [GO:0009835]
XLOC_042208	utg7664.15	utg7664|GWHAAAA00025537:51350-54452	CP_TkMS2	0.991327	0	-Inf	NA	5e-05	0.0151307	yes	WP_082895469.1	ATP-binding protein [Rhodococcus corynebacterioides]	.	.	.	.
XLOC_042398	-	utg7729|GWHAAAA00020885:98542-99956	CP_TkMS2	4.82098	0	-Inf	NA	0.0003	0.0473658	yes	.	.	.	.	.	.
XLOC_042878	utg7919.1	utg7919|GWHAAAA00008892:17393-18690	CP_TkMS2	2.73617	0	-Inf	NA	0.0002	0.0360882	yes	XP_021993538.1	ethylene-responsive transcription factor 1B-like [Helianthus annuus]	Q8LDC8	Ethylene-responsive transcription factor 1B (AtERF1B) (Ethylene-responsive element-binding factor 1B) (EREBP-1B)	GO:0003677; GO:0003700; GO:0005634; GO:0006351; GO:0006952; GO:0009867; GO:0009873	nucleus [GO:0005634]; DNA binding [GO:0003677]; DNA binding transcription factor activity [GO:0003700]; defense response [GO:0006952]; ethylene-activated signaling pathway [GO:0009873]; jasmonic acid mediated signaling pathway [GO:0009867]; transcription, DNA-templated [GO:0006351]
XLOC_043223	-	utg8076|GWHAAAA00028115:11185-12326	CP_TkMS2	2.65063	0	-Inf	NA	0.0002	0.0360882	yes	.	.	.	.	.	.
XLOC_043785	-	utg8312|GWHAAAA00002840:42528-42983	CP_TkMS2	11.0507	0	-Inf	NA	0.0002	0.0360882	yes	.	.	.	.	.	.
XLOC_044101	utg8464.23	utg8464|GWHAAAA00002539:88949-90515	CP_TkMS2	4.90315	0	-Inf	NA	5e-05	0.0151307	yes	XP_021989788.1	basic 7S globulin 2-like [Helianthus annuus]	Q8RVH5	Basic 7S globulin 2 (SBg7S) (Bg) [Cleaved into: Basic 7S globulin 2 high kDa subunit; Basic 7S globulin 2 low kDa subunit]	GO:0004190; GO:0006508; GO:0030163; GO:0045735	aspartic-type endopeptidase activity [GO:0004190]; nutrient reservoir activity [GO:0045735]; protein catabolic process [GO:0030163]; proteolysis [GO:0006508]
XLOC_044125	utg8481.1	utg8481|GWHAAAA00020291:53851-54673	CP_TkMS2	3.82476	0	-Inf	NA	0.00015	0.0327643	yes	XP_021993668.1	uncharacterized protein LOC110890377 [Helianthus annuus]	Q5A8K2	Alanine--tRNA ligase (EC 6.1.1.7) (Alanyl-tRNA synthetase) (AlaRS)	GO:0000049; GO:0004813; GO:0005524; GO:0005737; GO:0005739; GO:0006419; GO:0046872	cytoplasm [GO:0005737]; mitochondrion [GO:0005739]; alanine-tRNA ligase activity [GO:0004813]; ATP binding [GO:0005524]; metal ion binding [GO:0046872]; tRNA binding [GO:0000049]; alanyl-tRNA aminoacylation [GO:0006419]
XLOC_044127	-	utg8482|GWHAAAA00020203:7535-8188	CP_TkMS2	0	13.1958	Inf	NA	5e-05	0.0151307	yes	.	.	.	.	.	.
XLOC_044605	utg8695.7	utg8695|GWHAAAA00006650:54869-56591	CP_TkMS2	230.601	13.4815	-4.09634	-5.32419	0.0003	0.0473658	yes	XP_021973155.1	aquaporin PIP2-4-like [Helianthus annuus]	Q9FF53	Probable aquaporin PIP2-4 (Plasma membrane intrinsic protein 2.4) (AtPIP2;4) [Cleaved into: Probable aquaporin PIP2-4, N-terminally processed]	GO:0005887; GO:0009506; GO:0009737; GO:0015250; GO:0034220; GO:0048767; GO:0080170	integral component of plasma membrane [GO:0005887]; plasmodesma [GO:0009506]; water channel activity [GO:0015250]; hydrogen peroxide transmembrane transport [GO:0080170]; ion transmembrane transport [GO:0034220]; response to abscisic acid [GO:0009737]; root hair elongation [GO:0048767]
XLOC_044606	utg8695.8	utg8695|GWHAAAA00006650:58092-69208	CP_TkMS2	9.87392	170.131	4.10688	5.15133	5e-05	0.0151307	yes	XP_021973155.1	aquaporin PIP2-4-like [Helianthus annuus]	Q9FF53	Probable aquaporin PIP2-4 (Plasma membrane intrinsic protein 2.4) (AtPIP2;4) [Cleaved into: Probable aquaporin PIP2-4, N-terminally processed]	GO:0005887; GO:0009506; GO:0009737; GO:0015250; GO:0034220; GO:0048767; GO:0080170	integral component of plasma membrane [GO:0005887]; plasmodesma [GO:0009506]; water channel activity [GO:0015250]; hydrogen peroxide transmembrane transport [GO:0080170]; ion transmembrane transport [GO:0034220]; response to abscisic acid [GO:0009737]; root hair elongation [GO:0048767]
XLOC_044606	utg8695.9	utg8695|GWHAAAA00006650:58092-69208	CP_TkMS2	9.87392	170.131	4.10688	5.15133	5e-05	0.0151307	yes	XP_021973155.1	aquaporin PIP2-4-like [Helianthus annuus]	Q9FF53	Probable aquaporin PIP2-4 (Plasma membrane intrinsic protein 2.4) (AtPIP2;4) [Cleaved into: Probable aquaporin PIP2-4, N-terminally processed]	GO:0005887; GO:0009506; GO:0009737; GO:0015250; GO:0034220; GO:0048767; GO:0080170	integral component of plasma membrane [GO:0005887]; plasmodesma [GO:0009506]; water channel activity [GO:0015250]; hydrogen peroxide transmembrane transport [GO:0080170]; ion transmembrane transport [GO:0034220]; response to abscisic acid [GO:0009737]; root hair elongation [GO:0048767]
XLOC_044708	utg8748.6	utg8748|GWHAAAA00012965:20989-23368	CP_TkMS2	20.2985	305.064	3.90967	4.17082	0.0002	0.0360882	yes	KVI02715.1	Homeodomain-like protein [Cynara cardunculus var. scolymus]	Q9FDW1	Transcription factor MYB44 (Myb-related protein 44) (AtMYB44) (Myb-related protein R1) (AtMYBR1)	GO:0000981; GO:0001135; GO:0003700; GO:0005634; GO:0006351; GO:0006355; GO:0006357; GO:0009414; GO:0009651; GO:0009723; GO:0009733; GO:0009737; GO:0009738; GO:0009739; GO:0009751; GO:0009753; GO:0010200; GO:0010929; GO:0030154; GO:0042742; GO:0043565; GO:0044212; GO:0046686; GO:0050832; GO:2000022; GO:2000031	nucleus [GO:0005634]; DNA binding transcription factor activity [GO:0003700]; RNA polymerase II transcription factor activity, sequence-specific DNA binding [GO:0000981]; sequence-specific DNA binding [GO:0043565]; transcription factor activity, RNA polymerase II transcription factor recruiting [GO:0001135]; transcription regulatory region DNA binding [GO:0044212]; abscisic acid-activated signali…
XLOC_044781	utg8777.13	utg8777|GWHAAAA00020722:84156-86370	CP_TkMS2	1303.45	20.1575	-6.01487	-7.0633	0.0001	0.025044	yes	KVI02750.1	Helix-turn-helix motif-containing protein [Cynara cardunculus var. scolymus]	O23208	Homeobox-leucine zipper protein ATHB-40 (HD-ZIP protein ATHB-40) (Homeodomain transcription factor ATHB-40)	GO:0003700; GO:0005634; GO:0006351; GO:0009733; GO:0043565	nucleus [GO:0005634]; DNA binding transcription factor activity [GO:0003700]; sequence-specific DNA binding [GO:0043565]; response to auxin [GO:0009733]; transcription, DNA-templated [GO:0006351]
XLOC_045033	utg8896.7	utg8896|GWHAAAA00030361:19663-20496	CP_TkMS2	352.977	7.49602	-5.55731	-8.08536	5e-05	0.0151307	yes	WP_014945432.1	hypothetical protein [Chlamydia psittaci]	Q6MJ09	DNA-directed RNA polymerase subunit beta (RNAP subunit beta) (EC 2.7.7.6) (RNA polymerase subunit beta) (Transcriptase subunit beta)	GO:0003677; GO:0003899; GO:0006351; GO:0032549	DNA binding [GO:0003677]; DNA-directed 5'-3' RNA polymerase activity [GO:0003899]; ribonucleoside binding [GO:0032549]; transcription, DNA-templated [GO:0006351]
XLOC_045066	utg8915.2	utg8915|GWHAAAA00002468:8223-8973	CP_TkMS2	4.69011	0	-Inf	NA	0.0002	0.0360882	yes	XP_021970152.1	berberine bridge enzyme-like 8 [Helianthus annuus]	Q9FKU9	Berberine bridge enzyme-like 25 (AtBBE-like 25) (EC 1.1.1.-)	GO:0005576; GO:0005618; GO:0016614; GO:0050660	cell wall [GO:0005618]; extracellular region [GO:0005576]; flavin adenine dinucleotide binding [GO:0050660]; oxidoreductase activity, acting on CH-OH group of donors [GO:0016614]
XLOC_045447	utg9054.7	utg9054|GWHAAAA00012652:11978-14824	CP_TkMS2	199.393	8.45554	-4.55957	-5.63022	5e-05	0.0151307	yes	KVH99961.1	Drug/metabolite transporter [Cynara cardunculus var. scolymus]	Q9ZUS1	WAT1-related protein At2g37460	GO:0005886; GO:0015171; GO:0016021; GO:0032973; GO:0043090; GO:0080144	integral component of membrane [GO:0016021]; plasma membrane [GO:0005886]; amino acid transmembrane transporter activity [GO:0015171]; amino acid export [GO:0032973]; amino acid homeostasis [GO:0080144]; amino acid import [GO:0043090]
XLOC_045788	utg9220.3	utg9220|GWHAAAA00002264:6273-10743	CP_TkMS2	107.222	3.94645	-4.7639	-5.62016	0.00015	0.0327643	yes	KVH88731.1	CheY-like superfamily, partial [Cynara cardunculus var. scolymus]	B8B3I4	Two-component response regulator ORR22	GO:0000160; GO:0003700; GO:0005634; GO:0006351; GO:0009736; GO:0043565; GO:0045893	nucleus [GO:0005634]; DNA binding transcription factor activity [GO:0003700]; sequence-specific DNA binding [GO:0043565]; cytokinin-activated signaling pathway [GO:0009736]; phosphorelay signal transduction system [GO:0000160]; positive regulation of transcription, DNA-templated [GO:0045893]; transcription, DNA-templated [GO:0006351]
XLOC_046290	utg945.3	utg945|GWHAAAA00028331:32168-33368	CP_TkMS2	2.2301	0	-Inf	NA	0.0003	0.0473658	yes	OAY31631.1	hypothetical protein MANES_14G128000 [Manihot esculenta]	P49013	Fibropellin-3 (Epidermal growth factor-related protein 3) (Fibropellin III) (Fibropellin-c) (SpEGF III)	GO:0005509; GO:0005615	extracellular space [GO:0005615]; calcium ion binding [GO:0005509]
XLOC_046501	-	utg9562|GWHAAAA00017865:18280-19672	CP_TkMS2	0	7.33613	Inf	NA	5e-05	0.0151307	yes	.	.	.	.	.	.
XLOC_046958	-	utg9857|GWHAAAA00000229:22229-22800	CP_TkMS2	8.72699	0	-Inf	NA	5e-05	0.0151307	yes	.	.	.	.	.	.
XLOC_046997	-	utg9882|GWHAAAA00017213:19646-20907	CP_TkMS2	3.99164	0	-Inf	NA	5e-05	0.0151307	yes	.	.	.	.	.	.
XLOC_047202	utg9980.1	utg9980|GWHAAAA00011241:4853-6769	CP_TkMS2	58.5489	3.42143	-4.09697	-4.30753	0.0002	0.0360882	yes	XP_021969828.1	endonuclease III homolog 1, chloroplastic-like [Helianthus annuus]	Q9SIC4	Endonuclease III homolog 1, chloroplastic (AtNTH1) (EC 3.2.2.-) (EC 4.2.99.18) (Bifunctional DNA N-glycosylase/DNA-(apurinic or apyrimidinic site) lyase 1) (DNA glycosylase/AP lyase 1)	GO:0000703; GO:0003677; GO:0003906; GO:0005634; GO:0006284; GO:0006285; GO:0006296; GO:0019104; GO:0042644; GO:0046872; GO:0051539; GO:0140078; GO:0140080	chloroplast nucleoid [GO:0042644]; nucleus [GO:0005634]; 4 iron, 4 sulfur cluster binding [GO:0051539]; class I DNA-(apurinic or apyrimidinic site) lyase activity [GO:0140078]; class III/IV DNA-(apurinic or apyrimidinic site) lyase activity [GO:0140080]; DNA binding [GO:0003677]; DNA N-glycosylase activity [GO:0019104]; DNA-(apurinic or apyrimidinic site) lyase activity [GO:0003906]; metal ion bi…
XLOC_000294	utg10132.4	utg10132|GWHAAAA00001868:18248-19984	CP_TkMS3	1.47832	0	-Inf	NA	5e-05	0.0219777	yes	CCA94610.1	polyphenol oxidase precursor (chloroplast) (chloroplast) [Taraxacum officinale]	Q9ZP19	Polyphenol oxidase I, chloroplastic (PPO-I) (EC 1.10.3.1) (Catechol oxidase I)	GO:0004097; GO:0005507; GO:0009543	chloroplast thylakoid lumen [GO:0009543]; catechol oxidase activity [GO:0004097]; copper ion binding [GO:0005507]
XLOC_000977	utg10479.8	utg10479|GWHAAAA00008679:52657-60308	CP_TkMS3	6.1927	43.7792	2.82161	4.23503	5e-05	0.0219777	yes	XP_022017115.1	GDSL esterase/lipase At1g29660-like [Helianthus annuus]	Q9C7N5	GDSL esterase/lipase At1g29660 (EC 3.1.1.-) (Apoplastic EDS1-dependent protein 3) (Extracellular lipase At1g29660)	GO:0005634; GO:0009627; GO:0016042; GO:0016788; GO:0048046	apoplast [GO:0048046]; nucleus [GO:0005634]; hydrolase activity, acting on ester bonds [GO:0016788]; lipid catabolic process [GO:0016042]; systemic acquired resistance [GO:0009627]
XLOC_001347	-	utg10668|GWHAAAA00015344:16310-16596	CP_TkMS3	0	21.17	Inf	NA	5e-05	0.0219777	yes	.	.	.	.	.	.
XLOC_001487	utg10749.1	utg10749|GWHAAAA00029736:306-4081	CP_TkMS3	76.8124	622.404	3.01844	4.39963	5e-05	0.0219777	yes	KVI01498.1	Alpha crystallin/Hsp20 domain-containing protein [Cynara cardunculus var. scolymus]	P46516	17.9 kDa class II heat shock protein	GO:0005737	cytoplasm [GO:0005737]
XLOC_001487	utg10749.2	utg10749|GWHAAAA00029736:306-4081	CP_TkMS3	76.8124	622.404	3.01844	4.39963	5e-05	0.0219777	yes	KVI01498.1	Alpha crystallin/Hsp20 domain-containing protein [Cynara cardunculus var. scolymus]	P46516	17.9 kDa class II heat shock protein	GO:0005737	cytoplasm [GO:0005737]
XLOC_001986	-	utg11016|GWHAAAA00012656:14694-16006	CP_TkMS3	42.2138	4.24584	-3.31359	-6.08421	5e-05	0.0219777	yes	.	.	.	.	.	.
XLOC_002820	utg1145.1	utg1145|GWHAAAA00014302:1807-3939	CP_TkMS3	0	1.42035	Inf	NA	0.00015	0.0478338	yes	XP_022033803.1	uncharacterized protein LOC110935763 [Helianthus annuus]	Q8I0G4	Zinc finger DHHC domain-containing protein 4	GO:0016021; GO:0016746	integral component of membrane [GO:0016021]; transferase activity, transferring acyl groups [GO:0016746]
XLOC_002821	utg1145.2	utg1145|GWHAAAA00014302:4905-9081	CP_TkMS3	4.56128	123.547	4.75947	7.53779	5e-05	0.0219777	yes	XP_021969277.1	BAG family molecular chaperone regulator 6 isoform X1 [Helianthus annuus]	O65373	BAG family molecular chaperone regulator 5, mitochondrial (Bcl-2-associated athanogene 5)	GO:0005516; GO:0005739; GO:0006457; GO:0009266; GO:0009506; GO:0043207; GO:0051087	mitochondrion [GO:0005739]; plasmodesma [GO:0009506]; calmodulin binding [GO:0005516]; chaperone binding [GO:0051087]; protein folding [GO:0006457]; response to external biotic stimulus [GO:0043207]; response to temperature stimulus [GO:0009266]
XLOC_003011	-	utg1157|GWHAAAA00004085:66865-67842	CP_TkMS3	0	1.10539	Inf	NA	0.00015	0.0478338	yes	.	.	.	.	.	.
XLOC_003563	utg11846.1	utg11846|GWHAAAA00017733:3231-4959	CP_TkMS3	218.241	9.34685	-4.5453	-7.90996	5e-05	0.0219777	yes	XP_022022048.1	senescence-specific cysteine protease SAG39-like [Helianthus annuus]	A2XQE8	Senescence-specific cysteine protease SAG39 (EC 3.4.22.-) (Cysteine proteinase SAG39) (Protein SENESCENCE-ASSOCIATED GENE 39)	GO:0007568; GO:0008234; GO:0009723; GO:0009737; GO:0009739; GO:0010150; GO:0010282; GO:0010623	senescence-associated vacuole [GO:0010282]; cysteine-type peptidase activity [GO:0008234]; aging [GO:0007568]; leaf senescence [GO:0010150]; programmed cell death involved in cell development [GO:0010623]; response to abscisic acid [GO:0009737]; response to ethylene [GO:0009723]; response to gibberellin [GO:0009739]
XLOC_004384	utg12341.3	utg12341|GWHAAAA00027422:7339-8209	CP_TkMS3	80.4414	9.63286	-3.0619	-4.56378	5e-05	0.0219777	yes	XP_022033787.1	uncharacterized protein LOC110935746 isoform X2 [Helianthus annuus]	Q5GSS5	Alanine--tRNA ligase (EC 6.1.1.7) (Alanyl-tRNA synthetase) (AlaRS)	GO:0000049; GO:0004813; GO:0005524; GO:0005737; GO:0006419; GO:0046872	cytoplasm [GO:0005737]; alanine-tRNA ligase activity [GO:0004813]; ATP binding [GO:0005524]; metal ion binding [GO:0046872]; tRNA binding [GO:0000049]; alanyl-tRNA aminoacylation [GO:0006419]
XLOC_004404	utg12353.7	utg12353|GWHAAAA00006926:27979-29599	CP_TkMS3	4.2639	28.1105	2.72086	4.95334	0.00015	0.0478338	yes	XP_022012637.1	uncharacterized protein LOC110912260 [Helianthus annuus]	Q91XQ4	DNA-directed RNA polymerase II subunit GRINL1A (DNA-directed RNA polymerase II subunit M) (Glutamate receptor-like protein 1A)	GO:0003899; GO:0016591; GO:0043025; GO:0051685	DNA-directed RNA polymerase II, holoenzyme [GO:0016591]; neuronal cell body [GO:0043025]; DNA-directed 5'-3' RNA polymerase activity [GO:0003899]; maintenance of ER location [GO:0051685]
XLOC_004602	utg12494.4	utg12494|GWHAAAA00016949:22781-26745	CP_TkMS3	3.42041	64.9534	4.24716	6.44154	5e-05	0.0219777	yes	XP_021983848.1	chaperone protein ClpB1-like [Helianthus annuus]	P42730	Chaperone protein ClpB1 (ATP-dependent Clp protease ATP-binding subunit ClpB homolog 1) (Casein lytic proteinase B1) (Heat shock protein 101) (Protein DEFECTIVE IN LONG-TERM ACQUIRED THERMOTOLERANCE)	GO:0005524; GO:0005634; GO:0005829; GO:0009408; GO:0009570; GO:0009644; GO:0009941; GO:0019538; GO:0042542; GO:0043335; GO:0045727	chloroplast envelope [GO:0009941]; chloroplast stroma [GO:0009570]; cytosol [GO:0005829]; nucleus [GO:0005634]; ATP binding [GO:0005524]; positive regulation of translation [GO:0045727]; protein metabolic process [GO:0019538]; protein unfolding [GO:0043335]; response to heat [GO:0009408]; response to high light intensity [GO:0009644]; response to hydrogen peroxide [GO:0042542]
XLOC_004674	utg1251.21	utg1251|GWHAAAA00016784:70766-71641	CP_TkMS3	8.35837	65.0049	2.95926	4.54361	5e-05	0.0219777	yes	XP_004505963.1	PREDICTED: 17.3 kDa class I heat shock protein-like [Cicer arietinum]	P02519	17.3 kDa class I heat shock protein (HSP 17.3)	GO:0005737	cytoplasm [GO:0005737]
XLOC_004675	utg1251.23	utg1251|GWHAAAA00016784:75769-76986	CP_TkMS3	46.2523	481.952	3.38129	4.91998	5e-05	0.0219777	yes	XP_015873917.1	PREDICTED: 18.5 kDa class I heat shock protein-like [Ziziphus jujuba]	P02519	17.3 kDa class I heat shock protein (HSP 17.3)	GO:0005737	cytoplasm [GO:0005737]
XLOC_004676	utg1251.24	utg1251|GWHAAAA00016784:79370-80442	CP_TkMS3	6.77685	100.543	3.89105	7.60471	5e-05	0.0219777	yes	XP_015873917.1	PREDICTED: 18.5 kDa class I heat shock protein-like [Ziziphus jujuba]	P02519	17.3 kDa class I heat shock protein (HSP 17.3)	GO:0005737	cytoplasm [GO:0005737]
XLOC_004704	utg12536.15	utg12536|GWHAAAA00024432:54295-56862	CP_TkMS3	10.8649	319.971	4.88019	6.67209	5e-05	0.0219777	yes	XP_021771057.1	probable mediator of RNA polymerase II transcription subunit 37c [Chenopodium quinoa]	Q9LHA8	Probable mediator of RNA polymerase II transcription subunit 37c (Heat shock 70 kDa protein 4) (Heat shock cognate 70 kDa protein 4) (Heat shock cognate protein 70-4) (AtHsc70-4) (Heat shock protein 70-4) (AtHsp70-4)	GO:0005524; GO:0005618; GO:0005634; GO:0005739; GO:0005774; GO:0005794; GO:0005829; GO:0005886; GO:0006351; GO:0006355; GO:0009266; GO:0009408; GO:0009615; GO:0009617; GO:0009644; GO:0016567; GO:0031625; GO:0042542; GO:0046686; GO:0048046	apoplast [GO:0048046]; cell wall [GO:0005618]; cytosol [GO:0005829]; Golgi apparatus [GO:0005794]; mitochondrion [GO:0005739]; nucleus [GO:0005634]; plasma membrane [GO:0005886]; vacuolar membrane [GO:0005774]; ATP binding [GO:0005524]; ubiquitin protein ligase binding [GO:0031625]; protein ubiquitination [GO:0016567]; regulation of transcription, DNA-templated [GO:0006355]; response to bacterium…
XLOC_004759	utg12561.8	utg12561|GWHAAAA00012832:27798-31192	CP_TkMS3	17.6125	1.56104	-3.49602	-5.64775	0.0001	0.0369625	yes	XP_021994724.1	enolase [Helianthus annuus]	P26300	Enolase (EC 4.2.1.11) (2-phospho-D-glycerate hydro-lyase) (2-phosphoglycerate dehydratase)	GO:0000015; GO:0000287; GO:0004634; GO:0006096	phosphopyruvate hydratase complex [GO:0000015]; magnesium ion binding [GO:0000287]; phosphopyruvate hydratase activity [GO:0004634]; glycolytic process [GO:0006096]
XLOC_005841	utg13172.11	utg13172|GWHAAAA00013831:75676-77183	CP_TkMS3	28.8096	234.716	3.02629	5.84582	5e-05	0.0219777	yes	XP_022025858.1	chlorophyll a-b binding protein, chloroplastic-like [Helianthus annuus]	P13869	Chlorophyll a-b binding protein, chloroplastic (LHCI type II CAB)	GO:0009522; GO:0009523; GO:0009535; GO:0009765; GO:0016021; GO:0016168; GO:0018298; GO:0046872	chloroplast thylakoid membrane [GO:0009535]; integral component of membrane [GO:0016021]; photosystem I [GO:0009522]; photosystem II [GO:0009523]; chlorophyll binding [GO:0016168]; metal ion binding [GO:0046872]; photosynthesis, light harvesting [GO:0009765]; protein-chromophore linkage [GO:0018298]
XLOC_006551	-	utg13586|GWHAAAA00026899:3907-5928	CP_TkMS3	0.63248	0	-Inf	NA	0.00015	0.0478338	yes	.	.	.	.	.	.
XLOC_007201	utg13987.4	utg13987|GWHAAAA00019538:2215-2978	CP_TkMS3	1.83893	0	-Inf	NA	0.00015	0.0478338	yes	XP_021975700.1	cytochrome P450 94A1-like [Helianthus annuus]	O81117	Cytochrome P450 94A1 (EC 1.14.-.-) (P450-dependent fatty acid omega-hydroxylase)	GO:0004497; GO:0005506; GO:0005789; GO:0016021; GO:0016705; GO:0020037	endoplasmic reticulum membrane [GO:0005789]; integral component of membrane [GO:0016021]; heme binding [GO:0020037]; iron ion binding [GO:0005506]; monooxygenase activity [GO:0004497]; oxidoreductase activity, acting on paired donors, with incorporation or reduction of molecular oxygen [GO:0016705]
XLOC_007714	utg14297.14	utg14297|GWHAAAA00000900:81479-82683	CP_TkMS3	185.576	19.4718	-3.25255	-7.12661	5e-05	0.0219777	yes	KVI10746.1	hypothetical protein Ccrd_010835 [Cynara cardunculus var. scolymus]	Q9XIM0	CCG-binding protein 1 (AtCBP1) (Protein MATERNAL EFFECT EMBRYO ARREST 14)	GO:0005634; GO:0005829; GO:0009507; GO:0009793; GO:0010183; GO:0036033; GO:0050832	chloroplast [GO:0009507]; cytosol [GO:0005829]; nucleus [GO:0005634]; mediator complex binding [GO:0036033]; defense response to fungus [GO:0050832]; embryo development ending in seed dormancy [GO:0009793]; pollen tube guidance [GO:0010183]
XLOC_007899	utg14388.24	utg14388|GWHAAAA00004858:108358-109940	CP_TkMS3	42.6662	3.37271	-3.66111	-6.47701	5e-05	0.0219777	yes	KVH95587.1	Ribonuclease CAF1 [Cynara cardunculus var. scolymus]	Q9FMS6	Probable CCR4-associated factor 1 homolog 11 (EC 3.1.13.4)	GO:0000289; GO:0000932; GO:0003723; GO:0004535; GO:0005634; GO:0006351; GO:0006355; GO:0008408; GO:0017148; GO:0030015; GO:0042742; GO:0043928; GO:0046872	CCR4-NOT core complex [GO:0030015]; nucleus [GO:0005634]; P-body [GO:0000932]; 3'-5' exonuclease activity [GO:0008408]; metal ion binding [GO:0046872]; poly(A)-specific ribonuclease activity [GO:0004535]; RNA binding [GO:0003723]; defense response to bacterium [GO:0042742]; exonucleolytic nuclear-transcribed mRNA catabolic process involved in deadenylation-dependent decay [GO:0043928]; negative r…
XLOC_008220	utg14564.1	utg14564|GWHAAAA00023104:11913-14338	CP_TkMS3	54.5991	6.18391	-3.14229	-5.54933	5e-05	0.0219777	yes	KVH93938.1	Senescence regulator [Cynara cardunculus var. scolymus]	B1I194	Bifunctional protein GlmU [Includes: UDP-N-acetylglucosamine pyrophosphorylase (EC 2.7.7.23) (N-acetylglucosamine-1-phosphate uridyltransferase); Glucosamine-1-phosphate N-acetyltransferase (EC 2.3.1.157)]	GO:0000287; GO:0000902; GO:0003977; GO:0005737; GO:0006048; GO:0008360; GO:0009103; GO:0009245; GO:0009252; GO:0019134; GO:0071555	cytoplasm [GO:0005737]; glucosamine-1-phosphate N-acetyltransferase activity [GO:0019134]; magnesium ion binding [GO:0000287]; UDP-N-acetylglucosamine diphosphorylase activity [GO:0003977]; cell morphogenesis [GO:0000902]; cell wall organization [GO:0071555]; lipid A biosynthetic process [GO:0009245]; lipopolysaccharide biosynthetic process [GO:0009103]; peptidoglycan biosynthetic process [GO:000…
XLOC_008328	utg14629.11	utg14629|GWHAAAA00018449:56294-58543	CP_TkMS3	523.531	45.8859	-3.51215	-5.98473	0.0001	0.0369625	yes	XP_022013535.1	probable 2-oxoglutarate-dependent dioxygenase At5g05600 isoform X1 [Helianthus annuus]	Q9FFF6	Probable 2-oxoglutarate-dependent dioxygenase At5g05600 (EC 1.14.11.-)	GO:0005829; GO:0009813; GO:0046872; GO:0051213; GO:0080167; GO:0097237; GO:0120091; GO:2000022	cytosol [GO:0005829]; dioxygenase activity [GO:0051213]; jasmonic acid hydrolase [GO:0120091]; metal ion binding [GO:0046872]; cellular response to toxic substance [GO:0097237]; flavonoid biosynthetic process [GO:0009813]; regulation of jasmonic acid mediated signaling pathway [GO:2000022]; response to karrikin [GO:0080167]
XLOC_009020	utg15128.6	utg15128|GWHAAAA00007279:17507-22630	CP_TkMS3	4.1146	70.0561	4.08969	6.0014	5e-05	0.0219777	yes	XP_012468435.1	PREDICTED: heat shock cognate 70 kDa protein 2 [Gossypium raimondii]	P09189	Heat shock cognate 70 kDa protein	GO:0005524	ATP binding [GO:0005524]
XLOC_009244	utg15245.1	utg15245|GWHAAAA00009684:2941-3677	CP_TkMS3	45.7012	289.899	2.66524	6.29939	0.0001	0.0369625	yes	ABL10073.1	17.7 KD class I small heat-shock protein [Ageratina adenophora]	P13853	17.6 kDa class I heat shock protein 3 (17.6 kDa heat shock protein 3) (AtHsp17.6C)	GO:0005737	cytoplasm [GO:0005737]
XLOC_011936	utg16926.7	utg16926|GWHAAAA00020580:26463-29241	CP_TkMS3	1.06837	0	-Inf	NA	0.0001	0.0369625	yes	XP_022016012.1	random slug protein 5-like [Helianthus annuus]	Q9UU99	CRAL-TRIO domain-containing protein C23B6.04c	GO:0005628; GO:0005886; GO:0008526; GO:0045332	plasma membrane [GO:0005886]; prospore membrane [GO:0005628]; phosphatidylinositol transporter activity [GO:0008526]; phospholipid translocation [GO:0045332]
XLOC_012210	utg17132.2	utg17132|GWHAAAA00027519:19329-20816	CP_TkMS3	0.861085	0	-Inf	NA	0.00015	0.0478338	yes	KZV56452.1	ADP,ATP carrier protein, mitochondrial [Dorcoceras hygrometricum]	P25083	ADP,ATP carrier protein, mitochondrial (ADP/ATP translocase) (Adenine nucleotide translocator) (ANT)	GO:0005743; GO:0016021; GO:0022857	integral component of membrane [GO:0016021]; mitochondrial inner membrane [GO:0005743]; transmembrane transporter activity [GO:0022857]
XLOC_012658	utg1748.8	utg1748|GWHAAAA00013465:47468-50562	CP_TkMS3	58.8609	9.44999	-2.63893	-4.17966	0.0001	0.0369625	yes	KVH97050.1	Glucose/ribitol dehydrogenase [Cynara cardunculus var. scolymus]	Q94KL7	Secoisolariciresinol dehydrogenase (EC 1.1.1.331) (Fragment)	GO:0016491	oxidoreductase activity [GO:0016491]
XLOC_012812	utg175.16	utg175|GWHAAAA00010649:74507-76210	CP_TkMS3	45.1516	6.25473	-2.85176	-5.2977	5e-05	0.0219777	yes	KVI10601.1	FAS1 domain-containing protein [Cynara cardunculus var. scolymus]	Q9SU13	Fasciclin-like arabinogalactan protein 2	GO:0005774; GO:0005886; GO:0016020; GO:0031225; GO:0046658	anchored component of membrane [GO:0031225]; anchored component of plasma membrane [GO:0046658]; membrane [GO:0016020]; plasma membrane [GO:0005886]; vacuolar membrane [GO:0005774]
XLOC_013811	utg1827.12	utg1827|GWHAAAA00008521:80272-82207	CP_TkMS3	0	0.742572	Inf	NA	5e-05	0.0219777	yes	KVH91652.1	Pentatricopeptide repeat-containing protein [Cynara cardunculus var. scolymus]	Q9C6T2	Pentatricopeptide repeat-containing protein At1g31920	GO:0003723; GO:0004519; GO:0008270; GO:0009451; GO:0043231	intracellular membrane-bounded organelle [GO:0043231]; endonuclease activity [GO:0004519]; RNA binding [GO:0003723]; zinc ion binding [GO:0008270]; RNA modification [GO:0009451]
XLOC_013878	utg18320.20	utg18320|GWHAAAA00003431:5723-7686	CP_TkMS3	95.3244	10.6719	-3.15903	-5.7265	5e-05	0.0219777	yes	KVI06601.1	cytochrome P450 [Cynara cardunculus var. scolymus]	O49858	Cytochrome P450 82A3 (EC 1.14.-.-) (Cytochrome P450 CP6)	GO:0005506; GO:0016020; GO:0016709; GO:0020037; GO:0044550	membrane [GO:0016020]; heme binding [GO:0020037]; iron ion binding [GO:0005506]; oxidoreductase activity, acting on paired donors, with incorporation or reduction of molecular oxygen, NAD(P)H as one donor, and incorporation of one atom of oxygen [GO:0016709]; secondary metabolite biosynthetic process [GO:0044550]
XLOC_013980	utg18401.1	utg18401|GWHAAAA00027681:1044-2995	CP_TkMS3	6.26493	39.8245	2.66828	4.08699	0.00015	0.0478338	yes	P22357.1	RecName: Full=Anther-specific protein SF18; AltName: Full=Defensin-like protein; Flags: Precursor	P22357	Anther-specific protein SF18 (Defensin-like protein) (Fragment)	GO:0005576; GO:0005618; GO:0006952; GO:0071555	cell wall [GO:0005618]; extracellular region [GO:0005576]; cell wall organization [GO:0071555]; defense response [GO:0006952]
XLOC_014357	utg18685.1	utg18685|GWHAAAA00000303:37-918	CP_TkMS3	24.905	312.558	3.64962	7.75297	5e-05	0.0219777	yes	XP_015956435.1	17.3 kDa class I heat shock protein [Arachis duranensis]	P02519	17.3 kDa class I heat shock protein (HSP 17.3)	GO:0005737	cytoplasm [GO:0005737]
XLOC_016447	utg20169.2	utg20169|GWHAAAA00017155:9001-12081	CP_TkMS3	37.3846	2.43378	-3.94117	-6.70855	5e-05	0.0219777	yes	XP_022037342.1	protein GRAVITROPIC IN THE LIGHT 1-like [Helianthus annuus]	F4KGE8	Protein GRAVITROPIC IN THE LIGHT 1	GO:0009639; GO:0009959	negative gravitropism [GO:0009959]; response to red or far red light [GO:0009639]
XLOC_016499	-	utg2020|GWHAAAA00025219:127132-128475	CP_TkMS3	1.44236	0	-Inf	NA	5e-05	0.0219777	yes	.	.	.	.	.	.
XLOC_016539	utg20245.10	utg20245|GWHAAAA00003503:33034-36581	CP_TkMS3	5.02642	33.9065	2.75396	4.9897	5e-05	0.0219777	yes	XP_022015301.1	heat shock protein 90-5, chloroplastic-like [Helianthus annuus]	Q9SIF2	Heat shock protein 90-5, chloroplastic (AtHSP90.5) (AtHsp90-5) (Heat shock protein 88-1) (Hsp88-1) (Hsp90C) (Protein EMBRYO DEFECTIVE 1956) (Protein chlorate-resistance 88)	GO:0005524; GO:0005739; GO:0005774; GO:0006457; GO:0009408; GO:0009414; GO:0009507; GO:0009536; GO:0009570; GO:0009651; GO:0009704; GO:0009941; GO:0010157; GO:0042803; GO:0045037; GO:0051082	chloroplast [GO:0009507]; chloroplast envelope [GO:0009941]; chloroplast stroma [GO:0009570]; mitochondrion [GO:0005739]; plastid [GO:0009536]; vacuolar membrane [GO:0005774]; ATP binding [GO:0005524]; protein homodimerization activity [GO:0042803]; unfolded protein binding [GO:0051082]; de-etiolation [GO:0009704]; protein folding [GO:0006457]; protein import into chloroplast stroma [GO:0045037];…
XLOC_016638	utg20327.1	utg20327|GWHAAAA00007990:1959-3346	CP_TkMS3	35.9199	4.57229	-2.9738	-5.64362	5e-05	0.0219777	yes	XP_022027371.1	probable 6-phosphogluconolactonase 4, chloroplastic [Helianthus annuus]	Q69NG5	Probable 6-phosphogluconolactonase 4, chloroplastic (6PGL 4) (EC 3.1.1.31)	GO:0005737; GO:0005975; GO:0009051; GO:0009507; GO:0017057	chloroplast [GO:0009507]; cytoplasm [GO:0005737]; 6-phosphogluconolactonase activity [GO:0017057]; carbohydrate metabolic process [GO:0005975]; pentose-phosphate shunt, oxidative branch [GO:0009051]
XLOC_017340	utg20838.10	utg20838|GWHAAAA00005567:9648-10101	CP_TkMS3	7.41345	156.802	4.40266	12.2438	0.0001	0.0369625	yes	KVI01498.1	Alpha crystallin/Hsp20 domain-containing protein [Cynara cardunculus var. scolymus]	P46516	17.9 kDa class II heat shock protein	GO:0005737	cytoplasm [GO:0005737]
XLOC_018112	utg21517.1	utg21517|GWHAAAA00003645:0-6192	CP_TkMS3	12.429	85.5936	2.78379	4.43863	5e-05	0.0219777	yes	XP_022002061.1	cellulose synthase-like protein G3 [Helianthus annuus]	Q570S7	Cellulose synthase-like protein G1 (AtCslG1) (EC 2.4.1.-)	GO:0000139; GO:0005794; GO:0005886; GO:0009833; GO:0016021; GO:0016759; GO:0016760; GO:0030244; GO:0071555	Golgi apparatus [GO:0005794]; Golgi membrane [GO:0000139]; integral component of membrane [GO:0016021]; plasma membrane [GO:0005886]; cellulose synthase (UDP-forming) activity [GO:0016760]; cellulose synthase activity [GO:0016759]; cell wall organization [GO:0071555]; cellulose biosynthetic process [GO:0030244]; plant-type primary cell wall biogenesis [GO:0009833]
XLOC_018115	utg2151.6	utg2151|GWHAAAA00015923:21795-24698	CP_TkMS3	4.4006	30.7656	2.80554	4.46962	5e-05	0.0219777	yes	XP_022009310.1	ruBisCO large subunit-binding protein subunit beta, chloroplastic-like [Helianthus annuus]	P08927	RuBisCO large subunit-binding protein subunit beta, chloroplastic (60 kDa chaperonin subunit beta) (CPN-60 beta)	GO:0005524; GO:0009507; GO:0042026	chloroplast [GO:0009507]; ATP binding [GO:0005524]; protein refolding [GO:0042026]
XLOC_018303	utg216.4	utg216|GWHAAAA00007886:27447-30085	CP_TkMS3	78.2963	11.028	-2.82777	-5.04976	5e-05	0.0219777	yes	AML77560.1	putative LOV domain-containing protein [Cicerbita plumieri]	Q9C9W9	Adagio protein 3 (F-box only protein 2a) (FBX2a) (Flavin-binding kelch repeat F-box protein 1)	GO:0001047; GO:0005634; GO:0005737; GO:0006355; GO:0007623; GO:0009637; GO:0009881; GO:0009908; GO:0009911; GO:0010468; GO:0016567; GO:0018298	cytoplasm [GO:0005737]; nucleus [GO:0005634]; core promoter binding [GO:0001047]; photoreceptor activity [GO:0009881]; circadian rhythm [GO:0007623]; flower development [GO:0009908]; positive regulation of flower development [GO:0009911]; protein ubiquitination [GO:0016567]; protein-chromophore linkage [GO:0018298]; regulation of gene expression [GO:0010468]; regulation of transcription, DNA-temp…
XLOC_018314	-	utg216|GWHAAAA00007886:52310-54200	CP_TkMS3	0.733321	0	-Inf	NA	5e-05	0.0219777	yes	.	.	.	.	.	.
XLOC_018602	-	utg21959|GWHAAAA00015962:21634-23768	CP_TkMS3	0.682817	0	-Inf	NA	5e-05	0.0219777	yes	.	.	.	.	.	.
XLOC_020601	utg23625.3	utg23625|GWHAAAA00024064:5433-18721	CP_TkMS3	72.0701	8.61282	-3.06484	-5.32752	5e-05	0.0219777	yes	KVH95915.1	hypothetical protein Ccrd_002009 [Cynara cardunculus var. scolymus]	Q03HT2	4-hydroxy-tetrahydrodipicolinate synthase (HTPA synthase) (EC 4.3.3.7)	GO:0005737; GO:0008840; GO:0009089; GO:0019877	cytoplasm [GO:0005737]; 4-hydroxy-tetrahydrodipicolinate synthase [GO:0008840]; diaminopimelate biosynthetic process [GO:0019877]; lysine biosynthetic process via diaminopimelate [GO:0009089]
XLOC_020601	utg23625.6	utg23625|GWHAAAA00024064:5433-18721	CP_TkMS3	72.0701	8.61282	-3.06484	-5.32752	5e-05	0.0219777	yes	KVH95915.1	hypothetical protein Ccrd_002009 [Cynara cardunculus var. scolymus]	Q3EDH0	Scarecrow-like protein 31 (AtSCL31) (GRAS family protein 1) (AtGRAS-1)	GO:0003700; GO:0005634; GO:0006351; GO:0006355; GO:0010200; GO:0043565	nucleus [GO:0005634]; DNA binding transcription factor activity [GO:0003700]; sequence-specific DNA binding [GO:0043565]; regulation of transcription, DNA-templated [GO:0006355]; response to chitin [GO:0010200]; transcription, DNA-templated [GO:0006351]
XLOC_020601	utg23625.7	utg23625|GWHAAAA00024064:5433-18721	CP_TkMS3	72.0701	8.61282	-3.06484	-5.32752	5e-05	0.0219777	yes	KVH95926.1	Protein of unknown function wound-induced [Cynara cardunculus var. scolymus]	Q9SZY8	Probable indole-3-pyruvate monooxygenase YUCCA1 (EC 1.14.13.168) (Flavin-containing monooxygenase YUCCA1)	GO:0004499; GO:0009851; GO:0009911; GO:0010229; GO:0048825; GO:0048827; GO:0050660; GO:0050661; GO:0103075	flavin adenine dinucleotide binding [GO:0050660]; indole-3-pyruvate monooxygenase activity [GO:0103075]; N,N-dimethylaniline monooxygenase activity [GO:0004499]; NADP binding [GO:0050661]; auxin biosynthetic process [GO:0009851]; cotyledon development [GO:0048825]; inflorescence development [GO:0010229]; phyllome development [GO:0048827]; positive regulation of flower development [GO:0009911]
[truncated: 58 more rows]

## Sheet: Table_S5
Supplementary Table 5: DEGs in SP T1 vs. T0
XLOC_id	gene	locus	sample	value_T1	value_T0	log2(fold_change)	test_stat	p_value	FDR_p-value_correction	significant	Homology based description (NCBI_Entry_ID)	Homology based description NCBI (Protein names)	Homology based description (Uniprot_Entry_ID)	Homology based description UniProt (Protein names)	Gene ontology IDs	Gene ontology (GO)
XLOC_000161	utg10089.1	utg10089|GWHAAAA00004372:10644-12613	SP_TkMS2	21.0849	5.07035	-2.05605	-6.19818	5e-05	0.0155519	yes	KVH97581.1	protein of unknown function DUF292, eukaryotic, partial [Cynara cardunculus var. scolymus]	Q54I39	IST1-like protein	GO:0015031	protein transport [GO:0015031]
[truncated: 307 more rows]

## Sheet: Table_S6
Supplementary Table 6: DEGs in SP T2 vs. T1
[truncated: 285 more rows]

## Sheet: Table_S7
Supplementary Table 7: DEGs in SP T2 vs. T0
[truncated: 274 more rows]

## Sheet: Table_S8
Supplementary Table 8: Subsets of DEGs used for Venn analysis
[truncated: 464 more rows]

[truncated: 2 more sheets: Table_S9, Table_S10]
